# Supplementary material
Source: publisher figshare collection journal article supplement (https://tandf.figshare.com/articles/dataset/_/6203678)
Supplement: Supplementary file 1 [file 1]

**Appendix 1**

**Examples of Technical and Popular Articles,**

**Environmental and Management Documents, and Media Releases Claiming that the American Pika is at Grave Risk of Extinction due to Climate Change**

**1. Technical Literature**

Beever, E. A., Brussard, P. F., and Berger, J., 2003: Patterns of apparent extirpation among

isolated populations of pikas (*Ochotona princeps*) in the Great Basin. *Journal of*

*Mammalogy,* 84: 37–54.

Beever, E. A., Ray, C., Mote, P. W., and Wilkening, J. L., 2010: Testing alternative models of

climate-mediated extirpations. *Ecological Applications*, 20: 164–178.

Beever, E. A., Ray, C., Wilkening, J. L., Brussard, P. F., and Mote, P. W., 2011: Contemporary

climate change alters the pace and drivers of extinction. *Global Change Biology,* 17: 2054-

2070.

Beever, E. A., Perrine, J. D., Rickman, T., Flores, M., Clark, J. P., Waters, C., Weber, S. S.,

Yardley, B., Thoma, D., Chesley-Preston, T., Goehring, K. E., Magnuson, M., Nordenstein,

N., Nelson, M., and Collins, G. H., 2016: Pika (*Ochotona princeps*) losses from two isolated

regions reflect temperature and water balance, but reflect habitat area in a mainland region.

*Journal of Mammalogy,* 97: 1495–1511.

Beever, E. A., Dobrowski, S. Z., Long, J., Mynsberge, A. R., and Piekielek, N. B., 2013:

Understanding relationships among abundance, extirpation, and climate at ecoregional scales. Ecology, 94: 1583-1571.

Beever, E. A., Perrine, J. D., Rickman, T., Flores, M., Clark, J. P., Waters, C., Weber, S. S.,

Yardley, B., Thoma, D., Chesley-Preston, T., Goehring, K. E., Magnuson, M., Nordenstein,

N., Nelson, M., and Collins, G. H., 2016: Pika (*Ochotona princeps*) losses from two isolated

regions reflect temperature and water balance, but reflect habitat area in a mainland region.

*Journal of Mammalogy,* 97: 1495–1511.

Calkins, M. T., Beever, E. A., Boykin, K. G., Frey, J. K., and Anderson, M. C., 2012: Not–so–

splendid isolation: modeling climate–mediated range collapse of a montane mammal

*Ochotona princeps* across numerous ecoregions. *Ecography,* 35: 780–791.

Galbreath, K. E., Hafner, D. J., and Zamudio, K. R., 2009: When cold is better: climate-driven

elevation shifts yield complex patterns of diversification and demography in an alpine specialist (American pika, *Ochotona princeps*). *Evolution,* 63: 2848–2863.

Nichols, L. B., Klingler, K. B., and Peacock, M. M., 2016: American pikas (*Ochotona princeps*)

extirpated from the historic masonic mining district of eastern California. *Western North American Naturalist,* 76: 163–171.

Ray, C., Beever, E., and Loarie, S., 2012: Retreat of the American pika: Up the mountain or into

the void? *In* Brodie, J. F., Post, E., and Doak, D. F. (eds.), *Wildlife Populations in a Changing Climate*. University of Chicago Press: Chicago, 245-270.

Stewart, A. T., Perrine, J. D., Nichols, L. B., Thorne, J. H., Millar, C. I., Goehring, K. E.,

Massing, C. P., and Wright, D. H., 2015: Revisiting the past to foretell the future: summer

temperature and habitat area predict pika extirpations in California. Journal of Biogeography,

42: 880-890.

Stewart, J.A.E., Wright, D.H., and Heckman, A. 2017. Apparent climate-mediated loss and fragmentation of core habitat of the American pika in the Northern Sierra Nevada, California,USA. PLoS ONE, 12: e0181834.

Wilkening, J. L., Ray, C., Beever, E. A., and Brussard, P. F., 2011: Modeling contemporary

range retraction in Great Basin pikas (*Ochotona princeps*) using data on microclimate and

microhabitat. *Quaternary International,* 235: 77–88.

**2. Popular Science Articles**

Beever, E., 2002: Persistence of pikas in two low-elevation national monuments in the western

United States. *Park Science*, 21. [Reprinted in *Sierra Nature Notes*, 2003, 3].

Beever, E., and Wilkening, J., 2011: Playing by new rules. Altered climates are affecting some

pikas dramatically—and rapidly. [Subtitles: “A Climate Loser” and “Lost to the Heat"]. *The Wildlife Professional*, 5: 38-41.

Holtcamp, W., 2010: Silence of the pikas. *BioScience*, 60: 8-12.

Saunders, S, Easley, T., Logan, J.A., and Spencer, T., 2007: Losing ground: Western national

parks endangered by climate disruption. *The George Wright Forum* 24: 41-81.

Smith, A. T., Li W., and Hik, D. S., 2004: Pikas as harbingers of global warming. Species 41: 4-5.

Wilkening, J. L., and Ray, C., 2015: Parks, pikas and physiological stress: Implications for long-

term monitoring of an NPS climate-sensitive sentinel species. *Park Science*, 32: 42-48.

**3. Environmental Documents**

Wolff, S., Nowicki, B., and Siegel, K., 2007a: Petition to list the American pika (*Ochotona*

*princeps*) as threatened under the California Endangered Species Act. Center for Biological Diversity: San Francisco, 49 pp.

Wolff, S., Nowicki, B., and Siegel, K., 2007b: Petition to list the American pika (*Ochotona*

*princeps*) as threatened under the United States Endangered Species Act. Center for Biological Diversity: San Francisco, 70 pp.

**4. Management-Related Projects**

Garrett, L., Jeffress, M., Britten, M., Epps, C., Ray, C., and Wolff, S., 2011: Pikas in peril:

Multiregional vulnerability assessment of a climate-sensitive sentinel species. *Park Science*, 28: 16–17.

National Park Service, Natural Resources Stewardship and Science Directorate, 2016: Pikas in

peril: Tiny mountain mammal faces uncertain future. <https://www.nps.gov.orgs/1778/pikas-in-peril.htm>.

**5. Media**

no date/author

National Wildlife Federation

Global Warming and the American Pika

<https://www.nwf.org/Wildlife/Threats-to-Wildlife/Global-Warming/Effects-on-Wildlife-and-Habitat/Pika>

no date/author

National Wildlife Federation

American Pika

<https://www.nwf.org/Wildlife/Wildlife-Library/Mammals/American-Pika.aspx>

no date

Smithsonian

Video: Pikas and Climate Change

Melinda Binks and Rebecca Huntington

<http://www.smithsonianmag.com/videos/category/3play_processed_94/pikas-and-climate-change/>

no date/author

Union of Concerned Scientists

Small Creatures and Climate Change

<http://www.ucsusa.org/global_warming/science_and_impacts/impacts/mammals-and-climate.html#.WanMqLKGPcs>

5 September 2017

Mother Nature Network

Adorable American Pikas Vanish From a Swath of California

Russell McLendon

<https://www.mnn.com/earth-matters/animals/blogs/american-pikas-sierra-nevada>

1 September 2017

Poetry of Science

Haiku: You All Fall Down

Samuel Illingworth

<https://thepoetryofscience.scienceblog.com/477/you-all-fall-down/>

1 September 2017

Point Blue

Science Daily

Blog; no author

American Pika Disappears From Large Area of California’s Sierra Nevada Mountains Due to Climate Change and Habitat Fragmentation

<http://www.pointblue.org/blog/sciencenews/index.php/2017/09/01/american-pika-disappears-from-large-area-of-californias-sierra-nevada-mountains-due-to-climate-change-and-habitat-fragmentation/>

31 August 2017

KQED Science

Climate Change Spells Extinction for Pikas of Lake Tahoe

Lesley McClurg

<https://ww2.kqed.org/science/2017/08/31/climate-change-spells-extinction-for-pikas-of-lake-tahoe/>

31 August 2017

Viridian Forest

Pikas, Animals Like Real-Life Pikachus, are in Danger and Twitter is Upset

Rebekah Valentine

<https://viridianforest.com/2017/08/31/pikas-animals-like-real-life-pikachus-danger-twitter-upset>

30 August 2017

Discover Magazine Blog

Pikas Are Disappearing from California’s Sierra Nevada Mountains

Carl Engelking

<http://blogs.discovermagazine.com/d-brief/2017/08/30/pikas-have-vanished-from-californias-sierra-nevada-mountains/#.WanWerKGPcs>

30 August 2017

Gizmodo

Adorable Animal Subsisting on Wildflowers and Kindness is in Serious Danger

Rae Paoletta

<http://gizmodo.com/adorable-animal-subsisting-on-wildflowers-and-kindness-1798626839>

30 August 2017

Live Science

Climate Change Is Driving These Cute Mountain Critters Out of Their Homes

Stephanie Pappas

<https://www.livescience.com/60281-climate-change-driving-pika-from-habitats.html>

30 August 2017

Science Daily

UC Santa Cruz

American Pika Disappears from Large Area of California's Sierra Nevada Mountains

no author

<https://www.sciencedaily.com/releases/2017/08/170830202154.htm>

30 August 2017

UC Santa Cruz News

American Pika Disappears from Large Area of California’s Sierra Nevada Mountains

Tim Stephens

<https://news.ucsc.edu/2017/08/pika-extinction.html?ref=share>

22 August 2017

High Country News

Will Only the Flexible Survive?

Maya L. Kapoor

<http://www.hcn.org/articles/climate-change-will-only-the-most-adaptable-species-survive>

10 August 2017

Mongabay

The American Pika: A Case Study in Wildlife Acclimating to Climate Change

Mike Gaworecki

<https://news.mongabay.com/2017/08/the-american-pika-a-case-study-in-wildlife-acclimating-to-climate-c>

3 August 2017

Scientific American

Climate Wire

Fuzzy Pikas Adapt to Climate Change at Different Rates

Adam Aton

<https://www.scientificamerican.com/article/fuzzy-pikas-adapt-to-climate-change-at-different-rates/>

27 October 2016

Huffington Post

Adorable American Pika Is Fast Disappearing, And We’re Doing Nothing To Stop It

Dominique Mosbergen

<http://www.huffingtonpost.com/entry/american-pika-protection-climate-change_us_580f2f63e4b0a03911ee8c9e>

12 September 2016

The Wildlife Society

Climate Change Wipes Out Pikas on Isolated Peaks

Nala Rogers

<http://wildlife.org/climate-change-wipes-out-pikas-on-isolated-peaks/>

30 August 2016

Live Science

Adorable American Pika Is Disappearing Due to Climate Change

Kacey Deamer

<https://www.livescience.com/55934-american-pika-endangered-climate-change.html>

30 August 2016

Popular Science

The Small, Furry Pika Is Losing Its Habitat To Climate Change

Kate Baggaley

<http://www.popsci.com/small-furry-pika-is-losing-its-habitat-to-climate-change>

25 August 2016

The Guardian

American Pika Vanishing rom Western US as 'Habitat Lost to Climate Change'

no author

<https://www.theguardian.com/environment/2016/aug/26/american-pika-vanishing-from-western-us-as-habitat-lost-to-climate-change>

25 August 2016

USGS

American pikas – small herbivores that typically live in rocky slopes, known as talus, across many mountain ranges in the American West – are disappearing from some locations across the West due to climate change, according to a study by the U.S. Geologic Service

no author

<https://www.usgs.gov/news/pikas-disappearing-parts-west-due-climate-change->

18 June 2016

President Barak Obama

NPS Centenial speech in Yosemite NP

<https://obamawhitehouse.archives.gov/the-press-office/2016/06/18/remarks-president-sentinel-bridge>

17 March 2016

The Wilderness Society

Climate Change Study: Pikas Could Disappear at 5 National Parks

Caroline Mosley

<http://wilderness.org/blog/climate-change-study-pikas-could-disappear-5-national-parks>

30 November 2015

National Wildlife Federation

Have Pikas Peaked?

Anne Bolen

<http://www.nwf.org/news-and-magazines/national-wildlife/animals/archives/2016/pikas.aspx>

1 October 2015

The Trail Posse

Pikas in Peril

Glenn Nelson

<http://trailposse.com/2015/10/pikas-in-peril/>

24 September 2015

National Wildlife Federation

blog

Bipartisan Climate Resolution Will Support Wildlife

Jenny Rowland

<http://blog.nwf.org/2015/09/bipartisan-climate-resolution-will-support-wildlife/>

1 August 2015

National Wildlife Federation - Ranger Rick

A Rocky Time for Pikas

no author

<https://www.nwf.org/Kids/Ranger-Rick/Animals/Mammals/Pikas.aspx>

1 April 2015

Watts Up with That?

National Wildlife Federation De-Volves Into Climate Alarmists

Jim Steele

<https://wattsupwiththat.com/2015/04/01/national-wildlife-federation-de-volves-into-climate-alarmists/>

2 February 2015

UC Santa Cruz News

Shrinking Range of Pikas in California Mountains Linked to Climate Change

Tim Stephens

<https://news.ucsc.edu/2015/02/pika-study.html>

29 May 2013

Quartz

Not Too Cute to Die - If We Don’t Do Something About Climate Change, the Pika is Toast

Todd Woody

<https://qz.com/88931/if-we-dont-do-something-about-climate-change-the-pika-is-toast/>

4 September 2012

Outside Magazine

Excerpt from The Spine of the Continent

Pika: The Alpine Poster Child for Climate Change

Mary Ellen Hannibal

<https://www.outsideonline.com/1903931/pika-alpine-poster-child-climate-change>

23 August 2012

Yellowstone NP

Video: The Pika as our Canary in the Coal Mine

no author

<https://www.youtube.com/watch?v=Qhr69byxbHk>

3 January 2012

Earth Justice

blog

Pikas Can Run But Not Hide From Climate Change

Kari Birdseye

<https://earthjustice.org/blog/2012-january/pikas-can-run-but-not-hide-from-climate-change>

23 December 2010

NewsReview.com-Chico

Are Pikas in Peril?

Alastair Bland

<https://www.newsreview.com/chico/are-pikas-in-peril/content?oid=1894313>

9 March 2010

National Parks Traveler

Is the American Pika Really on the Road to Extinction Due to Climate Change?

Kurt Repanshek

<https://www.nationalparkstraveler.org/2010/03/american-pika-really-road-extinction-due-climate-change5476>

8 February 2010

Earth Justice

blog

Monday Reads: Meet the Pika Edition (Getting to Know the Pika While We Still Can)

Shirley Hao

<https://earthjustice.org/blog/2010-february/monday-reads-meet-pika-edition>

30 December 2009

ABC News

American Pikas: Terminally Cute, in Serious Trouble

Bill Blakemore

<http://abcnews.go.com/Technology/NaturesEdge/american-pikas-endangered-climate-change-global-warming/story?id=9449800>

23 April 2009

Wild Tracks

Furballs in Danger

no author

<https://wildtracks.wordpress.com/2009/04/23/furballs-in-danger/>

4 April 2009

Phys.org - AP

As West Warms, Some Fear for Tiny Mountain Dweller

Mike Stark

<https://phys.org/news/2009-04-west-tiny-mountain-dweller.html>

1 December 2005

National Wildlife Federation

No Room at the Top

Paul Tolmé

<https://www.nwf.org/News-and-Magazines/National-Wildlife/Animals/Archives/2006/No-Room-at-the-Top.aspx>
