# Supplementary material
Source: publisher figshare collection journal article supplement (https://tandf.figshare.com/articles/dataset/_/6203678)
Supplement: Supplementary file 1 [file 1]

# Appendix 4: Master Database -- Extirpated Great Basin Pika Sites, Published and Unpublished Sources

9/5/17

| ID           | Mountain Range     | Location          | State | Coordinates |             | Elevation Site Specific or Mean (m) | Most Recent Record Extirpated | Citation (Published); Source (Unpublished) | Earliest Record of Extirpation | Most Recent Record Extant | Citation (Published); Source (Unpublished) |
|--------------|--------------------|-------------------|-------|-------------|-------------|-------------------------------------|-------------------------------|--------------------------------------------|--------------------------------|---------------------------|--------------------------------------------|
| Latitude     | Longitude          |                   |       |             |             |                                     |                               |                                            |                                |                           |                                            |
| Bodie-3      | Bodie Mountains    | Sugarloaf Peak    | CA    | 38.188800   | -119.009567 | 2602                                | 2016                          | Millar unpublished                         | 2007                           | 1977                      | Millar et al. 2014; Smith unpublished      |
| Mas-1        | Bodie Mountains    | Chemung Mine      | CA    | 38.349900   | -119.149067 | 2496                                | 2016                          | Millar unpublished                         | 2009                           | 2008                      | Millar et al. 2013                         |
| Aurora-1     | Bodie Mountains    | Aurora minesite   | NV    | 38.304083   | -118.901483 | 2113                                | 2010                          | Millar unpublished                         | 2007                           | 1970                      | Millar et al. 2014; Smith unpublished      |
| MOLY-3       | Sierra Nevada      | Molybdenite Cyn   | CA    | 38.244950   | -119.433944 | 2768                                | 2010                          | Millar unpublished                         | 2008                           |                           | Millar unpublished                         |
| Aurora-2     | Bodie Mountains    | Lower Brawley Pk  | NV    | 38.275383   | -118.900400 | 2403                                | 2010                          | Millar unpublished                         | 2007                           | 1970                      | Millar et al. 2014; Smith unpublished      |
| Aurora-3     | Bodie Mountains    | Lower Brawley Pk  | NV    | 38.274017   | -118.900783 | 2433                                | 2010                          | Millar unpublished                         | 2007                           | 1970                      | Millar et al. 2014; Smith unpublished      |
| Aurora-4     | Bodie Mountains    | Lower Brawley Pk  | NV    | 38.273167   | -118.898750 | 2455                                | 2010                          | Millar unpublished                         | 2007                           | 1970                      | Millar et al. 2014; Smith unpublished      |
| Aurora-5     | Bodie Mountains    | Lower Brawley Pk  | NV    | 38.272133   | -118.898983 | 2509                                | 2010                          | Millar unpublished                         | 2007                           | 1970                      | Millar et al. 2014; Smith unpublished      |
| AUR-BP-1     | Bodie Mountains    | Lower Brawley Pk  | NV    | 38.277217   | -118.901467 | 2338                                | 2011                          | Millar unpublished                         | 2007                           | 1970                      | Millar et al. 2014; Smith unpublished      |
| Brawley-2    | Bodie Mountains    | Brawley Pks       | NV    | 38.255283   | -118.909450 | 2847                                | 2011                          | Millar unpublished                         | 2007                           |                           | Millar et al. 2014                         |
| SLD-3        | Fremont Mountains  | Slide Mtn         | OR    | 42.685667   | -120.739117 | 1967                                | 2015                          | Millar unpublished                         | 2010                           |                           | Millar et al. 2014                         |
| SLD-4        | Fremont Mountains  | Slide Mtn         | OR    | 42.685483   | -120.738867 | 1961                                | 2015                          | Millar unpublished                         | 2010                           |                           | Millar unpublished                         |
| SLD-5        | Fremont Mountains  | Slide Mtn         | OR    | 42.685333   | -120.738950 | 1964                                | 2015                          | Millar unpublished                         | 2010                           |                           | Millar unpublished                         |
| SLD-6        | Fremont Mountains  | Slide Mtn         | OR    | 42.684750   | -120.736133 | 1960                                | 2015                          | Millar unpublished                         | 2010                           |                           | Millar unpublished                         |
| SLD-2        | Fremont Mountains  | Slide Mtn         | OR    | 42.685600   | -120.740000 | 1935                                | 2015                          | Millar unpublished                         | 2010                           |                           | Millar unpublished                         |
| FB-BS-1      | Mosquito Mountains | Barrel Springs    | NV    | 41.907817   | -119.962883 | 1667                                | 2015                          | Millar unpublished                         | 2010                           |                           | Millar and Westfall 2010                   |
| BH-BrptCyn-1 | Bodie Mountains    | Bridgeport Cyn    | CA    | 38.132983   | -119.077583 | 2513                                | 2011                          | Millar unpublished                         | 2007                           |                           | Millar et al. 2014                         |
| BH-BrptCyn-2 | Bodie Mountains    | Bridgeport Cyn    | CA    | 38.133083   | -119.078367 | 2512                                | 2011                          | Millar unpublished                         | 2007                           |                           | Millar unpublished                         |
| BH-BrptCyn-3 | Bodie Mountains    | Bridgeport Cyn    | CA    | 38.132750   | -119.078417 | 2518                                | 2011                          | Millar unpublished                         | 2007                           |                           | Millar unpublished                         |
| BH-BrptCyn-4 | Bodie Mountains    | Bridgeport Cyn    | CA    | 38.136350   | -119.081383 | 2519                                | 2011                          | Millar unpublished                         | 2007                           |                           | Millar unpublished                         |
| MasCh-4      | Bodie Mountains    | Chemung Mine area | CA    | 38.350550   | -119.147400 | 2526                                | 2016                          | Millar unpublished                         | 2008                           | 2007                      | Millar unpublished                         |
| AurPk-1      | Bodie Mountains    | Aurora Pk         | NV    | 38.280367   | -118.856817 | 2552                                | 2011                          | Millar unpublished                         | 2008                           |                           | Millar unpublished                         |
| MasN-1       | Bodie Mountains    | Masonic Mtn N     | NV    | 38.358400   | -119.144533 | 2463                                | 2011                          | Millar et al. 2013                         |                                | 2007                      | Millar et al. 2014                         |
| MasN-2       | Bodie Mountains    | Masonic Mtn N     | NV    | 38.358400   | -119.144150 | 2464                                | 2011                          | Millar et al. 2013                         |                                | 2007                      | Millar et al. 2014                         |
| MasN-5       | Bodie Mountains    | Masonic Mtn N     | NV    | 38.358550   | -119.137733 | 2495                                | 2011                          | Millar et al. 2013                         |                                | 2007                      | Millar et al. 2014                         |
| Bodie-Low-1  | Bodie Mountains    | Clearwater Creek  | CA    | 38.164483   | -119.149933 | 2202                                | 2015                          | Millar et al. 2013                         | 2009                           | 2007                      | Millar unpublished; Millar et al. 2014     |
| Termo-1      | Madeline Uplands   | Termo Buttes      | CA    | 40.857333   | -120.488683 | 1628                                | 2014                          | Millar unpublished                         | 2011                           | 1924                      | Millar et al. 2014, Howell 1924            |
| Termo-2      | Madeline Uplands   | Termo Buttes      | CA    | 40.857400   | -120.488817 | 1630                                | 2014                          | Millar unpublished                         | 2011                           | 1924                      | Millar et al. 2014, Howell 1924            |
| Kelty-3      | Glass Mountains    | Kelty Ridge       | CA    | 37.746350   | -118.653800 | 3037                                | 2016                          | Millar unpublished                         | 2007                           |                           | Millar et al. 2014                         |
| Kelty-4      | Glass Mountains    | Kelty Ridge       | CA    | 37.746133   | -118.653617 | 3039                                | 2016                          | Millar unpublished                         | 2007                           |                           | Millar et al. 2014                         |
| CPLower-1    | Wassuk Mountains   | South Canyon      | NV    | 38.441150   | -118.762733 | 2718                                | 2013                          | Millar unpublished                         | 2007                           |                           | Millar unpublished                         |
| CPLower-2    | Wassuk Mountains   | South Canyon      | NV    | 38.441100   | -118.762667 | 2730                                | 2013                          | Millar unpublished                         | 2007                           |                           | Millar unpublished                         |
| BRCr-1       | Bodie Mountains    | Mt Biedeman       | CA    | 38.147983   | -119.069450 | 2610                                | 2016                          | Millar unpublished                         | 2013                           |                           | Millar unpublished                         |
| BRCr-2       | Bodie Mountains    | Mt Biedeman       | CA    | 38.147800   | -119.069683 | 2602                                | 2016                          | Millar unpublished                         | 2013                           |                           | Millar unpublished                         |
| BRCr-3       | Bodie Mountains    | Mt Biedeman       | CA    | 38.147667   | -119.069900 | 2596                                | 2016                          | Millar unpublished                         | 2013                           |                           | Millar unpublished                         |
| BRCr-4       | Bodie Mountains    | Mt Biedeman       | CA    | 38.147600   | -119.069917 | 2593                                | 2016                          | Millar unpublished                         | 2013                           |                           | Millar unpublished                         |
| BRCr-5       | Bodie Mountains    | Mt Biedeman       | CA    | 38.147750   | -119.069500 | 2608                                | 2016                          | Millar unpublished                         | 2013                           |                           | Millar unpublished                         |
| BRCr-6       | Bodie Mountains    | Mt Biedeman       | CA    | 38.147533   | -119.068550 | 2653                                | 2016                          | Millar unpublished                         | 2013                           |                           | Millar unpublished                         |
| BRCr-7       | Bodie Mountains    | Mt Biedeman       | CA    | 38.148250   | -119.068450 | 2653                                | 2016                          | Millar unpublished                         | 2013                           |                           | Millar unpublished                         |
| BRCr-8       | Bodie Mountains    | Mt Biedeman       | CA    | 38.148300   | -119.067950 | 2666                                | 2016                          | Millar unpublished                         | 2013                           |                           | Millar unpublished                         |
| BRCr-9       | Bodie Mountains    | Mt Biedeman       | CA    | 38.148967   | -119.068433 | 2648                                | 2016                          | Millar unpublished                         | 2013                           |                           | Millar unpublished                         |
| BRCr-10      | Bodie Mountains    | Mt Biedeman       | CA    | 38.148883   | -119.068517 | 2645                                | 2016                          | Millar unpublished                         | 2013                           |                           | Millar unpublished                         |
| BRCr-11      | Bodie Mountains    | Mt Biedeman       | CA    | 38.148933   | -119.068600 | 2640                                | 2016                          | Millar unpublished                         | 2013                           |                           | Millar unpublished                         |

|           |                    |                                     |    |           |             |                         |           |                                   |           |           |                                                         |
|-----------|--------------------|-------------------------------------|----|-----------|-------------|-------------------------|-----------|-----------------------------------|-----------|-----------|---------------------------------------------------------|
| BRCr-12   | Bodie Mountains    | Mt Biedeman                         | CA | 38.148900 | -119.068567 | 2640                    | 2016      | Millar unpublished                | 2013      |           | Millar unpublished                                      |
| BRCr-13   | Bodie Mountains    | Mt Biedeman                         | CA | 38.148550 | -119.068700 | 2625                    | 2016      | Millar unpublished                | 2013      |           | Millar unpublished                                      |
| Slide-1   | Fremont Mountains  | Slide Mtn                           | OR | 42.685067 | -120.736817 | 1964                    | 2015      | Millar unpublished                | 2010      |           | Millar unpublished                                      |
| Slide-2   | Fremont Mountains  | Slide Mtn                           | OR | 42.684017 | -120.736550 | 1981                    | 2015      | Millar unpublished                | 2010      |           | Millar unpublished                                      |
| Slide-3   | Fremont Mountains  | Slide Mtn                           | OR | 42.684050 | -120.736533 | 2010                    | 2015      | Millar unpublished                | 2010      |           | Millar unpublished                                      |
| Slide-4   | Fremont Mountains  | Slide Mtn                           | OR | 42.683883 | -120.736333 | 2007                    | 2015      | Millar unpublished                | 2010      |           | Millar unpublished                                      |
| Slide-5   | Fremont Mountains  | Slide Mtn                           | OR | 42.684617 | -120.736250 | 1945                    | 2015      | Millar unpublished                | 2010      |           | Millar unpublished                                      |
| KELJr-1   | Glass Mountains    | Kelty Ridge                         | CA | 37.746310 | -118.653480 | 3035                    | 2016      | Millar unpublished                | 2011      |           | Millar unpublished                                      |
| KELJr-2   | Glass Mountains    | Kelty Ridge                         | CA | 37.746710 | -118.653920 | 3023                    | 2016      | Millar unpublished                | 2011      |           | Millar unpublished                                      |
| KELETTE-1 | Glass Mountains    | Kelty Ridge                         | CA | 37.748490 | -118.653700 | 3027                    | 2016      | Millar unpublished                | 2011      |           | Millar unpublished                                      |
| 965       | Bodie Mountains    | Masonic Mtn East                    | CA | 38.348483 | -119.127717 | 2759                    | 2015      | Millar unpublished                |           | 2012      | Millar et al. 2013                                      |
| 966       | Bodie Mountains    | Masonic Mtn East                    | CA | 38.348117 | -119.127750 | 2754                    | 2015      | Millar unpublished                |           | 2012      | Millar et al. 2013                                      |
| 967       | Bodie Mountains    | Masonic Mtn East                    | CA | 38.348450 | -119.128133 | 2747                    | 2015      | Millar unpublished                |           | 2012      | Millar et al. 2013                                      |
| 968       | Bodie Mountains    | Masonic Mtn East                    | CA | 38.348583 | -119.128017 | 2759                    | 2015      | Millar unpublished                |           | 2012      | Millar et al. 2013                                      |
| 705       | Bodie Mountains    | New York Hill, Serita Mine          | CA | 38.359667 | -119.126564 | 2582                    | 2015      | Millar unpublished                |           | 2012      | Millar et al. 2013                                      |
| 706       | Bodie Mountains    | New York Hill, Serita Mine          | CA | 38.359450 | -119.126383 | 2590                    | 2015      | Millar unpublished                |           | 2012      | Millar et al. 2013                                      |
| 713       | Bodie Mountains    | NY Hill                             | NV | 38.359900 | -119.125350 | 2594                    | 2015      | Millar unpublished                |           | 2011      | Millar et al. 2013                                      |
| 715       | Bodie Mountains    | NY Hill                             | NV | 38.360150 | -119.125183 | 2591                    | 2015      | Millar unpublished                |           | 2011      | Millar et al. 2013                                      |
| LN1       | Bodie Mountains    | Bodie Mountain                      | CA | 38.227000 | -119.070000 | 3106                    | 2016      | Nichols et al. 2016,              | 2008      | 2003      | Nichols 2010                                            |
| LN3       | Bodie Mountains    | S Bodie HistoricPark                | CA | 38.198000 | -119.010000 | 2614                    | 2016      | Nichols et al. 2016,              | 2006      | 2005      | Smith and Nagy 2015                                     |
| LN4       | Bodie Mountains    | Chemung Mine                        | CA | 38.349948 | -119.149084 | 2506                    | 2016      | Nichols et al. 2016               |           | 2008      | Millar et al. 2013                                      |
| LN5       | Bodie Mountains    | Masonic Mountain East               | CA | 38.348400 | -119.127800 | 2773                    | 2016      | Nichols et al. 2016               |           | 2012      | Millar et al. 2013                                      |
| LN6       | Bodie Mountains    | Serita Mine, New York Hill          | CA | 38.361200 | -119.126400 | 2601                    | 2016      | Nichols et al. 2016               |           | 2011      | Millar et al. 2014; Stewart et al. 2015                 |
| Ex1       | Pine Forest Range  | Duffer Peak                         | NV | 41.650000 | -118.740000 | 2560                    | 2007      | Beever et al. 2011                | 1999      | 1935      | Beever et al. 2011; Hall 1946                           |
| Ex2       | Desatoya Range     | Smiths Creek                        | NV | 39.350000 | -117.680000 | 2286                    | 2007      | Beever et al. 2011                | 1999      | 1934      | Beever et al. 2011; Hall 1946                           |
| Ex3       | Idaho Canyon Range | Summit Lake                         | NV | 41.610000 | -119.070000 | 1798                    | 2007      | Beever et al. 2011                | 1999      | 1936      | Beever et al. 2011; Hall 1946                           |
| Ex4       | Mosquito Mountains | Fort Bidwell                        | NV | 41.900000 | -119.960000 | 1737                    | 2007      | Beever et al. 2011                | 1999      | 1941      | Beever et al. 2011; Hall 1946                           |
| Ex5       | Hart Mountains     | 20 mi NE Adel                       | OR | 42.400000 | -119.640000 | 1760                    | 2007      | Beever et al. 2011                | 1999      | 1913      | Beever et al. 2011; Verts and Callaway 1998             |
| Ex6       | Fremont Mountains  | Thomas Creek Ranger Stn             | OR | 42.400000 | -120.600000 | 1798                    | 2007      | Beever et al. 2011                | 1999      | 1925      | Beever et al. 2011; Verts and Callaway 1998             |
| Ex7       | White Mountains    | Pinchot Creek                       | NV | 37.920000 | -118.290000 | 2499                    | 2008      | Beever et al. 2011                | 2003      | 1999      | Beever et al. 2011; Hall 1946                           |
| Ex8       | Monitor Range      | Greenmonster Canyon                 | NV | 38.750000 | -116.570000 | 2476                    | 2007      | Beever et al. 2011                | 2003      | 1999      | Beever et al. 2011; Hall 1946                           |
| Ex9       | Shoshone Mountains | Peterson Creek <sup>a</sup>         | NV | 39.160000 | -117.490000 | 2225                    | 2007      | Beever et al. 2011                | 2003      | 1999      | Beever et al. 2011; Hall 1946                           |
| Ex10      | White Pine Range   | Red Mountain                        | NV | 38.900000 | -115.340000 | 2701                    | 2007      | Beever et al. 2011                | 2003      | 1999      | Beever et al. 2011; Lawlor 1998                         |
| Ex11      | White Pine Range   | Currant Mountain                    | NV | 38.910000 | -115.400000 | ~2753 <sup>b</sup>      | na        | Wilkening et al. 2011             | ~2011     | na        | Wilkening et al. 2011                                   |
| P192      | Cascade Range      | Bly Canal, Eagle Lk                 | CA | 40.610000 | -120.730000 | 2009, 1585 <sup>c</sup> | 2014      | Beever et al. 2016                | 2009      | 1925      | Beever et al. 2016; Howell 1924                         |
| Ex12      | Cascade Range      | Eagle Lake Field Stn                | CA | na        | na          | 1615                    | 2010      | Massing 2012                      | 2009      | 1924-1929 | Massing 2012; Grinnell et al. 1930                      |
| Ex13      | Madeline Uplands   | 4 mi SW McDonald Pk                 | CA | 40.910000 | -120.460000 | 1632                    | 2014      | Beever et al. 2016                | 2004-2012 | 1924      | Stewart et al. 2015; Howell 1924                        |
| Ex14      | Madeline Uplands   | McDonald Peak, SE slope             | CA | na        | na          | 1768                    | 2010      | Massing 2012                      | 2009      | 1924-1929 | Massing 2012; Grinnell et al. 1930                      |
| Ex15      | Madeline Uplands   | 3 mi NE Horse Lake                  | CA | 40.710000 | -120.430000 | 1996                    | 2010      | Massing 2012; Stewart et al. 2015 | 2009      | 1924-1929 | Massing 2012; Stewart et al. 2015; Grinnell et al. 1930 |
| Ex16      | Bodie Mountains    | Bodie Mountain                      | CA | 38.230000 | -119.070000 | na                      | 2004-2012 | Stewart et al. 2015               | na        | 1897-2000 | Stewart et al. 2015                                     |
| Ex17      | Bodie Mountains    | Potato Mountain                     | CA | 38.230000 | -119.090000 | na                      | 2004-2012 | Stewart et al. 2015               | na        | 1897-2000 | Stewart et al. 2015                                     |
| Ex18      | Bodie Mountains    | S Bodie                             | CA | 38.200000 | -119.010000 | na                      | 2004-2012 | Stewart et al. 2015               | na        | 1897-2000 | Stewart et al. 2015                                     |
| Ex19      | Warner Mountains   | Vicinity of Sugar Hill              | CA | 41.810000 | -120.340000 | 2203                    | 2015      | Beever et al. 2016                | 2014      | 1910      | Beever et al. 2016; Howell 1924                         |
| Ex20      | Toiyabe Range      | Wisconsin Creek                     | NV | 38.950000 | -117.260000 | 2160                    | 2014      | Beever et al. 2016                | 2012      | 1932      | Beever et al. 2016; Howell 1924                         |
| Ex21      | Warner Mountains   | Warner Mountains                    | CA | 41.590000 | -120.240000 | 1811                    | 2015      | Beever et al. 2016                | 2014      | 1935      | Beever et al. 2016; Howell 1924                         |
| Ex22      | Warner Mountains   | Highgrade Springs area <sup>d</sup> | CA | 41.950000 | -120.230000 | 2326                    | 2015      | Beever et al. 2016                | 2014      | 1932      | Beever et al. 2016; Howell 1924                         |

<sup>a</sup> Estimated coordinates; original publications incorrectly report 39.19<sup>o</sup>, -118.30<sup>o</sup>

<sup>b</sup> Mean elevation of sensors placed in pika habitat

<sup>c</sup> Beever et al. 2016 give slightly differing coordinates/elevations for these closely adjacent sites

<sup>d</sup> Same coordinates and survey dates are indicated in Beever et al.2016 as extirpated and extant

<sup>e</sup> The occurrence of pikas, historic or modern, in the White Pine Range has been questioned; we include the records as extirpated until further verification

na, not available
