# Supplementary material
Source: publisher figshare collection journal article supplement (https://tandf.figshare.com/articles/dataset/_/6203678)
Supplement: Supplementary file 2 [file 1]

# Appendix 3: Master Database -- Extant Great Basin Pika Sites, Published and Unpublished Sources

9/5/17

| ID | Mountain Range  | Location       | State | <u>Coordinates</u> |              | Elevation<br>Site Specific<br>or Mean<br>(m) | <u>Elevation</u> |             | Aspect<br>(deg) <sup>a</sup> | Most<br>Recent<br>Survey<br>Year <sup>b</sup> | Citation (Published);<br>Source (Unpublished) <sup>c</sup> |
|----|-----------------|----------------|-------|--------------------|--------------|----------------------------------------------|------------------|-------------|------------------------------|-----------------------------------------------|------------------------------------------------------------|
|    |                 |                |       | Latitude           | Longitude    |                                              | Low<br>(m)       | High<br>(m) |                              |                                               |                                                            |
| 7  | Sierra Nevada   | Lee Vining Cr  | CA    | 37.9644333         | -119.3024167 | 3436                                         | na               | na          | 119                          | 2016                                          | Millar Unpublished                                         |
| 8  | Sierra Nevada   | Lee Vining Cr  | CA    | 37.9814333         | -119.2993333 | 3164                                         | na               | na          | 148                          | 2016                                          | Millar Unpublished                                         |
| 9  | Sierra Nevada   | Lee Vining Cr  | CA    | 37.9763833         | -119.3113000 | 3284                                         | na               | na          | 167                          | 2016                                          | Millar Unpublished                                         |
| 10 | Sierra Nevada   | Lee Vining Cr  | CA    | 37.9776833         | -119.2966500 | 3091                                         | na               | na          | 108                          | 2016                                          | Millar Unpublished                                         |
| 11 | Sierra Nevada   | Lee Vining Cr  | CA    | 37.9772167         | -119.2920000 | 3100                                         | na               | na          | 354                          | 2016                                          | Millar Unpublished                                         |
| 12 | Sierra Nevada   | Lee Vining Cr  | CA    | 37.9760000         | -119.3106000 | 3287                                         | na               | na          | 145                          | 2016                                          | Millar Unpublished                                         |
| 13 | Sierra Nevada   | Dana Plateau   | CA    | 37.9180000         | -119.2310500 | 3364                                         | na               | na          | 263                          | 2016                                          | Millar Unpublished                                         |
| 14 | Sierra Nevada   | Dana Plateau   | CA    | 37.9239667         | -119.2366000 | 3304                                         | na               | na          | 256                          | 2016                                          | Millar Unpublished                                         |
| 15 | Sierra Nevada   | Mammoth Cr     | CA    | 37.5682833         | -118.9730833 | 3147                                         | na               | na          | 34                           | 2011                                          | Millar Unpublished                                         |
| 16 | Sierra Nevada   | Mammoth Cr     | CA    | 37.5674833         | -118.9734167 | 3168                                         | na               | na          | 45                           | 2011                                          | Millar Unpublished                                         |
| 17 | Sierra Nevada   | Mammoth Cr     | CA    | 37.5680000         | -118.9724667 | 3170                                         | na               | na          | 58                           | 2011                                          | Millar Unpublished                                         |
| 18 | Sierra Nevada   | Mammoth Cr     | CA    | 37.5678667         | -118.9726167 | 3133                                         | na               | na          | 58                           | 2011                                          | Millar Unpublished                                         |
| 19 | Sierra Nevada   | Mammoth Cr     | CA    | 37.5685833         | -118.9770667 | 3196                                         | na               | na          | 95                           | 2011                                          | Millar Unpublished                                         |
| 20 | Sierra Nevada   | Mammoth Cr     | CA    | 37.5670167         | -118.9743333 | 3171                                         | na               | na          | 12                           | 2011                                          | Millar Unpublished                                         |
| 21 | Sierra Nevada   | Mammoth Cr     | CA    | 37.5672000         | -118.9745833 | 3170                                         | na               | na          | 19                           | 2011                                          | Millar Unpublished                                         |
| 22 | Sierra Nevada   | Mammoth Cr     | CA    | 37.5671500         | -118.9767833 | 3188                                         | na               | na          | 55                           | 2011                                          | Millar Unpublished                                         |
| 23 | Sierra Nevada   | Mammoth Cr     | CA    | 37.5689000         | -118.9728333 | 3120                                         | na               | na          | 19                           | 2011                                          | Millar Unpublished                                         |
| 24 | Sierra Nevada   | Mammoth Cr     | CA    | 37.5680167         | -118.9771333 | 3193                                         | na               | na          | 64                           | 2011                                          | Millar Unpublished                                         |
| 25 | Sierra Nevada   | Mammoth Cr     | CA    | 37.5676333         | -118.9770500 | 3187                                         | na               | na          | 28                           | 2011                                          | Millar Unpublished                                         |
| 26 | Sierra Nevada   | Mammoth Cr     | CA    | 37.5695333         | -118.9737833 | 3083                                         | na               | na          | 1                            | 2011                                          | Millar Unpublished                                         |
| 27 | Sierra Nevada   | Mammoth Cr     | CA    | 37.5687833         | -118.9760667 | 3154                                         | na               | na          | 37                           | 2011                                          | Millar Unpublished                                         |
| 28 | Sierra Nevada   | Mammoth Cr     | CA    | 37.5684000         | -118.9765333 | 3184                                         | na               | na          | 65                           | 2011                                          | Millar Unpublished                                         |
| 29 | Sierra Nevada   | Mammoth Cr     | CA    | 37.5679500         | -118.9751167 | 3169                                         | na               | na          | 108                          | 2011                                          | Millar Unpublished                                         |
| 30 | Sierra Nevada   | Mammoth Cr     | CA    | 37.5676000         | -118.9736333 | 3168                                         | na               | na          | 35                           | 2011                                          | Millar Unpublished                                         |
| 31 | Sierra Nevada   | Mammoth Cr     | CA    | 37.5676833         | -118.9744000 | 3176                                         | na               | na          | 33                           | 2011                                          | Millar Unpublished                                         |
| 32 | Sierra Nevada   | Mammoth Cr     | CA    | 37.5678333         | -118.9745500 | 3174                                         | na               | na          | 57                           | 2011                                          | Millar Unpublished                                         |
| 33 | Sierra Nevada   | Mammoth Cr     | CA    | 37.5681833         | -118.9744333 | 3164                                         | na               | na          | 32                           | 2011                                          | Millar Unpublished                                         |
| 34 | Sierra Nevada   | Mammoth Cr     | CA    | 37.5676167         | -118.9741667 | 3162                                         | na               | na          | 33                           | 2011                                          | Millar Unpublished                                         |
| 35 | Sierra Nevada   | Mammoth Cr     | CA    | 37.5689500         | -118.9728167 | 3105                                         | na               | na          | 19                           | 2011                                          | Millar Unpublished                                         |
| 36 | Sierra Nevada   | Mammoth Cr     | CA    | 37.5693167         | -118.9738833 | 3093                                         | na               | na          | 7                            | 2011                                          | Millar Unpublished                                         |
| 37 | Sierra Nevada   | Mammoth Cr     | CA    | 37.5670667         | -118.9764500 | 3186                                         | na               | na          | 55                           | 2011                                          | Millar Unpublished                                         |
| 38 | White Mountains | S Main Plateau | CA    | 37.5686333         | -118.2262500 | 3546                                         | na               | na          | 71                           | 2007                                          | Millar Unpublished                                         |
| 39 | White Mountains | S Main Plateau | CA    | 37.5689000         | -118.2262000 | 3541                                         | na               | na          | 125                          | 2007                                          | Millar Unpublished                                         |
| 40 | White Mountains | Wyman Cyn      | CA    | 37.4318333         | -118.1010333 | 2442                                         | na               | na          | 188                          | 2016                                          | Millar Unpublished                                         |
| 41 | White Mountains | Wyman Cyn      | CA    | 37.4413000         | -118.1765500 | 2893                                         | na               | na          | 169                          | 2016                                          | Millar Unpublished                                         |
| 42 | White Mountains | Boundary Pk    | NV    | 37.8569333         | -118.3285167 | 3210                                         | na               | na          | 317                          | 2013                                          | Millar Unpublished                                         |
| 43 | White Mountains | Boundary Pk    | NV    | 37.8568500         | -118.3274500 | 3248                                         | na               | na          | 327                          | 2013                                          | Millar Unpublished                                         |
| 44 | White Mountains | Boundary Pk    | NV    | 37.8542667         | -118.3154833 | 3292                                         | na               | na          | 334                          | 2013                                          | Millar Unpublished                                         |
| 45 | White Mountains | S Main Plateau | CA    | 37.4920167         | -118.1731000 | 3080                                         | na               | na          | 341                          | 2014                                          | Millar Unpublished                                         |
| 46 | Sierra Nevada   | Robinson Cyn   | CA    | 38.1142333         | -119.3731833 | 2642                                         | na               | na          | 283                          | 2012                                          | Millar Unpublished                                         |
| 47 | Sierra Nevada   | Gibbs Cyn      | CA    | 37.8981833         | -119.1897000 | 3071                                         | na               | na          | 22                           | 2014                                          | Millar Unpublished                                         |
| 48 | Sierra Nevada   | Gibbs Cyn      | CA    | 37.8974500         | -119.1925000 | 3139                                         | na               | na          | 24                           | 2014                                          | Millar Unpublished                                         |
| 49 | Sierra Nevada   | Gibbs Cyn      | CA    | 37.8969833         | -119.1952333 | 3168                                         | na               | na          | 38                           | 2015                                          | Millar Unpublished                                         |

|    |                  |                 |    |            |              |      |    |    |     |      |                    |
|----|------------------|-----------------|----|------------|--------------|------|----|----|-----|------|--------------------|
| 50 | Sierra Nevada    | Gibbs Cyn       | CA | 37.8986167 | -119.1837667 | 2900 | na | na | 353 | 2016 | Millar Unpublished |
| 51 | Sierra Nevada    | Gibbs Cyn       | CA | 37.8970667 | -119.1947500 | 3172 | na | na | 32  | 2014 | Millar Unpublished |
| 52 | Sierra Nevada    | Gibbs Cyn       | CA | 37.9035667 | -119.1708333 | 2813 | na | na | 17  | 2015 | Millar Unpublished |
| 53 | Sierra Nevada    | Gibbs Cyn       | CA | 37.9040000 | -119.1710500 | 2818 | na | na | 36  | 2015 | Millar Unpublished |
| 54 | Sierra Nevada    | Granite Lks     | CA | 37.9344833 | -119.2782167 | 3402 | na | na | 334 | 2013 | Millar Unpublished |
| 55 | Sierra Nevada    | Granite Lks     | CA | 37.9313167 | -119.2755833 | 3356 | na | na | 87  | 2013 | Millar Unpublished |
| 56 | Sierra Nevada    | Granite Lks     | CA | 37.9312667 | -119.2756000 | 3359 | na | na | 87  | 2013 | Millar Unpublished |
| 57 | Sierra Nevada    | Granite Lks     | CA | 37.9195333 | -119.2679833 | 3208 | na | na | 271 | 2013 | Millar Unpublished |
| 58 | Sierra Nevada    | Saddlebag Lk    | CA | 37.9652167 | -119.2745667 | 3072 | na | na | 149 | 2016 | Millar Unpublished |
| 59 | Sierra Nevada    | Saddlebag Lk    | CA | 37.9674167 | -119.2743167 | 3078 | na | na | 67  | 2016 | Millar Unpublished |
| 60 | Sierra Nevada    | Tioga Tarns     | CA | 37.9328500 | -119.2514667 | 2943 | na | na | 100 | 2015 | Millar Unpublished |
| 61 | Sierra Nevada    | Ellery Lk       | CA | 37.9300500 | -119.2298333 | 3095 | na | na | 1   | 2015 | Millar Unpublished |
| 62 | Sierra Nevada    | Ellery Lk       | CA | 37.9289333 | -119.2286000 | 3163 | na | na | 318 | 2015 | Millar Unpublished |
| 63 | Sierra Nevada    | Duck Pass       | CA | 37.5645333 | -118.9649000 | 3070 | na | na | 214 | 2011 | Millar Unpublished |
| 64 | Sierra Nevada    | Duck Pass       | CA | 37.5632000 | -118.9644333 | 3130 | na | na | 238 | 2011 | Millar Unpublished |
| 65 | Sierra Nevada    | Duck Pass       | CA | 37.5603833 | -118.9644333 | 3213 | na | na | 322 | 2011 | Millar Unpublished |
| 66 | Sierra Nevada    | Tamarack Cyn    | CA | 38.1357667 | -119.3139333 | 2867 | na | na | 299 | 2014 | Millar Unpublished |
| 67 | Sierra Nevada    | Tamarack Cyn    | CA | 38.1302500 | -119.3138667 | 2901 | na | na | 284 | 2014 | Millar Unpublished |
| 68 | Sierra Nevada    | Tamarack Cyn    | CA | 38.1228667 | -119.3160000 | 2943 | na | na | 326 | 2014 | Millar Unpublished |
| 69 | Sierra Nevada    | Tamarack Cyn    | CA | 38.1148667 | -119.3177000 | 3061 | na | na | 307 | 2014 | Millar Unpublished |
| 70 | Sierra Nevada    | Tamarack Cyn    | CA | 38.1113667 | -119.3165333 | 3126 | na | na | 295 | 2014 | Millar Unpublished |
| 71 | Sierra Nevada    | Tamarack Cyn    | CA | 38.1118500 | -119.3193833 | 3079 | na | na | 60  | 2014 | Millar Unpublished |
| 72 | Sierra Nevada    | Tamarack Cyn    | CA | 38.1119500 | -119.3276667 | 3277 | na | na | 96  | 2014 | Millar Unpublished |
| 73 | Sierra Nevada    | Tamarack Cyn    | CA | 38.1035667 | -119.3316667 | 3439 | na | na | 79  | 2014 | Millar Unpublished |
| 74 | Wassuk Mountains | Cory Pk         | NV | 38.4416000 | -118.7630333 | 2680 | na | na | 337 | 2009 | Millar Unpublished |
| 75 | Wassuk Mountains | Cory Pk         | NV | 38.4402667 | -118.7662333 | 2770 | na | na | 40  | 2009 | Millar Unpublished |
| 76 | Wassuk Mountains | Cory Pk         | Nv | 38.4652167 | -118.7702333 | 2539 | na | na | 346 | 2009 | Millar Unpublished |
| 77 | Wassuk Mountains | Mt Grant        | NV | 38.5610833 | -118.7968333 | 3153 | na | na | 180 | 2014 | Millar Unpublished |
| 78 | Sierra Nevada    | Lake Cyn        | CA | 38.0183333 | -119.2418833 | 2670 | na | na | 313 | 2016 | Millar Unpublished |
| 79 | Sierra Nevada    | Lake Cyn        | CA | 37.9947000 | -119.2465500 | 3005 | na | na | 329 | 2016 | Millar Unpublished |
| 80 | Sierra Nevada    | Lake Cyn        | CA | 37.9967833 | -119.2468500 | 2932 | na | na | 321 | 2014 | Millar Unpublished |
| 81 | Sierra Nevada    | Lake Cyn        | CA | 37.9968333 | -119.2418667 | 3094 | na | na | 296 | 2014 | Millar Unpublished |
| 82 | Sierra Nevada    | Lake Cyn        | CA | 38.0017500 | -119.2484333 | 2901 | na | na | 97  | 2016 | Millar Unpublished |
| 83 | Sierra Nevada    | Lake Cyn        | CA | 37.9973167 | -119.2512167 | 2954 | na | na | 113 | 2013 | Millar Unpublished |
| 84 | Sierra Nevada    | Mt Dunderberg   | CA | 38.0764833 | -119.2625833 | 3170 | na | na | 79  | 2016 | Millar Unpublished |
| 85 | Sierra Nevada    | Mt Dunderberg   | CA | 38.0655333 | -119.2651500 | 3656 | na | na | 109 | 2016 | Millar Unpublished |
| 86 | Sierra Nevada    | Mt Dunderberg   | CA | 38.0673833 | -119.2662500 | 3554 | na | na | 359 | 2016 | Millar Unpublished |
| 87 | Sierra Nevada    | Mt Dunderberg   | CA | 38.0711167 | -119.2676500 | 3384 | na | na | 8   | 2015 | Millar Unpublished |
| 88 | Sierra Nevada    | Mt Dunderberg   | CA | 38.0671500 | -119.2598833 | 3513 | na | na | 76  | 2016 | Millar Unpublished |
| 89 | Sierra Nevada    | Mt Dunderberg   | CA | 38.0667333 | -119.2608833 | 3556 | na | na | 57  | 2016 | Millar Unpublished |
| 90 | Sierra Nevada    | Kavanaugh Crest | CA | 38.0735167 | -119.2737167 | 3360 | na | na | 18  | 2016 | Millar Unpublished |
| 91 | Sierra Nevada    | Kavanaugh Crest | CA | 38.0773167 | -119.2782333 | 3352 | na | na | 112 | 2016 | Millar Unpublished |
| 92 | Sierra Nevada    | Virginia Lks    | CA | 38.0443500 | -119.2627667 | 3047 | na | na | 313 | 2016 | Millar Unpublished |
| 93 | Sierra Nevada    | Virginia Lks    | CA | 38.0518667 | -119.2688833 | 3024 | na | na | 203 | 2016 | Millar Unpublished |
| 94 | Sierra Nevada    | Virginia Lks    | CA | 38.0521667 | -119.2728000 | 3063 | na | na | 144 | 2015 | Millar Unpublished |
| 95 | Sierra Nevada    | Virginia Lks    | CA | 38.0481500 | -119.2853333 | 3172 | na | na | 137 | 2014 | Millar Unpublished |
| 96 | Sierra Nevada    | Virginia Lks    | CA | 38.0459333 | -119.2900833 | 3259 | na | na | 133 | 2016 | Millar Unpublished |
| 97 | Sierra Nevada    | Virginia Lks    | CA | 38.0519000 | -119.2691500 | 3013 | na | na | 210 | 2016 | Millar Unpublished |
| 98 | Sierra Nevada    | Virginia Lks    | CA | 38.0466667 | -119.2771833 | 3120 | na | na | 338 | 2015 | Millar Unpublished |

|     |               |                            |    |            |              |      |    |    |     |      |                    |
|-----|---------------|----------------------------|----|------------|--------------|------|----|----|-----|------|--------------------|
| 99  | Sierra Nevada | Virginia Lks               | CA | 38.0453333 | -119.2777000 | 3155 | na | na | 350 | 2015 | Millar Unpublished |
| 100 | Sierra Nevada | Virginia Lks               | CA | 38.0453500 | -119.2787167 | 3163 | na | na | 27  | 2015 | Millar Unpublished |
| 101 | Sierra Nevada | Virginia Lks               | CA | 38.0445667 | -119.2802500 | 3184 | na | na | 11  | 2015 | Millar Unpublished |
| 102 | Sierra Nevada | Virginia Lks               | CA | 38.0435500 | -119.2820333 | 3193 | na | na | 347 | 2015 | Millar Unpublished |
| 103 | Sierra Nevada | Virginia Lks               | CA | 38.0418667 | -119.2944167 | 3366 | na | na | 47  | 2016 | Millar Unpublished |
| 104 | Sierra Nevada | Upper Green Cr             | CA | 38.0416667 | -119.2983500 | 3292 | na | na | 257 | 2016 | Millar Unpublished |
| 105 | Sierra Nevada | Upper Green Cr             | CA | 38.0424333 | -119.2997333 | 3294 | na | na | 26  | 2016 | Millar Unpublished |
| 106 | Sierra Nevada | Upper Green Cr             | CA | 38.0429833 | -119.3009000 | 3245 | na | na | 299 | 2016 | Millar Unpublished |
| 107 | Sierra Nevada | Mt Excelsior               | CA | 38.0434167 | -119.3064000 | 3222 | na | na | 49  | 2014 | Millar Unpublished |
| 108 | Sierra Nevada | Mt Excelsior               | CA | 38.0422167 | -119.3049500 | 3256 | na | na | 329 | 2012 | Millar Unpublished |
| 109 | Sierra Nevada | Mt Excelsior               | CA | 38.0403333 | -119.3071167 | 3314 | na | na | 57  | 2013 | Millar Unpublished |
| 110 | Sierra Nevada | Mt Excelsior               | CA | 38.0405333 | -119.3057667 | 3299 | na | na | 12  | 2014 | Millar Unpublished |
| 111 | Sierra Nevada | Virginia Cyn               | CA | 38.0632500 | -119.2422500 | 2893 | na | na | 157 | 2016 | Millar Unpublished |
| 112 | Sierra Nevada | Virginia Cyn               | CA | 38.0522667 | -119.2687000 | 3043 | na | na | 203 | 2015 | Millar Unpublished |
| 113 | Sierra Nevada | Mt Excelsior Cirque        | CA | 38.0426000 | -119.3021500 | 3267 | na | na | 10  | 2013 | Millar Unpublished |
| 114 | Sierra Nevada | Mt Excelsior Cirque        | CA | 38.0398000 | -119.3057333 | 3310 | na | na | 0   | 2014 | Millar Unpublished |
| 115 | Sierra Nevada | Virginia Cyn               | CA | 38.0522833 | -119.2686833 | 3018 | na | na | 203 | 2016 | Millar Unpublished |
| 116 | Sierra Nevada | Virginia Cyn               | CA | 38.0551667 | -119.2754333 | 3179 | na | na | 183 | 2016 | Millar Unpublished |
| 117 | Sierra Nevada | Virginia Cyn               | CA | 38.0558667 | -119.2609667 | 3205 | na | na | 166 | 2016 | Millar Unpublished |
| 118 | Sierra Nevada | Virginia Cyn               | CA | 38.0565500 | -119.2769667 | 3228 | na | na | 198 | 2016 | Millar Unpublished |
| 119 | Sierra Nevada | Virginia Cyn               | CA | 38.0595000 | -119.2789000 | 3377 | na | na | 204 | 2016 | Millar Unpublished |
| 120 | Sierra Nevada | Virginia Cyn               | CA | 38.0602500 | -119.2816167 | 3414 | na | na | 168 | 2016 | Millar Unpublished |
| 121 | Sierra Nevada | Virginia Cyn               | CA | 38.0573667 | -119.2793500 | 3246 | na | na | 199 | 2016 | Millar Unpublished |
| 122 | Sierra Nevada | Deer Cr Cyn                | CA | 38.0240667 | -119.2162167 | 2609 | na | na | 344 | 2011 | Millar Unpublished |
| 123 | Sierra Nevada | Deer Cr Cyn                | CA | 38.0215167 | -119.2158333 | 2680 | na | na | 311 | 2011 | Millar Unpublished |
| 124 | Sierra Nevada | Deer Cr Cyn                | CA | 38.0177500 | -119.2160167 | 2789 | na | na | 356 | 2011 | Millar Unpublished |
| 125 | Sierra Nevada | Deer Cr Cyn                | CA | 38.0133500 | -119.2172000 | 2892 | na | na | 9   | 2011 | Millar Unpublished |
| 126 | Sierra Nevada | Deer Cr Cyn                | CA | 38.0159000 | -119.2104667 | 3045 | na | na | 328 | 2011 | Millar Unpublished |
| 127 | Sierra Nevada | Lundy Main Cyn             | CA | 38.0251333 | -119.2117667 | 2627 | na | na | 4   | 2015 | Millar Unpublished |
| 128 | Sierra Nevada | Deer Cr Cyn                | CA | 38.0168333 | -119.2175000 | 2808 | na | na | 35  | 2009 | Millar Unpublished |
| 129 | Sierra Nevada | Deer Cr Cyn                | CA | 38.0177333 | -119.2178833 | 2797 | na | na | 60  | 2009 | Millar Unpublished |
| 130 | Sierra Nevada | Deer Cr Cyn                | CA | 38.0233833 | -119.2159500 | 2579 | na | na | 309 | 2009 | Millar Unpublished |
| 131 | Sierra Nevada | Deer Cr Cyn                | CA | 38.0211667 | -119.2138833 | 2760 | na | na | 281 | 2009 | Millar Unpublished |
| 132 | Sierra Nevada | Deer Cr Cyn                | CA | 38.0196000 | -119.2122000 | 2883 | na | na | 272 | 2009 | Millar Unpublished |
| 133 | Sierra Nevada | Mt Excelsior               | CA | 38.0366667 | -119.3035333 | 3324 | na | na | 309 | 2012 | Millar Unpublished |
| 134 | Sierra Nevada | Lee Vining Pk              | CA | 37.9700667 | -119.1910333 | 3331 | na | na | 50  | 2012 | Millar Unpublished |
| 135 | Sierra Nevada | Lee Vining Pk              | CA | 37.9713167 | -119.1920333 | 3329 | na | na | 46  | 2012 | Millar Unpublished |
| 136 | Sierra Nevada | Rock Creek Cyn             | CA | 37.4166333 | -118.7677333 | 3383 | na | na | 174 | 2014 | Millar Unpublished |
| 137 | Sierra Nevada | Rock Creek Cyn             | CA | 37.4088000 | -118.7725667 | 3510 | na | na | 124 | 2014 | Millar Unpublished |
| 138 | Sierra Nevada | Rock Creek Cyn             | CA | 37.3993500 | -118.7717333 | 3582 | na | na | 30  | 2007 | Millar Unpublished |
| 139 | Sierra Nevada | Rock Creek Cyn             | CA | 37.3992500 | -118.7685833 | 3488 | na | na | 135 | 2007 | Millar Unpublished |
| 140 | Sierra Nevada | Rock Creek Cyn             | CA | 37.3966000 | -118.7634833 | 3297 | na | na | 64  | 2007 | Millar Unpublished |
| 141 | Sierra Nevada | Rock Creek Cyn             | CA | 37.3990500 | -118.7612167 | 3250 | na | na | 79  | 2007 | Millar Unpublished |
| 142 | Sierra Nevada | Hall Research Natural Area | CA | 37.9534667 | -119.2928833 | 3138 | na | na | 46  | 2016 | Millar Unpublished |
| 143 | Sierra Nevada | Hall Research Natural Area | CA | 37.9534833 | -119.2930000 | 3140 | na | na | 46  | 2016 | Millar Unpublished |
| 144 | Sierra Nevada | Hall Research Natural Area | CA | 37.9525333 | -119.2917833 | 3129 | na | na | 53  | 2016 | Millar Unpublished |
| 145 | Sierra Nevada | Hall Research Natural Area | CA | 37.9520167 | -119.2901167 | 3128 | na | na | 343 | 2016 | Millar Unpublished |
| 146 | Sierra Nevada | Hall Research Natural Area | CA | 37.9637333 | -119.2937833 | 3138 | na | na | 157 | 2016 | Millar Unpublished |
| 147 | Sierra Nevada | Mammoth Crest              | CA | 37.5576833 | -118.9822833 | 3310 | na | na | 352 | 2011 | Millar Unpublished |

|     |                      |                      |    |            |              |      |    |    |     |      |                    |
|-----|----------------------|----------------------|----|------------|--------------|------|----|----|-----|------|--------------------|
| 148 | Sierra Nevada        | Mammoth Crest        | CA | 37.5561833 | -118.9833167 | 3353 | na | na | 354 | 2012 | Millar Unpublished |
| 155 | Sweetwater Mountains | Mt Patterson         | CA | 38.4513833 | -119.3394167 | 2974 | na | na | 228 | 2015 | Millar Unpublished |
| 157 | Sweetwater Mountains | Mt Patterson         | CA | 38.4519333 | -119.3381667 | 3010 | na | na | 167 | 2015 | Millar Unpublished |
| 158 | Sweetwater Mountains | Mt Patterson         | CA | 38.4479667 | -119.3335333 | 3124 | na | na | 341 | 2015 | Millar Unpublished |
| 159 | Sweetwater Mountains | Mt Patterson         | CA | 38.4423833 | -119.3303000 | 3255 | na | na | 19  | 2015 | Millar Unpublished |
| 160 | Sweetwater Mountains | Mt Patterson         | CA | 38.4376333 | -119.3280500 | 3348 | na | na | 24  | 2015 | Millar Unpublished |
| 168 | Sierra Nevada        | Lundy Main Cyn       | CA | 38.0274000 | -119.2491000 | 2453 | na | na | 147 | 2014 | Millar Unpublished |
| 169 | Sierra Nevada        | Lundy Main Cyn       | CA | 38.0138000 | -119.2744667 | 2606 | na | na | 315 | 2015 | Millar Unpublished |
| 170 | Sierra Nevada        | Lundy Main Cyn       | CA | 38.0087500 | -119.2861667 | 2768 | na | na | 6   | 2015 | Millar Unpublished |
| 171 | Sierra Nevada        | Lundy Main Cyn       | CA | 38.0357000 | -119.2121500 | 2387 | na | na | 160 | 2015 | Millar Unpublished |
| 172 | Sierra Nevada        | Lundy Main Cyn       | CA | 38.0360000 | -119.2121833 | 2405 | na | na | 159 | 2015 | Millar Unpublished |
| 173 | Sierra Nevada        | Lundy Main Cyn       | CA | 38.0351667 | -119.2120167 | 2356 | na | na | 170 | 2015 | Millar Unpublished |
| 174 | Sierra Nevada        | Lundy Main Cyn       | CA | 38.0350167 | -119.2139000 | 2370 | na | na | 168 | 2015 | Millar Unpublished |
| 175 | Sierra Nevada        | Lundy Main Cyn       | CA | 38.0341667 | -119.2175667 | 2391 | na | na | 156 | 2015 | Millar Unpublished |
| 176 | Sierra Nevada        | Lundy Main Cyn       | CA | 38.0345000 | -119.2174167 | 2394 | na | na | 164 | 2015 | Millar Unpublished |
| 177 | Sierra Nevada        | Lundy Main Cyn       | CA | 38.0351500 | -119.2147500 | 2380 | na | na | 167 | 2015 | Millar Unpublished |
| 178 | Sierra Nevada        | Lundy Main Cyn       | CA | 38.0350333 | -119.2146833 | 2376 | na | na | 166 | 2015 | Millar Unpublished |
| 179 | Sierra Nevada        | Lundy Main Cyn       | CA | 38.0086333 | -119.2859500 | 2784 | na | na | 16  | 2016 | Millar Unpublished |
| 180 | Sierra Nevada        | Lundy Main Cyn       | CA | 38.0087333 | -119.2869167 | 2768 | na | na | 1   | 2016 | Millar Unpublished |
| 181 | Sierra Nevada        | Upper Lundy          | CA | 38.0057333 | -119.2878500 | 2979 | na | na | 343 | 2016 | Millar Unpublished |
| 182 | Sierra Nevada        | Upper Lundy          | CA | 38.0048333 | -119.2879833 | 3013 | na | na | 304 | 2016 | Millar Unpublished |
| 183 | Sierra Nevada        | Upper Lundy          | CA | 38.0033167 | -119.2881333 | 3080 | na | na | 337 | 2016 | Millar Unpublished |
| 184 | Sierra Nevada        | Upper Lundy          | CA | 38.0018667 | -119.2962500 | 3144 | na | na | 126 | 2016 | Millar Unpublished |
| 185 | Sierra Nevada        | Upper Lundy          | CA | 37.9998500 | -119.2979667 | 3134 | na | na | 152 | 2016 | Millar Unpublished |
| 186 | Sierra Nevada        | Upper Lundy          | CA | 38.0006667 | -119.3039667 | 3314 | na | na | 177 | 2016 | Millar Unpublished |
| 187 | Sierra Nevada        | Conway Summit region | CA | 38.0821167 | -119.2333167 | 2819 | na | na | 83  | 2016 | Millar Unpublished |
| 188 | Sierra Nevada        | Conway Summit region | CA | 38.0825667 | -119.2325000 | 2800 | na | na | 39  | 2016 | Millar Unpublished |
| 189 | Sierra Nevada        | Conway Summit region | CA | 38.0831000 | -119.2319833 | 2773 | na | na | 48  | 2016 | Millar Unpublished |
| 190 | Sierra Nevada        | Conway Summit region | CA | 38.0830167 | -119.2314000 | 2770 | na | na | 43  | 2016 | Millar Unpublished |
| 191 | Sierra Nevada        | Conway Summit region | CA | 38.0807000 | -119.2325167 | 2808 | na | na | 63  | 2016 | Millar Unpublished |
| 192 | Sierra Nevada        | Conway Summit region | CA | 38.0784500 | -119.2453167 | 3003 | na | na | 70  | 2016 | Millar Unpublished |
| 193 | Sierra Nevada        | Conway Summit region | CA | 38.0796667 | -119.2456000 | 3019 | na | na | 34  | 2016 | Millar Unpublished |
| 194 | Sierra Nevada        | Conway Summit region | CA | 38.0755500 | -119.2470333 | 3101 | na | na | 25  | 2016 | Millar Unpublished |
| 195 | Sierra Nevada        | Conway Summit region | CA | 38.0753000 | -119.2468333 | 3109 | na | na | 29  | 2016 | Millar Unpublished |
| 206 | Zunnamed Mountains   | Monitor Pass Range   | CA | 38.6806000 | -119.6116500 | 2689 | na | na | 146 | 2014 | Millar Unpublished |
| 208 | Zunnamed Mountains   | Monitor Pass Range   | CA | 38.6829460 | -119.5787280 | 2373 | na | na | 115 | 2014 | Millar Unpublished |
| 210 | Zunnamed Mountains   | Monitor Pass Range   | CA | 38.6657833 | -119.6261167 | 2539 | na | na | 246 | 2014 | Millar Unpublished |
| 211 | Sierra Nevada        | Carson Pass area     | CA | 38.6748500 | -119.9247333 | 2366 | na | na | 321 | 2007 | Millar Unpublished |
| 212 | Sierra Nevada        | Carson Pass area     | CA | 38.7776833 | -119.8897667 | 2067 | na | na | 181 | 2007 | Millar Unpublished |
| 218 | Shoshone Mountains   | Bald Mtn             | NV | 39.0044667 | -117.5555667 | 2760 | na | na | 96  | 2015 | Millar Unpublished |
| 219 | Shoshone Mountains   | Bald Mtn             | NV | 39.0044000 | -117.5555000 | 2765 | na | na | 135 | 2015 | Millar Unpublished |
| 220 | Shoshone Mountains   | Bald Mtn             | NV | 39.0065000 | -117.5590833 | 2849 | na | na | 136 | 2015 | Millar Unpublished |
| 221 | Shoshone Mountains   | Bald Mtn             | NV | 39.0066500 | -117.5596000 | 2858 | na | na | 175 | 2015 | Millar Unpublished |
| 222 | Shoshone Mountains   | Bald Mtn             | NV | 39.0070667 | -117.5594333 | 2868 | na | na | 63  | 2015 | Millar Unpublished |
| 223 | Shoshone Mountains   | Bald Mtn             | NV | 39.0078500 | -117.5604167 | 2861 | na | na | 13  | 2015 | Millar Unpublished |
| 224 | Toiyabe Range        | Ophir Canyon         | NV | 38.9459000 | -117.3524833 | 2652 | na | na | 188 | 2015 | Millar Unpublished |
| 225 | Toiyabe Range        | Ophir Canyon         | NV | 38.9459000 | -117.3524167 | 2655 | na | na | 188 | 2015 | Millar Unpublished |
| 226 | Toiyabe Range        | Ophir Canyon         | NV | 38.9460333 | -117.3533167 | 2637 | na | na | 198 | 2015 | Millar Unpublished |
| 228 | Sierra Nevada        | Parker Creek         | CA | 37.8613000 | -119.2185667 | 3403 | na | na | 207 | 2012 | Millar Unpublished |

|     |                      |                           |    |            |              |      |    |    |     |      |                    |
|-----|----------------------|---------------------------|----|------------|--------------|------|----|----|-----|------|--------------------|
| 229 | Sierra Nevada        | Parker Creek              | CA | 37.8620000 | -119.2190333 | 3422 | na | na | 210 | 2012 | Millar Unpublished |
| 230 | Sierra Nevada        | Parker Creek              | CA | 37.8628333 | -119.2200500 | 3438 | na | na | 202 | 2012 | Millar Unpublished |
| 233 | Sierra Nevada        | Sherwin Valentine Cyn     | CA | 37.5746667 | -118.9382333 | 2950 | na | na | 100 | 2008 | Millar Unpublished |
| 234 | Sierra Nevada        | Sherwin Valentine Cyn     | CA | 37.5741167 | -118.9386500 | 2966 | na | na | 63  | 2008 | Millar Unpublished |
| 235 | Sierra Nevada        | Sherwin Valentine Cyn     | CA | 37.5719000 | -118.9385333 | 2989 | na | na | 73  | 2008 | Millar Unpublished |
| 236 | Sierra Nevada        | Mono Dome                 | CA | 37.9582333 | -119.1774000 | 3138 | na | na | 343 | 2011 | Millar Unpublished |
| 237 | Sierra Nevada        | Mono Dome                 | CA | 37.9583500 | -119.1777833 | 3125 | na | na | 331 | 2011 | Millar Unpublished |
| 238 | Sierra Nevada        | Mono Dome                 | CA | 37.9579167 | -119.1773500 | 3155 | na | na | 343 | 2011 | Millar Unpublished |
| 239 | Sierra Nevada        | Mono Dome                 | CA | 37.9650667 | -119.1903333 | 3206 | na | na | 108 | 2013 | Millar Unpublished |
| 240 | Sierra Nevada        | Mono Dome                 | CA | 37.9656000 | -119.1901500 | 3206 | na | na | 126 | 2013 | Millar Unpublished |
| 241 | Sierra Nevada        | Mono Dome                 | CA | 37.9652333 | -119.1904833 | 3208 | na | na | 108 | 2013 | Millar Unpublished |
| 242 | White Mountains      | Bighorn Pk                | CA | 37.5591167 | -118.2081000 | 3470 | na | na | 295 | 2015 | Millar Unpublished |
| 243 | White Mountains      | Summit S of BH Pk         | CA | 37.5498000 | -118.2081333 | 3551 | na | na | 161 | 2015 | Millar Unpublished |
| 244 | White Mountains      | Summit S of BH Pk         | CA | 37.5504333 | -118.2073000 | 3556 | na | na | 140 | 2016 | Millar Unpublished |
| 245 | White Mountains      | Confluence of Cottonwoods | CA | 37.5667667 | -118.2078167 | 3371 | na | na | 20  | 2012 | Millar Unpublished |
| 246 | Sierra Nevada        | Lee Vining Cyn            | CA | 37.9297333 | -119.1821833 | 2327 | na | na | 59  | 2015 | Millar Unpublished |
| 247 | Sierra Nevada        | Lee Vining Cyn            | CA | 37.9397833 | -119.2115500 | 2618 | na | na | 0   | 2011 | Millar Unpublished |
| 248 | Sierra Nevada        | Lee Vining Cyn            | CA | 37.9417000 | -119.2106500 | 2493 | na | na | 352 | 2011 | Millar Unpublished |
| 253 | Sierra Nevada        | Tioga Pk                  | CA | 37.9491833 | -119.2277000 | 2849 | na | na | 55  | 2008 | Millar Unpublished |
| 254 | Sierra Nevada        | Tioga Pk                  | CA | 37.9473667 | -119.2293000 | 2923 | na | na | 14  | 2008 | Millar Unpublished |
| 255 | Sierra Nevada        | Tioga Pk                  | CA | 37.9465833 | -119.2305333 | 2964 | na | na | 38  | 2008 | Millar Unpublished |
| 256 | Sierra Nevada        | Tioga Pk                  | CA | 37.9468833 | -119.2314000 | 2979 | na | na | 71  | 2008 | Millar Unpublished |
| 257 | Sierra Nevada        | Warren Fork Cyn           | CA | 37.9514333 | -119.2315167 | 2947 | na | na | 18  | 2015 | Millar Unpublished |
| 258 | Sierra Nevada        | Warren Fork Cyn           | CA | 37.9541667 | -119.2305333 | 2791 | na | na | 36  | 2015 | Millar Unpublished |
| 259 | Sierra Nevada        | Warren Fork Cyn           | CA | 37.9548500 | -119.2298500 | 2772 | na | na | 64  | 2014 | Millar Unpublished |
| 260 | Sierra Nevada        | Warren Fork Cyn           | CA | 37.9704667 | -119.2450333 | 3018 | na | na | 132 | 2015 | Millar Unpublished |
| 261 | Sierra Nevada        | Warren Fork Cyn           | CA | 37.9547500 | -119.2265333 | 2797 | na | na | 200 | 2015 | Millar Unpublished |
| 262 | Sierra Nevada        | Warren Fork Cyn           | CA | 37.9716500 | -119.2392500 | 3055 | na | na | 249 | 2015 | Millar Unpublished |
| 263 | Sierra Nevada        | Warren Fork Cyn           | CA | 37.9716500 | -119.2379500 | 3099 | na | na | 248 | 2015 | Millar Unpublished |
| 264 | Sierra Nevada        | Warren Fork Cyn           | CA | 37.9748000 | -119.2317333 | 3158 | na | na | 222 | 2015 | Millar Unpublished |
| 265 | Sierra Nevada        | Warren Fork Cyn           | CA | 37.9696000 | -119.2313500 | 3093 | na | na | 210 | 2015 | Millar Unpublished |
| 266 | Sierra Nevada        | Warren Fork Cyn           | CA | 37.9590167 | -119.2238833 | 2962 | na | na | 226 | 2011 | Millar Unpublished |
| 275 | Wassuk Mountains     | Big Indian Mtn            | NV | 38.4884667 | -118.7912500 | 3002 | na | na | 8   | 2014 | Millar Unpublished |
| 276 | Wassuk Mountains     | Big Indian Mtn            | NV | 38.4887167 | -118.7966500 | 3048 | na | na | 76  | 2014 | Millar Unpublished |
| 277 | Sierra Nevada        | Duck/Deer Pass            | CA | 37.5643667 | -118.9810833 | 3414 | na | na | 7   | 2012 | Millar Unpublished |
| 278 | Sierra Nevada        | Glacier Cyn/Dana Glacier  | CA | 37.9169000 | -119.2345333 | 3247 | na | na | 220 | 2014 | Millar Unpublished |
| 279 | Sierra Nevada        | Glacier Cyn/Dana Glacier  | CA | 37.9117333 | -119.2256667 | 3341 | na | na | 263 | 2014 | Millar Unpublished |
| 280 | Sierra Nevada        | Carson Pass               | CA | 38.6810167 | -119.9840167 | 2808 | na | na | 14  | 2008 | Millar Unpublished |
| 281 | Sierra Nevada        | Carson Pass               | CA | 38.6808333 | -119.9842500 | 2810 | na | na | 349 | 2008 | Millar Unpublished |
| 282 | Sierra Nevada        | Carson Pass               | CA | 38.6808000 | -119.9840500 | 2822 | na | na | 22  | 2008 | Millar Unpublished |
| 283 | Sweetwater Mountains | Devils Gate               | CA | 38.3478667 | -119.3742167 | 2310 | na | na | 352 | 2008 | Millar Unpublished |
| 284 | White Mountains      | Schulman Grove            | CA | 37.3886167 | -118.1821167 | 3097 | na | na | 238 | 2014 | Millar Unpublished |
| 285 | White Mountains      | Schulman Grove            | CA | 37.3887000 | -118.1818167 | 3105 | na | na | 231 | 2014 | Millar Unpublished |
| 286 | White Mountains      | Enfiled Arch Site         | CA | 37.4853833 | -118.1880833 | 3192 | na | na | 28  | 2008 | Millar Unpublished |
| 287 | White Mountains      | Above Enfield Arch Site   | CA | 37.4855833 | -118.1824667 | 3192 | na | na | 308 | 2015 | Millar Unpublished |
| 288 | White Mountains      | Above Enfield Arch Site   | CA | 37.4849167 | -118.1820667 | 3219 | na | na | 322 | 2015 | Millar Unpublished |
| 289 | Sierra Nevada        | Lamarck Basin             | CA | 37.2153333 | -118.6423333 | 3275 | na | na | 325 | 2008 | Millar Unpublished |
| 290 | Sierra Nevada        | Lamarck Basin             | CA | 37.2116667 | -118.6458000 | 3344 | na | na | 11  | 2008 | Millar Unpublished |
| 291 | Sierra Nevada        | Lamarck Basin             | CA | 37.2162833 | -118.6440167 | 3258 | na | na | 47  | 2008 | Millar Unpublished |

|     |                 |                           |    |            |              |      |    |    |     |      |                    |
|-----|-----------------|---------------------------|----|------------|--------------|------|----|----|-----|------|--------------------|
| 292 | Sierra Nevada   | Lamarck Basin             | CA | 37.2194667 | -118.6432167 | 3283 | na | na | 181 | 2008 | Millar Unpublished |
| 293 | Sierra Nevada   | North Lk                  | CA | 37.2282667 | -118.6237833 | 2839 | na | na | 164 | 2012 | Millar Unpublished |
| 294 | Sierra Nevada   | N Palisades Basin         | CA | 37.1241667 | -118.4847833 | 3065 | na | na | 323 | 2008 | Millar Unpublished |
| 295 | Sierra Nevada   | N Palisades Basin         | CA | 37.1222000 | -118.4855000 | 3076 | na | na | 336 | 2008 | Millar Unpublished |
| 296 | Sierra Nevada   | N Palisades Basin         | CA | 37.1325667 | -118.4911833 | 3222 | na | na | 169 | 2008 | Millar Unpublished |
| 297 | Sierra Nevada   | N Palisades Basin         | CA | 37.1357167 | -118.4999500 | 3371 | na | na | 205 | 2008 | Millar Unpublished |
| 298 | Sierra Nevada   | N Palisades Basin         | CA | 37.1372000 | -118.5060500 | 3389 | na | na | 195 | 2008 | Millar Unpublished |
| 299 | Sierra Nevada   | N Palisades Basin         | CA | 37.1388167 | -118.5138500 | 3414 | na | na | 178 | 2008 | Millar Unpublished |
| 300 | Sierra Nevada   | N Palisades Basin         | CA | 37.1230500 | -118.5033833 | 3285 | na | na | 40  | 2008 | Millar Unpublished |
| 301 | Sierra Nevada   | N Palisades Basin         | CA | 37.1194167 | -118.5044667 | 3359 | na | na | 302 | 2008 | Millar Unpublished |
| 302 | Sierra Nevada   | N Palisades Basin         | CA | 37.1193500 | -118.5031167 | 3437 | na | na | 334 | 2008 | Millar Unpublished |
| 303 | Sierra Nevada   | N Palisades Basin         | CA | 37.1154000 | -118.5034667 | 3537 | na | na | 25  | 2008 | Millar Unpublished |
| 304 | Sierra Nevada   | Palisades Confluence      | CA | 37.1229833 | -118.4365000 | 2398 | na | na | 338 | 2008 | Millar Unpublished |
| 305 | Sierra Nevada   | E Fk Rock Cr              | CA | 37.4128833 | -118.7076000 | 3527 | na | na | 301 | 2011 | Millar Unpublished |
| 306 | Sierra Nevada   | E Fk Rock Cr              | CA | 37.4201500 | -118.7596167 | 3515 | na | na | 135 | 2011 | Millar Unpublished |
| 308 | White Mountains | Barcroft area             | CA | 37.5842667 | -118.2386167 | 3828 | na | na | 128 | 2012 | Millar Unpublished |
| 309 | White Mountains | Barcroft area             | CA | 37.5856000 | -118.2392000 | 3847 | na | na | 135 | 2012 | Millar Unpublished |
| 310 | White Mountains | Barcroft area             | CA | 37.5880167 | -118.2407667 | 3887 | na | na | 124 | 2012 | Millar Unpublished |
| 311 | White Mountains | Alpine Village site 12640 | CA | 37.5966000 | -118.2449667 | 3847 | na | na | 143 | 2008 | Millar Unpublished |
| 312 | Sierra Nevada   | Parker Pass, YNP          | CA | 37.8349333 | -119.2058000 | 3402 | na | na | 46  | 2012 | Millar Unpublished |
| 313 | Toquima Range   | Pine Creek                | NV | 38.7678500 | -116.9115667 | 3011 | na | na | 324 | 2008 | Millar Unpublished |
| 314 | Toquima Range   | Pine Creek                | NV | 38.7592500 | -116.9210833 | 3240 | na | na | 347 | 2008 | Millar Unpublished |
| 315 | Toquima Range   | Pine Creek                | NV | 38.7592000 | -116.9277833 | 3350 | na | na | 95  | 2008 | Millar Unpublished |
| 316 | Toquima Range   | Pine Creek                | NV | 38.7612500 | -116.9173167 | 3200 | na | na | 341 | 2008 | Millar Unpublished |
| 317 | Toquima Range   | Mt Jefferson              | NV | 38.7664333 | -116.9350167 | 3492 | na | na | 156 | 2015 | Millar Unpublished |
| 318 | Toquima Range   | Mt Jefferson              | NV | 38.7848667 | -116.9388833 | 3418 | na | na | 267 | 2015 | Millar Unpublished |
| 319 | Toquima Range   | S Fk Pine Cr              | NV | 38.7698000 | -116.9291833 | 3253 | na | na | 29  | 2016 | Millar Unpublished |
| 320 | Sierra Nevada   | Rush Cr Drainage          | CA | 37.7502833 | -119.1335167 | 2776 | na | na | 328 | 2015 | Millar Unpublished |
| 321 | Sierra Nevada   | Rush Cr Drainage          | CA | 37.7488167 | -119.1327833 | 2823 | na | na | 284 | 2015 | Millar Unpublished |
| 322 | Sierra Nevada   | Rush Cr Drainage          | CA | 37.7466000 | -119.1319167 | 2880 | na | na | 252 | 2015 | Millar Unpublished |
| 323 | Sierra Nevada   | Rush Cr Drainage          | CA | 37.7399500 | -119.1428333 | 3022 | na | na | 10  | 2015 | Millar Unpublished |
| 324 | Sierra Nevada   | Rush Cr Drainage          | CA | 37.7386667 | -119.1465667 | 2989 | na | na | 250 | 2015 | Millar Unpublished |
| 325 | Sierra Nevada   | Rush Cr Drainage          | CA | 37.7567667 | -119.1310167 | 2626 | na | na | 318 | 2015 | Millar Unpublished |
| 326 | Sierra Nevada   | Rush Cr Drainage          | CA | 37.7582333 | -119.1310833 | 2581 | na | na | 299 | 2015 | Millar Unpublished |
| 327 | Sierra Nevada   | Rush Cr Drainage          | CA | 37.7783333 | -119.1297000 | 2217 | na | na | 78  | 2015 | Millar Unpublished |
| 330 | Sierra Nevada   | Gable Cr Trail            | CA | 37.3524500 | -118.6846333 | 2591 | na | na | 28  | 2015 | Millar Unpublished |
| 335 | Sierra Nevada   | Virginia Lakes            | CA | 38.0524000 | -119.2716000 | 3035 | na | na | 158 | 2016 | Millar Unpublished |
| 336 | Sierra Nevada   | Virginia Lakes            | CA | 38.0433667 | -119.2940833 | 3337 | na | na | 115 | 2016 | Millar Unpublished |
| 337 | Sierra Nevada   | Virginia Lakes            | CA | 38.0419500 | -119.2976667 | 3366 | na | na | 249 | 2016 | Millar Unpublished |
| 338 | Sierra Nevada   | Green Cr                  | CA | 38.0400000 | -119.3068000 | 3313 | na | na | 19  | 2016 | Millar Unpublished |
| 339 | Sierra Nevada   | Green Cr                  | CA | 38.0399500 | -119.3087667 | 3374 | na | na | 4   | 2016 | Millar Unpublished |
| 340 | Sierra Nevada   | Dana Plateau              | CA | 37.9293833 | -119.2390000 | 3263 | na | na | 283 | 2016 | Millar Unpublished |
| 341 | Sierra Nevada   | Rock Cr                   | CA | 37.4186667 | -118.7560167 | 3185 | na | na | 119 | 2010 | Millar Unpublished |
| 342 | Sierra Nevada   | Deer Lks                  | CA | 37.5634000 | -118.9857833 | 3264 | na | na | 213 | 2012 | Millar Unpublished |
| 343 | Sierra Nevada   | Deer Lks                  | CA | 37.5556333 | -118.9808667 | 3374 | na | na | 332 | 2011 | Millar Unpublished |
| 344 | Sierra Nevada   | Deer Pass                 | CA | 37.5592500 | -118.9744833 | 3429 | na | na | 133 | 2011 | Millar Unpublished |
| 345 | Sierra Nevada   | Helen Lk                  | CA | 37.7786000 | -119.2263667 | 3342 | na | na | 172 | 2014 | Millar Unpublished |
| 349 | Bodie Mountains | Bodie St Pk               | CA | 38.1970833 | -119.0098833 | 2613 | na | na | 45  | 2008 | Millar Unpublished |
| 351 | Sierra Nevada   | Sherwin Valentine Cyn     | CA | 37.5719000 | -118.9399167 | 3029 | na | na | 97  | 2008 | Millar Unpublished |

|     |                 |                            |    |            |              |      |    |    |     |      |                    |
|-----|-----------------|----------------------------|----|------------|--------------|------|----|----|-----|------|--------------------|
| 352 | Sierra Nevada   | Sherwin Valentine Cyn      | CA | 37.5748333 | -118.9386667 | 2984 | na | na | 117 | 2008 | Millar Unpublished |
| 353 | Sierra Nevada   | Gibbs Cyn                  | CA | 37.8992833 | -119.1945000 | 3119 | na | na | 123 | 2014 | Millar Unpublished |
| 354 | Sierra Nevada   | Lake Cyn                   | CA | 38.0117500 | -119.2451667 | 2773 | na | na | 76  | 2016 | Millar Unpublished |
| 355 | Sierra Nevada   | Lake Cyn                   | CA | 38.0130667 | -119.2452333 | 2765 | na | na | 105 | 2016 | Millar Unpublished |
| 356 | White Mountains | Bighorn Pk                 | CA | 37.5576000 | -118.2065833 | 3417 | na | na | 148 | 2015 | Millar Unpublished |
| 357 | Sierra Nevada   | Upper Lundy                | CA | 37.9997667 | -119.2903667 | 3132 | na | na | 257 | 2014 | Millar Unpublished |
| 358 | Sierra Nevada   | Lee Vining Cyn             | CA | 37.9397167 | -119.2103000 | 2620 | na | na | 349 | 2013 | Millar Unpublished |
| 361 | Sierra Nevada   | Waterfall below Conness Lk | CA | 37.9807500 | -119.3006167 | 3170 | na | na | 125 | 2015 | Millar Unpublished |
| 362 | Sierra Nevada   | Recess Moraine             | CA | 37.9861833 | -119.3060000 | 3160 | na | na | 303 | 2015 | Millar Unpublished |
| 366 | White Mountains | Cottonwood Drainage        | CA | 37.5645833 | -118.2071667 | 3366 | na | na | 270 | 2015 | Millar Unpublished |
| 367 | White Mountains | Cottonwood Drainage        | CA | 37.5587667 | -118.2097167 | 3444 | na | na | 25  | 2015 | Millar Unpublished |
| 368 | White Mountains | Cottonwood Drainage        | CA | 37.5686333 | -118.2075667 | 3377 | na | na | 310 | 2015 | Millar Unpublished |
| 369 | White Mountains | Cottonwood Drainage        | CA | 37.5539667 | -118.2105833 | 3473 | na | na | 95  | 2015 | Millar Unpublished |
| 370 | Sierra Nevada   | N Palisades Basin          | CA | 37.1342000 | -118.5244833 | 3589 | na | na | 160 | 2008 | Millar Unpublished |
| 371 | Sierra Nevada   | N Palisades Basin          | CA | 37.1124833 | -118.5102000 | 3620 | na | na | 309 | 2008 | Millar Unpublished |
| 372 | Sierra Nevada   | N Palisades Basin          | CA | 37.1194667 | -118.5040333 | 3395 | na | na | 313 | 2008 | Millar Unpublished |
| 373 | Sierra Nevada   | Deer Lks                   | CA | 37.5556833 | -118.9832000 | 3374 | na | na | 9   | 2011 | Millar Unpublished |
| 374 | Sierra Nevada   | Duck Pass                  | CA | 37.5588667 | -118.9633167 | 3293 | na | na | 345 | 2013 | Millar Unpublished |
| 375 | Sierra Nevada   | Virginia Cyn               | CA | 38.0522833 | -119.2687333 | 3025 | na | na | 203 | 2016 | Millar Unpublished |
| 376 | Sierra Nevada   | Virginia Cyn               | CA | 38.0520833 | -119.2699500 | 3019 | na | na | 190 | 2016 | Millar Unpublished |
| 377 | Sierra Nevada   | Dunderberg                 | CA | 38.0656167 | -119.2448000 | 3070 | na | na | 165 | 2016 | Millar Unpublished |
| 378 | Sierra Nevada   | Dunderberg                 | CA | 38.0657667 | -119.2450167 | 3079 | na | na | 165 | 2016 | Millar Unpublished |
| 379 | Sierra Nevada   | Lundy Main Cyn             | CA | 38.0360833 | -119.2079667 | 2367 | na | na | 176 | 2016 | Millar Unpublished |
| 380 | Sierra Nevada   | Lundy Main Cyn             | CA | 38.0365833 | -119.2093167 | 2392 | na | na | 177 | 2016 | Millar Unpublished |
| 381 | Sierra Nevada   | Lundy Main Cyn             | CA | 38.0359167 | -119.2118167 | 2390 | na | na | 162 | 2016 | Millar Unpublished |
| 382 | Sierra Nevada   | Lundy Main Cyn             | CA | 38.0359667 | -119.2113667 | 2382 | na | na | 173 | 2016 | Millar Unpublished |
| 383 | Sierra Nevada   | Lundy Main Cyn             | CA | 38.0358333 | -119.2114333 | 2381 | na | na | 171 | 2016 | Millar Unpublished |
| 384 | Sierra Nevada   | Lundy Main Cyn             | CA | 38.0361833 | -119.2113000 | 2391 | na | na | 168 | 2016 | Millar Unpublished |
| 385 | Sierra Nevada   | Lundy Main Cyn             | CA | 38.0360667 | -119.2114500 | 2384 | na | na | 170 | 2016 | Millar Unpublished |
| 386 | Sierra Nevada   | Lundy Main Cyn             | CA | 38.0349000 | -119.2139167 | 2366 | na | na | 158 | 2016 | Millar Unpublished |
| 387 | Sierra Nevada   | Lundy Main Cyn             | CA | 38.0352000 | -119.2139167 | 2376 | na | na | 168 | 2016 | Millar Unpublished |
| 388 | Sierra Nevada   | Lundy Main Cyn             | CA | 38.0350000 | -119.2139000 | 2375 | na | na | 163 | 2016 | Millar Unpublished |
| 389 | Sierra Nevada   | Lundy Main Cyn             | CA | 38.0349500 | -119.2142167 | 2375 | na | na | 156 | 2016 | Millar Unpublished |
| 390 | Sierra Nevada   | Virginia Lks               | CA | 38.0511000 | -119.2666333 | 3038 | na | na | 196 | 2016 | Millar Unpublished |
| 391 | Sierra Nevada   | Virginia Lks               | CA | 38.0512833 | -119.2667500 | 3037 | na | na | 197 | 2016 | Millar Unpublished |
| 392 | Sierra Nevada   | Virginia Lks               | CA | 38.0522000 | -119.2729500 | 3066 | na | na | 144 | 2016 | Millar Unpublished |
| 393 | Sierra Nevada   | Virginia Lks               | CA | 38.0537667 | -119.2731833 | 3113 | na | na | 173 | 2016 | Millar Unpublished |
| 394 | Sierra Nevada   | Virginia Lks               | CA | 38.0551833 | -119.2737500 | 3188 | na | na | 190 | 2016 | Millar Unpublished |
| 395 | Sierra Nevada   | Virginia Lks               | CA | 38.0557167 | -119.2747333 | 3212 | na | na | 176 | 2016 | Millar Unpublished |
| 396 | Sierra Nevada   | Virginia Lks               | CA | 38.0560000 | -119.2761000 | 3208 | na | na | 189 | 2016 | Millar Unpublished |
| 398 | Sierra Nevada   | Conway Summit region       | CA | 38.0818667 | -119.2320333 | 2802 | na | na | 73  | 2016 | Millar Unpublished |
| 399 | Sierra Nevada   | Green Lk Trail             | CA | 38.1010167 | -119.2945500 | 2602 | na | na | 130 | 2014 | Millar Unpublished |
| 400 | Sierra Nevada   | Green Lk Trail             | CA | 38.0925000 | -119.3145667 | 2920 | na | na | 155 | 2014 | Millar Unpublished |
| 403 | Mono Craters    | Pumice Mine                | CA | 37.8421833 | -119.0084000 | 2533 | na | na | 233 | 2016 | Millar Unpublished |
| 405 | Sierra Nevada   | Lower Lee Vining Cyn       | CA | 37.9408500 | -119.1841667 | 2307 | na | na | 206 | 2016 | Millar Unpublished |
| 406 | Sierra Nevada   | Lower Lee Vining Cyn       | CA | 37.9408833 | -119.1834000 | 2337 | na | na | 208 | 2016 | Millar Unpublished |
| 407 | Sierra Nevada   | Copper Mountain            | CA | 38.0467167 | -119.1967500 | 2862 | na | na | 345 | 2011 | Millar Unpublished |
| 408 | Sierra Nevada   | Lake Cyn Rd                | CA | 38.0283500 | -119.2252667 | 2405 | na | na | 338 | 2016 | Millar Unpublished |
| 409 | Sierra Nevada   | Lake Cyn Rd                | CA | 38.0125667 | -119.2451167 | 2760 | na | na | 85  | 2016 | Millar Unpublished |

|     |               |                       |    |            |              |      |    |    |     |      |                    |
|-----|---------------|-----------------------|----|------------|--------------|------|----|----|-----|------|--------------------|
| 410 | Sierra Nevada | Lake Cyn Rd           | CA | 38.0046000 | -119.2478167 | 2897 | na | na | 107 | 2016 | Millar Unpublished |
| 411 | Sierra Nevada | Lake Cyn              | CA | 37.9937000 | -119.2530833 | 2951 | na | na | 131 | 2016 | Millar Unpublished |
| 412 | Sierra Nevada | Lake Cyn              | CA | 37.9898500 | -119.2527667 | 2987 | na | na | 37  | 2016 | Millar Unpublished |
| 413 | Sierra Nevada | Lake Cyn              | CA | 38.0189167 | -119.2418167 | 2666 | na | na | 347 | 2016 | Millar Unpublished |
| 414 | Sierra Nevada | Lake Cyn              | CA | 38.0072333 | -119.2454167 | 2858 | na | na | 81  | 2016 | Millar Unpublished |
| 415 | Sierra Nevada | Lake Cyn              | CA | 38.0017333 | -119.2484667 | 2905 | na | na | 97  | 2016 | Millar Unpublished |
| 416 | Sierra Nevada | Lake Cyn              | CA | 37.9969833 | -119.2515333 | 2954 | na | na | 117 | 2016 | Millar Unpublished |
| 417 | Sierra Nevada | Lake Cyn              | CA | 37.9960667 | -119.2520667 | 2969 | na | na | 123 | 2016 | Millar Unpublished |
| 418 | Sierra Nevada | Lake Cyn              | CA | 37.9942833 | -119.2490500 | 3012 | na | na | 290 | 2016 | Millar Unpublished |
| 419 | Sierra Nevada | Conway Highland       | CA | 38.0828833 | -119.2328833 | 2800 | na | na | 32  | 2016 | Millar Unpublished |
| 420 | Sierra Nevada | Virginia Lks Cyn      | CA | 38.0563833 | -119.2765333 | 3219 | na | na | 171 | 2016 | Millar Unpublished |
| 421 | Sierra Nevada | Virginia Lks Cyn      | CA | 38.0570500 | -119.2783833 | 3228 | na | na | 196 | 2016 | Millar Unpublished |
| 422 | Sierra Nevada | Virginia Lks Cyn      | CA | 38.0568167 | -119.2777833 | 3220 | na | na | 192 | 2016 | Millar Unpublished |
| 423 | Sierra Nevada | Virginia Lks Cyn      | CA | 38.0573333 | -119.2793667 | 3230 | na | na | 199 | 2016 | Millar Unpublished |
| 424 | Sierra Nevada | Gardisky Lk Trail     | CA | 37.9537000 | -119.2596333 | 3110 | na | na | 225 | 2016 | Millar Unpublished |
| 425 | Sierra Nevada | Gardisky Lk           | CA | 37.9609333 | -119.2596500 | 3368 | na | na | 140 | 2016 | Millar Unpublished |
| 426 | Sierra Nevada | Tioga Crest           | CA | 37.9650333 | -119.2535500 | 3402 | na | na | 350 | 2016 | Millar Unpublished |
| 427 | Sierra Nevada | Tioga Crest           | CA | 37.9648500 | -119.2508500 | 3419 | na | na | 60  | 2016 | Millar Unpublished |
| 428 | Sierra Nevada | Glacier Cyn           | CA | 37.9080333 | -119.2304333 | 3328 | na | na | 311 | 2016 | Millar Unpublished |
| 429 | Sierra Nevada | Dana Plateau          | CA | 37.9223000 | -119.2326833 | 3456 | na | na | 230 | 2016 | Millar Unpublished |
| 430 | Sierra Nevada | Dana Plateau          | CA | 37.9197833 | -119.2350167 | 3318 | na | na | 240 | 2016 | Millar Unpublished |
| 431 | Sierra Nevada | Convict Cr Cyn        | CA | 37.5839667 | -118.8746000 | 2466 | na | na | 128 | 2014 | Millar Unpublished |
| 432 | Sierra Nevada | Convict Cr Cyn        | CA | 37.5727000 | -118.8742000 | 2556 | na | na | 92  | 2014 | Millar Unpublished |
| 433 | Sierra Nevada | Convict Cr Cyn        | CA | 37.5689833 | -118.8732833 | 2569 | na | na | 102 | 2014 | Millar Unpublished |
| 434 | Sierra Nevada | Virginia Lks Cyn      | CA | 38.0533167 | -119.2773833 | 3176 | na | na | 134 | 2016 | Millar Unpublished |
| 435 | Sierra Nevada | Lundy Main Cyn        | CA | 38.0270833 | -119.2499333 | 2448 | na | na | 140 | 2016 | Millar Unpublished |
| 436 | Sierra Nevada | Lundy Main Cyn        | CA | 38.0343500 | -119.2142833 | 2464 | na | na | 132 | 2016 | Millar Unpublished |
| 437 | Sierra Nevada | Lundy Main Cyn        | CA | 38.0374167 | -119.2188333 | 2470 | na | na | 94  | 2016 | Millar Unpublished |
| 438 | Sierra Nevada | Warren Fork Cyn       | CA | 37.9763333 | -119.2454833 | 3060 | na | na | 153 | 2016 | Millar Unpublished |
| 439 | Sierra Nevada | Warren Fork Cyn       | CA | 37.9775167 | -119.2451000 | 3086 | na | na | 135 | 2016 | Millar Unpublished |
| 440 | Sierra Nevada | Warren Fork Cyn       | CA | 37.9796833 | -119.2429667 | 3107 | na | na | 202 | 2016 | Millar Unpublished |
| 441 | Sierra Nevada | Warren Fork Cyn       | CA | 37.9809167 | -119.2403000 | 3138 | na | na | 199 | 2016 | Millar Unpublished |
| 442 | Sierra Nevada | Warren Fork Cyn       | CA | 37.9817167 | -119.2414667 | 3151 | na | na | 215 | 2016 | Millar Unpublished |
| 443 | Sierra Nevada | Warren Fork Cyn       | CA | 37.9703000 | -119.2451667 | 3000 | na | na | 132 | 2016 | Millar Unpublished |
| 444 | Sierra Nevada | Warren Fork Cyn       | CA | 37.9817833 | -119.2371667 | 3208 | na | na | 196 | 2016 | Millar Unpublished |
| 445 | Sierra Nevada | Jordan Basin          | CA | 38.0501667 | -119.2264833 | 2993 | na | na | 20  | 2016 | Millar Unpublished |
| 446 | Sierra Nevada | Jordan Basin          | CA | 38.0504833 | -119.2274667 | 3006 | na | na | 42  | 2016 | Millar Unpublished |
| 449 | Sierra Nevada | Saddlebag Lk, NE side | CA | 37.9835667 | -119.2816667 | 3125 | na | na | 197 | 2016 | Millar Unpublished |
| 450 | Sierra Nevada | Saddlebag Lk, NE side | CA | 37.9834833 | -119.2812500 | 3125 | na | na | 202 | 2016 | Millar Unpublished |
| 451 | Sierra Nevada | Saddlebag Lk, NE side | CA | 37.9831500 | -119.2807000 | 3126 | na | na | 193 | 2016 | Millar Unpublished |
| 452 | Sierra Nevada | Saddlebag Lk, NE side | CA | 37.9836833 | -119.2810000 | 3142 | na | na | 197 | 2016 | Millar Unpublished |
| 453 | Sierra Nevada | Saddlebag Lk, NE side | CA | 37.9838667 | -119.2814333 | 3152 | na | na | 200 | 2016 | Millar Unpublished |
| 454 | Sierra Nevada | Saddlebag Lk, NE side | CA | 37.9877420 | -119.2840300 | 3165 | na | na | 182 | 2016 | Millar Unpublished |
| 455 | Sierra Nevada | Saddlebag Lk, NE side | CA | 37.9839500 | -119.2821500 | 3135 | na | na | 203 | 2016 | Millar Unpublished |
| 457 | Sierra Nevada | Robinson Cyn          | CA | 38.1522833 | -119.4045333 | 2377 | na | na | 183 | 2009 | Millar Unpublished |
| 458 | Sierra Nevada | Robinson Cyn          | CA | 38.1520667 | -119.4041000 | 2358 | na | na | 183 | 2009 | Millar Unpublished |
| 459 | Sierra Nevada | Robinson Cyn          | CA | 38.1518167 | -119.4070667 | 2384 | na | na | 160 | 2009 | Millar Unpublished |
| 460 | Sierra Nevada | Rock Cr               | CA | 37.4125333 | -118.7781000 | 3574 | na | na | 77  | 2009 | Millar Unpublished |
| 461 | Sierra Nevada | Rock Cr               | CA | 37.4130833 | -118.7735333 | 3403 | na | na | 60  | 2009 | Millar Unpublished |



|     |                 |                       |    |            |              |      |    |    |     |      |                    |
|-----|-----------------|-----------------------|----|------------|--------------|------|----|----|-----|------|--------------------|
| 462 | Sierra Nevada   | Upper Lee Vining Cyn  | CA | 37.9575667 | -119.3013500 | 3149 | na | na | 169 | 2016 | Millar Unpublished |
| 463 | Sierra Nevada   | Upper Lee Vining Cyn  | CA | 37.9579833 | -119.3048167 | 3225 | na | na | 136 | 2016 | Millar Unpublished |
| 464 | Sierra Nevada   | 20 Lakes Basin        | CA | 37.9907833 | -119.2870833 | 3154 | na | na | 232 | 2016 | Millar Unpublished |
| 465 | Sierra Nevada   | Upper Lee Vining Cyn  | CA | 37.9387833 | -119.2623667 | 3006 | na | na | 180 | 2016 | Millar Unpublished |
| 466 | Sierra Nevada   | Granite Lks           | CA | 37.9303333 | -119.2644167 | 3233 | na | na | 5   | 2016 | Millar Unpublished |
| 467 | White Mountains | Mt Barcroft           | CA | 37.5822667 | -118.2478667 | 3968 | na | na | 60  | 2015 | Millar Unpublished |
| 468 | White Mountains | Mt Barcroft           | CA | 37.5823667 | -118.2485833 | 3965 | na | na | 349 | 2015 | Millar Unpublished |
| 469 | White Mountains | Mt Barcroft           | CA | 37.5804167 | -118.2473833 | 3923 | na | na | 149 | 2015 | Millar Unpublished |
| 470 | White Mountains | Cottonwood Drainage   | CA | 37.5500167 | -118.2147167 | 3563 | na | na | 122 | 2015 | Millar Unpublished |
| 471 | White Mountains | Cottonwood Drainage   | CA | 37.3832000 | -118.2165500 | 3578 | na | na | 289 | 2015 | Millar Unpublished |
| 472 | White Mountains | Bighorn Pk area       | CA | 37.5543167 | -118.2063333 | 3517 | na | na | 5   | 2015 | Millar Unpublished |
| 473 | White Mountains | Bighorn Pk area       | CA | 37.5574333 | -118.2072667 | 3480 | na | na | 110 | 2015 | Millar Unpublished |
| 474 | White Mountains | Middle Ridge Cotton S | CA | 37.5638833 | -118.2121000 | 3522 | na | na | 264 | 2015 | Millar Unpublished |
| 475 | White Mountains | Crooked Creek         | CA | 37.5068500 | -118.1592667 | 3045 | na | na | 185 | 2015 | Millar Unpublished |
| 476 | White Mountains | Enfield Butte         | CA | 37.4853333 | -118.1881167 | 3192 | na | na | 28  | 2016 | Millar Unpublished |
| 477 | Sierra Nevada   | Duck Pass             | CA | 37.5657000 | -118.9625667 | 3207 | na | na | 9   | 2012 | Millar Unpublished |
| 478 | Sierra Nevada   | Duck Pass             | CA | 37.5646000 | -118.9624000 | 3261 | na | na | 258 | 2012 | Millar Unpublished |
| 479 | Sierra Nevada   | Granite Lks           | CA | 37.9345833 | -119.2755500 | 3421 | na | na | 102 | 2012 | Millar Unpublished |
| 480 | Sierra Nevada   | Mt Dunderberg         | CA | 38.0763167 | -119.2634000 | 3199 | na | na | 59  | 2016 | Millar Unpublished |
| 481 | Sierra Nevada   | Mt Dunderberg         | CA | 38.0801167 | -119.2713000 | 3271 | na | na | 45  | 2016 | Millar Unpublished |
| 482 | Sierra Nevada   | Mt Dunderberg         | CA | 38.0801333 | -119.2712500 | 3269 | na | na | 45  | 2016 | Millar Unpublished |
| 483 | Sierra Nevada   | Mt Dunderberg         | CA | 38.0866000 | -119.2676000 | 3262 | na | na | 89  | 2016 | Millar Unpublished |
| 484 | Sierra Nevada   | Mt Dunderberg         | CA | 38.0875500 | -119.2780333 | 3370 | na | na | 17  | 2016 | Millar Unpublished |
| 488 | Sierra Nevada   | Granite Lks crest     | CA | 37.9320333 | -119.2798333 | 3428 | na | na | 125 | 2014 | Millar Unpublished |
| 489 | Sierra Nevada   | Rock Creek Cyn        | CA | 37.4046333 | -118.7494833 | 3349 | na | na | 282 | 2009 | Millar Unpublished |
| 490 | Sierra Nevada   | Rock Creek Cyn        | CA | 37.4033333 | -118.7456167 | 3437 | na | na | 15  | 2009 | Millar Unpublished |
| 491 | Sierra Nevada   | Saddlebag Lk, NE side | CA | 37.9824667 | -119.2790167 | 3114 | na | na | 199 | 2016 | Millar Unpublished |
| 493 | Sierra Nevada   | Green Creek Cyn       | CA | 38.1203167 | -119.2735500 | 2671 | na | na | 161 | 2015 | Millar Unpublished |
| 494 | Inyo Craters    | Little Glass Flow     | CA | 37.7485500 | -119.0247833 | 2501 | na | na | 45  | 2015 | Millar Unpublished |
| 495 | Inyo Craters    | Obsidian Dome Flow    | CA | 37.7501833 | -119.0217333 | 2486 | na | na | 188 | 2016 | Millar Unpublished |
| 496 | Sierra Nevada   | Mammoth Crest         | CA | 37.5862833 | -119.0246500 | 3209 | na | na | 290 | 2013 | Millar Unpublished |
| 498 | Sierra Nevada   | Conness tarn          | CA | 37.9753500 | -119.3161333 | 3432 | na | na | 131 | 2013 | Millar Unpublished |
| 499 | Sierra Nevada   | Rt lateral RGC        | CA | 37.9741833 | -119.3165000 | 3441 | na | na | 347 | 2013 | Millar Unpublished |
| 500 | Sierra Nevada   | Medial moraine        | CA | 37.9685333 | -119.3160333 | 3580 | na | na | 28  | 2013 | Millar Unpublished |
| 501 | Sierra Nevada   | Rt lateral RGC        | CA | 37.5558667 | -118.9815167 | 3351 | na | na | 16  | 2013 | Millar Unpublished |
| 506 | Sierra Nevada   | June Lk Loop          | CA | 37.8053667 | -119.1091333 | 2221 | na | na | 304 | 2009 | Millar Unpublished |
| 507 | Sierra Nevada   | June Lk Loop          | CA | 37.8059167 | -119.1092500 | 2191 | na | na | 307 | 2009 | Millar Unpublished |
| 509 | Sierra Nevada   | Gibbs Cyn             | CA | 37.8973500 | -119.1907500 | 3121 | na | na | 2   | 2014 | Millar Unpublished |
| 510 | Sierra Nevada   | Fern Lk               | CA | 37.7456333 | -119.1118000 | 2727 | na | na | 69  | 2015 | Millar Unpublished |
| 511 | Sierra Nevada   | Fern Lk               | CA | 37.7448833 | -119.1079167 | 2715 | na | na | 256 | 2015 | Millar Unpublished |
| 512 | Sierra Nevada   | Lake Cyn              | CA | 37.9927667 | -119.2485667 | 3000 | na | na | 282 | 2016 | Millar Unpublished |
| 513 | Sierra Nevada   | Oneida-Warren Pass    | CA | 37.9847333 | -119.2465167 | 3227 | na | na | 13  | 2016 | Millar Unpublished |
| 514 | Sierra Nevada   | Oneida-Warren Pass    | CA | 37.9844167 | -119.2449833 | 3216 | na | na | 143 | 2016 | Millar Unpublished |
| 515 | Sierra Nevada   | Tioga Pk              | CA | 37.9533167 | -119.2516167 | 3239 | na | na | 341 | 2016 | Millar Unpublished |
| 516 | Sierra Nevada   | Lundy Main Cyn        | CA | 38.0085833 | -119.2893833 | 2822 | na | na | 84  | 2014 | Millar Unpublished |
| 517 | Sierra Nevada   | Lundy Main Cyn        | CA | 38.0087833 | -119.2881500 | 2778 | na | na | 79  | 2014 | Millar Unpublished |
| 518 | Sierra Nevada   | Lundy Main Cyn        | CA | 38.0094667 | -119.2878833 | 2776 | na | na | 101 | 2014 | Millar Unpublished |
| 519 | Sierra Nevada   | Hilton Cyn            | CA | 37.4838333 | -118.7494500 | 3175 | na | na | 34  | 2009 | Millar Unpublished |
| 520 | Sierra Nevada   | Hilton Cyn            | CA | 37.4787500 | -118.7581333 | 3334 | na | na | 322 | 2009 | Millar Unpublished |

|     |                      |                           |    |            |              |      |    |    |     |      |                    |
|-----|----------------------|---------------------------|----|------------|--------------|------|----|----|-----|------|--------------------|
| 521 | Sierra Nevada        | Bohler                    | CA | 37.8949333 | -119.1808167 | 3034 | na | na | 99  | 2009 | Millar Unpublished |
| 522 | Sierra Nevada        | Gibbs Cyn                 | CA | 37.8969833 | -119.1952500 | 3170 | na | na | 38  | 2016 | Millar Unpublished |
| 523 | Sierra Nevada        | Gibbs Cyn                 | CA | 37.8967333 | -119.1806167 | 3006 | na | na | 353 | 2016 | Millar Unpublished |
| 524 | Sierra Nevada        | Lundy Main Cyn            | CA | 38.0178500 | -119.2693000 | 2549 | na | na | 329 | 2016 | Millar Unpublished |
| 526 | Sierra Nevada        | Lee Vining Cyn Upper      | CA | 37.9410333 | -119.2432333 | 2945 | na | na | 180 | 2015 | Millar Unpublished |
| 530 | Sierra Nevada        | Green Creek Cyn           | CA | 38.1211000 | -119.2763000 | 2764 | na | na | 185 | 2015 | Millar Unpublished |
| 531 | Sierra Nevada        | Green Creek Cyn           | CA | 38.1209000 | -119.2729000 | 2690 | na | na | 166 | 2015 | Millar Unpublished |
| 532 | Sierra Nevada        | Lee Vining Cyn Lower      | CA | 37.9303000 | -119.1825333 | 2336 | na | na | 32  | 2016 | Millar Unpublished |
| 534 | Bodie Mountains      | Andrew Smith 1.5 Ore Dump | CA | 38.2109167 | -118.9997333 | 2583 | na | na | 165 | 2010 | Millar Unpublished |
| 535 | Bodie Mountains      | near AS 1.5 Ore dump      | CA | 38.2108333 | -119.0016500 | 2587 | na | na | 143 | 2010 | Millar Unpublished |
| 536 | Wassuk Mountains     | Main Cottonwood Cyn       | NV | 38.5598500 | -118.7937667 | 3156 | na | na | 302 | 2014 | Millar Unpublished |
| 538 | Wassuk Mountains     | Main Cottonwood Cyn       | NV | 38.5628667 | -118.7994667 | 3174 | na | na | 263 | 2014 | Millar Unpublished |
| 539 | Wassuk Mountains     | Mid Fk Cat Cr             | NV | 38.5214333 | -118.7934000 | 2879 | na | na | 139 | 2014 | Millar Unpublished |
| 540 | Wassuk Mountains     | Mid Fk Cat Cr             | NV | 38.5212700 | -118.7929110 | 2869 | na | na | 141 | 2014 | Millar Unpublished |
| 542 | Wassuk Mountains     | North Cottonwood Cyn      | NV | 38.5704000 | -118.7978500 | 3110 | na | na | 255 | 2014 | Millar Unpublished |
| 545 | Wassuk Mountains     | Big Indian Mtn            | NV | 38.4889833 | -118.7916167 | 2968 | na | na | 1   | 2014 | Millar Unpublished |
| 547 | Hart Mountains       | Hart Mtn Refuge           | OR | 42.4654000 | -119.7335167 | 2197 | na | na | 150 | 2010 | Millar Unpublished |
| 551 | Wassuk Mountains     | Mt Grant                  | NV | 38.5674333 | -118.7912000 | 3383 | na | na | 142 | 2014 | Millar Unpublished |
| 552 | Wassuk Mountains     | Mt Grant                  | NV | 38.5678667 | -118.7917500 | 3397 | na | na | 239 | 2014 | Millar Unpublished |
| 554 | Wassuk Mountains     | Cottonwood Drainage       | NV | 38.5661167 | -118.8015000 | 3080 | na | na | 250 | 2014 | Millar Unpublished |
| 557 | Wassuk Mountains     | Dutch Cr Cyn              | NV | 38.5795000 | -118.7914167 | 3176 | na | na | 14  | 2014 | Millar Unpublished |
| 558 | Wassuk Mountains     | Dutch Cr Cyn              | NV | 38.5855000 | -118.7895333 | 2918 | na | na | 341 | 2014 | Millar Unpublished |
| 560 | Wassuk Mountains     | Dutch Cr Cyn              | NV | 38.5827500 | -118.7896833 | 3085 | na | na | 334 | 2014 | Millar Unpublished |
| 561 | Sierra Nevada        | McGee Cyn                 | CA | 37.5328500 | -118.8212667 | 2653 | na | na | 345 | 2010 | Millar Unpublished |
| 565 | Bodie Mountains      | Masonic Site              | CA | 38.3597500 | -119.1279000 | 2581 | na | na | 348 | 2017 | Millar Unpublished |
| 566 | Bodie Mountains      | Masonic Site              | CA | 38.3606167 | -119.1262167 | 2556 | na | na | 353 | 2017 | Millar Unpublished |
| 567 | Sierra Nevada        | Bennettville              | CA | 37.9365500 | -119.2617833 | 2993 | na | na | 49  | 2016 | Millar Unpublished |
| 568 | Sierra Nevada        | Hall RNA                  | CA | 37.9454450 | -119.2755280 | 3052 | na | na | 22  | 2016 | Millar Unpublished |
| 570 | Sweetwater Mountains | Mt Wheeler                | CA | 38.4080000 | -119.2821500 | 3286 | na | na | 207 | 2010 | Millar Unpublished |
| 571 | Sweetwater Mountains | Belfort Town Site         | CA | 38.4166167 | -119.2694667 | 3122 | na | na | 45  | 2015 | Millar Unpublished |
| 572 | Sweetwater Mountains | Belfort Town Site         | CA | 38.4176500 | -119.2685167 | 3111 | na | na | 124 | 2015 | Millar Unpublished |
| 573 | Sweetwater Mountains | Belfort Town Site         | CA | 38.4185000 | -119.2674667 | 3116 | na | na | 116 | 2015 | Millar Unpublished |
| 574 | Sweetwater Mountains | Belfort Town Site         | CA | 38.4090333 | -119.2769167 | 3248 | na | na | 185 | 2015 | Millar Unpublished |
| 575 | Sweetwater Mountains | Above Boulder Flat        | CA | 38.4213167 | -119.2685167 | 3160 | na | na | 123 | 2015 | Millar Unpublished |
| 576 | Sweetwater Mountains | Boulder Flat area         | CA | 38.4101000 | -119.2788833 | 3263 | na | na | 103 | 2015 | Millar Unpublished |
| 577 | Sweetwater Mountains | Ferris Cyn                | CA | 38.4256500 | -119.2754833 | 3239 | na | na | 30  | 2015 | Millar Unpublished |
| 578 | Sweetwater Mountains | Frying Pan Cyn            | CA | 38.4047500 | -119.2793167 | 3174 | na | na | 358 | 2015 | Millar Unpublished |
| 579 | Sweetwater Mountains | Frying Pan Cyn            | CA | 38.4086333 | -119.2764167 | 3215 | na | na | 181 | 2015 | Millar Unpublished |
| 580 | Sierra Nevada        | Warren Fork Cyn           | CA | 37.9568833 | -119.2367667 | 2855 | na | na | 21  | 2016 | Millar Unpublished |
| 582 | Sierra Nevada        | Warren Fork Cyn           | CA | 37.9632500 | -119.2421333 | 2924 | na | na | 145 | 2016 | Millar Unpublished |
| 583 | New Range            | Rickey Pk Ridge           | CA | 38.2752000 | -119.3606500 | 2757 | na | na | 39  | 2010 | Millar Unpublished |
| 584 | New Range            | Rickey Pk Ridge           | CA | 38.2750333 | -119.3609167 | 2771 | na | na | 37  | 2010 | Millar Unpublished |
| 585 | New Range            | Rickey Pk Ridge           | CA | 38.2745167 | -119.3614000 | 2804 | na | na | 37  | 2010 | Millar Unpublished |
| 586 | New Range            | Rickey Pk Ridge           | CA | 38.2737667 | -119.3622000 | 2865 | na | na | 37  | 2010 | Millar Unpublished |
| 587 | New Range            | Rickey Pk Ridge           | CA | 38.2755500 | -119.3552000 | 2612 | na | na | 168 | 2010 | Millar Unpublished |
| 588 | New Range            | Rickey Pk Ridge           | CA | 38.2738333 | -119.3550000 | 2469 | na | na | 68  | 2010 | Millar Unpublished |
| 590 | Sierra Nevada        | Parker Lk                 | CA | 37.8308833 | -119.1589333 | 2609 | na | na | 334 | 2016 | Millar Unpublished |
| 601 | Sierra Nevada        | Kavanaugh Crest           | CA | 38.0985833 | -119.2702500 | 3097 | na | na | 329 | 2016 | Millar Unpublished |
| 602 | Sierra Nevada        | Kavanaugh Crest           | CA | 38.0963667 | -119.2722333 | 3171 | na | na | 23  | 2016 | Millar Unpublished |

|     |                      |                         |    |            |              |      |    |    |     |      |                    |
|-----|----------------------|-------------------------|----|------------|--------------|------|----|----|-----|------|--------------------|
| 603 | Sierra Nevada        | Lundy Cyn               | CA | 38.0749167 | -119.2617333 | 3184 | na | na | 331 | 2016 | Millar Unpublished |
| 604 | Sweetwater Mountains | Frying Pan Cyn          | CA | 38.4083333 | -119.2583333 | 3200 | na | na | 45  | 2014 | Millar Unpublished |
| 606 | Sierra Nevada        | Dunderberg              | CA | 38.0810333 | -119.2600333 | 3125 | na | na | 53  | 2016 | Millar Unpublished |
| 607 | Sierra Nevada        | State Rocks             | CA | 38.0755833 | -119.2469667 | 3093 | na | na | 26  | 2016 | Millar Unpublished |
| 608 | Sierra Nevada        | Green Cr Cyn            | CA | 38.0707000 | -119.2985000 | 2897 | na | na | 324 | 2013 | Millar Unpublished |
| 609 | Sierra Nevada        | Buckeye Cyn             | CA | 38.2345167 | -119.4069833 | 2666 | na | na | 32  | 2010 | Millar Unpublished |
| 610 | Sierra Nevada        | Buckeye Cyn             | CA | 38.2231667 | -119.4374833 | 3314 | na | na | 349 | 2010 | Millar Unpublished |
| 611 | Sierra Nevada        | Buckeye Cyn             | CA | 38.2135333 | -119.4328833 | 2909 | na | na | 155 | 2010 | Millar Unpublished |
| 612 | Sierra Nevada        | Burt Cyn                | CA | 38.2223833 | -119.4864000 | 2837 | na | na | 274 | 2010 | Millar Unpublished |
| 613 | Sierra Nevada        | Burt Cyn                | CA | 38.2099667 | -119.4780000 | 3071 | na | na | 251 | 2010 | Millar Unpublished |
| 614 | Sierra Nevada        | Burt Cyn                | CA | 38.2070500 | -119.4737000 | 3227 | na | na | 220 | 2010 | Millar Unpublished |
| 615 | Sierra Nevada        | Burt Cyn                | CA | 38.2055667 | -119.4968500 | 3142 | na | na | 122 | 2010 | Millar Unpublished |
| 616 | Sierra Nevada        | Burt Cyn                | CA | 38.2089667 | -119.4991167 | 3170 | na | na | 95  | 2010 | Millar Unpublished |
| 617 | Sierra Nevada        | Burt Cyn                | CA | 38.1956167 | -119.5025667 | 3509 | na | na | 90  | 2010 | Millar Unpublished |
| 618 | Sierra Nevada        | Molybdenite Cyn         | CA | 38.2561833 | -119.4430167 | 2805 | na | na | 46  | 2014 | Millar Unpublished |
| 619 | Sierra Nevada        | Molybdenite Cyn         | CA | 38.2562167 | -119.4441167 | 2847 | na | na | 70  | 2014 | Millar Unpublished |
| 621 | Sierra Nevada        | Molybdenite Cyn         | CA | 38.2388667 | -119.4354333 | 2842 | na | na | 288 | 2014 | Millar Unpublished |
| 622 | Sierra Nevada        | Molybdenite Cyn         | CA | 38.2395333 | -119.4353667 | 2837 | na | na | 266 | 2014 | Millar Unpublished |
| 623 | White Mountains      | Queen Cyn               | NV | 37.8859167 | -118.3150167 | 2939 | na | na | 327 | 2015 | Millar Unpublished |
| 624 | White Mountains      | Queen Cyn               | NV | 37.8838333 | -118.3160500 | 2966 | na | na | 270 | 2015 | Millar Unpublished |
| 625 | Sierra Nevada        | Mammoth Lks Basin       | CA | 37.6131667 | -119.0010500 | 2755 | na | na | 319 | 2010 | Millar Unpublished |
| 638 | Glass Mountains      | Cougar Peak             | OR | 42.3103333 | -120.6386500 | 2228 | na | na | 315 | 2010 | Millar Unpublished |
| 639 | Glass Mountains      | Cougar Peak             | OR | 42.3088000 | -120.6359167 | 2323 | na | na | 305 | 2010 | Millar Unpublished |
| 642 | Glass Mountains      | Cougar Peak             | OR | 42.3096333 | -120.6383667 | 2243 | na | na | 264 | 2010 | Millar Unpublished |
| 643 | Glass Mountains      | Cougar Peak             | OR | 42.3084833 | -120.6386167 | 2233 | na | na | 264 | 2010 | Millar Unpublished |
| 644 | Glass Mountains      | Cougar Peak             | OR | 42.3070333 | -120.6304167 | 2413 | na | na | 29  | 2010 | Millar Unpublished |
| 645 | Glass Mountains      | Cougar Peak             | OR | 42.3101500 | -120.6386333 | 2232 | na | na | 298 | 2010 | Millar Unpublished |
| 646 | Glass Mountains      | Cougar Peak             | OR | 42.3100000 | -120.6383333 | 2240 | na | na | 306 | 2010 | Millar Unpublished |
| 647 | Hart Mountains       | above Hilltop Reservoir | OR | 42.5579667 | -119.7023333 | 1835 | na | na | 65  | 2010 | Millar Unpublished |
| 648 | Hart Mountains       | above Hilltop Reservoir | OR | 42.5580333 | -119.7031667 | 1858 | na | na | 68  | 2010 | Millar Unpublished |
| 652 | White Mountains      | Cottonwood Drainage     | CA | 37.5511000 | -118.2250333 | 3573 | na | na | 42  | 2013 | Millar Unpublished |
| 653 | White Mountains      | Cottonwood Drainage     | CA | 37.5507000 | -118.2262167 | 3591 | na | na | 332 | 2013 | Millar Unpublished |
| 654 | White Mountains      | Cottonwood Drainage     | CA | 37.6334333 | -118.2254500 | 3595 | na | na | 352 | 2013 | Millar Unpublished |
| 655 | White Mountains      | Schulman Grove          | CA | 37.4027500 | -118.1770167 | 3119 | na | na | 75  | 2015 | Millar Unpublished |
| 656 | White Mountains      | Schulman Grove          | CA | 37.4064833 | -118.1744500 | 3093 | na | na | 322 | 2015 | Millar Unpublished |
| 657 | White Mountains      | Schulman Grove          | CA | 37.4070000 | -118.1739167 | 3104 | na | na | 315 | 2015 | Millar Unpublished |
| 658 | Sierra Nevada        | Buckeye Cyn             | CA | 38.2085667 | -119.4302833 | 2612 | na | na | 152 | 2015 | Millar Unpublished |
| 661 | Sierra Nevada        | Bloody Cyn              | CA | 37.8661333 | -119.1673667 | 2627 | na | na | 104 | 2015 | Millar Unpublished |
| 662 | Sierra Nevada        | Bloody Cyn              | CA | 37.8646500 | -119.1688167 | 2656 | na | na | 89  | 2015 | Millar Unpublished |
| 663 | Sierra Nevada        | Bloody Cyn              | CA | 37.8629500 | -119.1719833 | 2781 | na | na | 347 | 2015 | Millar Unpublished |
| 664 | Sierra Nevada        | Bloody Cyn              | CA | 37.8614000 | -119.1747833 | 2838 | na | na | 353 | 2015 | Millar Unpublished |
| 668 | Sierra Nevada        | Tamarack Crest          | CA | 38.1436667 | -119.3131333 | 2746 | na | na | 2   | 2015 | Millar Unpublished |
| 669 | Sierra Nevada        | Tamarack Crest          | CA | 38.1383833 | -119.3120667 | 2932 | na | na | 12  | 2015 | Millar Unpublished |
| 670 | Sierra Nevada        | Tamarack Crest          | CA | 38.1345667 | -119.3108500 | 3020 | na | na | 355 | 2015 | Millar Unpublished |
| 671 | Sierra Nevada        | Tamarack Crest          | CA | 38.1275000 | -119.3064500 | 3184 | na | na | 4   | 2015 | Millar Unpublished |
| 672 | Sierra Nevada        | Deer RGC                | CA | 37.5562333 | -118.9867000 | 3345 | na | na | 332 | 2013 | Millar Unpublished |
| 673 | Toquima Range        | Smost Fk Pine Cr        | NV | 38.7603333 | -116.9189000 | 3219 | na | na | 340 | 2015 | Millar Unpublished |
| 674 | Toquima Range        | Smost Fk Pine Cr        | NV | 38.7585500 | -116.9231833 | 3279 | na | na | 23  | 2015 | Millar Unpublished |
| 675 | Toquima Range        | Tamarack Fk Pine Cr     | NV | 38.7739167 | -116.9338000 | 3301 | na | na | 162 | 2015 | Millar Unpublished |

|     |                    |                         |    |            |              |      |    |    |     |      |                    |
|-----|--------------------|-------------------------|----|------------|--------------|------|----|----|-----|------|--------------------|
| 677 | Toquima Range      | Tamarack Fk Pine Cr     | NV | 38.7764500 | -116.9310333 | 3404 | na | na | 190 | 2015 | Millar Unpublished |
| 678 | Toquima Range      | Tamarack Fk Pine Cr     | NV | 38.7702833 | -116.9187000 | 3149 | na | na | 16  | 2015 | Millar Unpublished |
| 679 | Toquima Range      | Tamarack Fk Pine Cr     | NV | 38.7706167 | -116.9208833 | 3150 | na | na | 17  | 2015 | Millar Unpublished |
| 680 | Toquima Range      | Plateau above N Fk Cyn  | NV | 38.7872833 | -116.9341833 | 3463 | na | na | 200 | 2015 | Millar Unpublished |
| 681 | Toquima Range      | Tamarack Fk Pine Cr     | NV | 38.7704833 | -116.9187833 | 3142 | na | na | 16  | 2015 | Millar Unpublished |
| 682 | Toquima Range      | Tamarack Fk Pine Cr     | NV | 38.7704167 | -116.9188833 | 3152 | na | na | 16  | 2015 | Millar Unpublished |
| 683 | Toquima Range      | Tamarack Fk Pine Cr     | NV | 38.7702000 | -116.9195500 | 3162 | na | na | 9   | 2015 | Millar Unpublished |
| 687 | Glass Mountains    | Cougar Peak             | OR | 42.3084833 | -120.6370667 | 2281 | na | na | 255 | 2010 | Millar Unpublished |
| 690 | White Mountains    | Above Enfield Arch Site | CA | 37.4855500 | -118.1882833 | 3184 | na | na | 28  | 2016 | Millar Unpublished |
| 703 | Bodie Mountains    | Masonic Mtn             | CA | 38.3468000 | -119.1442833 | 2680 | na | na | 324 | 2017 | Millar Unpublished |
| 704 | Bodie Mountains    | Masonic Mtn             | CA | 38.3465833 | -119.1443500 | 2687 | na | na | 332 | 2017 | Millar Unpublished |
| 720 | Sierra Nevada      | Laurel Mtn              | CA | 37.5882667 | -118.9053000 | 3167 | na | na | 210 | 2011 | Millar Unpublished |
| 721 | Sierra Nevada      | Laurel Mtn              | CA | 37.5996000 | -118.9096500 | 2785 | na | na | 246 | 2011 | Millar Unpublished |
| 722 | Sierra Nevada      | Laurel/Bloody Moraine   | CA | 37.5969000 | -118.9115000 | 2729 | na | na | 263 | 2011 | Millar Unpublished |
| 723 | Zunnamed Mountains | Monitor Pass Range      | CA | 38.6814000 | -119.6111833 | 2694 | na | na | 108 | 2014 | Millar Unpublished |
| 724 | Zunnamed Mountains | Monitor Pass Range      | CA | 38.6828667 | -119.6112500 | 2716 | na | na | 95  | 2014 | Millar Unpublished |
| 725 | Sierra Nevada      | Virginia Lks Cyn        | CA | 38.0465167 | -119.2571667 | 2976 | na | na | 311 | 2016 | Millar Unpublished |
| 726 | Sierra Nevada      | Virginia Lks Cyn        | CA | 38.0458500 | -119.2549500 | 2999 | na | na | 338 | 2016 | Millar Unpublished |
| 727 | Sierra Nevada      | Virginia Lks Cyn        | CA | 38.0456167 | -119.2511667 | 3025 | na | na | 353 | 2016 | Millar Unpublished |
| 728 | Sierra Nevada      | Lundy Main Cyn          | CA | 38.0395833 | -119.2513000 | 3263 | na | na | 182 | 2016 | Millar Unpublished |
| 729 | Sierra Nevada      | E Fk Rock Cr            | CA | 37.4321667 | -118.7186833 | 3321 | na | na | 307 | 2011 | Millar Unpublished |
| 730 | Sierra Nevada      | Green Cr                | CA | 38.1233667 | -119.2570167 | 2603 | na | na | 153 | 2014 | Millar Unpublished |
| 731 | Sierra Nevada      | Green Cr                | CA | 38.1221667 | -119.2687833 | 2699 | na | na | 156 | 2014 | Millar Unpublished |
| 732 | Sierra Nevada      | Green Cr                | CA | 38.1213000 | -119.2712333 | 2702 | na | na | 166 | 2014 | Millar Unpublished |
| 733 | Sierra Nevada      | Virginia Lks Cyn        | CA | 38.0507833 | -119.2815000 | 3159 | na | na | 166 | 2016 | Millar Unpublished |
| 734 | Sierra Nevada      | Sonora Pass             | CA | 38.3325833 | -119.5504167 | 2188 | na | na | 35  | 2011 | Millar Unpublished |
| 735 | Sierra Nevada      | Warren Fork Cyn         | CA | 37.9604833 | -119.2418833 | 2896 | na | na | 135 | 2015 | Millar Unpublished |
| 737 | Sierra Nevada      | Dore Pass               | CA | 37.9929333 | -119.2663833 | 3600 | na | na | 316 | 2016 | Millar Unpublished |
| 738 | Sierra Nevada      | Warren ForkCyn E Fork   | CA | 37.9760667 | -119.2454167 | 3062 | na | na | 141 | 2011 | Millar Unpublished |
| 739 | Sierra Nevada      | Virginia Lks Cyn        | CA | 38.0403667 | -119.2873833 | 3310 | na | na | 331 | 2016 | Millar Unpublished |
| 740 | Sierra Nevada      | Saddlebag Lk            | CA | 37.9746500 | -119.2725333 | 3091 | na | na | 202 | 2016 | Millar Unpublished |
| 744 | Sierra Nevada      | Bloody Cyn              | CA | 37.8629333 | -119.1835000 | 2636 | na | na | 1   | 2011 | Millar Unpublished |
| 745 | Sierra Nevada      | Bloody Cyn              | CA | 37.8614167 | -119.1985500 | 2991 | na | na | 83  | 2011 | Millar Unpublished |
| 746 | Sierra Nevada      | Bloody Cyn              | CA | 37.8606833 | -119.2045000 | 3112 | na | na | 184 | 2011 | Millar Unpublished |
| 747 | Sierra Nevada      | Bloody Cyn              | CA | 37.8593000 | -119.2064500 | 3170 | na | na | 26  | 2011 | Millar Unpublished |
| 748 | Sierra Nevada      | Bloody Cyn              | CA | 37.8594667 | -119.1989333 | 2996 | na | na | 36  | 2011 | Millar Unpublished |
| 749 | Sierra Nevada      | Bloody Cyn              | CA | 37.8574000 | -119.2090500 | 3207 | na | na | 87  | 2011 | Millar Unpublished |
| 750 | Sierra Nevada      | Dunderberg              | CA | 38.0749167 | -119.2617000 | 3164 | na | na | 331 | 2016 | Millar Unpublished |
| 751 | Sierra Nevada      | Dunderberg              | CA | 38.0744333 | -119.2633667 | 3191 | na | na | 78  | 2016 | Millar Unpublished |
| 752 | Sierra Nevada      | Saddlebag Lk region     | CA | 37.9774167 | -119.2921833 | 3092 | na | na | 351 | 2016 | Millar Unpublished |
| 755 | Toquima Range      | Tamarack Fk Pine Cr     | NV | 38.7719000 | -116.9309333 | 3280 | na | na | 94  | 2015 | Millar Unpublished |
| 756 | Toquima Range      | Tamarack Fk Pine Cr     | NV | 38.7760000 | -116.9332500 | 3357 | na | na | 197 | 2015 | Millar Unpublished |
| 757 | Mono Craters       | N Coulee                | CA | 37.9105667 | -119.0270000 | 2317 | na | na | 281 | 2013 | Millar Unpublished |
| 758 | Mono Craters       | N Coulee                | CA | 37.9107667 | -119.0270833 | 2313 | na | na | 281 | 2013 | Millar Unpublished |
| 761 | Mono Craters       | N Coulee                | CA | 37.9057333 | -119.0236833 | 2323 | na | na | 149 | 2013 | Millar Unpublished |
| 767 | Sierra Nevada      | Sonora Pass             | CA | 38.3650833 | -119.4844167 | 2038 | na | na | 349 | 2011 | Millar Unpublished |
| 768 | Sierra Nevada      | Sonora Pass             | CA | 38.3649667 | -119.4843167 | 2042 | na | na | 345 | 2011 | Millar Unpublished |
| 769 | Sierra Nevada      | Sonora Pass             | CA | 38.3641000 | -119.4851667 | 2060 | na | na | 327 | 2011 | Millar Unpublished |
| 770 | Sierra Nevada      | Mammoth Crest           | CA | 37.5609667 | -118.9803333 | 3394 | na | na | 159 | 2011 | Millar Unpublished |

|     |                      |                    |    |            |              |      |    |    |     |      |                    |
|-----|----------------------|--------------------|----|------------|--------------|------|----|----|-----|------|--------------------|
| 771 | Sierra Nevada        | Virg Lks Pass      | CA | 38.0432167 | -119.2996833 | 3279 | na | na | 252 | 2016 | Millar Unpublished |
| 785 | Sweetwater Mountains | Swanger Cr Cyn     | CA | 38.4185000 | -119.3446500 | 3027 | na | na | 179 | 2012 | Millar Unpublished |
| 786 | Sierra Nevada        | Lee Vining Cyn     | CA | 37.9438167 | -119.2503667 | 3049 | na | na | 209 | 2014 | Millar Unpublished |
| 787 | Sierra Nevada        | Dana Plateau       | CA | 37.9033167 | -119.2096667 | 3769 | na | na | 42  | 2016 | Millar Unpublished |
| 788 | Sierra Nevada        | Benjamin Buttes    | CA | 38.0802500 | -119.2283000 | 2749 | na | na | 119 | 2016 | Millar Unpublished |
| 791 | Sweetwater Mountains | Star City          | CA | 38.4103667 | -119.2556667 | 2831 | na | na | 145 | 2015 | Millar Unpublished |
| 792 | Sweetwater Mountains | Belfort Town Site  | CA | 38.4164833 | -119.2663167 | 3104 | na | na | 206 | 2015 | Millar Unpublished |
| 793 | Sweetwater Mountains | Boulder Flat       | CA | 38.4179833 | -119.2643333 | 3127 | na | na | 259 | 2015 | Millar Unpublished |
| 794 | Sweetwater Mountains | Boulder Flat       | CA | 38.4183167 | -119.2638000 | 3128 | na | na | 59  | 2015 | Millar Unpublished |
| 795 | Sweetwater Mountains | Boulder Flat       | CA | 38.4197667 | -119.2639000 | 3104 | na | na | 339 | 2015 | Millar Unpublished |
| 796 | Sweetwater Mountains | Above Belfort      | CA | 38.4140833 | -119.2673667 | 3138 | na | na | 112 | 2015 | Millar Unpublished |
| 797 | Sierra Nevada        | State Rocks        | CA | 38.0797000 | -119.2453000 | 3005 | na | na | 50  | 2016 | Millar Unpublished |
| 798 | Sierra Nevada        | State Rocks        | CA | 38.0752000 | -119.2465333 | 3097 | na | na | 33  | 2016 | Millar Unpublished |
| 799 | Sierra Nevada        | Conness cirque     | CA | 37.9751833 | -119.3132667 | 3331 | na | na | 123 | 2016 | Millar Unpublished |
| 800 | Sweetwater Mountains | Belfort Region     | CA | 38.4095667 | -119.2810667 | 3347 | na | na | 22  | 2012 | Millar Unpublished |
| 801 | Sweetwater Mountains | Belfort Region     | CA | 38.4094333 | -119.2767333 | 3246 | na | na | 181 | 2012 | Millar Unpublished |
| 803 | Sierra Nevada        | Greenstone Lk      | CA | 37.9775167 | -119.2916667 | 3091 | na | na | 346 | 2016 | Millar Unpublished |
| 804 | Sierra Nevada        | Greenstone Lk      | CA | 37.9772833 | -119.2923333 | 3086 | na | na | 352 | 2016 | Millar Unpublished |
| 805 | White Mountains      | County Line Hill   | CA | 37.4785833 | -118.1872167 | 3230 | na | na | 310 | 2015 | Millar Unpublished |
| 806 | White Mountains      | County Line Hill   | CA | 37.4790000 | -118.1869500 | 3228 | na | na | 312 | 2015 | Millar Unpublished |
| 807 | White Mountains      | County Line Hill   | CA | 37.4857167 | -118.1824667 | 3193 | na | na | 308 | 2015 | Millar Unpublished |
| 809 | White Mountains      | Patriarch Grove    | CA | 37.5301333 | -118.2030333 | 3530 | na | na | 116 | 2015 | Millar Unpublished |
| 811 | White Mountains      | Wyman Canyon       | CA | 37.4376000 | -118.1512500 | 2712 | na | na | 177 | 2016 | Millar Unpublished |
| 816 | Sierra Nevada        | Lundy Cyn          | CA | 38.0403167 | -119.2190167 | 2625 | na | na | 201 | 2016 | Millar Unpublished |
| 820 | Sweetwater Mountains | Electronic Site    | CA | 38.3890333 | -119.3646667 | 3009 | na | na | 31  | 2015 | Millar Unpublished |
| 822 | Ruby Mountains       | Lamoille Cyn       | NV | 40.5893500 | -115.3917500 | 3076 | na | na | 355 | 2012 | Millar Unpublished |
| 823 | Ruby Mountains       | Lamoille Cyn       | NV | 40.5866500 | -115.3936167 | 3178 | na | na | 278 | 2012 | Millar Unpublished |
| 824 | Ruby Mountains       | Lamoille area      | NV | 40.5857667 | -115.3930167 | 3168 | na | na | 193 | 2012 | Millar Unpublished |
| 825 | Ruby Mountains       | Lamoille area      | NV | 40.5811500 | -115.3932167 | 3056 | na | na | 286 | 2012 | Millar Unpublished |
| 826 | Ruby Mountains       | Lamoille area      | NV | 40.5819333 | -115.3929833 | 3066 | na | na | 280 | 2012 | Millar Unpublished |
| 827 | Ruby Mountains       | Lamoille area      | NV | 40.5723500 | -115.4008333 | 2912 | na | na | 14  | 2012 | Millar Unpublished |
| 828 | Ruby Mountains       | Lamoille area      | NV | 40.5668833 | -115.4014660 | 2992 | na | na | 6   | 2012 | Millar Unpublished |
| 829 | Ruby Mountains       | Lamoille area      | NV | 40.5669667 | -115.4018500 | 2999 | na | na | 41  | 2012 | Millar Unpublished |
| 830 | Ruby Mountains       | Lamoille area      | NV | 40.5763167 | -115.3889833 | 3107 | na | na | 62  | 2012 | Millar Unpublished |
| 831 | Ruby Mountains       | Lamoille Cyn       | NV | 40.6147500 | -115.3824000 | 2945 | na | na | -1  | 2012 | Millar Unpublished |
| 832 | Ruby Mountains       | Lamoille Cyn       | NV | 40.6147667 | -115.3831167 | 2955 | na | na | 99  | 2012 | Millar Unpublished |
| 833 | Uinta Mountains      | Hayden Pass        | UT | 40.7274333 | -110.8916000 | 3324 | na | na | 145 | 2012 | Millar Unpublished |
| 834 | Uinta Mountains      | Hayden Pass        | UT | 40.7288833 | -110.8939333 | 3298 | na | na | 212 | 2012 | Millar Unpublished |
| 835 | Uinta Mountains      | Hayden Pass        | UT | 40.7287500 | -110.8935167 | 3310 | na | na | 232 | 2012 | Millar Unpublished |
| 836 | Uinta Mountains      | Long Lk            | UT | 40.6807500 | -110.9967833 | 3082 | na | na | 158 | 2012 | Millar Unpublished |
| 837 | Uinta Mountains      | Bald Pass          | UT | 40.6898500 | -110.9054500 | 3288 | na | na | 183 | 2012 | Millar Unpublished |
| 838 | Uinta Mountains      | Bald Pass          | UT | 40.6896667 | -110.9054500 | 3288 | na | na | 182 | 2012 | Millar Unpublished |
| 839 | Uinta Mountains      | Provo River        | UT | 40.5792000 | -111.0397167 | 2406 | na | na | 197 | 2012 | Millar Unpublished |
| 843 | Sweetwater Mountains | Electronic Site    | CA | 38.3949333 | -119.3746667 | 2900 | na | na | 293 | 2015 | Millar Unpublished |
| 844 | Sweetwater Mountains | Electronic Site    | CA | 38.3948667 | -119.3745500 | 2924 | na | na | 293 | 2015 | Millar Unpublished |
| 845 | Sweetwater Mountains | Electronic Site    | CA | 38.3951000 | -119.3745667 | 2917 | na | na | 300 | 2015 | Millar Unpublished |
| 846 | Sierra Nevada        | Rock Cr Cyn        | CA | 37.4535667 | -118.7570000 | 3296 | na | na | 164 | 2014 | Millar Unpublished |
| 849 | Inyo Craters         | Obsidian Dome Flow | CA | 37.7518667 | -119.0142333 | 2471 | na | na | 139 | 2015 | Millar Unpublished |
| 850 | Inyo Craters         | Obsidian Dome Flow | CA | 37.7525000 | -119.0136167 | 2477 | na | na | 145 | 2015 | Millar Unpublished |

|     |                      |                               |    |            |              |      |    |    |     |      |                    |
|-----|----------------------|-------------------------------|----|------------|--------------|------|----|----|-----|------|--------------------|
| 851 | Inyo Craters         | Obsidian Dome Flow            | CA | 37.7504167 | -119.0170000 | 2486 | na | na | 136 | 2015 | Millar Unpublished |
| 852 | Sierra Nevada        | Lake Cyn                      | CA | 38.0166333 | -119.2412500 | 2701 | na | na | 291 | 2016 | Millar Unpublished |
| 853 | Mono Craters         | NE Coulee                     | CA | 37.9115667 | -118.9985167 | 2092 | na | na | 5   | 2013 | Millar Unpublished |
| 854 | Mono Craters         | NE Coulee                     | CA | 37.9109333 | -119.0014000 | 2100 | na | na | 340 | 2013 | Millar Unpublished |
| 856 | Sweetwater Mountains | Sweetwater Cyn                | CA | 38.4523000 | -119.2748167 | 3033 | na | na | 324 | 2015 | Millar Unpublished |
| 857 | White Mountains      | Wyman Canyon                  | CA | 37.4588167 | -118.1934000 | 3106 | na | na | 219 | 2016 | Millar Unpublished |
| 858 | White Mountains      | Lower Cell Phone Ridge        | CA | 37.3662333 | -118.1886000 | 2889 | na | na | 300 | 2015 | Millar Unpublished |
| 859 | White Mountains      | Lower Cell Phone Ridge        | CA | 37.3665667 | -118.1884500 | 2878 | na | na | 289 | 2015 | Millar Unpublished |
| 860 | White Mountains      | County Line Hill              | CA | 37.4783333 | -118.1897667 | 3227 | na | na | 322 | 2016 | Millar Unpublished |
| 866 | Sierra Nevada        | Glacier Cyn                   | CA | 37.9129000 | -119.2238500 | 3368 | na | na | 212 | 2015 | Millar Unpublished |
| 867 | Sierra Nevada        | Glacier Cyn                   | CA | 37.9051667 | -119.2256333 | 3427 | na | na | 25  | 2015 | Millar Unpublished |
| 868 | Sierra Nevada        | Kavanaugh Crest               | CA | 38.0801333 | -119.2713167 | 3277 | na | na | 45  | 2016 | Millar Unpublished |
| 871 | Sierra Nevada        | Tioga Crest                   | CA | 37.9543833 | -119.2611833 | 3097 | na | na | 213 | 2016 | Millar Unpublished |
| 872 | Inyo Craters         | Glass Flow Dome               | CA | 37.7472000 | -119.0199000 | 2526 | na | na | 349 | 2015 | Millar Unpublished |
| 873 | Inyo Craters         | Glass Flow Dome               | CA | 37.7467667 | -119.0219333 | 2503 | na | na | 344 | 2015 | Millar Unpublished |
| 874 | Inyo Craters         | Glass Flow Dome               | CA | 37.7467500 | -119.0225000 | 2501 | na | na | 351 | 2015 | Millar Unpublished |
| 875 | East Humboldt Range  | Smith Lake                    | NV | 41.0322667 | -115.0948333 | 2798 | na | na | 331 | 2016 | Millar Unpublished |
| 876 | Sierra Nevada        | Convict Basin                 | CA | 37.5467333 | -118.8756833 | 2993 | na | na | 38  | 2013 | Millar Unpublished |
| 877 | Wassuk Mountains     | Corey Pk E (TV Hill)          | NV | 38.4562833 | -118.7614833 | 3072 | na | na | 54  | 2015 | Millar Unpublished |
| 878 | Wassuk Mountains     | Corey Pk N asp                | NV | 38.4598500 | -118.7717667 | 2768 | na | na | 321 | 2015 | Millar Unpublished |
| 879 | Toquima Range        | Tamarack Fk Pine Cr           | NV | 38.7711833 | -116.9276833 | 3223 | na | na | 106 | 2015 | Millar Unpublished |
| 882 | Sierra Nevada        | Gibbs Cyn                     | CA | 37.9021333 | -119.1735833 | 2839 | na | na | 2   | 2016 | Millar Unpublished |
| 883 | Sierra Nevada        | Gibbs Cyn                     | CA | 37.9040000 | -119.1823667 | 2917 | na | na | 151 | 2016 | Millar Unpublished |
| 884 | Sierra Nevada        | Rock Cr Cyn                   | CA | 37.4178667 | -118.7476667 | 3245 | na | na | 248 | 2014 | Millar Unpublished |
| 885 | Sierra Nevada        | Kavenanugh Crest              | CA | 38.0748167 | -119.2735000 | 3335 | na | na | 353 | 2016 | Millar Unpublished |
| 886 | Toquima Range        | Tamarack Fk Pine Cr           | NV | 38.7756500 | -116.9305667 | 3350 | na | na | 172 | 2015 | Millar Unpublished |
| 887 | Toquima Range        | Tamarack Fk Pine Cr           | NV | 38.7723333 | -116.9308167 | 3356 | na | na | 105 | 2015 | Millar Unpublished |
| 888 | Toquima Range        | Moores Creek Cyn              | NV | 38.8314833 | -116.9010500 | 2861 | na | na | 345 | 2014 | Millar Unpublished |
| 889 | Toquima Range        | Moores Creek Cyn              | NV | 38.8149000 | -116.9294500 | 3168 | na | na | 335 | 2014 | Millar Unpublished |
| 890 | White Mountains      | Crooked Creek                 | CA | 37.5067833 | -118.1592333 | 3053 | na | na | 185 | 2016 | Millar Unpublished |
| 891 | Sierra Nevada        | Green Cr Cyn                  | CA | 38.0912667 | -119.3178000 | 3018 | na | na | 203 | 2014 | Millar Unpublished |
| 892 | Sierra Nevada        | Green Cr Cyn                  | CA | 38.0924000 | -119.3146833 | 2900 | na | na | 150 | 2014 | Millar Unpublished |
| 893 | Sierra Nevada        | Hall Research Natural Area    | CA | 37.9516500 | -119.2892000 | 3120 | na | na | 1   | 2016 | Millar Unpublished |
| 894 | Sierra Nevada        | Hall Research Natural Area    | CA | 37.9359333 | -119.2617833 | 2753 | na | na | 35  | 2016 | Millar Unpublished |
| 895 | Sierra Nevada        | Hall Research Natural Area    | CA | 37.9365333 | -119.2619333 | 2989 | na | na | 49  | 2016 | Millar Unpublished |
| 896 | Sierra Nevada        | Hall Research Natural Area    | CA | 37.9487833 | -119.2875000 | 3165 | na | na | 81  | 2016 | Millar Unpublished |
| 897 | Sierra Nevada        | Mt Rose                       | NV | 39.3151333 | -119.9030833 | 2798 | na | na | 351 | 2014 | Millar Unpublished |
| 898 | East Humboldt Range  | Angel Lake                    | NV | 41.0310667 | -115.0866333 | 2688 | na | na | 114 | 2016 | Millar Unpublished |
| 901 | Sierra Nevada        | Little Walker River Watershed | CA | 38.2862833 | -119.4783667 | 2716 | na | na | 312 | 2016 | Millar Unpublished |
| 902 | Sierra Nevada        | Little Walker River Watershed | CA | 38.2835833 | -119.4801000 | 2759 | na | na | 23  | 2016 | Millar Unpublished |
| 916 | Sierra Nevada        | Dunderberg                    | CA | 38.0797167 | -119.2453500 | 3015 | na | na | 50  | 2016 | Millar Unpublished |
| 917 | Sierra Nevada        | Green Cr Cyn                  | CA | 38.0748000 | -119.3051000 | 2914 | na | na | 156 | 2015 | Millar Unpublished |
| 918 | Sierra Nevada        | Green Cr Cyn                  | CA | 38.0749167 | -119.3055833 | 2914 | na | na | 143 | 2015 | Millar Unpublished |
| 919 | Sierra Nevada        | Green Cr Cyn                  | CA | 38.0657333 | -119.2910333 | 2904 | na | na | 233 | 2015 | Millar Unpublished |
| 920 | Shoshone Mountains   | Bald Mtn                      | NV | 39.0063333 | -117.5601333 | 2825 | na | na | 200 | 2015 | Millar Unpublished |
| 921 | Shoshone Mountains   | Bald Mtn                      | NV | 39.0063500 | -117.5598333 | 2831 | na | na | 191 | 2015 | Millar Unpublished |
| 922 | Shoshone Mountains   | Bald Mtn                      | NV | 39.0063500 | -117.5595333 | 2843 | na | na | 176 | 2015 | Millar Unpublished |
| 923 | Shoshone Mountains   | Bald Mtn                      | NV | 39.0067833 | -117.5593333 | 2867 | na | na | 111 | 2015 | Millar Unpublished |
| 924 | Shoshone Mountains   | Bald Mtn                      | NV | 39.0067833 | -117.5594000 | 2869 | na | na | 111 | 2015 | Millar Unpublished |

|     |                      |                       |    |            |              |      |    |    |     |      |                    |
|-----|----------------------|-----------------------|----|------------|--------------|------|----|----|-----|------|--------------------|
| 925 | Shoshone Mountains   | Bald Mtn              | NV | 39.0086333 | -117.5583167 | 2739 | na | na | 29  | 2015 | Millar Unpublished |
| 926 | Toiyabe Range        | Ophir Ridge N         | NV | 38.9513833 | -117.3407333 | 2862 | na | na | 349 | 2015 | Millar Unpublished |
| 927 | Toiyabe Range        | Ophir Ridge N         | NV | 38.9511333 | -117.3425000 | 2868 | na | na | 347 | 2015 | Millar Unpublished |
| 928 | Toiyabe Range        | Ophir Ridge N         | NV | 38.9512000 | -117.3429000 | 2868 | na | na | 340 | 2015 | Millar Unpublished |
| 929 | Toiyabe Range        | Ophir Ridge N         | NV | 38.9500000 | -117.3430167 | 2914 | na | na | 340 | 2015 | Millar Unpublished |
| 930 | Toiyabe Range        | Ophir Ridge           | NV | 38.9415000 | -117.3428333 | 2865 | na | na | 107 | 2015 | Millar Unpublished |
| 931 | Toiyabe Range        | Ophir Ridge           | NV | 38.9412833 | -117.3429333 | 2867 | na | na | 113 | 2015 | Millar Unpublished |
| 932 | Toiyabe Range        | Toiyabe Crest Trail   | NV | 38.9394667 | -117.3196667 | 3154 | na | na | 341 | 2015 | Millar Unpublished |
| 933 | Toiyabe Range        | Ophir Wash            | NV | 38.9460833 | -117.3524167 | 2658 | na | na | 188 | 2015 | Millar Unpublished |
| 934 | Shoshone Mountains   | Peterson Cr           | NV | 39.1567833 | -117.4849500 | 2879 | na | na | 353 | 2015 | Millar Unpublished |
| 935 | Shoshone Mountains   | Peterson Cr           | NV | 39.1593667 | -117.4801833 | 2750 | na | na | 340 | 2015 | Millar Unpublished |
| 936 | White Mountains      | Queen Cyn             | NV | 37.8859833 | -118.3149667 | 2935 | na | na | 328 | 2015 | Millar Unpublished |
| 937 | White Mountains      | Queen Cyn             | NV | 37.8861167 | -118.3152167 | 2920 | na | na | 329 | 2015 | Millar Unpublished |
| 938 | White Mountains      | Queen Cyn             | NV | 37.8864667 | -118.3142000 | 2933 | na | na | 329 | 2015 | Millar Unpublished |
| 939 | White Mountains      | Queen Cyn             | NV | 37.8862000 | -118.3136500 | 3019 | na | na | 333 | 2015 | Millar Unpublished |
| 940 | White Mountains      | Queen Cyn             | NV | 37.8867500 | -118.3125333 | 2955 | na | na | 282 | 2015 | Millar Unpublished |
| 941 | White Mountains      | Queen Cyn             | NV | 37.8862333 | -118.3136833 | 2955 | na | na | 333 | 2015 | Millar Unpublished |
| 942 | White Mountains      | S Ridge of Trail Cyn  | NV | 37.8728500 | -118.3260500 | 3317 | na | na | 14  | 2015 | Millar Unpublished |
| 943 | White Mountains      | S Ridge of Trail Cyn  | NV | 37.8724833 | -118.3266833 | 3335 | na | na | 100 | 2015 | Millar Unpublished |
| 944 | White Mountains      | S Ridge of Trail Cyn  | NV | 37.8691833 | -118.3370333 | 3296 | na | na | 347 | 2015 | Millar Unpublished |
| 945 | White Mountains      | Queen Cyn             | NV | 37.8831500 | -118.3149833 | 3018 | na | na | 192 | 2015 | Millar Unpublished |
| 946 | White Mountains      | Queen Cyn             | NV | 37.8831500 | -118.3149000 | 3019 | na | na | 192 | 2015 | Millar Unpublished |
| 947 | Sierra Nevada        | Tioga Peak            | CA | 37.9521167 | -119.2502833 | 3308 | na | na | 341 | 2016 | Millar Unpublished |
| 948 | Sierra Nevada        | Hanging Valley Ridge  | CA | 38.2488833 | -119.4483167 | 3085 | na | na | 34  | 2015 | Millar Unpublished |
| 949 | Sierra Nevada        | Ellery Lk             | CA | 37.9399833 | -119.2430667 | 2911 | na | na | 158 | 2016 | Millar Unpublished |
| 950 | Sierra Nevada        | Ellery Lk             | CA | 37.9398000 | -119.2433167 | 2922 | na | na | 158 | 2016 | Millar Unpublished |
| 951 | Sierra Nevada        | Gardisky Lake         | CA | 37.9541667 | -119.2593700 | 3133 | na | na | 200 | 2016 | Millar Unpublished |
| 952 | Sierra Nevada        | Nunatak Nature Trail  | CA | 37.9324833 | -119.2514167 | 2921 | na | na | 96  | 2016 | Millar Unpublished |
| 953 | Sierra Nevada        | Nunatak Nature Trail  | CA | 37.9321667 | -119.2514667 | 2925 | na | na | 3   | 2016 | Millar Unpublished |
| 954 | Sierra Nevada        | Nunatak Nature Trail  | CA | 37.9319833 | -119.2517833 | 2924 | na | na | 135 | 2016 | Millar Unpublished |
| 955 | Sweetwater Mountains | Mt Patterson approach | CA | 38.4349333 | -119.3401833 | 3181 | na | na | 318 | 2015 | Millar Unpublished |
| 956 | Sweetwater Mountains | Mt Patterson approach | CA | 38.4347667 | -119.3402000 | 3180 | na | na | 318 | 2015 | Millar Unpublished |
| 957 | Sweetwater Mountains | Mt Patterson approach | CA | 38.4356167 | -119.3352667 | 3263 | na | na | 336 | 2015 | Millar Unpublished |
| 958 | Sweetwater Mountains | Mt Patterson approach | CA | 38.4365333 | -119.3358500 | 3224 | na | na | 333 | 2015 | Millar Unpublished |
| 959 | Sweetwater Mountains | Mt Patterson approach | CA | 38.4371333 | -119.3345500 | 3243 | na | na | 16  | 2015 | Millar Unpublished |
| 960 | Sweetwater Mountains | Mt Patterson approach | CA | 38.4471000 | -119.3275667 | 3053 | na | na | 238 | 2015 | Millar Unpublished |
| 961 | Sweetwater Mountains | Mt Patterson approach | CA | 38.4478000 | -119.3276333 | 3069 | na | na | 244 | 2015 | Millar Unpublished |
| 962 | Bodie Mountains      | Masonic Mtn West      | CA | 38.3467833 | -119.1443167 | 2678 | na | na | 324 | 2017 | Millar Unpublished |
| 963 | Bodie Mountains      | Masonic Mtn West      | CA | 38.3466500 | -119.1443500 | 2686 | na | na | 319 | 2017 | Millar Unpublished |
| 964 | Bodie Mountains      | Masonic Mtn West      | CA | 38.3463500 | -119.1433667 | 2723 | na | na | 334 | 2017 | Millar Unpublished |
| 969 | Sierra Nevada        | Eagle Peak            | CA | 38.1769667 | -119.3960000 | 3177 | na | na | 84  | 2015 | Millar Unpublished |
| 970 | Sierra Nevada        | Eagle Peak            | CA | 38.1771500 | -119.3963000 | 3195 | na | na | 91  | 2015 | Millar Unpublished |
| 971 | White Mountains      | Small summit above CC | CA | 37.5000667 | -118.1776167 | 3234 | na | na | 135 | 2015 | Millar Unpublished |
| 972 | White Mountains      | Small summit above CC | CA | 37.5005833 | -118.1776500 | 3249 | na | na | 120 | 2015 | Millar Unpublished |
| 973 | White Mountains      | White Mtn Peak        | CA | 37.6269000 | -118.2387667 | 4009 | na | na | 24  | 2015 | Millar Unpublished |
| 974 | White Mountains      | White Mtn Peak        | CA | 37.6246833 | -118.2396333 | 3985 | na | na | 270 | 2015 | Millar Unpublished |
| 975 | White Mountains      | White Mtn Peak        | CA | 37.6252333 | -118.2397333 | 3973 | na | na | 245 | 2015 | Millar Unpublished |
| 976 | White Mountains      | White Mtn Peak        | CA | 37.6254667 | -118.2401500 | 3972 | na | na | 250 | 2015 | Millar Unpublished |
| 977 | White Mountains      | White Mtn Peak        | CA | 37.6231167 | -118.2455333 | 3924 | na | na | 144 | 2015 | Millar Unpublished |

|      |                  |                            |    |            |              |      |    |    |     |      |                    |
|------|------------------|----------------------------|----|------------|--------------|------|----|----|-----|------|--------------------|
| 978  | White Mountains  | Near Schulman Grove        | CA | 37.4049833 | -118.1794833 | 3163 | na | na | 55  | 2015 | Millar Unpublished |
| 979  | Sierra Nevada    | Hall Research Natural Area | CA | 37.9633000 | -119.2858667 | 3090 | na | na | 178 | 2016 | Millar Unpublished |
| 980  | Sierra Nevada    | Hall Research Natural Area | CA | 37.9631667 | -119.2850500 | 3078 | na | na | 170 | 2016 | Millar Unpublished |
| 981  | Sierra Nevada    | Glacier Cyn vicinity       | CA | 37.9223667 | -119.2374333 | 3290 | na | na | 234 | 2016 | Millar Unpublished |
| 982  | Sierra Nevada    | Glacier Cyn vicinity       | CA | 37.9224667 | -119.2375667 | 3272 | na | na | 219 | 2016 | Millar Unpublished |
| 983  | Toquima Range    | Main Fk Pine Cr            | NV | 38.7735000 | -116.9044333 | 2881 | na | na | 290 | 2016 | Millar Unpublished |
| 984  | Toquima Range    | Main Fk Pine Cr            | NV | 38.7734333 | -116.9043667 | 2883 | na | na | 290 | 2016 | Millar Unpublished |
| 985  | Toquima Range    | Main Fk Pine Cr            | NV | 38.7854167 | -116.9036667 | 2896 | na | na | 141 | 2016 | Millar Unpublished |
| 986  | Toquima Range    | Bucks Cyn                  | NV | 38.8014170 | -116.9058000 | 3028 | na | na | 86  | 2015 | Millar Unpublished |
| 987  | Toquima Range    | Bucks Cyn                  | NV | 38.8013667 | -116.9063667 | 3098 | na | na | 77  | 2015 | Millar Unpublished |
| 988  | Toquima Range    | Bucks Cyn                  | NV | 38.8013000 | -116.9067833 | 3101 | na | na | 79  | 2015 | Millar Unpublished |
| 989  | Toquima Range    | Bucks Cyn                  | NV | 38.8019167 | -116.9081174 | 3125 | na | na | 28  | 2015 | Millar Unpublished |
| 990  | Toquima Range    | Tarn Fk Pine Cr            | NV | 38.7705167 | -116.9222833 | 3162 | na | na | 11  | 2016 | Millar Unpublished |
| 991  | Toquima Range    | Tarn Fk Pine Cr            | NV | 38.7705833 | -116.9258667 | 3206 | na | na | 61  | 2016 | Millar Unpublished |
| 992  | Toquima Range    | Tarn Fk Pine Cr            | NV | 38.7711833 | -116.9278000 | 3221 | na | na | 108 | 2016 | Millar Unpublished |
| 993  | Toquima Range    | Tarn Fk Pine Cr            | NV | 38.7701333 | -116.9289833 | 3249 | na | na | 57  | 2016 | Millar Unpublished |
| 994  | Toquima Range    | South Summit Mt Jefferson  | NV | 38.7600500 | -116.9339333 | 3492 | na | na | 345 | 2016 | Millar Unpublished |
| 995  | Toquima Range    | South Summit Mt Jefferson  | NV | 38.7602333 | -116.9327500 | 3489 | na | na | 21  | 2016 | Millar Unpublished |
| 996  | Toquima Range    | South-south Fk Pine Cr     | NV | 38.7584167 | -116.9236833 | 3289 | na | na | 40  | 2016 | Millar Unpublished |
| 997  | Sierra Nevada    | Twenty Lks Basin           | CA | 37.9837000 | -119.2890333 | 3116 | na | na | 220 | 2016 | Millar Unpublished |
| 998  | Sierra Nevada    | Twenty Lks Basin           | CA | 37.9837500 | -119.2891667 | 3120 | na | na | 214 | 2016 | Millar Unpublished |
| 999  | Sierra Nevada    | Twenty Lks Basin           | CA | 37.9839167 | -119.2891333 | 3108 | na | na | 245 | 2016 | Millar Unpublished |
| 1000 | Warner Mountains | Crane Mountain             | OR | 42.0734167 | -120.2439500 | 2528 | na | na | 208 | 2015 | Millar Unpublished |
| 1001 | Warner Mountains | Crane Mountain             | OR | 42.0733000 | -120.2443167 | 2512 | na | na | 228 | 2015 | Millar Unpublished |
| 1002 | Warner Mountains | Crane Mountain             | OR | 42.0730500 | -120.2446667 | 2490 | na | na | 239 | 2015 | Millar Unpublished |
| 1003 | Warner Mountains | Crane Mountain             | OR | 42.0730167 | -120.2446333 | 2490 | na | na | 239 | 2015 | Millar Unpublished |
| 1004 | Warner Mountains | Crane Mountain             | OR | 42.0733167 | -120.2449000 | 2483 | na | na | 238 | 2015 | Millar Unpublished |
| 1005 | Warner Mountains | Crane Mountain             | OR | 42.0735000 | -120.2449500 | 2475 | na | na | 238 | 2015 | Millar Unpublished |
| 1006 | Warner Mountains | Crane Mountain             | OR | 42.0736833 | -120.2445500 | 2507 | na | na | 243 | 2015 | Millar Unpublished |
| 1007 | Warner Mountains | Crane Mountain             | OR | 42.0550333 | -120.2325833 | 2378 | na | na | 63  | 2015 | Millar Unpublished |
| 1008 | Warner Mountains | Crane Mountain             | OR | 42.0738833 | -120.2423333 | 2500 | na | na | 49  | 2015 | Millar Unpublished |
| 1022 | Monitor Range    | Clear Cr Cyn               | NV | 38.8130833 | -116.5869167 | 3189 | na | na | 24  | 2015 | Millar Unpublished |
| 1023 | Monitor Range    | Clear Cr Cyn               | NV | 38.8143833 | -116.5886833 | 3192 | na | na | 43  | 2015 | Millar Unpublished |
| 1024 | Monitor Range    | Clear Cr Cyn               | NV | 38.8139833 | -116.5892000 | 3185 | na | na | 35  | 2015 | Millar Unpublished |
| 1025 | Monitor Range    | Clear Cr Cyn               | NV | 38.8142000 | -116.5891667 | 3173 | na | na | 40  | 2015 | Millar Unpublished |
| 1026 | Monitor Range    | Clear Cr Cyn               | NV | 38.8144167 | -116.5892000 | 3165 | na | na | 40  | 2015 | Millar Unpublished |
| 1027 | Monitor Range    | Clear Cr Cyn               | NV | 38.8142000 | -116.5896833 | 3205 | na | na | 34  | 2015 | Millar Unpublished |
| 1028 | Monitor Range    | Clear Cr Cyn               | NV | 38.8140667 | -116.5879833 | 3160 | na | na | 9   | 2015 | Millar Unpublished |
| 1029 | Monitor Range    | Clear Cr Cyn               | NV | 38.8185333 | -116.5670333 | 2698 | na | na | 349 | 2015 | Millar Unpublished |
| 1030 | Monitor Range    | Clear Cr Cyn               | NV | 38.8181167 | -116.5669833 | 2664 | na | na | 347 | 2015 | Millar Unpublished |
| 1036 | Warner Mountains | Likely-Eagleville Rd       | CA | 41.1770167 | 120.2906333  | 1766 | na | na | 200 | 2015 | Millar Unpublished |
| 1037 | Warner Mountains | Likely-Eagleville Rd       | CA | 41.1905333 | -120.2243500 | 2077 | na | na | 142 | 2015 | Millar Unpublished |
| 1038 | Warner Mountains | Likely-Eagleville Rd       | CA | 41.1913000 | -120.2216833 | 2052 | na | na | 176 | 2015 | Millar Unpublished |
| 1042 | Sierra Nevada    | Lundy Cyn                  | CA | 38.0282333 | -119.2487000 | 2486 | na | na | 171 | 2016 | Millar Unpublished |
| 1043 | Sierra Nevada    | Lundy Cyn                  | CA | 38.0278167 | -119.2492000 | 2467 | na | na | 157 | 2016 | Millar Unpublished |
| 1044 | Mono Craters     | Northwest Mono Crater      | CA | 37.9233800 | -119.0290400 | 2059 | na | na | 326 | 2015 | Millar Unpublished |
| 1045 | Mono Craters     | Northwest Mono Crater      | CA | 37.9234400 | -119.0290000 | 2055 | na | na | 326 | 2016 | Millar Unpublished |
| 1046 | Sierra Nevada    | Virgina Lks Cyn            | CA | 38.0529500 | -119.2275700 | 2930 | na | na | 45  | 2016 | Millar Unpublished |
| 1047 | Sierra Nevada    | Kavenanugh Crest           | CA | 38.0800833 | -119.2713667 | 3274 | na | na | 45  | 2016 | Millar Unpublished |



|      |                    |                               |    |            |              |      |    |    |     |      |                    |
|------|--------------------|-------------------------------|----|------------|--------------|------|----|----|-----|------|--------------------|
| 1048 | Sierra Nevada      | Kavenanugh Crest              | CA | 38.0801333 | -119.2710833 | 3267 | na | na | 45  | 2016 | Millar Unpublished |
| 1049 | Sierra Nevada      | Silverpine Lk                 | CA | 38.0748667 | -119.2618500 | 3149 | na | na | 331 | 2016 | Millar Unpublished |
| 1050 | Sierra Nevada      | Silverpine Lk                 | CA | 38.0748833 | -119.2617500 | 3154 | na | na | 331 | 2016 | Millar Unpublished |
| 1051 | Sierra Nevada      | Saddlebag Lk                  | CA | 37.9718833 | -119.2671667 | 3092 | na | na | 225 | 2016 | Millar Unpublished |
| 1052 | Sierra Nevada      | Saddlebag Lk                  | CA | 37.9834833 | -119.2812000 | 3116 | na | na | 202 | 2016 | Millar Unpublished |
| 1053 | Sierra Nevada      | Saddlebag Lk                  | CA | 37.9839667 | -119.2821167 | 3142 | na | na | 203 | 2016 | Millar Unpublished |
| 1054 | Sierra Nevada      | Greenstone Lk                 | CA | 37.9775667 | -119.2916833 | 3091 | na | na | 346 | 2016 | Millar Unpublished |
| 1055 | Sierra Nevada      | Saddlebag Lk                  | CA | 37.9693000 | -119.2744833 | 3089 | na | na | 80  | 2016 | Millar Unpublished |
| 1056 | Sierra Nevada      | Benjamin Buttes               | CA | 38.0827833 | -119.2325333 | 2798 | na | na | 32  | 2016 | Millar Unpublished |
| 1058 | Sierra Nevada      | Bennetville Mine              | CA | 37.9365667 | -119.2617667 | 2996 | na | na | 49  | 2016 | Millar Unpublished |
| 1059 | Pine Nut Mountains | Mt. Siegel                    | CA | 38.8648400 | -119.5063200 | 2638 | na | na | 220 | 2016 | Millar Unpublished |
| 1060 | Pine Nut Mountains | Mt. Siegel                    | CA | 38.8650000 | -119.5063600 | 2638 | na | na | 225 | 2016 | Millar Unpublished |
| 1061 | Pine Nut Mountains | Mt. Siegel                    | CA | 38.8654300 | -119.5066100 | 2640 | na | na | 236 | 2016 | Millar Unpublished |
| 1062 | Pine Nut Mountains | Mt. Siegel                    | CA | 38.8657200 | -119.5069400 | 2630 | na | na | 247 | 2016 | Millar Unpublished |
| 1063 | Pine Nut Mountains | Mt. Siegel                    | CA | 38.8660500 | -119.5070300 | 2637 | na | na | 252 | 2016 | Millar Unpublished |
| 1064 | Pine Nut Mountains | Mt. Siegel                    | CA | 38.8660400 | -119.5061200 | 2673 | na | na | 248 | 2016 | Millar Unpublished |
| 1065 | Sierra Nevada      | Lake Cyn                      | CA | 37.9974100 | -119.2514900 | 2970 | na | na | 116 | 2016 | Millar Unpublished |
| 1066 | Sierra Nevada      | Lake Cyn                      | CA | 38.0014100 | -119.2494000 | 2929 | na | na | 81  | 2016 | Millar Unpublished |
| 1067 | Mono Craters       | Middle Craters                | CA | 37.8852100 | -119.0159600 | 2303 | na | na | 252 | 2016 | Millar Unpublished |
| 1068 | Mono Craters       | Middle Craters                | CA | 37.8856400 | -119.0162300 | 2312 | na | na | 184 | 2016 | Millar Unpublished |
| 1069 | Mono Craters       | Middle Craters                | CA | 37.8864400 | -119.0114900 | 2433 | na | na | 5   | 2016 | Millar Unpublished |
| 1070 | Mono Craters       | Northeast Mono Craters        | CA | 37.9016600 | -118.9907900 | 2158 | na | na | 0   | 2016 | Millar Unpublished |
| 1071 | Mono Craters       | Northeast Mono Craters        | CA | 37.9021200 | -118.9921300 | 2158 | na | na | 17  | 2016 | Millar Unpublished |
| 1072 | Mono Craters       | Northeast Mono Craters        | CA | 37.9021800 | -118.9935100 | 2150 | na | na | 17  | 2016 | Millar Unpublished |
| 1073 | Mono Craters       | Northeast Mono Craters        | CA | 37.9022900 | -118.9939000 | 2148 | na | na | 17  | 2016 | Millar Unpublished |
| 1074 | Mono Craters       | Northeast Mono Craters        | CA | 37.9022800 | -118.9939700 | 2152 | na | na | 10  | 2016 | Millar Unpublished |
| 1075 | Mono Craters       | Northeast Mono Craters        | CA | 37.9023300 | -118.9941800 | 2165 | na | na | 6   | 2016 | Millar Unpublished |
| 1076 | Mono Craters       | Northeast Mono Craters        | CA | 37.9023200 | -118.9945800 | 2164 | na | na | 8   | 2016 | Millar Unpublished |
| 1081 | Toiyabe Range      | Stewarts Creek Access         | NV | 38.8769500 | -117.3532000 | 3192 | na | na | 29  | 2016 | Millar Unpublished |
| 1082 | Toiyabe Range      | Stewarts Creek Access         | NV | 38.8773000 | -117.3538100 | 3180 | na | na | 122 | 2016 | Millar Unpublished |
| 1083 | Toiyabe Range      | Stewarts Creek Access         | NV | 38.8765400 | -117.3540900 | 3205 | na | na | 78  | 2016 | Millar Unpublished |
| 1084 | Toiyabe Range      | Stewarts Creek Access         | NV | 38.8771500 | -117.3531600 | 3175 | na | na | 29  | 2016 | Millar Unpublished |
| 1085 | Toiyabe Range      | Stewarts Creek Access         | NV | 38.8762800 | -117.3537600 | 3197 | na | na | 78  | 2016 | Millar Unpublished |
| 1086 | Toiyabe Range      | Arc Dome Plateau              | NV | 38.8565200 | -117.3655200 | 3304 | na | na | 121 | 2016 | Millar Unpublished |
| 1087 | Toiyabe Range      | Arc Dome Trail                | NV | 38.8483300 | -117.3480300 | 3318 | na | na | 210 | 2016 | Millar Unpublished |
| 1088 | Toiyabe Range      | Toiyabe Crest Trail           | NV | 38.9333200 | -117.3242600 | 3166 | na | na | 341 | 2016 | Millar Unpublished |
| 1089 | Toiyabe Range      | Toiyabe Crest Trail           | NV | 38.9392300 | -117.3248400 | 3194 | na | na | 283 | 2016 | Millar Unpublished |
| 1090 | Toiyabe Range      | Ophir Pass Road               | NV | 38.9503400 | -117.3410600 | 2880 | na | na | 350 | 2016 | Millar Unpublished |
| 1091 | Toiyabe Range      | Ophir Pass Road               | NV | 38.9513800 | -117.3407000 | 2863 | na | na | 349 | 2016 | Millar Unpublished |
| 1092 | Toiyabe Range      | Ophir Pass Road               | NV | 38.9501800 | -117.3434400 | 2898 | na | na | 347 | 2016 | Millar Unpublished |
| 1093 | Toiyabe Range      | Ophir Pass Road               | NV | 38.9500000 | -117.3430300 | 2897 | na | na | 345 | 2016 | Millar Unpublished |
| 1094 | Toiyabe Range      | Ophir Pass Road               | NV | 38.9505600 | -117.3432100 | 2874 | na | na | 345 | 2016 | Millar Unpublished |
| 1095 | Sierra Nevada      | Little Walker River Watershed | CA | 38.2842000 | -119.4854500 | 2796 | na | na | 59  | 2016 | Millar Unpublished |
| 1096 | Sierra Nevada      | Little Walker River Watershed | CA | 38.2857100 | -119.4783900 | 2723 | na | na | 309 | 2016 | Millar Unpublished |
| 1097 | Sierra Nevada      | Little Walker River Watershed | CA | 38.2799600 | -119.4831000 | 2836 | na | na | 352 | 2016 | Millar Unpublished |
| 1098 | Pine Nut Mountains | Mt. Siegel                    | NV | 38.8756800 | -119.5043300 | 2756 | na | na | 258 | 2016 | Millar Unpublished |
| 1099 | Pine Nut Mountains | Mt. Siegel                    | NV | 38.8757500 | -119.5045500 | 2779 | na | na | 252 | 2016 | Millar Unpublished |
| 1100 | Pine Nut Mountains | Mt. Siegel                    | NV | 38.8757400 | -119.5047000 | 2776 | na | na | 252 | 2016 | Millar Unpublished |
| 1101 | Pine Nut Mountains | Mt. Siegel                    | NV | 38.8756900 | -119.5050000 | 2752 | na | na | 243 | 2016 | Millar Unpublished |

|      |                     |                   |    |            |              |      |    |    |     |      |                    |
|------|---------------------|-------------------|----|------------|--------------|------|----|----|-----|------|--------------------|
| 1102 | Pine Nut Mountains  | Mt. Siegel        | NV | 38.8756800 | -119.5047800 | 2770 | na | na | 245 | 2016 | Millar Unpublished |
| 1103 | Pine Nut Mountains  | Mt. Siegel        | NV | 38.8759600 | -119.5046900 | 2774 | na | na | 249 | 2016 | Millar Unpublished |
| 1104 | Pine Nut Mountains  | Mt. Siegel        | NV | 38.8760500 | -119.5053000 | 2748 | na | na | 249 | 2016 | Millar Unpublished |
| 1105 | Pine Nut Mountains  | Mt. Siegel        | NV | 38.8761600 | -119.5054500 | 2738 | na | na | 253 | 2016 | Millar Unpublished |
| 1106 | Pine Nut Mountains  | Mt. Siegel        | NV | 38.8762200 | -119.5056200 | 2736 | na | na | 253 | 2016 | Millar Unpublished |
| 1107 | Pine Nut Mountains  | Mt. Siegel        | NV | 38.8787500 | -119.5040100 | 2829 | na | na | 315 | 2016 | Millar Unpublished |
| 1108 | Pine Nut Mountains  | Mt. Siegel        | NV | 38.8812800 | -119.5033600 | 2834 | na | na | 335 | 2016 | Millar Unpublished |
| 1109 | Pine Nut Mountains  | Mt. Siegel        | NV | 38.8883200 | -119.5024900 | 2863 | na | na | 166 | 2016 | Millar Unpublished |
| 1110 | Pine Nut Mountains  | Mt. Siegel        | NV | 38.8886400 | -119.5022000 | 2873 | na | na | 120 | 2016 | Millar Unpublished |
| 1111 | Pine Nut Mountains  | Mt. Siegel        | NV | 38.8908600 | -119.5021100 | 2861 | na | na | 16  | 2016 | Millar Unpublished |
| 1112 | Pine Nut Mountains  | Mt Oreana         | NV | 38.8849200 | -119.4898500 | 2567 | na | na | 261 | 2016 | Millar Unpublished |
| 1113 | Pine Nut Mountains  | Mt. Oreana        | NV | 38.8846200 | -119.4896700 | 2578 | na | na | 225 | 2016 | Millar Unpublished |
| 1114 | Sierra Nevada       | June Lk Loop      | CA | 37.7440300 | -119.0964500 | 2767 | na | na | 58  | 2016 | Millar Unpublished |
| 1115 | Sierra Nevada       | Green Cr Drainage | CA | 38.0526400 | -119.3229800 | 3107 | na | na | 189 | 2016 | Millar Unpublished |
| 1116 | Sierra Nevada       | Green Cr Drainage | CA | 38.0535300 | -119.3234700 | 3131 | na | na | 54  | 2016 | Millar Unpublished |
| 1117 | Sierra Nevada       | Green Cr Drainage | CA | 38.0533600 | -119.3270800 | 3107 | na | na | 188 | 2016 | Millar Unpublished |
| 1121 | Sierra Nevada       | Green Cr Cyn      | CA | 38.0496700 | -119.3218200 | 3128 | na | na | 332 | 2016 | Millar Unpublished |
| 1122 | Sierra Nevada       | Green Cr Drainage | CA | 38.0532000 | -119.3248800 | 3121 | na | na | 182 | 2016 | Millar Unpublished |
| 1126 | Sierra Nevada       | Green Cr Cyn      | CA | 38.0555020 | -119.3021190 | 3003 | na | na | 133 | 2016 | Millar Unpublished |
| 1127 | Sierra Nevada       | Green Cr Cyn      | CA | 38.0559880 | -119.2993430 | 2995 | na | na | 10  | 2016 | Millar Unpublished |
| 1128 | Sierra Nevada       | Green Cr Cyn      | CA | 38.0610790 | -119.2907640 | 2934 | na | na | 340 | 2016 | Millar Unpublished |
| 1129 | East Humboldt Range | Smith Lk          | NV | 41.0347300 | -115.0947000 | 2794 | na | na | 143 | 2016 | Millar Unpublished |
| 1130 | East Humboldt Range | Trout Cr Cyn      | NV | 41.0392800 | -115.0970500 | 2738 | na | na | 350 | 2016 | Millar Unpublished |
| 1131 | Ruby Mountains      | Thomas Cyn        | NV | 40.6237600 | -115.4073400 | 2698 | na | na | 34  | 2016 | Millar Unpublished |
| 1132 | Ruby Mountains      | Thomas Cyn        | NV | 40.6208700 | -115.4048000 | 2721 | na | na | 276 | 2016 | Millar Unpublished |
| 1133 | Ruby Mountains      | Thomas Cyn        | NV | 40.6189100 | -115.4059400 | 2750 | na | na | 3   | 2016 | Millar Unpublished |
| 1134 | Ruby Mountains      | Thomas Cyn        | NV | 40.6081700 | -115.3986900 | 3143 | na | na | 35  | 2016 | Millar Unpublished |
| 1135 | Ruby Mountains      | Overland Lk       | NV | 40.4599500 | -115.4476400 | 2677 | na | na | 335 | 2016 | Millar Unpublished |
| 1136 | Ruby Mountains      | Overland Lk       | NV | 40.4597500 | -115.4477900 | 2691 | na | na | 341 | 2016 | Millar Unpublished |
| 1137 | Ruby Mountains      | Overland Lk       | NV | 40.4596300 | -115.4477600 | 2695 | na | na | 336 | 2016 | Millar Unpublished |
| 1138 | Ruby Mountains      | Overland Lk       | NV | 40.4596500 | -115.4478500 | 2692 | na | na | 340 | 2016 | Millar Unpublished |
| 1139 | Ruby Mountains      | Overland Lk       | NV | 40.4596000 | -115.4477600 | 2698 | na | na | 336 | 2016 | Millar Unpublished |
| 1140 | Ruby Mountains      | Overland Lk       | NV | 40.4597300 | -115.4477000 | 2691 | na | na | 335 | 2016 | Millar Unpublished |
| 1141 | Ruby Mountains      | Overland Lk       | NV | 40.4598500 | -115.4475900 | 2702 | na | na | 335 | 2016 | Millar Unpublished |
| 1143 | White Mountains     | Middle Creek Cyn  | CA | 37.8212000 | -118.3298100 | 3157 | na | na | 307 | 2016 | Millar Unpublished |
| 1144 | New Range           | Rickey Peak Ridge | CA | 38.2573500 | -119.3422000 | 2505 | na | na | 141 | 2016 | Millar Unpublished |
| 1145 | New Range           | Rickey Peak Ridge | CA | 38.2577070 | -119.3414980 | 2499 | na | na | 122 | 2016 | Millar Unpublished |
| 1146 | New Range           | Rickey Peak Ridge | CA | 38.2577100 | -119.3418000 | 2511 | na | na | 123 | 2016 | Millar Unpublished |
| 1147 | Sierra Nevada       | Jordan Basin      | CA | 38.0633300 | -119.1972600 | 2532 | na | na | 192 | 2017 | Millar Unpublished |
| 1148 | Sierra Nevada       | Jordan Basin      | CA | 38.0638500 | -119.1958200 | 2513 | na | na | 176 | 2017 | Millar Unpublished |
| 1149 | Sierra Nevada       | Jordan Basin      | CA | 38.0631930 | -119.1978700 | 2555 | na | na | 195 | 2017 | Millar Unpublished |
| 1150 | Bodie Mountains     | Masonic Mtn West  | CA | 38.3449700 | -119.1451000 | 2719 | na | na | 322 | 2017 | Millar Unpublished |
| 1151 | Bodie Mountains     | Masonic Mtn West  | CA | 38.3445300 | -119.1452200 | 2712 | na | na | 319 | 2017 | Millar Unpublished |
| 1152 | Bodie Mountains     | Masonic Mtn West  | CA | 38.3442200 | -119.1457100 | 2699 | na | na | 302 | 2017 | Millar Unpublished |
| 1153 | Bodie Mountains     | Masonic Mtn West  | CA | 38.3433600 | -119.1476400 | 2647 | na | na | 294 | 2017 | Millar Unpublished |
| 1154 | Bodie Mountains     | Masonic Mtn West  | CA | 38.3464200 | -119.1434700 | 2702 | na | na | 352 | 2017 | Millar Unpublished |
| 1155 | Pine Grove Hills    | Bald Mountain     | NV | 38.5306200 | -119.1161100 | 2815 | na | na | 175 | 2017 | Millar Unpublished |
| 1156 | Pine Grove Hills    | Bald Mountain     | NV | 38.5317300 | -119.1162900 | 2830 | na | na | 185 | 2017 | Millar Unpublished |
| 1157 | Pine Grove Hills    | Bald Mountain     | NV | 38.5340000 | -119.1154300 | 2913 | na | na | 201 | 2017 | Millar Unpublished |

|           |                      |                 |    |            |              |      |    |    |     |      |                                                       |
|-----------|----------------------|-----------------|----|------------|--------------|------|----|----|-----|------|-------------------------------------------------------|
| 1158      | Pine Grove Hills     | Bald Mountain   | NV | 38.5300450 | -119.1255280 | 2855 | na | na | 171 | 2017 | Millar Unpublished                                    |
| CNDDb-001 | Sierra Nevada        | Onion Valley    | CA | 36.7742300 | -118.3240700 | 2581 | na | na | 149 | 2005 | California Natural Diversity Database 11/2016         |
| CNDDb-002 | Sierra Nevada        | Ellery Lake     | CA | 37.9410300 | -119.2432300 | 2944 | na | na | 180 | 2009 | California Natural Diversity Database 11/2016         |
| CNDDb-004 | Bodie Mountains      | Bodie Bluff     | CA | 38.2159800 | -119.0003500 | 2545 | na | na | 197 | 2015 | California Natural Diversity Database 11/2016         |
| CNDDb-005 | Sierra Nevada        | Dorothy Lake    | CA | 38.1751600 | -119.5923500 | 2878 | na | na | -1  | 2005 | California Natural Diversity Database 11/2016         |
| CNDDb-007 | Sierra Nevada        | Virginia Cyn    | CA | 38.0614400 | -119.3389900 | 3005 | na | na | 63  | 2005 | California Natural Diversity Database 11/2016         |
| CNDDb-017 | Sweetwater Mountains | Lobdell Lk      | CA | 38.4479500 | -119.3335300 | 3124 | na | na | 341 | 2007 | California Natural Diversity Database 11/2016         |
| CNDDb-020 | Sweetwater Mountains | Mt Patterson    | CA | 38.4369900 | -119.3345700 | 3240 | na | na | 16  | 2007 | California Natural Diversity Database 11/2016         |
| CNDDb-035 | White Mountains      | Campito Mt      | CA | 37.4853400 | -118.1881000 | 3192 | na | na | 28  | 2008 | California Natural Diversity Database 11/2016         |
| CNDDb-038 | White Mountains      | Piute Mt        | CA | 37.5575000 | -118.2068600 | 3466 | na | na | 144 | 2009 | California Natural Diversity Database 11/2016         |
| CNDDb-039 | White Mountains      | Mt Barcroft     | CA | 37.5689800 | -118.2261800 | 3466 | na | na | 127 | 2007 | California Natural Diversity Database 11/2016         |
| CNDDb-040 | White Mountains      | Mt Barcroft     | CA | 37.5667200 | -118.2077400 | 3543 | na | na | 125 | 2008 | California Natural Diversity Database 11/2016         |
| CNDDb-043 | White Mountains      | Mt Barcroft     | CA | 37.5880300 | -118.2404200 | 3371 | na | na | 261 | 2008 | California Natural Diversity Database 11/2016         |
| CNDDb-044 | White Mountains      | Mt Barcroft     | CA | 37.5820800 | -118.2482500 | 3854 | na | na | 144 | 2009 | California Natural Diversity Database 11/2016         |
| CNDDb-045 | Sierra Nevada        | Ruby Lake       | CA | 37.4166300 | -118.7677300 | 3953 | na | na | 83  | 2007 | California Natural Diversity Database 11/2016         |
| CNDDb-047 | Sierra Nevada        | Mt Mills        | CA | 37.3995500 | -118.7719000 | 3536 | na | na | 124 | 2007 | California Natural Diversity Database 11/2016         |
| CNDDb-048 | Sierra Nevada        | Mt Mills        | CA | 37.3991200 | -118.7612300 | 3536 | na | na | 79  | 2007 | California Natural Diversity Database 11/2016         |
| CNDDb-049 | Sierra Nevada        | Heart Lake      | CA | 37.4186700 | -118.7560200 | 3249 | na | na | 79  | 2007 | California Natural Diversity Database 11/2016         |
| CNDDb-051 | Sierra Nevada        | Ruby Lake       | CA | 37.4130800 | -118.7735400 | 3185 | na | na | 119 | 2009 | California Natural Diversity Database 11/2016         |
| CNDDb-055 | Sierra Nevada        | Rock Crk Cyn    | CA | 37.5212600 | -118.7119200 | 3405 | na | na | 60  | 2008 | California Natural Diversity Database 11/2016         |
| CNDDb-057 | Sierra Nevada        | Chickenfoot Lk  | CA | 37.4033600 | -118.7457500 | 2554 | na | na | 55  | 2008 | California Natural Diversity Database 11/2016         |
| CNDDb-058 | Glass Mountains      | Sawmill Mdw     | CA | 37.7464700 | -118.6536700 | 3395 | na | na | 15  | 2007 | California Natural Diversity Database 11/2016         |
| CNDDb-059 | Sierra Nevada        | Laurel Mt       | CA | 37.5839600 | -118.8746100 | 3028 | na | na | 17  | 2009 | California Natural Diversity Database 11/2016         |
| CNDDb-061 | Sierra Nevada        | Mt Morrison     | CA | 37.5689800 | -118.8732900 | 2466 | na | na | 128 | 2009 | California Natural Diversity Database 11/2016         |
| CNDDb-062 | Sierra Nevada        | Valentine Lk    | CA | 37.5747700 | -118.9385900 | 2569 | na | na | 102 | 2008 | California Natural Diversity Database 11/2016         |
| CNDDb-069 | Inyo Craters         | Obsidian Dome   | CA | 37.7485100 | -119.0252000 | 2984 | na | na | 112 | 2009 | California Natural Diversity Database 11/2016         |
| CNDDb-070 | Sierra Nevada        | Reversed Pk     | CA | 37.8056300 | -119.1092000 | 2499 | na | na | 57  | 2009 | California Natural Diversity Database 11/2016         |
| CNDDb-072 | Sierra Nevada        | Agnew Lk        | CA | 37.7568200 | -119.1310100 | 2207 | na | na | 310 | 2008 | California Natural Diversity Database 11/2016         |
| CNDDb-073 | Sierra Nevada        | Spooky Meadow   | CA | 37.7488800 | -119.1329500 | 2603 | na | na | 318 | 2008 | California Natural Diversity Database 11/2016         |
| CNDDb-074 | Sierra Nevada        | Fern Lake       | CA | 37.7456100 | -119.1118800 | 2825 | na | na | 284 | 2008 | California Natural Diversity Database 11/2016         |
| CNDDb-075 | Sierra Nevada        | Clark Lakes     | CA | 37.7399600 | -119.1428800 | 2722 | na | na | 69  | 2009 | California Natural Diversity Database 11/2016         |
| CNDDb-169 | Sierra Nevada        | Pipet Tarn      | CA | 37.9455300 | -119.2854600 | 3005 | na | na | 10  | 2015 | California Natural Diversity Database 11/2016         |
| CNDDb-170 | Sierra Nevada        | Slate Cr        | CA | 37.9637900 | -119.2856400 | 3170 | na | na | 225 | 2015 | California Natural Diversity Database 11/2016         |
| CNDDb-171 | Sierra Nevada        | Donner Pass     | CA | 39.3125500 | -120.3242800 | 3109 | na | na | 174 | 2010 | California Natural Diversity Database 11/2016         |
| CNDDb-174 | Warner Mountains     | Warren Pk       | CA | 41.3823800 | -120.2168900 | 2248 | na | na | 335 | 2005 | California Natural Diversity Database 11/2016         |
| CNDDb-175 | Sierra Nevada        | Ebbetts Pk      | CA | 38.5458100 | -119.8162000 | 2807 | na | na | 14  | 2005 | California Natural Diversity Database 11/2016         |
| CNDDb-176 | Sierra Nevada        | Sonora Pk       | CA | 38.3499900 | -119.6439000 | 2713 | na | na | 113 | 2010 | California Natural Diversity Database 11/2016         |
| CNDDb-177 | Warner Mountains     | Warren Pk       | CA | 41.3698900 | -120.2387900 | 3208 | na | na | 202 | 2005 | California Natural Diversity Database 11/2016         |
| CNDDb-178 | Sierra Nevada        | Luther Pass     | CA | 38.7776700 | -119.8897700 | 2429 | na | na | 180 | 2007 | California Natural Diversity Database 11/2016         |
| CNDDb-180 | Sierra Nevada        | Elephants Back  | CA | 38.6808600 | -119.9841900 | 1827 | na | na | 6   | 2008 | California Natural Diversity Database 11/2016         |
| CNDDb-181 | Sierra Nevada        | Markleeville Pk | CA | 38.6748400 | -119.9247300 | 2822 | na | na | 350 | 2008 | California Natural Diversity Database 11/2016         |
| CNDDb-182 | Zunnamed Mountains   | Leviathan Pk    | CA | 38.6816200 | -119.6297700 | 2366 | na | na | 321 | 2007 | California Natural Diversity Database 11/2016         |
| CNDDb-183 | Zunnamed Mountains   | Leviathan Pk    | CA | 38.6658800 | -119.6263000 | 2539 | na | na | -1  | 2008 | California Natural Diversity Database 11/2016         |
| CNDDb-184 | Zunnamed Mountains   | Leviathan Pk    | CA | 38.6804300 | -119.6117400 | 2539 | na | na | 251 | 2007 | California Natural Diversity Database 11/2016         |
| ER001     | Wassuk Mountains     | Mt Grant        | NV | 38.5651200 | -118.7935800 | 3357 | na | na | 200 | 2015 | Unpubl. Data; E. Rickart, Natural History Museum Utah |
| ER002     | Wassuk Mountains     | Mt Grant        | NV | 38.5607100 | -118.8009000 | 3127 | na | na | 193 | 2015 | Unpubl. Data; E. Rickart, Natural History Museum Utah |
| ER004     | Ruby Mountains       | Favre Lake      | NV | 40.5720000 | -115.4010000 | 2945 | na | na | 24  | 2007 | Unpubl. Data; E. Rickart, Natural History Museum Utah |
| ER005     | Ruby Mountains       | Castle Lake     | NV | 40.5670000 | -115.4020000 | 3004 | na | na | 45  | 2007 | Unpubl. Data; E. Rickart, Natural History Museum Utah |
| ER006     | Ruby Mountains       | Liberty Pass    | NV | 40.5870000 | -115.3930000 | 3186 | na | na | 330 | 2007 | Unpubl. Data; E. Rickart, Natural History Museum Utah |

|       |                 |                     |    |            |              |      |    |    |     |      |                                                       |
|-------|-----------------|---------------------|----|------------|--------------|------|----|----|-----|------|-------------------------------------------------------|
| ER007 | Ruby Mountains  | Long Canyon         | NV | 40.5080000 | -115.4540000 | 2864 | na | na | 18  | 2008 | Unpubl. Data; E. Rickart, Natural History Museum Utah |
| JC001 | Hart Mountains  | Goat Creek          | OR | 42.4127190 | -119.7595600 | 2144 | na | na | 181 | 2010 | Castillo et al. 2016                                  |
| JC002 | Sheldon Plateau | Andy's Place        | NV | 41.7905940 | -119.3859160 | 1827 | na | na | 17  | 2010 | Castillo et al. 2016                                  |
| JC003 | Sheldon Plateau | Andy's Place        | NV | 41.7902540 | -119.3852160 | 1825 | na | na | 59  | 2010 | Castillo et al. 2016                                  |
| JC004 | Sheldon Plateau | Andy's Place        | NV | 41.7901840 | -119.3850460 | 1823 | na | na | 59  | 2010 | Castillo et al. 2016                                  |
| JC005 | Sheldon Plateau | Andy's Place        | NV | 41.7899840 | -119.3845560 | 1824 | na | na | 51  | 2010 | Castillo et al. 2016                                  |
| JC006 | Sheldon Plateau | Andy's Place        | NV | 41.7899340 | -119.3841460 | 1824 | na | na | 0   | 2010 | Castillo et al. 2016                                  |
| JC007 | Sheldon Plateau | Andy's Place        | NV | 41.7899140 | -119.3836360 | 1827 | na | na | 349 | 2010 | Castillo et al. 2016                                  |
| JC008 | Sheldon Plateau | Andy's Place        | NV | 41.7915140 | -119.3822660 | 1818 | na | na | 198 | 2010 | Castillo et al. 2016                                  |
| JC009 | Sheldon Plateau | Andy's Place        | NV | 41.7914740 | -119.3822160 | 1817 | na | na | 188 | 2010 | Castillo et al. 2016                                  |
| JC010 | Sheldon Plateau | Horse Canyon        | NV | 41.7769040 | -119.3496660 | 1854 | na | na | 189 | 2010 | Castillo et al. 2016                                  |
| JC011 | Sheldon Plateau | Horse Canyon        | NV | 41.7755940 | -119.3493960 | 1853 | na | na | 282 | 2010 | Castillo et al. 2016                                  |
| JC012 | Sheldon Plateau | Horse Canyon        | NV | 41.7755640 | -119.3493560 | 1850 | na | na | 282 | 2010 | Castillo et al. 2016                                  |
| JC013 | Sheldon Plateau | Horse Canyon        | NV | 41.7755640 | -119.3492660 | 1858 | na | na | 282 | 2010 | Castillo et al. 2016                                  |
| JC014 | Sheldon Plateau | Horse Canyon        | NV | 41.7758140 | -119.3489060 | 1856 | na | na | 284 | 2010 | Castillo et al. 2016                                  |
| JC015 | Sheldon Plateau | Horse Canyon        | NV | 41.7760540 | -119.3482960 | 1852 | na | na | 315 | 2010 | Castillo et al. 2016                                  |
| JC019 | Sheldon Plateau | Fish Creek Spring   | NV | 41.7572340 | -119.3937860 | 1945 | na | na | 265 | 2010 | Castillo et al. 2016                                  |
| JC020 | Sheldon Plateau | Fish Creek Spring   | NV | 41.7571040 | -119.3937160 | 1942 | na | na | 218 | 2010 | Castillo et al. 2016                                  |
| JC021 | Sheldon Plateau | Fish Creek Spring   | NV | 41.7565840 | -119.3926060 | 1947 | na | na | 185 | 2010 | Castillo et al. 2016                                  |
| JC022 | Sheldon Plateau | Fish Creek Spring   | NV | 41.7577440 | -119.3888360 | 1942 | na | na | 138 | 2010 | Castillo et al. 2016                                  |
| JC023 | Sheldon Plateau | Fish Creek Spring   | NV | 41.7577140 | -119.3888260 | 1943 | na | na | 138 | 2010 | Castillo et al. 2016                                  |
| JC024 | Sheldon Plateau | Fish Creek Spring   | NV | 41.7579340 | -119.3880960 | 1940 | na | na | 162 | 2010 | Castillo et al. 2016                                  |
| JC025 | Sheldon Plateau | Fish Creek Spring   | NV | 41.7586040 | -119.3857760 | 1939 | na | na | 174 | 2010 | Castillo et al. 2016                                  |
| JC026 | Sheldon Plateau | Fish Creek Spring   | NV | 41.7591040 | -119.3831360 | 1942 | na | na | 141 | 2010 | Castillo et al. 2016                                  |
| JC027 | Sheldon Plateau | Fish Creek Spring   | NV | 41.7592440 | -119.3827260 | 1936 | na | na | 150 | 2010 | Castillo et al. 2016                                  |
| JC028 | Sheldon Plateau | Fish Creek Spring   | NV | 41.7594240 | -119.3825460 | 1940 | na | na | 150 | 2010 | Castillo et al. 2016                                  |
| JC029 | Sheldon Plateau | Echo Canyon         | NV | 41.8444440 | -119.2813960 | 1898 | na | na | 303 | 2010 | Castillo et al. 2016                                  |
| JC030 | Sheldon Plateau | Echo Canyon         | NV | 41.8445040 | -119.2812760 | 1898 | na | na | 312 | 2010 | Castillo et al. 2016                                  |
| JC031 | Sheldon Plateau | Echo Canyon         | NV | 41.8461040 | -119.2802760 | 1889 | na | na | 340 | 2010 | Castillo et al. 2016                                  |
| JC032 | Sheldon Plateau | Echo Canyon         | NV | 41.8461840 | -119.2801560 | 1895 | na | na | 340 | 2010 | Castillo et al. 2016                                  |
| JC033 | Sheldon Plateau | Echo Canyon         | NV | 41.8482740 | -119.2766260 | 1899 | na | na | 327 | 2010 | Castillo et al. 2016                                  |
| JC034 | Sheldon Plateau | Echo Canyon         | NV | 41.8478840 | -119.2765160 | 1898 | na | na | 320 | 2010 | Castillo et al. 2016                                  |
| JC035 | Sheldon Plateau | Echo Canyon         | NV | 41.8480940 | -119.2765160 | 1898 | na | na | 327 | 2010 | Castillo et al. 2016                                  |
| JC036 | Sheldon Plateau | Fish Creek Mountain | NV | 41.7511840 | -119.3476560 | 2000 | na | na | 37  | 2010 | Castillo et al. 2016                                  |
| JC037 | Sheldon Plateau | Fish Creek Mountain | NV | 41.7510040 | -119.3476260 | 2001 | na | na | 9   | 2010 | Castillo et al. 2016                                  |
| JC038 | Sheldon Plateau | Fish Creek Mountain | NV | 41.7510340 | -119.3475960 | 2003 | na | na | 9   | 2010 | Castillo et al. 2016                                  |
| JC039 | Sheldon Plateau | Fish Creek Mountain | NV | 41.7506340 | -119.3469960 | 2018 | na | na | 340 | 2010 | Castillo et al. 2016                                  |
| JC040 | Sheldon Plateau | Fish Creek Mountain | NV | 41.7505140 | -119.3468960 | 2019 | na | na | 334 | 2010 | Castillo et al. 2016                                  |
| JC041 | Sheldon Plateau | Fish Creek Mountain | NV | 41.7501340 | -119.3460160 | 2029 | na | na | 346 | 2010 | Castillo et al. 2016                                  |
| JC042 | Sheldon Plateau | Fish Creek Mountain | NV | 41.7501740 | -119.3459860 | 2028 | na | na | 346 | 2010 | Castillo et al. 2016                                  |
| JC043 | Sheldon Plateau | Fish Creek Mountain | NV | 41.7499940 | -119.3454760 | 2040 | na | na | 21  | 2010 | Castillo et al. 2016                                  |
| JC044 | Sheldon Plateau | Fish Creek Mountain | NV | 41.7498640 | -119.3452260 | 2038 | na | na | 30  | 2010 | Castillo et al. 2016                                  |
| JC045 | Sheldon Plateau | Fish Creek Mountain | NV | 41.7498540 | -119.3451660 | 2038 | na | na | 30  | 2010 | Castillo et al. 2016                                  |
| JC046 | Sheldon Plateau | Blowout Mountain    | NV | 41.7170340 | -119.2739460 | 1976 | na | na | 174 | 2010 | Castillo et al. 2016                                  |
| JC047 | Sheldon Plateau | Blowout Mountain    | NV | 41.7163040 | -119.2734660 | 1958 | na | na | 142 | 2010 | Castillo et al. 2016                                  |
| JC048 | Sheldon Plateau | Blowout Mountain    | NV | 41.7263740 | -119.2709760 | 2045 | na | na | 163 | 2010 | Castillo et al. 2016                                  |
| JC049 | Sheldon Plateau | Blowout Mountain    | NV | 41.7241640 | -119.2701860 | 2050 | na | na | 50  | 2010 | Castillo et al. 2016                                  |
| JC050 | Sheldon Plateau | Blowout Mountain    | NV | 41.7253240 | -119.2700560 | 2042 | na | na | 57  | 2010 | Castillo et al. 2016                                  |
| JC051 | Sheldon Plateau | Blowout Mountain    | NV | 41.7206240 | -119.2684660 | 1974 | na | na | 239 | 2010 | Castillo et al. 2016                                  |

|       |                 |                     |    |            |              |      |    |    |     |      |                      |
|-------|-----------------|---------------------|----|------------|--------------|------|----|----|-----|------|----------------------|
| JC052 | Sheldon Plateau | Blowout Mountain    | NV | 41.7208940 | -119.2683660 | 1984 | na | na | 201 | 2010 | Castillo et al. 2016 |
| JC053 | Sheldon Plateau | Blowout Mountain    | NV | 41.7213040 | -119.2682360 | 1998 | na | na | 202 | 2010 | Castillo et al. 2016 |
| JC054 | Sheldon Plateau | Blowout Mountain    | NV | 41.7214140 | -119.2681660 | 1994 | na | na | 188 | 2010 | Castillo et al. 2016 |
| JC055 | Sheldon Plateau | Blowout Mountain    | NV | 41.7220840 | -119.2678160 | 2009 | na | na | 235 | 2010 | Castillo et al. 2016 |
| JC056 | Sheldon Plateau | Blowout Mountain    | NV | 41.7220140 | -119.2677160 | 2012 | na | na | 250 | 2010 | Castillo et al. 2016 |
| JC057 | Sheldon Plateau | Blowout Mountain    | NV | 41.7227840 | -119.2673660 | 2031 | na | na | 253 | 2010 | Castillo et al. 2016 |
| JC058 | Sheldon Plateau | Blowout Mountain    | NV | 41.7257740 | -119.2673060 | 2059 | na | na | 225 | 2010 | Castillo et al. 2016 |
| JC059 | Sheldon Plateau | Blowout Mountain    | NV | 41.7234140 | -119.2671360 | 2042 | na | na | 252 | 2010 | Castillo et al. 2016 |
| JC060 | Sheldon Plateau | Blowout Mountain    | NV | 41.7234640 | -119.2668660 | 2066 | na | na | 266 | 2010 | Castillo et al. 2016 |
| JC061 | Sheldon Plateau | Blowout Mountain    | NV | 41.7254640 | -119.2668560 | 2072 | na | na | 223 | 2010 | Castillo et al. 2016 |
| JC062 | Sheldon Plateau | Blowout Mountain    | NV | 41.7236340 | -119.2662960 | 2094 | na | na | 259 | 2010 | Castillo et al. 2016 |
| JC063 | Sheldon Plateau | Blowout Mountain    | NV | 41.7250840 | -119.2656260 | 2107 | na | na | 157 | 2010 | Castillo et al. 2016 |
| JC064 | Sheldon Plateau | Blowout Mountain    | NV | 41.7253340 | -119.2745560 | 2014 | na | na | 329 | 2010 | Castillo et al. 2016 |
| JC065 | Sheldon Plateau | Blowout Mountain    | NV | 41.7252140 | -119.2745260 | 2010 | na | na | 348 | 2010 | Castillo et al. 2016 |
| JC066 | Sheldon Plateau | Blowout Mountain    | NV | 41.7254240 | -119.2744660 | 2009 | na | na | 329 | 2010 | Castillo et al. 2016 |
| JC067 | Sheldon Plateau | Blowout Mountain    | NV | 41.7223440 | -119.2743260 | 2047 | na | na | 283 | 2010 | Castillo et al. 2016 |
| JC068 | Sheldon Plateau | Blowout Mountain    | NV | 41.7254640 | -119.2740760 | 2007 | na | na | 270 | 2010 | Castillo et al. 2016 |
| JC069 | Sheldon Plateau | Blowout Mountain    | NV | 41.7170340 | -119.2736760 | 1971 | na | na | 174 | 2010 | Castillo et al. 2016 |
| JC070 | Sheldon Plateau | Blowout Mountain    | NV | 41.7171440 | -119.2735160 | 1976 | na | na | 171 | 2010 | Castillo et al. 2016 |
| JC071 | Sheldon Plateau | Blowout Mountain    | NV | 41.7256140 | -119.2737060 | 2011 | na | na | 238 | 2010 | Castillo et al. 2016 |
| JC072 | Sheldon Plateau | Blowout Mountain    | NV | 41.7243040 | -119.2735660 | 2037 | na | na | 320 | 2010 | Castillo et al. 2016 |
| JC073 | Sheldon Plateau | Blowout Mountain    | NV | 41.7238540 | -119.2705160 | 2048 | na | na | 160 | 2010 | Castillo et al. 2016 |
| JC074 | Sheldon Plateau | Blowout Mountain    | NV | 41.7248640 | -119.2698160 | 2049 | na | na | 82  | 2010 | Castillo et al. 2016 |
| JC075 | Sheldon Plateau | Blowout Mountain    | NV | 41.7246940 | -119.2696760 | 2042 | na | na | 84  | 2010 | Castillo et al. 2016 |
| JC076 | Sheldon Plateau | Mahogany Butte      | NV | 41.6111640 | -119.2148060 | 2057 | na | na | 125 | 2010 | Castillo et al. 2016 |
| JC077 | Sheldon Plateau | Mahogany Butte      | NV | 41.6112840 | -119.2145860 | 2053 | na | na | 123 | 2010 | Castillo et al. 2016 |
| JC078 | Sheldon Plateau | Mahogany Butte      | NV | 41.6156840 | -119.2112060 | 2078 | na | na | 56  | 2010 | Castillo et al. 2016 |
| JC079 | Sheldon Plateau | Mahogany Butte      | NV | 41.6157940 | -119.2111260 | 2069 | na | na | 56  | 2010 | Castillo et al. 2016 |
| JC080 | Sheldon Plateau | Mahogany Butte      | NV | 41.6154540 | -119.2111060 | 2075 | na | na | 79  | 2010 | Castillo et al. 2016 |
| JC081 | Sheldon Plateau | Mahogany Butte      | NV | 41.6156740 | -119.2110960 | 2073 | na | na | 61  | 2010 | Castillo et al. 2016 |
| JC082 | Sheldon Plateau | Mahogany Butte      | NV | 41.6153840 | -119.2107360 | 2072 | na | na | 81  | 2010 | Castillo et al. 2016 |
| JC083 | Sheldon Plateau | Mahogany Butte      | NV | 41.6160340 | -119.2105360 | 2051 | na | na | 64  | 2010 | Castillo et al. 2016 |
| JC084 | Sheldon Plateau | Mahogany Butte      | NV | 41.6160140 | -119.2105160 | 2055 | na | na | 64  | 2010 | Castillo et al. 2016 |
| JC085 | Sheldon Plateau | Mahogany Butte      | NV | 41.6160040 | -119.2104360 | 2051 | na | na | 64  | 2010 | Castillo et al. 2016 |
| JC086 | Sheldon Plateau | S of Mahogany Butte | NV | 41.5995040 | -119.2176660 | 1947 | na | na | 303 | 2010 | Castillo et al. 2016 |
| JC087 | Sheldon Plateau | S of Mahogany Butte | NV | 41.5994940 | -119.2176260 | 1948 | na | na | 303 | 2010 | Castillo et al. 2016 |
| JC088 | Sheldon Plateau | S of Mahogany Butte | NV | 41.5995540 | -119.2174460 | 1952 | na | na | 330 | 2010 | Castillo et al. 2016 |
| JC089 | Sheldon Plateau | S of Mahogany Butte | NV | 41.5997640 | -119.2173560 | 1946 | na | na | 351 | 2010 | Castillo et al. 2016 |
| JC090 | Sheldon Plateau | S of Mahogany Butte | NV | 41.5996940 | -119.2171260 | 1956 | na | na | 347 | 2010 | Castillo et al. 2016 |
| JC091 | Sheldon Plateau | S of Mahogany Butte | NV | 41.5998540 | -119.2171060 | 1949 | na | na | 357 | 2010 | Castillo et al. 2016 |
| JC092 | Sheldon Plateau | S of Mahogany Butte | NV | 41.6000040 | -119.2168960 | 1928 | na | na | 358 | 2010 | Castillo et al. 2016 |
| JC093 | Sheldon Plateau | S of Mahogany Butte | NV | 41.5999840 | -119.2166660 | 1944 | na | na | 356 | 2010 | Castillo et al. 2016 |
| JC094 | Sheldon Plateau | S of Mahogany Butte | NV | 41.6014640 | -119.2164860 | 1928 | na | na | 311 | 2010 | Castillo et al. 2016 |
| JC095 | Sheldon Plateau | S of Mahogany Butte | NV | 41.6000540 | -119.2164360 | 1948 | na | na | 342 | 2010 | Castillo et al. 2016 |
| JC096 | Sheldon Plateau | S of Mahogany Butte | NV | 41.6018940 | -119.2164060 | 1916 | na | na | 343 | 2010 | Castillo et al. 2016 |
| JC097 | Sheldon Plateau | S of Mahogany Butte | NV | 41.6019640 | -119.2163660 | 1919 | na | na | 329 | 2010 | Castillo et al. 2016 |
| JC098 | Sheldon Plateau | S of Mahogany Butte | NV | 41.6018940 | -119.2163360 | 1922 | na | na | 320 | 2010 | Castillo et al. 2016 |
| JC099 | Sheldon Plateau | S of Mahogany Butte | NV | 41.6030940 | -119.2157760 | 1902 | na | na | 299 | 2010 | Castillo et al. 2016 |
| JC100 | Sheldon Plateau | S of Mahogany Butte | NV | 41.6032040 | -119.2153060 | 1917 | na | na | 301 | 2010 | Castillo et al. 2016 |

|       |                 |                     |    |            |              |      |    |    |     |      |                      |
|-------|-----------------|---------------------|----|------------|--------------|------|----|----|-----|------|----------------------|
| JC101 | Sheldon Plateau | S of Mahogany Butte | NV | 41.6032740 | -119.2152460 | 1924 | na | na | 316 | 2010 | Castillo et al. 2016 |
| JC102 | Sheldon Plateau | S of Mahogany Butte | NV | 41.6012540 | -119.2151460 | 1942 | na | na | 313 | 2010 | Castillo et al. 2016 |
| JC103 | Sheldon Plateau | S of Mahogany Butte | NV | 41.6035140 | -119.2149460 | 1925 | na | na | 355 | 2010 | Castillo et al. 2016 |
| JC104 | Hart Mountains  | Willow Creek Canyon | OR | 42.5347090 | -119.7032000 | 1974 | na | na | 358 | 2010 | Castillo et al. 2016 |
| JC105 | Hart Mountains  | Willow Creek Canyon | OR | 42.5353790 | -119.7031800 | 1955 | na | na | 4   | 2010 | Castillo et al. 2016 |
| JC106 | Hart Mountains  | Willow Creek Canyon | OR | 42.5348300 | -119.7031300 | 1968 | na | na | 341 | 2010 | Castillo et al. 2016 |
| JC107 | Hart Mountains  | Willow Creek Canyon | OR | 42.5354200 | -119.7031400 | 1955 | na | na | 4   | 2010 | Castillo et al. 2016 |
| JC108 | Hart Mountains  | Willow Creek Canyon | OR | 42.5350390 | -119.7031200 | 1969 | na | na | 352 | 2010 | Castillo et al. 2016 |
| JC109 | Hart Mountains  | Willow Creek Canyon | OR | 42.5351000 | -119.7031100 | 1968 | na | na | 352 | 2010 | Castillo et al. 2016 |
| JC110 | Hart Mountains  | Willow Creek Canyon | OR | 42.5349690 | -119.7031000 | 1967 | na | na | 341 | 2010 | Castillo et al. 2016 |
| JC111 | Hart Mountains  | Willow Creek Canyon | OR | 42.5352800 | -119.7031000 | 1958 | na | na | 4   | 2010 | Castillo et al. 2016 |
| JC112 | Hart Mountains  | Willow Creek Canyon | OR | 42.5352290 | -119.7030900 | 1963 | na | na | 352 | 2010 | Castillo et al. 2016 |
| JC113 | Hart Mountains  | Willow Creek Canyon | OR | 42.5355400 | -119.7030500 | 1951 | na | na | 7   | 2010 | Castillo et al. 2016 |
| JC114 | Hart Mountains  | Willow Creek Canyon | OR | 42.5354790 | -119.7030300 | 1950 | na | na | 7   | 2010 | Castillo et al. 2016 |
| JC115 | Hart Mountains  | Willow Creek Canyon | OR | 42.5356290 | -119.7029500 | 1949 | na | na | 7   | 2010 | Castillo et al. 2016 |
| JC116 | Hart Mountains  | Willow Creek Canyon | OR | 42.5396100 | -119.7031100 | 2054 | na | na | 111 | 2010 | Castillo et al. 2016 |
| JC117 | Hart Mountains  | Willow Creek Canyon | OR | 42.5356390 | -119.7028800 | 1947 | na | na | 7   | 2010 | Castillo et al. 2016 |
| JC118 | Hart Mountains  | Willow Creek Canyon | OR | 42.5356890 | -119.7028700 | 1946 | na | na | 7   | 2010 | Castillo et al. 2016 |
| JC119 | Hart Mountains  | Willow Creek Canyon | OR | 42.5345400 | -119.7023500 | 1982 | na | na | 22  | 2010 | Castillo et al. 2016 |
| JC120 | Hart Mountains  | Willow Creek Canyon | OR | 42.5347990 | -119.7021300 | 1970 | na | na | 32  | 2010 | Castillo et al. 2016 |
| JC121 | Hart Mountains  | Willow Creek Canyon | OR | 42.5348290 | -119.7020900 | 1968 | na | na | 32  | 2010 | Castillo et al. 2016 |
| JC122 | Hart Mountains  | Willow Creek Canyon | OR | 42.5348500 | -119.7019200 | 1964 | na | na | 30  | 2010 | Castillo et al. 2016 |
| JC123 | Hart Mountains  | Willow Creek Canyon | OR | 42.5349100 | -119.7016200 | 1961 | na | na | 26  | 2010 | Castillo et al. 2016 |
| JC124 | Hart Mountains  | Willow Creek Canyon | OR | 42.5348600 | -119.7015500 | 1953 | na | na | 26  | 2010 | Castillo et al. 2016 |
| JC125 | Hart Mountains  | Willow Creek Canyon | OR | 42.5397100 | -119.7017100 | 2019 | na | na | 73  | 2010 | Castillo et al. 2016 |
| JC126 | Hart Mountains  | Willow Creek Canyon | OR | 42.5347990 | -119.7014600 | 1951 | na | na | 26  | 2010 | Castillo et al. 2016 |
| JC127 | Hart Mountains  | Willow Creek Canyon | OR | 42.5372790 | -119.7012000 | 1911 | na | na | 51  | 2010 | Castillo et al. 2016 |
| JC128 | Hart Mountains  | Willow Creek Canyon | OR | 42.5349790 | -119.7010090 | 1937 | na | na | 10  | 2010 | Castillo et al. 2016 |
| JC129 | Hart Mountains  | Willow Creek Canyon | OR | 42.5349300 | -119.7010000 | 1940 | na | na | 10  | 2010 | Castillo et al. 2016 |
| JC130 | Hart Mountains  | Willow Creek Canyon | OR | 42.5350500 | -119.7008500 | 1929 | na | na | 19  | 2010 | Castillo et al. 2016 |
| JC131 | Hart Mountains  | Willow Creek Canyon | OR | 42.5350700 | -119.7007600 | 1928 | na | na | 20  | 2010 | Castillo et al. 2016 |
| JC132 | Hart Mountains  | Willow Creek Canyon | OR | 42.5352300 | -119.7006400 | 1928 | na | na | 20  | 2010 | Castillo et al. 2016 |
| JC133 | Hart Mountains  | Willow Creek Canyon | OR | 42.5398400 | -119.7007500 | 1966 | na | na | 78  | 2010 | Castillo et al. 2016 |
| JC134 | Hart Mountains  | Willow Creek Canyon | OR | 42.5401300 | -119.7006300 | 1965 | na | na | 98  | 2010 | Castillo et al. 2016 |
| JC135 | Hart Mountains  | Willow Creek Canyon | OR | 42.5353990 | -119.7003800 | 1924 | na | na | 38  | 2010 | Castillo et al. 2016 |
| JC136 | Hart Mountains  | Willow Creek Canyon | OR | 42.5402890 | -119.7004900 | 1964 | na | na | 87  | 2010 | Castillo et al. 2016 |
| JC137 | Hart Mountains  | Willow Creek Canyon | OR | 42.5402500 | -119.7004700 | 1965 | na | na | 91  | 2010 | Castillo et al. 2016 |
| JC139 | Hart Mountains  | Willow Creek Canyon | OR | 42.5360790 | -119.7001700 | 1919 | na | na | 86  | 2010 | Castillo et al. 2016 |
| JC140 | Hart Mountains  | Willow Creek Canyon | OR | 42.5361300 | -119.7001700 | 1915 | na | na | 90  | 2010 | Castillo et al. 2016 |
| JC141 | Hart Mountains  | Willow Creek Canyon | OR | 42.5359900 | -119.7001600 | 1916 | na | na | 86  | 2010 | Castillo et al. 2016 |
| JC142 | Hart Mountains  | Willow Creek Canyon | OR | 42.5402300 | -119.7001500 | 1952 | na | na | 82  | 2010 | Castillo et al. 2016 |
| JC143 | Hart Mountains  | Willow Creek Canyon | OR | 42.5402200 | -119.6998500 | 1935 | na | na | 74  | 2010 | Castillo et al. 2016 |
| JC144 | Hart Mountains  | Willow Creek Canyon | OR | 42.5402090 | -119.6996900 | 1936 | na | na | 68  | 2010 | Castillo et al. 2016 |
| JC145 | Hart Mountains  | Willow Creek Canyon | OR | 42.5401990 | -119.6995390 | 1925 | na | na | 68  | 2010 | Castillo et al. 2016 |
| JC146 | Hart Mountains  | Willow Creek Canyon | OR | 42.5401990 | -119.6993890 | 1923 | na | na | 65  | 2010 | Castillo et al. 2016 |
| JC147 | Hart Mountains  | Willow Creek Canyon | OR | 42.5401800 | -119.6993000 | 1921 | na | na | 65  | 2010 | Castillo et al. 2016 |
| JC148 | Hart Mountains  | Willow Creek Canyon | OR | 42.5401490 | -119.6992500 | 1914 | na | na | 65  | 2010 | Castillo et al. 2016 |
| JC149 | Hart Mountains  | Willow Creek Canyon | OR | 42.5402200 | -119.6992400 | 1912 | na | na | 65  | 2010 | Castillo et al. 2016 |
| JC150 | Hart Mountains  | Willow Creek Canyon | OR | 42.5400190 | -119.6988800 | 1907 | na | na | 70  | 2010 | Castillo et al. 2016 |

|       |                |                     |    |            |              |      |    |    |     |      |                      |
|-------|----------------|---------------------|----|------------|--------------|------|----|----|-----|------|----------------------|
| JC151 | Hart Mountains | Willow Creek Canyon | OR | 42.5400500 | -119.6988100 | 1904 | na | na | 70  | 2010 | Castillo et al. 2016 |
| JC152 | Hart Mountains | Willow Creek Canyon | OR | 42.5396700 | -119.6987500 | 1896 | na | na | 114 | 2010 | Castillo et al. 2016 |
| JC153 | Hart Mountains | Willow Creek Canyon | OR | 42.5398590 | -119.6987400 | 1893 | na | na | 96  | 2010 | Castillo et al. 2016 |
| JC154 | Hart Mountains | Willow Creek Canyon | OR | 42.5399390 | -119.6986800 | 1906 | na | na | 96  | 2010 | Castillo et al. 2016 |
| JC155 | Hart Mountains | Calderwood Ranch    | OR | 42.3814700 | -119.7728800 | 2187 | na | na | 190 | 2010 | Castillo et al. 2016 |
| JC156 | Hart Mountains | Calderwood Ranch    | OR | 42.3800100 | -119.7725000 | 2182 | na | na | 51  | 2010 | Castillo et al. 2016 |
| JC157 | Hart Mountains | Calderwood Ranch    | OR | 42.3800800 | -119.7723200 | 2167 | na | na | 56  | 2010 | Castillo et al. 2016 |
| JC158 | Hart Mountains | Calderwood Ranch    | OR | 42.3813590 | -119.7721600 | 2196 | na | na | 208 | 2010 | Castillo et al. 2016 |
| JC159 | Hart Mountains | Calderwood Ranch    | OR | 42.3799090 | -119.7717100 | 2133 | na | na | 95  | 2010 | Castillo et al. 2016 |
| JC160 | Hart Mountains | Calderwood Ranch    | OR | 42.3798600 | -119.7707100 | 2147 | na | na | 225 | 2010 | Castillo et al. 2016 |
| JC161 | Hart Mountains | N of Willow Creek   | OR | 42.5402880 | -119.7171300 | 2172 | na | na | 136 | 2011 | Castillo et al. 2016 |
| JC162 | Hart Mountains | N of Willow Creek   | OR | 42.5405380 | -119.7168120 | 2173 | na | na | 136 | 2011 | Castillo et al. 2016 |
| JC163 | Hart Mountains | N of Willow Creek   | OR | 42.5408820 | -119.7163640 | 2171 | na | na | 136 | 2011 | Castillo et al. 2016 |
| JC164 | Hart Mountains | N of Willow Creek   | OR | 42.5411290 | -119.7158140 | 2164 | na | na | 138 | 2011 | Castillo et al. 2016 |
| JC165 | Hart Mountains | N of Willow Creek   | OR | 42.5416680 | -119.7151310 | 2165 | na | na | 143 | 2011 | Castillo et al. 2016 |
| JC166 | Hart Mountains | N of Willow Creek   | OR | 42.5485820 | -119.7114000 | 2141 | na | na | 82  | 2011 | Castillo et al. 2016 |
| JC167 | Hart Mountains | N of Willow Creek   | OR | 42.5463630 | -119.7047280 | 2048 | na | na | 89  | 2011 | Castillo et al. 2016 |
| JC168 | Hart Mountains | N of Willow Creek   | OR | 42.5465700 | -119.7047250 | 2043 | na | na | 82  | 2011 | Castillo et al. 2016 |
| JC169 | Hart Mountains | N of Willow Creek   | OR | 42.5460930 | -119.7046920 | 2056 | na | na | 92  | 2011 | Castillo et al. 2016 |
| JC170 | Hart Mountains | N of Willow Creek   | OR | 42.5472300 | -119.7023050 | 1959 | na | na | 122 | 2011 | Castillo et al. 2016 |
| JC171 | Hart Mountains | Degarmo Canyon      | OR | 42.4788460 | -119.7630800 | 2169 | na | na | 347 | 2011 | Castillo et al. 2016 |
| JC172 | Hart Mountains | Degarmo Canyon      | OR | 42.4782990 | -119.7629950 | 2211 | na | na | 343 | 2011 | Castillo et al. 2016 |
| JC173 | Hart Mountains | Degarmo Canyon      | OR | 42.4780570 | -119.7625580 | 2240 | na | na | 333 | 2011 | Castillo et al. 2016 |
| JC174 | Hart Mountains | Degarmo Canyon      | OR | 42.4782210 | -119.7625050 | 2230 | na | na | 333 | 2011 | Castillo et al. 2016 |
| JC175 | Hart Mountains | N of Willow Creek   | OR | 42.5543910 | -119.7132840 | 1948 | na | na | 31  | 2011 | Castillo et al. 2016 |
| JC176 | Hart Mountains | N of Willow Creek   | OR | 42.5544290 | -119.7124090 | 1937 | na | na | 357 | 2011 | Castillo et al. 2016 |
| JC177 | Hart Mountains | N of Willow Creek   | OR | 42.5546410 | -119.7122110 | 1926 | na | na | 348 | 2011 | Castillo et al. 2016 |
| JC178 | Hart Mountains | N of Willow Creek   | OR | 42.5550130 | -119.7120810 | 1915 | na | na | 348 | 2011 | Castillo et al. 2016 |
| JC179 | Hart Mountains | N of Willow Creek   | OR | 42.5552660 | -119.7120670 | 1910 | na | na | 348 | 2011 | Castillo et al. 2016 |
| JC180 | Hart Mountains | N of Willow Creek   | OR | 42.5557740 | -119.7115410 | 1900 | na | na | 340 | 2011 | Castillo et al. 2016 |
| JC181 | Hart Mountains | N of Willow Creek   | OR | 42.5557280 | -119.7111980 | 1906 | na | na | 335 | 2011 | Castillo et al. 2016 |
| JC182 | Hart Mountains | N of Willow Creek   | OR | 42.5577560 | -119.7088130 | 1911 | na | na | 282 | 2011 | Castillo et al. 2016 |
| JC183 | Hart Mountains | N of Willow Creek   | OR | 42.5574780 | -119.7087530 | 1913 | na | na | 279 | 2011 | Castillo et al. 2016 |
| JC184 | Hart Mountains | N of Willow Creek   | OR | 42.5583600 | -119.7087910 | 1901 | na | na | 280 | 2011 | Castillo et al. 2016 |
| JC185 | Hart Mountains | N of Willow Creek   | OR | 42.5574320 | -119.7026970 | 1857 | na | na | 73  | 2011 | Castillo et al. 2016 |
| JC186 | Hart Mountains | Bog Creek           | OR | 42.3807260 | -119.7642360 | 2066 | na | na | 81  | 2011 | Castillo et al. 2016 |
| JC187 | Hart Mountains | Bog Creek           | OR | 42.3817190 | -119.7589110 | 1951 | na | na | 142 | 2011 | Castillo et al. 2016 |
| JC188 | Hart Mountains | Bog Creek           | OR | 42.3813750 | -119.7582400 | 1937 | na | na | 135 | 2011 | Castillo et al. 2016 |
| JC189 | Hart Mountains | Bog Creek           | OR | 42.3809820 | -119.7569720 | 1910 | na | na | 135 | 2011 | Castillo et al. 2016 |
| JC190 | Hart Mountains | Bog Creek           | OR | 42.3809840 | -119.7568870 | 1913 | na | na | 130 | 2011 | Castillo et al. 2016 |
| JC191 | Hart Mountains | Bog Creek           | OR | 42.3807770 | -119.7565380 | 1905 | na | na | 125 | 2011 | Castillo et al. 2016 |
| JC192 | Hart Mountains | Bog Creek           | OR | 42.3807260 | -119.7564020 | 1900 | na | na | 125 | 2011 | Castillo et al. 2016 |
| JC193 | Hart Mountains | Bog Creek           | OR | 42.3804250 | -119.7561700 | 1891 | na | na | 124 | 2011 | Castillo et al. 2016 |
| JC194 | Hart Mountains | Bog Creek           | OR | 42.3803450 | -119.7557780 | 1872 | na | na | 119 | 2011 | Castillo et al. 2016 |
| JC195 | Hart Mountains | Bog Creek           | OR | 42.3803380 | -119.7556680 | 1879 | na | na | 119 | 2011 | Castillo et al. 2016 |
| JC196 | Hart Mountains | Bog Creek           | OR | 42.3805740 | -119.7552410 | 1869 | na | na | 127 | 2011 | Castillo et al. 2016 |
| JC197 | Hart Mountains | Bog Creek           | OR | 42.3806300 | -119.7551590 | 1858 | na | na | 127 | 2011 | Castillo et al. 2016 |
| JC198 | Hart Mountains | Bog Creek           | OR | 42.3805890 | -119.7549750 | 1853 | na | na | 133 | 2011 | Castillo et al. 2016 |
| JC199 | Hart Mountains | Bog Creek           | OR | 42.3792950 | -119.7533880 | 1815 | na | na | 153 | 2011 | Castillo et al. 2016 |

|         |                 |                        |    |            |              |      |    |    |     |      |                      |
|---------|-----------------|------------------------|----|------------|--------------|------|----|----|-----|------|----------------------|
| JC200   | Hart Mountains  | Bog Creek              | OR | 42.3794290 | -119.7530530 | 1811 | na | na | 135 | 2011 | Castillo et al. 2016 |
| JC201   | Hart Mountains  | Bog Creek              | OR | 42.3796310 | -119.7528680 | 1809 | na | na | 135 | 2011 | Castillo et al. 2016 |
| JC202   | Hart Mountains  | Bog Creek              | OR | 42.3800220 | -119.7527030 | 1816 | na | na | 142 | 2011 | Castillo et al. 2016 |
| JC203   | Hart Mountains  | Bog Creek              | OR | 42.3799620 | -119.7526150 | 1815 | na | na | 135 | 2011 | Castillo et al. 2016 |
| JC204   | Massacre Rim    | na                     | NV | 41.7554760 | -119.6979770 | 1838 | na | na | 325 | 2011 | Castillo et al. 2016 |
| JC205   | Massacre Rim    | na                     | NV | 41.7555610 | -119.6974400 | 1842 | na | na | 287 | 2011 | Castillo et al. 2016 |
| JC206   | Massacre Rim    | na                     | NV | 41.7556610 | -119.6970110 | 1845 | na | na | 289 | 2011 | Castillo et al. 2016 |
| JC207   | Massacre Rim    | na                     | NV | 41.7557620 | -119.6969310 | 1847 | na | na | 295 | 2011 | Castillo et al. 2016 |
| JC208   | Massacre Rim    | na                     | NV | 41.7554170 | -119.6966880 | 1854 | na | na | 318 | 2011 | Castillo et al. 2016 |
| JC209   | Massacre Rim    | na                     | NV | 41.7550670 | -119.6966010 | 1858 | na | na | 330 | 2011 | Castillo et al. 2016 |
| JC210   | Massacre Rim    | na                     | NV | 41.7549480 | -119.6963320 | 1867 | na | na | 331 | 2011 | Castillo et al. 2016 |
| JC211   | Massacre Rim    | na                     | NV | 41.7549620 | -119.6957190 | 1885 | na | na | 326 | 2011 | Castillo et al. 2016 |
| JC212   | Massacre Rim    | na                     | NV | 41.7574270 | -119.6923940 | 1885 | na | na | 333 | 2011 | Castillo et al. 2016 |
| JC213   | Massacre Rim    | na                     | NV | 41.7575010 | -119.6915430 | 1889 | na | na | 317 | 2011 | Castillo et al. 2016 |
| JC214   | Sheldon Plateau | 2 km NE Andy's Place   | NV | 41.8089710 | -119.3673390 | 1953 | na | na | 264 | 2011 | Castillo et al. 2016 |
| JC215   | Sheldon Plateau | 2 km NE Andy's Place   | NV | 41.8078480 | -119.3667430 | 1947 | na | na | 194 | 2011 | Castillo et al. 2016 |
| JC216   | Sheldon Plateau | 2 km NE Andy's Place   | NV | 41.8087370 | -119.3664270 | 1974 | na | na | 200 | 2011 | Castillo et al. 2016 |
| JC217   | Sheldon Plateau | 2 km NE Andy's Place   | NV | 41.8087470 | -119.3663910 | 1972 | na | na | 200 | 2011 | Castillo et al. 2016 |
| JC218   | Sheldon Plateau | 2 km NE Andy's Place   | NV | 41.8086990 | -119.3661010 | 1975 | na | na | 177 | 2011 | Castillo et al. 2016 |
| JC219   | Sheldon Plateau | 2 km NE Andy's Place   | NV | 41.8087030 | -119.3658960 | 1982 | na | na | 177 | 2011 | Castillo et al. 2016 |
| JC220   | Sheldon Plateau | 2 km NE Andy's Place   | NV | 41.8080870 | -119.3656570 | 1963 | na | na | 180 | 2011 | Castillo et al. 2016 |
| JC221   | Sheldon Plateau | 2 km NE Andy's Place   | NV | 41.8040440 | -119.3643160 | 1964 | na | na | 321 | 2011 | Castillo et al. 2016 |
| JC222   | Sheldon Plateau | 2 km NE Andy's Place   | NV | 41.8039100 | -119.3638060 | 1974 | na | na | 318 | 2011 | Castillo et al. 2016 |
| JC223   | Sheldon Plateau | 2 km NE Andy's Place   | NV | 41.8079700 | -119.3608500 | 1983 | na | na | 334 | 2011 | Castillo et al. 2016 |
| JC224   | Sheldon Plateau | 2 km NE Andy's Place   | NV | 41.8077970 | -119.3604940 | 1993 | na | na | 9   | 2011 | Castillo et al. 2016 |
| JC225   | Sheldon Plateau | 2 km NE Andy's Place   | NV | 41.8075170 | -119.3600990 | 1994 | na | na | 19  | 2011 | Castillo et al. 2016 |
| JC226   | Sheldon Plateau | 2 KM SE Bateman Spring | NV | 41.5866550 | -119.2414040 | 1965 | na | na | 342 | 2011 | Castillo et al. 2016 |
| JC227   | Sheldon Plateau | 2 KM SE Bateman Spring | NV | 41.5865440 | -119.2406210 | 1974 | na | na | 323 | 2011 | Castillo et al. 2016 |
| JC228   | Sheldon Plateau | 2 KM SE Bateman Spring | NV | 41.5868610 | -119.2405590 | 1966 | na | na | 305 | 2011 | Castillo et al. 2016 |
| JC229   | Sheldon Plateau | 2 KM SE Bateman Spring | NV | 41.5873670 | -119.2404690 | 1972 | na | na | 305 | 2011 | Castillo et al. 2016 |
| JC230   | Sheldon Plateau | 2 KM SE Bateman Spring | NV | 41.5869810 | -119.2404200 | 1977 | na | na | 305 | 2011 | Castillo et al. 2016 |
| JVG-088 | Sheldon Plateau | Washoe County          | NV | 41.9249150 | -119.6447200 | 1899 | na | na | 305 | 2016 | VanGunst Unpublished |
| JVG-089 | Sheldon Plateau | Washoe County          | NV | 41.9249350 | -119.6447000 | 1899 | na | na | 305 | 2016 | VanGunst Unpublished |
| JVG-090 | Sheldon Plateau | Washoe County          | NV | 41.9249220 | -119.6446400 | 1899 | na | na | 305 | 2016 | VanGunst Unpublished |
| JVG-091 | Sheldon Plateau | Washoe County          | NV | 41.9238280 | -119.6436300 | 1935 | na | na | 297 | 2016 | VanGunst Unpublished |
| JVG-105 | Sheldon Plateau | Washoe County          | NV | 41.9248681 | -119.6448000 | 1890 | na | na | 304 | 2016 | VanGunst Unpublished |
| JVG-106 | Sheldon Plateau | Washoe County          | NV | 41.9247534 | -119.6448000 | 1890 | na | na | 304 | 2016 | VanGunst Unpublished |
| JVG-107 | Sheldon Plateau | Washoe County          | NV | 41.9247637 | -119.6447800 | 1890 | na | na | 304 | 2016 | VanGunst Unpublished |
| JVG-110 | Sheldon Plateau | Washoe County          | NV | 41.9246571 | -119.6447200 | 1903 | na | na | 298 | 2016 | VanGunst Unpublished |
| JVG-111 | Sheldon Plateau | Washoe County          | NV | 41.9245824 | -119.6447400 | 1895 | na | na | 296 | 2016 | VanGunst Unpublished |
| JVG-114 | Sheldon Plateau | Washoe County          | NV | 41.9241100 | -119.6435600 | 1937 | na | na | 291 | 2016 | VanGunst Unpublished |
| JVG-35  | High Rock       | Washoe County          | NV | 41.5327286 | -119.6169600 | 2052 | na | na | 72  | 2016 | VanGunst Unpublished |
| JVG-36  | High Rock       | Washoe County          | NV | 41.5327296 | -119.6169600 | 2052 | na | na | 72  | 2016 | VanGunst Unpublished |
| JVG-37  | High Rock       | Washoe County          | NV | 41.5327436 | -119.6169700 | 2052 | na | na | 72  | 2016 | VanGunst Unpublished |
| JVG-38  | High Rock       | Washoe County          | NV | 41.5330506 | -119.6172100 | 2050 | na | na | 76  | 2016 | VanGunst Unpublished |
| JVG-39  | High Rock       | Washoe County          | NV | 41.5332305 | -119.6173000 | 2055 | na | na | 96  | 2016 | VanGunst Unpublished |
| JVG-40  | High Rock       | Washoe County          | NV | 41.5333492 | -119.6173600 | 2056 | na | na | 111 | 2016 | VanGunst Unpublished |
| JVG-41  | High Rock       | Washoe County          | NV | 41.5332793 | -119.6173100 | 2055 | na | na | 96  | 2016 | VanGunst Unpublished |
| JVG-42  | High Rock       | Washoe County          | NV | 41.5332891 | -119.6172800 | 2055 | na | na | 96  | 2016 | VanGunst Unpublished |



|        |                      |               |    |             |              |      |    |    |     |      |                                                          |
|--------|----------------------|---------------|----|-------------|--------------|------|----|----|-----|------|----------------------------------------------------------|
| JVG-43 | High Rock            | Washoe County | NV | 41.5333597  | -119.6173000 | 2056 | na | na | 111 | 2016 | VanGunst Unpublished                                     |
| JVG-44 | High Rock            | Washoe County | NV | 41.5333614  | -119.6173700 | 2056 | na | na | 111 | 2016 | VanGunst Unpublished                                     |
| JVG-45 | High Rock            | Washoe County | NV | 41.5337506  | -119.6172600 | 2058 | na | na | 119 | 2016 | VanGunst Unpublished                                     |
| JVG-46 | High Rock            | Washoe County | NV | 41.5338524  | -119.6171900 | 2055 | na | na | 129 | 2016 | VanGunst Unpublished                                     |
| JVG-47 | High Rock            | Washoe County | NV | 41.5338404  | -119.6171800 | 2055 | na | na | 129 | 2016 | VanGunst Unpublished                                     |
| JVG-48 | High Rock            | Washoe County | NV | 41.5338479  | -119.6172100 | 2055 | na | na | 129 | 2016 | VanGunst Unpublished                                     |
| JVG-49 | High Rock            | Washoe County | NV | 41.5338574  | -119.6172300 | 2058 | na | na | 119 | 2016 | VanGunst Unpublished                                     |
| JVG-50 | High Rock            | Washoe County | NV | 41.5340335  | -119.6173900 | 2060 | na | na | 123 | 2016 | VanGunst Unpublished                                     |
| JVG-51 | High Rock            | Washoe County | NV | 41.5340257  | -119.6173700 | 2060 | na | na | 123 | 2016 | VanGunst Unpublished                                     |
| JVG-52 | High Rock            | Washoe County | NV | 41.5341586  | -119.6174800 | 2060 | na | na | 123 | 2016 | VanGunst Unpublished                                     |
| JVG-53 | High Rock            | Washoe County | NV | 41.5343074  | -119.6174900 | 2062 | na | na | 135 | 2016 | VanGunst Unpublished                                     |
| JVG-54 | High Rock            | Washoe County | NV | 41.5343343  | -119.6175100 | 2065 | na | na | 124 | 2016 | VanGunst Unpublished                                     |
| JVG-55 | High Rock            | Washoe County | NV | 41.5343412  | -119.6175200 | 2065 | na | na | 124 | 2016 | VanGunst Unpublished                                     |
| JWE1   | Warner Mountains     | S Jess Valley | CA | 41.2013400  | -120.2657800 | 2022 | na | na | 352 | 2016 | Ewanyk Unpublished                                       |
| KH001  | Wasatch Range        | na            | UT | 40.56830954 | -111.6231442 | 3134 | na | na | 20  | 2006 | Unpublished Utah State Monitoring Data (accessed 120516) |
| KH002  | Markagunt Plateau    | Kolob Terrace | UT | 37.56327065 | -113.0622761 | 2890 | na | na | 23  | 2008 | Unpublished Utah State Monitoring Data (accessed 120516) |
| KH004  | Wasatch Range        | na            | UT | 40.27705084 | -111.5456162 | 2890 |    |    | 25  | 2008 | Unpublished Utah State Monitoring Data (accessed 120516) |
| KH005  | Wasatch Range        | na            | UT | 40.59036255 | -111.5924345 | 2960 |    |    | 145 | 2008 | Unpublished Utah State Monitoring Data (accessed 120516) |
| KH006  | Wasatch Range        | na            | UT | 40.47731076 | -111.683673  | 2849 |    |    | 21  | 2008 | Unpublished Utah State Monitoring Data (accessed 120516) |
| KH008  | Uinta Mountains      | na            | UT | 40.7013739  | -110.8971706 | 3187 |    |    | 78  | 2008 | Unpublished Utah State Monitoring Data (accessed 120516) |
| KH011  | Wasatch Plateau      | na            | UT | 39.17048644 | -111.537832  | 3232 |    |    | 294 | 2008 | Unpublished Utah State Monitoring Data (accessed 120516) |
| KH012  | Fish Lake Plateau    | na            | UT | 38.71487279 | -111.6511029 | 3452 |    |    | 299 | 2008 | Unpublished Utah State Monitoring Data (accessed 120516) |
| KH014  | Fish Lake Plateau    | na            | UT | 38.7182864  | -111.6530433 | 3426 |    |    | 322 | 2008 | Unpublished Utah State Monitoring Data (accessed 120516) |
| KH016  | Wasatch Range        | na            | UT | 40.60870097 | -111.6052682 | 2985 |    |    | 28  | 2008 | Unpublished Utah State Monitoring Data (accessed 120516) |
| KH017  | Wasatch Range        | na            | UT | 40.57132711 | -111.6347973 | 3080 |    |    | 346 | 2008 | Unpublished Utah State Monitoring Data (accessed 120516) |
| KH019  | Wasatch Range        | na            | UT | 40.6029333  | -111.6892301 | 2783 |    |    | 351 | 2008 | Unpublished Utah State Monitoring Data (accessed 120516) |
| KH020  | Wasatch Range        | na            | UT | 40.54397112 | -111.7055715 | 3003 |    |    | 46  | 2008 | Unpublished Utah State Monitoring Data (accessed 120516) |
| KH021  | Wasatch Range        | na            | UT | 40.39301685 | -111.6389523 | 3171 |    |    | 319 | 2008 | Unpublished Utah State Monitoring Data (accessed 120516) |
| KH022  | Wasatch Range        | na            | UT | 40.54067341 | -111.6862062 | 3126 |    |    | 259 | 2008 | Unpublished Utah State Monitoring Data (accessed 120516) |
| KH023  | Wasatch Range        | na            | UT | 40.53680542 | -111.6882567 | 3107 |    |    | 220 | 2008 | Unpublished Utah State Monitoring Data (accessed 120516) |
| KH024  | Wasatch Range        | na            | UT | 40.66444569 | -111.7157361 | 2660 |    |    | 41  | 2008 | Unpublished Utah State Monitoring Data (accessed 120516) |
| KH025  | Wasatch Range        | na            | UT | 40.53997403 | -111.7006645 | 3079 |    |    | 310 | 2008 | Unpublished Utah State Monitoring Data (accessed 120516) |
| KH026  | Wasatch Range        | na            | UT | 40.60555236 | -111.7148356 | 2628 |    |    | 317 | 2008 | Unpublished Utah State Monitoring Data (accessed 120516) |
| KH027  | Wasatch Range        | na            | UT | 40.55253596 | -111.6475526 | 3243 |    |    | 71  | 2008 | Unpublished Utah State Monitoring Data (accessed 120516) |
| KH028  | Uinta Mountains      | na            | UT | 40.70891657 | -110.8367118 | 3228 |    |    | 222 | 2008 | Unpublished Utah State Monitoring Data (accessed 120516) |
| KH033  | Uinta Mountains      | na            | UT | 40.68731205 | -111.0003311 | 3201 |    |    | 175 | 2008 | Unpublished Utah State Monitoring Data (accessed 120516) |
| KH034  | Uinta Mountains      | na            | UT | 40.5774287  | -110.9744906 | 3040 |    |    | 30  | 2008 | Unpublished Utah State Monitoring Data (accessed 120516) |
| KH035  | Uinta Mountains      | na            | UT | 40.79516561 | -110.7685312 | 3433 |    |    | 14  | 2008 | Unpublished Utah State Monitoring Data (accessed 120516) |
| KH036  | Uinta Mountains      | na            | UT | 40.81415926 | -110.9466781 | 3200 |    |    | 315 | 2008 | Unpublished Utah State Monitoring Data (accessed 120516) |
| KH037  | Uinta Mountains      | na            | UT | 40.7716315  | -110.6262523 | 3650 |    |    | 225 | 2008 | Unpublished Utah State Monitoring Data (accessed 120516) |
| KH038  | Uinta Mountains      | na            | UT | 40.76606478 | -110.6074324 | 3440 |    |    | 16  | 2008 | Unpublished Utah State Monitoring Data (accessed 120516) |
| KH045  | Wasatch Plateau      | na            | UT | 39.00643904 | -111.4574626 | 3256 |    |    | 147 | 2008 | Unpublished Utah State Monitoring Data (accessed 120516) |
| KH048  | Bear River Mountains | na            | UT | 41.98049361 | -111.6646448 | 2612 | na | na | 336 | 2008 | Unpublished Utah State Monitoring Data (accessed 120516) |
| KH049  | Bear River Mountains | na            | UT | 41.9757676  | -111.6605007 | 2955 | na | na | 93  | 2009 | Unpublished Utah State Monitoring Data (accessed 120516) |
| KH050  | Bear River Mountains | na            | UT | 41.97556483 | -111.6597382 | 2922 | na | na | 133 | 2009 | Unpublished Utah State Monitoring Data (accessed 120516) |
| KH052  | Bear River Mountains | na            | UT | 41.96600394 | -111.659012  | 2916 | na | na | 90  | 2009 | Unpublished Utah State Monitoring Data (accessed 120516) |
| KH056  | Markagunt Plateau    | na            | UT | 37.52972341 | -112.7260818 | 2795 |    |    | 150 | 2011 | Unpublished Utah State Monitoring Data (accessed 120516) |
| KH057  | Markagunt Plateau    | na            | UT | 37.66118459 | -112.649516  | 2598 | na | na | 197 | 2009 | Unpublished Utah State Monitoring Data (accessed 120516) |
| KH059  | Sevier Plateau       | Monroe        | UT | 38.58759073 | -111.9490077 | 3124 | na | na | 161 | 2011 | Unpublished Utah State Monitoring Data (accessed 120516) |

|       |                      |        |    |             |              |      |    |    |     |      |                                                          |
|-------|----------------------|--------|----|-------------|--------------|------|----|----|-----|------|----------------------------------------------------------|
| KH061 | Sevier Plateau       | Monroe | UT | 38.61116115 | -111.9971896 | 3274 | na | na | 152 | 2011 | Unpublished Utah State Monitoring Data (accessed 120516) |
| KH062 | Sevier Plateau       | Monroe | UT | 38.62828992 | -112.0256074 | 3276 | na | na | 221 | 2011 | Unpublished Utah State Monitoring Data (accessed 120516) |
| KH064 | Wasatch Range        | na     | UT | 40.6612131  | -111.7037652 | 2842 | na | na | 4   | 2011 | Unpublished Utah State Monitoring Data (accessed 120516) |
| KH065 | Wasatch Range        | na     | UT | 40.59383254 | -111.6834876 | 3160 | na | na | 285 | 2011 | Unpublished Utah State Monitoring Data (accessed 120516) |
| KH067 | Wasatch Plateau      | na     | UT | 39.12707062 | -111.4801885 | 3182 | na | na | 264 | 2011 | Unpublished Utah State Monitoring Data (accessed 120516) |
| KH069 | Uinta Mountains      | na     | UT | 40.5213138  | -111.0925186 | 2410 | na | na | 53  | 2011 | Unpublished Utah State Monitoring Data (accessed 120516) |
| KH070 | Uinta Mountains      | na     | UT | 40.51611827 | -111.0765636 | 2392 | na | na | 15  | 2011 | Unpublished Utah State Monitoring Data (accessed 120516) |
| KH071 | Uinta Mountains      | na     | UT | 40.50656597 | -110.9841367 | 2897 | na | na | 168 | 2011 | Unpublished Utah State Monitoring Data (accessed 120516) |
| KH072 | Uinta Mountains      | na     | UT | 40.5044017  | -110.9728305 | 2786 | na | na | 72  | 2011 | Unpublished Utah State Monitoring Data (accessed 120516) |
| KH073 | Uinta Mountains      | na     | UT | 40.44692014 | -111.0759662 | 2561 | na | na | 329 | 2011 | Unpublished Utah State Monitoring Data (accessed 120516) |
| KH074 | Uinta Mountains      | na     | UT | 40.50978776 | -111.0721892 | 2463 | na | na | 138 | 2011 | Unpublished Utah State Monitoring Data (accessed 120516) |
| KH075 | Uinta Mountains      | na     | UT | 40.51008165 | -111.0428107 | 2604 | na | na | 225 | 2011 | Unpublished Utah State Monitoring Data (accessed 120516) |
| KH076 | Uinta Mountains      | na     | UT | 40.50904375 | -111.0135026 | 2793 | na | na | 358 | 2011 | Unpublished Utah State Monitoring Data (accessed 120516) |
| KH077 | Uinta Mountains      | na     | UT | 40.50997096 | -111.0186491 | 2772 | na | na | 10  | 2011 | Unpublished Utah State Monitoring Data (accessed 120516) |
| KH078 | Uinta Mountains      | na     | UT | 40.51815913 | -111.0826336 | 2377 | na | na | 31  | 2011 | Unpublished Utah State Monitoring Data (accessed 120516) |
| KH080 | Uinta Mountains      | na     | UT | 40.50975621 | -110.9969426 | 2939 | na | na | 222 | 2011 | Unpublished Utah State Monitoring Data (accessed 120516) |
| KH081 | Uinta Mountains      | na     | UT | 40.50026838 | -110.9821673 | 2775 | na | na | 58  | 2011 | Unpublished Utah State Monitoring Data (accessed 120516) |
| KH082 | Uinta Mountains      | na     | UT | 40.50230277 | -110.9735749 | 2785 | na | na | 114 | 2011 | Unpublished Utah State Monitoring Data (accessed 120516) |
| KH086 | Bear River Mountains | na     | UT | 41.96404689 | -111.6256725 | 2554 | na | na | 317 | 2011 | Unpublished Utah State Monitoring Data (accessed 120516) |
| KH089 | Bear River Mountains | na     | UT | 41.96348983 | -111.6320026 | 2572 | na | na | 27  | 2011 | Unpublished Utah State Monitoring Data (accessed 120516) |
| KH091 | Bear River Mountains | na     | UT | 41.92860657 | -111.6514023 | 2650 | na | na | 163 | 2011 | Unpublished Utah State Monitoring Data (accessed 120516) |
| KH092 | Uinta Mountains      | na     | UT | 40.74298222 | -110.7364952 | 3439 | na | na | 153 | 2011 | Unpublished Utah State Monitoring Data (accessed 120516) |
| KH094 | Uinta Mountains      | na     | UT | 40.81304118 | -110.9444973 | 3141 | na | na | 137 | 2011 | Unpublished Utah State Monitoring Data (accessed 120516) |
| KH095 | Uinta Mountains      | na     | UT | 40.77438244 | -110.6272797 | 3644 | na | na | 217 | 2011 | Unpublished Utah State Monitoring Data (accessed 120516) |
| KH096 | Uinta Mountains      | na     | UT | 40.79599218 | -110.7674259 | 3385 | na | na | 332 | 2011 | Unpublished Utah State Monitoring Data (accessed 120516) |
| KH097 | Uinta Mountains      | na     | UT | 40.70793969 | -110.8278    | 3631 | na | na | 219 | 2011 | Unpublished Utah State Monitoring Data (accessed 120516) |
| KH105 | Markagunt Plateau    | na     | UT | 37.56333076 | -113.064508  | 2906 | na | na | 359 | 2011 | Unpublished Utah State Monitoring Data (accessed 120516) |
| KH106 | Markagunt Plateau    | na     | UT | 37.54113728 | -112.6674892 | 2622 | na | na | 115 | 2011 | Unpublished Utah State Monitoring Data (accessed 120516) |
| KH107 | Markagunt Plateau    | na     | UT | 37.55734131 | -112.6865638 | 2717 | na | na | 72  | 2011 | Unpublished Utah State Monitoring Data (accessed 120516) |
| KH108 | Markagunt Plateau    | na     | UT | 37.68939319 | -112.65597   | 2622 | na | na | 268 | 2011 | Unpublished Utah State Monitoring Data (accessed 120516) |
| KH109 | Markagunt Plateau    | na     | UT | 37.69193394 | -112.8128422 | 3342 | na | na | 334 | 2011 | Unpublished Utah State Monitoring Data (accessed 120516) |
| KH110 | Tushar Mountains     | na     | UT | 38.23844821 | -112.3415198 | 3009 | na | na | 86  | 2011 | Unpublished Utah State Monitoring Data (accessed 120516) |
| KH111 | Tushar Mountains     | na     | UT | 38.20070094 | -112.3831161 | 3024 | na | na | 114 | 2011 | Unpublished Utah State Monitoring Data (accessed 120516) |
| KH113 | Tushar Mountains     | na     | UT | 38.39209776 | -112.4167663 | 3071 | na | na | 275 | 2011 | Unpublished Utah State Monitoring Data (accessed 120516) |
| KH115 | Tushar Mountains     | na     | UT | 38.47626172 | -112.4178735 | 2953 | na | na | 207 | 2011 | Unpublished Utah State Monitoring Data (accessed 120516) |
| KH118 | Wasatch Range        | na     | UT | 40.3930428  | -111.637515  | 3181 | na | na | 356 | 2011 | Unpublished Utah State Monitoring Data (accessed 120516) |
| KH121 | Wasatch Range        | na     | UT | 40.66444486 | -111.7173214 | 2713 | na | na | 41  | 2011 | Unpublished Utah State Monitoring Data (accessed 120516) |
| KH122 | Wasatch Range        | na     | UT | 40.50433594 | -111.6839473 | 2636 | na | na | 196 | 2011 | Unpublished Utah State Monitoring Data (accessed 120516) |
| KH123 | Wasatch Range        | na     | UT | 40.55018371 | -111.6493251 | 3346 | na | na | 161 | 2011 | Unpublished Utah State Monitoring Data (accessed 120516) |
| KH127 | Wasatch Range        | na     | UT | 40.53622204 | -111.6909075 | 3082 | na | na | 15  | 2011 | Unpublished Utah State Monitoring Data (accessed 120516) |
| KH128 | Wasatch Range        | na     | UT | 40.53939901 | -111.6838669 | 3224 | na | na | 241 | 2011 | Unpublished Utah State Monitoring Data (accessed 120516) |
| KH129 | Wasatch Plateau      | na     | UT | 38.99667229 | -111.4817194 | 3238 | na | na | 180 | 2011 | Unpublished Utah State Monitoring Data (accessed 120516) |
| KH131 | Uinta Mountains      | na     | UT | 40.746512   | -110.7357943 | 3486 | na | na | 337 | 2011 | Unpublished Utah State Monitoring Data (accessed 120516) |
| KH132 | Uinta Mountains      | na     | UT | 40.57962718 | -110.9759076 | 2959 | na | na | 26  | 2011 | Unpublished Utah State Monitoring Data (accessed 120516) |
| KH133 | Wasatch Range        | na     | UT | 40.56616918 | -111.6906129 | 2459 | na | na | 49  | 2011 | Unpublished Utah State Monitoring Data (accessed 120516) |
| KH134 | Wasatch Range        | na     | UT | 40.59903893 | -111.698657  | 2781 | na | na | 32  | 2011 | Unpublished Utah State Monitoring Data (accessed 120516) |
| KH135 | Wasatch Range        | na     | UT | 40.54416145 | -111.7053846 | 2999 | na | na | 35  | 2011 | Unpublished Utah State Monitoring Data (accessed 120516) |
| KH137 | Wasatch Range        | na     | UT | 40.53844419 | -111.7003888 | 3114 | na | na | 342 | 2011 | Unpublished Utah State Monitoring Data (accessed 120516) |
| KH138 | Wasatch Range        | na     | UT | 40.50902525 | -111.6982295 | 2743 | na | na | 178 | 2011 | Unpublished Utah State Monitoring Data (accessed 120516) |

|       |               |    |    |             |              |      |    |    |     |      |                                                          |
|-------|---------------|----|----|-------------|--------------|------|----|----|-----|------|----------------------------------------------------------|
| KH139 | Wasatch Range | na | UT | 40.53505965 | -111.6984407 | 3303 | na | na | 148 | 2011 | Unpublished Utah State Monitoring Data (accessed 120516) |
| KH140 | Wasatch Range | na | UT | 40.53373413 | -111.7016149 | 3322 | na | na | 334 | 2011 | Unpublished Utah State Monitoring Data (accessed 120516) |
| KH141 | Wasatch Range | na | UT | 40.53355229 | -111.7063242 | 3445 | na | na | 264 | 2011 | Unpublished Utah State Monitoring Data (accessed 120516) |
| KH143 | Wasatch Range | na | UT | 40.5456566  | -111.7039595 | 2971 | na | na | 271 | 2011 | Unpublished Utah State Monitoring Data (accessed 120516) |
| KH144 | Wasatch Range | na | UT | 40.54324607 | -111.7048082 | 3008 | na | na | 42  | 2011 | Unpublished Utah State Monitoring Data (accessed 120516) |
| KH146 | Wasatch Range | na | UT | 40.54411136 | -111.7062107 | 3026 | na | na | 43  | 2011 | Unpublished Utah State Monitoring Data (accessed 120516) |
| KH147 | Wasatch Range | na | UT | 40.54295481 | -111.702337  | 3034 | na | na | 281 | 2011 | Unpublished Utah State Monitoring Data (accessed 120516) |
| KH148 | Wasatch Range | na | UT | 40.54289386 | -111.700506  | 3088 | na | na | 255 | 2011 | Unpublished Utah State Monitoring Data (accessed 120516) |
| KH149 | Wasatch Range | na | UT | 40.53999098 | -111.6993539 | 3137 | na | na | 271 | 2011 | Unpublished Utah State Monitoring Data (accessed 120516) |
| KH150 | Wasatch Range | na | UT | 40.53888532 | -111.6989527 | 3148 | na | na | 268 | 2011 | Unpublished Utah State Monitoring Data (accessed 120516) |
| KH152 | Wasatch Range | na | UT | 40.53861814 | -111.6999301 | 3118 | na | na | 304 | 2011 | Unpublished Utah State Monitoring Data (accessed 120516) |
| KH153 | Wasatch Range | na | UT | 40.54238024 | -111.7005242 | 3082 | na | na | 246 | 2011 | Unpublished Utah State Monitoring Data (accessed 120516) |
| KH154 | Wasatch Range | na | UT | 40.5492571  | -111.6522923 | 3410 | na | na | 259 | 2011 | Unpublished Utah State Monitoring Data (accessed 120516) |
| KH155 | Wasatch Range | na | UT | 40.55197922 | -111.6568068 | 3469 | na | na | 333 | 2011 | Unpublished Utah State Monitoring Data (accessed 120516) |
| KH156 | Wasatch Range | na | UT | 40.54964343 | -111.6619804 | 3463 | na | na | 271 | 2011 | Unpublished Utah State Monitoring Data (accessed 120516) |
| KH157 | Wasatch Range | na | UT | 40.54899419 | -111.6652218 | 3272 | na | na | 260 | 2011 | Unpublished Utah State Monitoring Data (accessed 120516) |
| KH158 | Wasatch Range | na | UT | 40.54394131 | -111.6728124 | 3032 | na | na | 294 | 2011 | Unpublished Utah State Monitoring Data (accessed 120516) |
| KH159 | Wasatch Range | na | UT | 40.54541891 | -111.6758741 | 2937 | na | na | 332 | 2011 | Unpublished Utah State Monitoring Data (accessed 120516) |
| KH160 | Wasatch Range | na | UT | 40.53996141 | -111.6786296 | 3055 | na | na | 303 | 2011 | Unpublished Utah State Monitoring Data (accessed 120516) |
| KH161 | Wasatch Range | na | UT | 40.54026409 | -111.6792467 | 3043 | na | na | 323 | 2011 | Unpublished Utah State Monitoring Data (accessed 120516) |
| KH162 | Wasatch Range | na | UT | 40.53826674 | -111.6788015 | 3073 | na | na | 296 | 2011 | Unpublished Utah State Monitoring Data (accessed 120516) |
| KH163 | Wasatch Range | na | UT | 40.53707582 | -111.6760264 | 3143 | na | na | 273 | 2011 | Unpublished Utah State Monitoring Data (accessed 120516) |
| KH164 | Wasatch Range | na | UT | 40.53524433 | -111.6749453 | 3214 | na | na | 297 | 2011 | Unpublished Utah State Monitoring Data (accessed 120516) |
| KH165 | Wasatch Range | na | UT | 40.53288984 | -111.6754884 | 3295 | na | na | 148 | 2011 | Unpublished Utah State Monitoring Data (accessed 120516) |
| KH166 | Wasatch Range | na | UT | 40.53538469 | -111.6740493 | 3255 | na | na | 190 | 2011 | Unpublished Utah State Monitoring Data (accessed 120516) |
| KH167 | Wasatch Range | na | UT | 40.53844002 | -111.6707264 | 3355 | na | na | 215 | 2011 | Unpublished Utah State Monitoring Data (accessed 120516) |
| KH168 | Wasatch Range | na | UT | 40.53885844 | -111.6700338 | 3376 | na | na | 182 | 2011 | Unpublished Utah State Monitoring Data (accessed 120516) |
| KH169 | Wasatch Range | na | UT | 40.5402983  | -111.6671905 | 3400 | na | na | 27  | 2011 | Unpublished Utah State Monitoring Data (accessed 120516) |
| KH170 | Wasatch Range | na | UT | 40.54081135 | -111.6657077 | 3332 | na | na | 107 | 2011 | Unpublished Utah State Monitoring Data (accessed 120516) |
| KH171 | Wasatch Range | na | UT | 40.53988775 | -111.6789005 | 3050 | na | na | 298 | 2011 | Unpublished Utah State Monitoring Data (accessed 120516) |
| KH172 | Wasatch Range | na | UT | 40.5416741  | -111.6769228 | 3030 | na | na | 29  | 2011 | Unpublished Utah State Monitoring Data (accessed 120516) |
| KH174 | Wasatch Range | na | UT | 40.53739942 | -111.6853226 | 3126 | na | na | 286 | 2011 | Unpublished Utah State Monitoring Data (accessed 120516) |
| KH176 | Wasatch Range | na | UT | 40.53719009 | -111.6902208 | 3071 | na | na | 321 | 2011 | Unpublished Utah State Monitoring Data (accessed 120516) |
| KH177 | Wasatch Range | na | UT | 40.53669654 | -111.6929079 | 3092 | na | na | 10  | 2011 | Unpublished Utah State Monitoring Data (accessed 120516) |
| KH178 | Wasatch Range | na | UT | 40.53546978 | -111.6931669 | 3144 | na | na | 24  | 2011 | Unpublished Utah State Monitoring Data (accessed 120516) |
| KH179 | Wasatch Range | na | UT | 40.53058892 | -111.6852886 | 3346 | na | na | 238 | 2011 | Unpublished Utah State Monitoring Data (accessed 120516) |
| KH180 | Wasatch Range | na | UT | 40.53524682 | -111.6987732 | 3308 | na | na | 130 | 2011 | Unpublished Utah State Monitoring Data (accessed 120516) |
| KH181 | Wasatch Range | na | UT | 40.53354822 | -111.7025576 | 3309 | na | na | 180 | 2011 | Unpublished Utah State Monitoring Data (accessed 120516) |
| KH182 | Wasatch Range | na | UT | 40.5327035  | -111.71105   | 3331 | na | na | 6   | 2011 | Unpublished Utah State Monitoring Data (accessed 120516) |
| KH184 | Wasatch Range | na | UT | 40.56604968 | -111.6910133 | 2475 | na | na | 44  | 2011 | Unpublished Utah State Monitoring Data (accessed 120516) |
| KH185 | Wasatch Range | na | UT | 40.52780143 | -111.7621198 | 3210 | na | na | 185 | 2011 | Unpublished Utah State Monitoring Data (accessed 120516) |
| KH186 | Wasatch Range | na | UT | 40.52927133 | -111.7591612 | 3292 | na | na | 338 | 2011 | Unpublished Utah State Monitoring Data (accessed 120516) |
| KH187 | Wasatch Range | na | UT | 40.52719332 | -111.75595   | 3415 | na | na | 40  | 2011 | Unpublished Utah State Monitoring Data (accessed 120516) |
| KH188 | Wasatch Range | na | UT | 40.52679928 | -111.755914  | 3415 | na | na | 142 | 2011 | Unpublished Utah State Monitoring Data (accessed 120516) |
| KH189 | Wasatch Range | na | UT | 40.6070225  | -111.7232437 | 2771 | na | na | 79  | 2011 | Unpublished Utah State Monitoring Data (accessed 120516) |
| KH190 | Wasatch Range | na | UT | 40.59634859 | -111.7230105 | 3215 | na | na | 303 | 2011 | Unpublished Utah State Monitoring Data (accessed 120516) |
| KH191 | Wasatch Range | na | UT | 40.59357814 | -111.7223306 | 3415 | na | na | 156 | 2011 | Unpublished Utah State Monitoring Data (accessed 120516) |
| KH192 | Wasatch Range | na | UT | 40.59306584 | -111.7235778 | 3432 | na | na | 203 | 2011 | Unpublished Utah State Monitoring Data (accessed 120516) |
| KH193 | Wasatch Range | na | UT | 40.59374693 | -111.7212688 | 3435 | na | na | 246 | 2011 | Unpublished Utah State Monitoring Data (accessed 120516) |

|       |                   |        |    |             |              |      |    |    |     |      |                                                          |
|-------|-------------------|--------|----|-------------|--------------|------|----|----|-----|------|----------------------------------------------------------|
| KH194 | Wasatch Range     | na     | UT | 40.59018077 | -111.7152627 | 3328 | na | na | 216 | 2011 | Unpublished Utah State Monitoring Data (accessed 120516) |
| KH195 | Wasatch Range     | na     | UT | 40.59040927 | -111.7147334 | 3361 | na | na | 217 | 2011 | Unpublished Utah State Monitoring Data (accessed 120516) |
| KH196 | Wasatch Range     | na     | UT | 40.59105845 | -111.7117268 | 3413 | na | na | 223 | 2011 | Unpublished Utah State Monitoring Data (accessed 120516) |
| KH197 | Wasatch Range     | na     | UT | 40.5914083  | -111.7163394 | 3246 | na | na | 1   | 2011 | Unpublished Utah State Monitoring Data (accessed 120516) |
| KH198 | Wasatch Range     | na     | UT | 40.59950302 | -111.7126437 | 2888 | na | na | 232 | 2011 | Unpublished Utah State Monitoring Data (accessed 120516) |
| KH199 | Wasatch Range     | na     | UT | 40.60194375 | -111.7142062 | 2810 | na | na | 281 | 2011 | Unpublished Utah State Monitoring Data (accessed 120516) |
| KH200 | Wasatch Range     | na     | UT | 40.3857368  | -111.6439495 | 3507 | na | na | 183 | 2011 | Unpublished Utah State Monitoring Data (accessed 120516) |
| KH201 | Wasatch Range     | na     | UT | 40.4384389  | -111.6392524 | 2235 | na | na | 20  | 2011 | Unpublished Utah State Monitoring Data (accessed 120516) |
| KH202 | Wasatch Range     | na     | UT | 40.38448843 | -111.6367392 | 3549 | na | na | 300 | 2011 | Unpublished Utah State Monitoring Data (accessed 120516) |
| KH203 | Wasatch Range     | na     | UT | 40.39621644 | -111.6354357 | 3077 | na | na | 137 | 2011 | Unpublished Utah State Monitoring Data (accessed 120516) |
| KH204 | Wasatch Range     | na     | UT | 40.59218936 | -111.6671506 | 3362 | na | na | 204 | 2011 | Unpublished Utah State Monitoring Data (accessed 120516) |
| KH205 | Wasatch Range     | na     | UT | 40.59136366 | -111.6712785 | 3393 | na | na | 290 | 2011 | Unpublished Utah State Monitoring Data (accessed 120516) |
| KH206 | Wasatch Range     | na     | UT | 40.59840833 | -111.677483  | 3092 | na | na | 234 | 2011 | Unpublished Utah State Monitoring Data (accessed 120516) |
| KH207 | Wasatch Range     | na     | UT | 40.52037129 | -111.7535478 | 3077 | na | na | 175 | 2011 | Unpublished Utah State Monitoring Data (accessed 120516) |
| KH208 | Wasatch Range     | na     | UT | 40.52449477 | -111.7566989 | 3350 | na | na | 330 | 2011 | Unpublished Utah State Monitoring Data (accessed 120516) |
| KH209 | Wasatch Range     | na     | UT | 40.50878625 | -111.6900239 | 2933 | na | na | 145 | 2011 | Unpublished Utah State Monitoring Data (accessed 120516) |
| KH210 | Wasatch Range     | na     | UT | 40.50987688 | -111.6869072 | 2913 | na | na | 158 | 2011 | Unpublished Utah State Monitoring Data (accessed 120516) |
| KH211 | Wasatch Range     | na     | UT | 40.50889816 | -111.6833209 | 2863 | na | na | 205 | 2011 | Unpublished Utah State Monitoring Data (accessed 120516) |
| KH212 | Wasatch Range     | na     | UT | 40.5237328  | -111.7408235 | 3153 | na | na | 245 | 2011 | Unpublished Utah State Monitoring Data (accessed 120516) |
| KH213 | Wasatch Range     | na     | UT | 40.52592767 | -111.7385219 | 3193 | na | na | 120 | 2011 | Unpublished Utah State Monitoring Data (accessed 120516) |
| KH214 | Wasatch Range     | na     | UT | 40.53515629 | -111.73514   | 3340 | na | na | 140 | 2011 | Unpublished Utah State Monitoring Data (accessed 120516) |
| KH215 | Wasatch Range     | na     | UT | 40.54462923 | -111.7372393 | 3084 | na | na | 216 | 2011 | Unpublished Utah State Monitoring Data (accessed 120516) |
| KH216 | Wasatch Plateau   | na     | UT | 38.99668126 | -111.481731  | 3238 | na | na | 180 | 2011 | Unpublished Utah State Monitoring Data (accessed 120516) |
| KH217 | Wasatch Plateau   | na     | UT | 39.12559603 | -111.625772  | 2413 | na | na | 124 | 2014 | Unpublished Utah State Monitoring Data (accessed 120516) |
| KH218 | Wasatch Plateau   | na     | UT | 39.147821   | -111.4893675 | 3195 | na | na | 241 | 2014 | Unpublished Utah State Monitoring Data (accessed 120516) |
| KH220 | Wasatch Range     | na     | UT | 40.60564794 | -111.715404  | 2622 | na | na | 13  | 2014 | Unpublished Utah State Monitoring Data (accessed 120516) |
| KH221 | Uinta Mountains   | na     | UT | 40.70664035 | -110.832503  | 3346 | na | na | 234 | 2014 | Unpublished Utah State Monitoring Data (accessed 120516) |
| KH223 | Uinta Mountains   | na     | UT | 40.57733871 | -110.9749396 | 3044 | na | na | 17  | 2014 | Unpublished Utah State Monitoring Data (accessed 120516) |
| KH224 | Wasatch Plateau   | na     | UT | 39.12707958 | -111.4802001 | 3182 | na | na | 264 | 2014 | Unpublished Utah State Monitoring Data (accessed 120516) |
| KH226 | Wasatch Range     | na     | UT | 40.26586082 | -111.5476197 | 2873 | na | na | 293 | 2014 | Unpublished Utah State Monitoring Data (accessed 120516) |
| KH227 | Wasatch Plateau   | na     | UT | 39.03464042 | -111.5084588 | 3197 | na | na | 148 | 2014 | Unpublished Utah State Monitoring Data (accessed 120516) |
| KH228 | Wasatch Plateau   | na     | UT | 39.06862798 | -111.4879995 | 3194 | na | na | 169 | 2014 | Unpublished Utah State Monitoring Data (accessed 120516) |
| KH229 | Wasatch Plateau   | na     | UT | 39.06312032 | -111.5217243 | 3333 | na | na | 32  | 2014 | Unpublished Utah State Monitoring Data (accessed 120516) |
| KH231 | Wasatch Plateau   | na     | UT | 39.16991954 | -111.5258117 | 3247 | na | na | 353 | 2014 | Unpublished Utah State Monitoring Data (accessed 120516) |
| KH235 | Wasatch Range     | na     | UT | 40.53664912 | -111.6992837 | 3198 | na | na | 319 | 2014 | Unpublished Utah State Monitoring Data (accessed 120516) |
| KH237 | Wasatch Range     | na     | UT | 40.60811335 | -111.603939  | 2941 | na | na | 112 | 2014 | Unpublished Utah State Monitoring Data (accessed 120516) |
| KH241 | Fish Lake Plateau | na     | UT | 38.58548313 | -111.757228  | 3182 | na | na | 321 | 2014 | Unpublished Utah State Monitoring Data (accessed 120516) |
| KH244 | Fish Lake Plateau | na     | UT | 38.66951463 | -111.6450018 | 3300 | na | na | 297 | 2014 | Unpublished Utah State Monitoring Data (accessed 120516) |
| KH245 | Fish Lake Plateau | na     | UT | 38.70491604 | -111.657338  | 3268 | na | na | 281 | 2014 | Unpublished Utah State Monitoring Data (accessed 120516) |
| KH246 | Fish Lake Plateau | na     | UT | 38.74051798 | -111.5885914 | 3176 | na | na | 325 | 2014 | Unpublished Utah State Monitoring Data (accessed 120516) |
| KH247 | Fish Lake Plateau | na     | UT | 38.76652702 | -111.6750076 | 3060 | na | na | 20  | 2014 | Unpublished Utah State Monitoring Data (accessed 120516) |
| KH249 | Markagunt Plateau | na     | UT | 37.54153023 | -112.666468  | 2622 | na | na | 170 | 2014 | Unpublished Utah State Monitoring Data (accessed 120516) |
| KH252 | Markagunt Plateau | na     | UT | 37.6899611  | -112.650176  | 2627 | na | na | 51  | 2014 | Unpublished Utah State Monitoring Data (accessed 120516) |
| KH253 | Markagunt Plateau | na     | UT | 37.69194277 | -112.8128537 | 3342 | na | na | 334 | 2014 | Unpublished Utah State Monitoring Data (accessed 120516) |
| KH255 | Tushar Mountains  | na     | UT | 38.37224114 | -112.4170886 | 3291 | na | na | 116 | 2014 | Unpublished Utah State Monitoring Data (accessed 120516) |
| KH257 | Tushar Mountains  | na     | UT | 38.41422355 | -112.3803399 | 3248 | na | na | 313 | 2014 | Unpublished Utah State Monitoring Data (accessed 120516) |
| KH259 | Tushar Mountains  | na     | UT | 38.48977076 | -112.4118435 | 2974 | na | na | 10  | 2014 | Unpublished Utah State Monitoring Data (accessed 120516) |
| KH261 | Sevier Plateau    | Monroe | UT | 38.60657215 | -111.9542076 | 3204 | na | na | 60  | 2014 | Unpublished Utah State Monitoring Data (accessed 120516) |
| KH263 | Tushar Mountains  | na     | UT | 38.3924156  | -112.296669  | 2927 | na | na | 349 | 2014 | Unpublished Utah State Monitoring Data (accessed 120516) |

|            |                      |                     |    |             |              |      |    |    |     |      |                                                          |
|------------|----------------------|---------------------|----|-------------|--------------|------|----|----|-----|------|----------------------------------------------------------|
| KH264      | Bear River Mountains | na                  | UT | 41.96345407 | -111.631954  | 2572 | na | na | 27  | 2014 | Unpublished Utah State Monitoring Data (accessed 120516) |
| KH265      | Bear River Mountains | na                  | UT | 41.95262274 | -111.6197089 | 2692 | na | na | 32  | 2014 | Unpublished Utah State Monitoring Data (accessed 120516) |
| KH267      | Uinta Mountains      | na                  | UT | 40.77555715 | -110.6228411 | 3525 | na | na | 89  | 2014 | Unpublished Utah State Monitoring Data (accessed 120516) |
| KH269      | Markagunt Plateau    | na                  | UT | 37.53038033 | -112.7279981 | 2801 | na | na | 67  | 2014 | Unpublished Utah State Monitoring Data (accessed 120516) |
| KH270      | Markagunt Plateau    | na                  | UT | 37.53110864 | -112.7268833 | 2794 | na | na | 17  | 2014 | Unpublished Utah State Monitoring Data (accessed 120516) |
| KH271      | Markagunt Plateau    | na                  | UT | 37.54732621 | -112.7541181 | 2858 | na | na | 190 | 2014 | Unpublished Utah State Monitoring Data (accessed 120516) |
| KH272      | Markagunt Plateau    | na                  | UT | 37.54852207 | -112.7530934 | 2867 | na | na | 206 | 2014 | Unpublished Utah State Monitoring Data (accessed 120516) |
| KH273      | Markagunt Plateau    | na                  | UT | 37.66181454 | -112.647648  | 2610 | na | na | 156 | 2014 | Unpublished Utah State Monitoring Data (accessed 120516) |
| NDDB-046   | Fish Lake Plateau    | na                  | UT | 38.62842253 | -111.7305784 | 3208 | na | na | 326 | 2014 | Unpublished Utah State Monitoring Data (accessed 120516) |
| NDOW-1-001 | Sheldon Plateau      | Blowout Mountain    | NV | 41.7294590  | -119.2697735 | 2136 | na | na | 7   | 2009 | NDOW Unpublished, March, 2016                            |
| NDOW-1-002 | Sheldon Plateau      | Blowout Mountain    | NV | 41.7295685  | -119.2697053 | 2135 | na | na | 0   | 2009 | NDOW Unpublished, March, 2016                            |
| NDOW-1-003 | Sheldon Plateau      | Blowout Mountain    | NV | 41.7295628  | -119.2695367 | 2135 | na | na | 0   | 2009 | NDOW Unpublished, March, 2016                            |
| NDOW-1-004 | Sheldon Plateau      | Blowout Mountain    | NV | 41.7295931  | -119.2698264 | 2136 | na | na | 7   | 2009 | NDOW Unpublished, March, 2016                            |
| NDOW-1-033 | Sheldon Plateau      | Blowout Mountain    | NV | 41.7297587  | -119.2696518 | 2128 | na | na | 343 | 2009 | NDOW Unpublished, March, 2016                            |
| NDOW-1-035 | Sheldon Plateau      | Blowout Mountain    | NV | 41.7296237  | -119.2696471 | 2135 | na | na | 0   | 2009 | NDOW Unpublished, March, 2016                            |
| NDOW-1-038 | Sheldon Plateau      | Horse Canyon        | NV | 41.7756249  | -119.3494854 | 1848 | na | na | 282 | 2009 | NDOW Unpublished, March, 2016                            |
| NDOW-1-044 | Sheldon Plateau      | Horse Canyon        | NV | 41.7756281  | -119.3493291 | 1851 | na | na | 282 | 2009 | NDOW Unpublished, March, 2016                            |
| NDOW-1-045 | Sheldon Plateau      | Horse Canyon        | NV | 41.7756760  | -119.3491864 | 1851 | na | na | 282 | 2009 | NDOW Unpublished, March, 2016                            |
| NDOW-1-046 | Sheldon Plateau      | Horse Canyon        | NV | 41.7758144  | -119.3490230 | 1853 | na | na | 284 | 2009 | NDOW Unpublished, March, 2016                            |
| NDOW-1-049 | Sheldon Plateau      | Horse Canyon        | NV | 41.7757434  | -119.3489723 | 1853 | na | na | 284 | 2009 | NDOW Unpublished, March, 2016                            |
| NDOW-1-065 | Sheldon Plateau      | Horse Canyon        | NV | 41.7761635  | -119.3486869 | 1856 | na | na | 245 | 2009 | NDOW Unpublished, March, 2016                            |
| NDOW-1-069 | Shoshone Mountains   | North Shoshone Peak | NV | 39.1613128  | -117.4530482 | 2727 | na | na | 136 | 2010 | NDOW Unpublished, March, 2016                            |
| NDOW-1-070 | Shoshone Mountains   | North Shoshone Peak | NV | 39.1614016  | -117.4533844 | 2761 | na | na | 126 | 2010 | NDOW Unpublished, March, 2016                            |
| NDOW-1-071 | Shoshone Mountains   | North Shoshone Peak | NV | 39.1612750  | -117.4534878 | 2745 | na | na | 149 | 2010 | NDOW Unpublished, March, 2016                            |
| NDOW-1-072 | Shoshone Mountains   | na                  | NV | 39.1610138  | -117.4534629 | 2729 | na | na | 154 | 2010 | NDOW Unpublished, March, 2028                            |
| NDOW-1-073 | Shoshone Mountains   | North Shoshone Peak | NV | 39.1609870  | -117.4534049 | 2729 | na | na | 154 | 2010 | NDOW Unpublished, March, 2016                            |
| NDOW-1-074 | Shoshone Mountains   | North Shoshone Peak | NV | 39.1606967  | -117.4539123 | 2728 | na | na | 155 | 2010 | NDOW Unpublished, March, 2016                            |
| NDOW-1-075 | Shoshone Mountains   | North Shoshone Peak | NV | 39.1605794  | -117.4539347 | 2728 | na | na | 155 | 2010 | NDOW Unpublished, March, 2016                            |
| NDOW-1-076 | Shoshone Mountains   | North Shoshone Peak | NV | 39.1657787  | -117.4516415 | 2546 | na | na | 27  | 2010 | NDOW Unpublished, March, 2016                            |
| NDOW-1-086 | Shoshone Mountains   | North Shoshone Peak | NV | 39.1610405  | -117.4535441 | 2729 | na | na | 154 | 2010 | NDOW Unpublished, March, 2016                            |
| NDOW-1-087 | Shoshone Mountains   | North Shoshone Peak | NV | 39.1606426  | -117.4539004 | 2728 | na | na | 155 | 2010 | NDOW Unpublished, March, 2016                            |
| NDOW-1-088 | Shoshone Mountains   | North Shoshone Peak | NV | 39.1655616  | -117.4518600 | 2553 | na | na | 37  | 2010 | NDOW Unpublished, March, 2016                            |
| NDOW-1-089 | Shoshone Mountains   | North Shoshone Peak | NV | 39.1662203  | -117.4539594 | 2594 | na | na | 39  | 2010 | NDOW Unpublished, March, 2016                            |
| NDOW-1-090 | Shoshone Mountains   | North Shoshone Peak | NV | 39.1614470  | -117.4533037 | 2747 | na | na | 115 | 2010 | NDOW Unpublished, March, 2016                            |
| NDOW-1-091 | Shoshone Mountains   | na                  | NV | 39.16131278 | -117.4530482 | 2727 | na | na | 136 | 2010 | NDOW Unpublished, March, 2029                            |
| NDOW-1-092 | Shoshone Mountains   | na                  | NV | 39.16127502 | -117.4534878 | 2745 | na | na | 149 | 2010 | NDOW Unpublished, March, 2030                            |
| NDOW-1-093 | Shoshone Mountains   | North Shoshone Peak | NV | 39.1610138  | -117.4534629 | 2729 | na | na | 154 | 2010 | NDOW Unpublished, March, 2016                            |
| NDOW-1-094 | Shoshone Mountains   | na                  | NV | 39.16098699 | -117.4534049 | 2729 | na | na | 154 | 2010 | NDOW Unpublished, March, 2032                            |
| NDOW-1-095 | Shoshone Mountains   | na                  | NV | 39.16140158 | -117.4533844 | 2761 | na | na | 126 | 2010 | NDOW Unpublished, March, 2033                            |
| NDOW-1-096 | Shoshone Mountains   | na                  | NV | 39.16069666 | -117.4539123 | 2728 | na | na | 155 | 2010 | NDOW Unpublished, March, 2034                            |
| NDOW-1-097 | Shoshone Mountains   | na                  | NV | 39.16057943 | -117.4539347 | 2728 | na | na | 155 | 2010 | NDOW Unpublished, March, 2035                            |
| NDOW-1-098 | Shoshone Mountains   | na                  | NV | 39.16123002 | -117.4534759 | 2745 | na | na | 149 | 2010 | NDOW Unpublished, March, 2111                            |
| NDOW-1-099 | Shoshone Mountains   | na                  | NV | 39.1608781  | -117.453601  | 2729 | na | na | 154 | 2010 | NDOW Unpublished, March, 2112                            |
| NDOW-1-100 | Shoshone Mountains   | North Shoshone Peak | NV | 39.1606964  | -117.4539817 | 2728 | na | na | 155 | 2010 | NDOW Unpublished, March, 2016                            |
| NDOW-1-101 | Shoshone Mountains   | na                  | NV | 39.16042661 | -117.4538411 | 2705 | na | na | 160 | 2010 | NDOW Unpublished, March, 2113                            |
| NDOW-1-102 | Shoshone Mountains   | na                  | NV | 39.16031862 | -117.4538057 | 2705 | na | na | 160 | 2010 | NDOW Unpublished, March, 2114                            |
| NDOW-1-103 | Shoshone Mountains   | na                  | NV | 39.15991925 | -117.4545439 | 2687 | na | na | 165 | 2010 | NDOW Unpublished, March, 2115                            |
| NDOW-1-104 | Shoshone Mountains   | North Shoshone Peak | NV | 39.1599532  | -117.4550881 | 2689 | na | na | 188 | 2010 | NDOW Unpublished, March, 2016                            |
| NDOW-1-105 | Shoshone Mountains   | na                  | NV | 39.1658941  | -117.4544087 | 2605 | na | na | 32  | 2010 | NDOW Unpublished, March, 2116                            |

|            |                    |                     |    |             |              |      |    |    |     |      |                               |
|------------|--------------------|---------------------|----|-------------|--------------|------|----|----|-----|------|-------------------------------|
| NDOW-1-106 | Shoshone Mountains | North Shoshone Peak | NV | 39.1658489  | -117.4544432 | 2605 | na | na | 32  | 2010 | NDOW Unpublished, March, 2016 |
| NDOW-1-107 | Shoshone Mountains | na                  | NV | 39.16624724 | -117.4539711 | 2594 | na | na | 39  | 2010 | NDOW Unpublished, March, 2117 |
| NDOW-1-108 | Shoshone Mountains | na                  | NV | 39.16120411 | -117.4531864 | 2736 | na | na | 142 | 2010 | NDOW Unpublished, March, 2118 |
| NDOW-1-109 | Shoshone Mountains | na                  | NV | 39.16128521 | -117.4531869 | 2736 | na | na | 142 | 2010 | NDOW Unpublished, March, 2119 |
| NDOW-1-110 | Shoshone Mountains | North Shoshone Peak | NV | 39.1654061  | -117.4524493 | 2575 | na | na | 30  | 2010 | NDOW Unpublished, March, 2016 |
| NDOW-1-117 | Shoshone Mountains | North Shoshone Peak | NV | 39.1610225  | -117.4535440 | 2729 | na | na | 154 | 2010 | NDOW Unpublished, March, 2016 |
| NDOW-1-118 | Shoshone Mountains | na                  | NV | 39.16064264 | -117.4539004 | 2728 | na | na | 155 | 2010 | NDOW Unpublished, March, 2036 |
| NDOW-1-119 | Shoshone Mountains | na                  | NV | 39.16556159 | -117.45186   | 2553 | na | na | 37  | 2010 | NDOW Unpublished, March, 2037 |
| NDOW-1-120 | Shoshone Mountains | na                  | NV | 39.16622025 | -117.4539594 | 2594 | na | na | 39  | 2010 | NDOW Unpublished, March, 2038 |
| NDOW-1-121 | Shoshone Mountains | na                  | NV | 39.16144695 | -117.4533037 | 2747 | na | na | 115 | 2010 | NDOW Unpublished, March, 2039 |
| NDOW-1-122 | Massacre Rim       | na                  | NV | 41.7573017  | -119.6956859 | 1854 | na | na | 312 | 2010 | NDOW Unpublished, March, 2016 |
| NDOW-1-126 | Massacre Rim       | na                  | NV | 41.7548276  | -119.6940429 | 1929 | na | na | 320 | 2010 | NDOW Unpublished, March, 2016 |
| NDOW-1-127 | Massacre Rim       | na                  | NV | 41.75730166 | -119.6956859 | 1854 | na | na | 312 | 2010 | NDOW Unpublished, March, 2040 |
| NDOW-1-128 | Massacre Rim       | na                  | NV | 41.7562136  | -119.6952315 | 1872 | na | na | 302 | 2010 | NDOW Unpublished, March, 2016 |
| NDOW-1-129 | Massacre Rim       | na                  | NV | 41.75582617 | -119.6952393 | 1878 | na | na | 303 | 2010 | NDOW Unpublished, March, 2120 |
| NDOW-1-130 | Massacre Rim       | na                  | NV | 41.7576463  | -119.6925130 | 1869 | na | na | 340 | 2010 | NDOW Unpublished, March, 2016 |
| NDOW-1-131 | Massacre Rim       | na                  | NV | 41.7572806  | -119.6958174 | 1854 | na | na | 312 | 2010 | NDOW Unpublished, March, 2016 |
| NDOW-1-132 | Massacre Rim       | na                  | NV | 41.75735592 | -119.6956762 | 1854 | na | na | 312 | 2010 | NDOW Unpublished, March, 2121 |
| NDOW-1-133 | Massacre Rim       | na                  | NV | 41.7557702  | -119.6953211 | 1872 | na | na | 300 | 2010 | NDOW Unpublished, March, 2016 |
| NDOW-1-134 | Massacre Rim       | na                  | NV | 41.7554288  | -119.6914461 | 1944 | na | na | 325 | 2010 | NDOW Unpublished, March, 2016 |
| NDOW-1-139 | Massacre Rim       | na                  | NV | 41.7557545  | -119.6952243 | 1878 | na | na | 303 | 2010 | NDOW Unpublished, March, 2016 |
| NDOW-1-140 | Massacre Rim       | na                  | NV | 41.7806921  | -119.6569605 | 2021 | na | na | 300 | 2010 | NDOW Unpublished, March, 2016 |
| NDOW-1-142 | Monitor Range      | Table Mountain      | NV | 38.8224407  | -116.5930219 | 3267 | na | na | 35  | 2010 | NDOW Unpublished, March, 2016 |
| NDOW-1-143 | Monitor Range      | Table Mountain      | NV | 38.8142269  | -116.5892100 | 3172 | na | na | 40  | 2010 | NDOW Unpublished, March, 2016 |
| NDOW-1-144 | Monitor Range      | Table Mountain      | NV | 38.8144163  | -116.5892780 | 3172 | na | na | 40  | 2010 | NDOW Unpublished, March, 2016 |
| NDOW-1-145 | Monitor Range      | Table Mountain      | NV | 38.8144342  | -116.5892434 | 3172 | na | na | 40  | 2010 | NDOW Unpublished, March, 2016 |
| NDOW-1-146 | Monitor Range      | Table Mountain      | NV | 38.8145340  | -116.5894271 | 3163 | na | na | 45  | 2010 | NDOW Unpublished, March, 2016 |
| NDOW-1-147 | Monitor Range      | Table Mountain      | NV | 38.8228387  | -116.5934458 | 3266 | na | na | 47  | 2010 | NDOW Unpublished, March, 2016 |
| NDOW-1-148 | Monitor Range      | Table Mountain      | NV | 38.8139369  | -116.5887509 | 3163 | na | na | 33  | 2010 | NDOW Unpublished, March, 2016 |
| NDOW-1-154 | Monitor Range      | Table Mountain      | NV | 38.8110335  | -116.5857500 | 3285 | na | na | 18  | 2010 | NDOW Unpublished, March, 2016 |
| NDOW-1-155 | Monitor Range      | Table Mountain      | NV | 38.8222873  | -116.5929652 | 3267 | na | na | 35  | 2010 | NDOW Unpublished, March, 2016 |
| NDOW-1-156 | Monitor Range      | Table Mountain      | NV | 38.8225494  | -116.5931710 | 3266 | na | na | 43  | 2010 | NDOW Unpublished, March, 2016 |
| NDOW-1-161 | Monitor Range      | Table Mountain      | NV | 38.81103354 | -116.58575   | 3285 | na | na | 18  | 2010 | NDOW Unpublished, March, 2041 |
| NDOW-1-162 | Monitor Range      | Table Mountain      | NV | 38.82228735 | -116.5929652 | 3267 | na | na | 35  | 2010 | NDOW Unpublished, March, 2042 |
| NDOW-1-163 | Monitor Range      | Table Mountain      | NV | 38.8225494  | -116.593171  | 3266 | na | na | 43  | 2010 | NDOW Unpublished, March, 2043 |
| NDOW-1-164 | Monitor Range      | Table Mountain      | NV | 38.7898188  | -116.5853546 | 3271 | na | na | 30  | 2010 | NDOW Unpublished, March, 2016 |
| NDOW-1-166 | Monitor Range      | Table Mountain      | NV | 38.7705434  | -116.5829798 | 3213 | na | na | 56  | 2010 | NDOW Unpublished, March, 2016 |
| NDOW-1-167 | Monitor Range      | Table Mountain      | NV | 38.7704239  | -116.5823128 | 3182 | na | na | 29  | 2010 | NDOW Unpublished, March, 2016 |
| NDOW-1-171 | Monitor Range      | Table Mountain      | NV | 38.8378650  | -116.5920008 | 3194 | na | na | 3   | 2010 | NDOW Unpublished, March, 2016 |
| NDOW-1-172 | Monitor Range      | Table Mountain      | NV | 38.8379147  | -116.5907676 | 3186 | na | na | 19  | 2010 | NDOW Unpublished, March, 2016 |
| NDOW-1-173 | Monitor Range      | Table Mountain      | NV | 38.8281095  | -116.5957430 | 3251 | na | na | 35  | 2010 | NDOW Unpublished, March, 2016 |
| NDOW-1-192 | Sheldon Plateau    | West Gooch Table    | NV | 41.8446174  | -119.2813328 | 1904 | na | na | 312 | 2010 | NDOW Unpublished, March, 2016 |
| NDOW-1-195 | Ruby Mountains     | Mt Gilbert          | NV | 40.6269476  | -115.4374095 | 2719 | na | na | 64  | 2010 | NDOW Unpublished, March, 2016 |
| NDOW-1-197 | Ruby Mountains     | Liberty Pass        | NV | 40.5886870  | -115.3900300 | 3124 | na | na | 341 | 2010 | NDOW Unpublished, March, 2016 |
| NDOW-1-198 | Ruby Mountains     | Snowflake           | NV | 40.6003301  | -115.3903416 | 2947 | na | na | 141 | 2010 | NDOW Unpublished, March, 2016 |
| NDOW-1-199 | Ruby Mountains     | Lamoille Lake       | NV | 40.5908253  | -115.3948000 | 2993 | na | na | 354 | 2010 | NDOW Unpublished, March, 2016 |
| NDOW-1-200 | Ruby Mountains     | Dollar Lakes        | NV | 40.5909697  | -115.3851303 | 2939 | na | na | 11  | 2010 | NDOW Unpublished, March, 2016 |
| NDOW-1-201 | Ruby Mountains     | Hennen Canyon       | NV | 40.6402992  | -115.4875701 | 2651 | na | na | 313 | 2010 | NDOW Unpublished, March, 2016 |
| NDOW-1-202 | Ruby Mountains     | Griswold Lake       | NV | 40.6373987  | -115.4848330 | 2871 | na | na | 289 | 2010 | NDOW Unpublished, March, 2016 |

|            |                 |                     |    |             |              |      |    |    |     |      |                               |
|------------|-----------------|---------------------|----|-------------|--------------|------|----|----|-----|------|-------------------------------|
| NDOW-1-203 | Ruby Mountains  | Hennen Canyon       | NV | 40.6496064  | -115.5001216 | 2414 | na | na | 14  | 2010 | NDOW Unpublished, March, 2016 |
| NDOW-1-207 | Sheldon Plateau | Gooch Table         | NV | 41.8480319  | -119.2767325 | 1896 | na | na | 304 | 2009 | NDOW Unpublished, March, 2016 |
| NDOW-1-208 | Sheldon Plateau | Gooch Table         | NV | 41.8480793  | -119.2766137 | 1895 | na | na | 327 | 2009 | NDOW Unpublished, March, 2016 |
| NDOW-1-209 | Sheldon Plateau | Gooch Table         | NV | 41.8477975  | -119.2767483 | 1896 | na | na | 304 | 2009 | NDOW Unpublished, March, 2016 |
| NDOW-1-210 | Sheldon Plateau | Pruitt Canyon       | NV | 41.6856399  | -119.1132179 | 1995 | na | na | 217 | 2009 | NDOW Unpublished, March, 2016 |
| NDOW-1-211 | Sheldon Plateau | Blowout Mountain    | NV | 41.7174430  | -119.2707689 | 1970 | na | na | 187 | 2009 | NDOW Unpublished, March, 2016 |
| NDOW-1-212 | Sheldon Plateau | Blowout Mountain    | NV | 41.7244958  | -119.2689015 | 2021 | na | na | 68  | 2009 | NDOW Unpublished, March, 2016 |
| NDOW-1-213 | Sheldon Plateau | Blowout Mountain    | NV | 41.7226411  | -119.2675018 | 2028 | na | na | 236 | 2009 | NDOW Unpublished, March, 2016 |
| NDOW-1-214 | Sheldon Plateau | Blowout Mountain    | NV | 41.7259339  | -119.2695051 | 2038 | na | na | 192 | 2009 | NDOW Unpublished, March, 2016 |
| NDOW-1-215 | Sheldon Plateau | Blowout Mountain    | NV | 41.7263381  | -119.2709260 | 2048 | na | na | 163 | 2009 | NDOW Unpublished, March, 2016 |
| NDOW-1-216 | Sheldon Plateau | Blowout Mountain    | NV | 41.7254886  | -119.2692490 | 2025 | na | na | 181 | 2009 | NDOW Unpublished, March, 2016 |
| NDOW-1-217 | Sheldon Plateau | Blowout Mountain    | NV | 41.7254173  | -119.2701241 | 2035 | na | na | 57  | 2009 | NDOW Unpublished, March, 2016 |
| NDOW-1-218 | Sheldon Plateau | Fish Creek Spring   | NV | 41.7593205  | -119.3828582 | 1934 | na | na | 144 | 2009 | NDOW Unpublished, March, 2016 |
| NDOW-1-219 | Sheldon Plateau | Fish Creek Spring   | NV | 41.7575440  | -119.3890350 | 1939 | na | na | 135 | 2009 | NDOW Unpublished, March, 2016 |
| NDOW-1-220 | Sheldon Plateau | Fish Creek Spring   | NV | 41.7574818  | -119.3889966 | 1935 | na | na | 135 | 2009 | NDOW Unpublished, March, 2016 |
| NDOW-1-221 | Sheldon Plateau | Fish Creek Spring   | NV | 41.7583020  | -119.3872348 | 1938 | na | na | 175 | 2009 | NDOW Unpublished, March, 2016 |
| NDOW-1-222 | Sheldon Plateau | Fish Creek Spring   | NV | 41.7577928  | -119.3887676 | 1939 | na | na | 144 | 2009 | NDOW Unpublished, March, 2016 |
| NDOW-1-223 | Sheldon Plateau | Fish Creek Spring   | NV | 41.7591930  | -119.3829257 | 1934 | na | na | 144 | 2009 | NDOW Unpublished, March, 2016 |
| NDOW-1-224 | Sheldon Plateau | Fish Creek Spring   | NV | 41.7587374  | -119.3862166 | 1948 | na | na | 180 | 2009 | NDOW Unpublished, March, 2016 |
| NDOW-1-225 | Sheldon Plateau | Fish Creek Spring   | NV | 41.7587737  | -119.3862059 | 1948 | na | na | 180 | 2009 | NDOW Unpublished, March, 2016 |
| NDOW-1-226 | Sheldon Plateau | Fish Creek Spring   | NV | 41.7587712  | -119.3863261 | 1948 | na | na | 180 | 2009 | NDOW Unpublished, March, 2016 |
| NDOW-1-229 | Sheldon Plateau | Fish Creek Mountain | NV | 41.7506067  | -119.3467924 | 1989 | na | na | 342 | 2009 | NDOW Unpublished, March, 2016 |
| NDOW-1-230 | Sheldon Plateau | Fish Creek Mountain | NV | 41.7498902  | -119.3452750 | 2022 | na | na | 30  | 2009 | NDOW Unpublished, March, 2016 |
| NDOW-1-231 | Sheldon Plateau | Fish Creek Mountain | NV | 41.7505323  | -119.3469100 | 1997 | na | na | 334 | 2009 | NDOW Unpublished, March, 2016 |
| NDOW-1-232 | Sheldon Plateau | Fish Creek Mountain | NV | 41.7512178  | -119.3477407 | 1976 | na | na | 37  | 2009 | NDOW Unpublished, March, 2016 |
| NDOW-1-233 | Sheldon Plateau | Mahogany Butte      | NV | 41.6155990  | -119.2112036 | 2060 | na | na | 56  | 2009 | NDOW Unpublished, March, 2016 |
| NDOW-1-234 | Sheldon Plateau | Fish Creek Mountain | NV | 41.7504552  | -119.3467147 | 1997 | na | na | 334 | 2009 | NDOW Unpublished, March, 2016 |
| NDOW-1-235 | Sheldon Plateau | Fish Creek Mountain | NV | 41.7501573  | -119.3463070 | 2015 | na | na | 338 | 2009 | NDOW Unpublished, March, 2016 |
| NDOW-1-236 | Sheldon Plateau | Fish Creek Mountain | NV | 41.7504010  | -119.3467248 | 1997 | na | na | 334 | 2009 | NDOW Unpublished, March, 2016 |
| NDOW-1-237 | Sheldon Plateau | Fish Creek Mountain | NV | 41.7498535  | -119.3453097 | 2025 | na | na | 21  | 2009 | NDOW Unpublished, March, 2016 |
| NDOW-1-238 | Sheldon Plateau | Fish Creek Mountain | NV | 41.7510483  | -119.3476624 | 1979 | na | na | 9   | 2009 | NDOW Unpublished, March, 2016 |
| NDOW-1-267 | Ruby Mountains  | Liberty Pass        | NV | 40.5888194  | -115.3943635 | 3159 | na | na | 15  | 2008 | NDOW Unpublished, March, 2016 |
| NDOW-1-268 | Ruby Mountains  | Thomas Peak         | NV | 40.6250300  | -115.3793326 | 3055 | na | na | 20  | 2008 | NDOW Unpublished, March, 2016 |
| NDOW-1-269 | Ruby Mountains  | Chimney Rock        | NV | 41.0204023  | -115.0929449 | 2807 | na | na | 111 | 2010 | NDOW Unpublished, March, 2016 |
| NDOW-1-270 | Ruby Mountains  | Chimney Rock        | NV | 41.0177839  | -115.0909393 | 2802 | na | na | 37  | 2010 | NDOW Unpublished, March, 2016 |
| NDOW-1-271 | Ruby Mountains  | Lizzy Basin         | NV | 40.9338117  | -115.1021726 | 2618 | na | na | 335 | 2010 | NDOW Unpublished, March, 2016 |
| NDOW-1-278 | Ruby Mountains  | Pearl Peak          | NV | 40.2317314  | -115.5366169 | 3204 | na | na | 110 | 2008 | NDOW Unpublished, March, 2016 |
| NDOW-1-283 | Ruby Mountains  | Liberty Pass        | NV | 40.5874193  | -115.3915020 | 3179 | na | na | 354 | 2010 | NDOW Unpublished, March, 2016 |
| NDOW-1-288 | Ruby Mountains  | Ruby Dome           | NV | 40.6216665  | -115.4783907 | 3355 | na | na | 249 | 2011 | NDOW Unpublished, March, 2016 |
| NDOW-1-292 | Ruby Mountains  | Ruby Dome           | NV | 40.6213027  | -115.4753961 | 3436 | na | na | 146 | 2005 | NDOW Unpublished, March, 2016 |
| NDOW-1-294 | Ruby Mountains  | Ruby Dome           | NV | 40.6222925  | -115.4725835 | 3334 | na | na | 28  | 2010 | NDOW Unpublished, March, 2016 |
| NDOW-1-296 | Ruby Mountains  | Swartzwald          | NV | 40.5943256  | -115.3777582 | 2896 | na | na | 341 | 2009 | NDOW Unpublished, March, 2016 |
| NDOW-1-298 | Ruby Mountains  | Snowflake           | NV | 40.5978426  | -115.3921976 | 2958 | na | na | 102 | 2009 | NDOW Unpublished, March, 2016 |
| NDOW-1-299 | Ruby Mountains  | Pika Gulch          | NV | 40.5894922  | -115.3915705 | 3081 | na | na | 290 | 2009 | NDOW Unpublished, March, 2016 |
| NDOW-1-306 | Ruby Mountains  | Liberty Pass        | NV | 40.5858716  | -115.3929216 | 3195 | na | na | 201 | 2009 | NDOW Unpublished, March, 2016 |
| NDOW-1-309 | Ruby Mountains  | Snow Lake Peak      | NV | 40.6064258  | -115.3953132 | 3240 | na | na | 323 | 2008 | NDOW Unpublished, March, 2016 |
| NDOW-1-310 | Sheldon Plateau | Catnip Mountain     | NV | 41.9038691  | -119.4566910 | 1831 | na | na | 14  | 2009 | NDOW Unpublished, March, 2016 |
| NDOW-1-324 | Sheldon Plateau | Fish Creek          | NV | 41.7906428  | -119.3859440 | 1824 | na | na | 17  | 2009 | NDOW Unpublished, March, 2016 |
| NDOW-1-325 | Sheldon Plateau | Fish Creek          | NV | 41.79067029 | -119.3859209 | 1824 | na | na | 17  | 2009 | NDOW Unpublished, March, 2054 |

|            |                 |                     |    |             |              |      |    |    |     |      |                               |
|------------|-----------------|---------------------|----|-------------|--------------|------|----|----|-----|------|-------------------------------|
| NDOW-1-326 | Sheldon Plateau | Fish Creek          | NV | 41.7902546  | -119.3851233 | 1823 | na | na | 59  | 2009 | NDOW Unpublished, March, 2016 |
| NDOW-1-327 | Sheldon Plateau | Fish Creek          | NV | 41.7899571  | -119.3838367 | 1813 | na | na | 349 | 2009 | NDOW Unpublished, March, 2016 |
| NDOW-1-328 | Sheldon Plateau | Fish Creek          | NV | 41.7898766  | -119.3833764 | 1814 | na | na | 349 | 2009 | NDOW Unpublished, March, 2016 |
| NDOW-1-329 | Sheldon Plateau | Fish Creek          | NV | 41.7915044  | -119.3826184 | 1828 | na | na | 194 | 2009 | NDOW Unpublished, March, 2016 |
| NDOW-1-330 | Sheldon Plateau | Fish Creek          | NV | 41.7915204  | -119.3822820 | 1829 | na | na | 198 | 2009 | NDOW Unpublished, March, 2016 |
| NDOW-1-338 | Sheldon Plateau | Fish Creek          | NV | 41.7903311  | -119.3853427 | 1824 | na | na | 38  | 2009 | NDOW Unpublished, March, 2016 |
| NDOW-1-340 | Sheldon Plateau | Fish Creek          | NV | 41.7908715  | -119.3862052 | 1821 | na | na | 24  | 2009 | NDOW Unpublished, March, 2016 |
| NDOW-1-343 | Sheldon Plateau | Gooch Table         | NV | 41.84803194 | -119.2767325 | 1896 | na | na | 304 | 2009 | NDOW Unpublished, March, 2058 |
| NDOW-1-344 | Sheldon Plateau | Gooch Table         | NV | 41.84807932 | -119.2766137 | 1895 | na | na | 327 | 2009 | NDOW Unpublished, March, 2059 |
| NDOW-1-345 | Sheldon Plateau | Gooch Table         | NV | 41.84779747 | -119.2767483 | 1896 | na | na | 304 | 2009 | NDOW Unpublished, March, 2060 |
| NDOW-1-348 | Sheldon Plateau | Pruitt Canyon       | NV | 41.6856399  | -119.1132179 | 1995 | na | na | 217 | 2009 | NDOW Unpublished, March, 2061 |
| NDOW-1-349 | Sheldon Plateau | Blowout Mountain    | NV | 41.71744299 | -119.2707689 | 1970 | na | na | 187 | 2009 | NDOW Unpublished, March, 2062 |
| NDOW-1-350 | Sheldon Plateau | Blowout Caldera     | NV | 41.7244958  | -119.2689015 | 2021 | na | na | 68  | 2009 | NDOW Unpublished, March, 2063 |
| NDOW-1-366 | Sheldon Plateau | Blowout Caldera     | NV | 41.72264113 | -119.2675018 | 2028 | na | na | 236 | 2009 | NDOW Unpublished, March, 2064 |
| NDOW-1-367 | Sheldon Plateau | Blowout Caldera     | NV | 41.72593388 | -119.2695051 | 2038 | na | na | 192 | 2009 | NDOW Unpublished, March, 2065 |
| NDOW-1-368 | Sheldon Plateau | Blowout Caldera     | NV | 41.7263381  | -119.270926  | 2048 | na | na | 163 | 2009 | NDOW Unpublished, March, 2066 |
| NDOW-1-369 | Sheldon Plateau | Blowout Caldera     | NV | 41.72548863 | -119.269249  | 2025 | na | na | 181 | 2009 | NDOW Unpublished, March, 2067 |
| NDOW-1-370 | Sheldon Plateau | Blowout Caldera     | NV | 41.7254173  | -119.2701241 | 2035 | na | na | 57  | 2009 | NDOW Unpublished, March, 2068 |
| NDOW-1-371 | Sheldon Plateau | Fish Creek Spring   | NV | 41.75932049 | -119.3828582 | 1934 | na | na | 144 | 2009 | NDOW Unpublished, March, 2069 |
| NDOW-1-372 | Sheldon Plateau | Fish Creek Spring   | NV | 41.75754403 | -119.389035  | 1939 | na | na | 135 | 2009 | NDOW Unpublished, March, 2070 |
| NDOW-1-373 | Sheldon Plateau | Fish Creek Spring   | NV | 41.75748178 | -119.3889966 | 1935 | na | na | 135 | 2009 | NDOW Unpublished, March, 2071 |
| NDOW-1-374 | Sheldon Plateau | Fish Creek Spring   | NV | 41.75830196 | -119.3872348 | 1938 | na | na | 175 | 2009 | NDOW Unpublished, March, 2072 |
| NDOW-1-375 | Sheldon Plateau | Fish Creek Spring   | NV | 41.75779276 | -119.3887676 | 1939 | na | na | 144 | 2009 | NDOW Unpublished, March, 2073 |
| NDOW-1-376 | Sheldon Plateau | Fish Creek Spring   | NV | 41.75919301 | -119.3829257 | 1934 | na | na | 144 | 2009 | NDOW Unpublished, March, 2074 |
| NDOW-1-378 | Sheldon Plateau | Fish Creek Spring   | NV | 41.7587374  | -119.3862166 | 1948 | na | na | 180 | 2009 | NDOW Unpublished, March, 2075 |
| NDOW-1-379 | Sheldon Plateau | Fish Creek Spring   | NV | 41.75877365 | -119.3862059 | 1948 | na | na | 180 | 2009 | NDOW Unpublished, March, 2076 |
| NDOW-1-380 | Sheldon Plateau | Fish Creek Spring   | NV | 41.75877115 | -119.3863261 | 1948 | na | na | 180 | 2009 | NDOW Unpublished, March, 2077 |
| NDOW-1-385 | Sheldon Plateau | Fish Creek Mountain | NV | 41.75060673 | -119.3467924 | 1989 | na | na | 342 | 2009 | NDOW Unpublished, March, 2078 |
| NDOW-1-386 | Sheldon Plateau | Fish Creek Mountain | NV | 41.74989021 | -119.345275  | 2022 | na | na | 30  | 2009 | NDOW Unpublished, March, 2079 |
| NDOW-1-387 | Sheldon Plateau | Fish Creek Mountain | NV | 41.75053227 | -119.34691   | 1997 | na | na | 334 | 2009 | NDOW Unpublished, March, 2080 |
| NDOW-1-388 | Sheldon Plateau | Fish Creek Mountain | NV | 41.75121778 | -119.3477407 | 1976 | na | na | 37  | 2009 | NDOW Unpublished, March, 2081 |
| NDOW-1-389 | Sheldon Plateau | Mahogany Butte      | NV | 41.61559896 | -119.2112036 | 2060 | na | na | 56  | 2009 | NDOW Unpublished, March, 2082 |
| NDOW-1-390 | Sheldon Plateau | Fish Creek Mountain | NV | 41.75045521 | -119.3467147 | 1997 | na | na | 334 | 2009 | NDOW Unpublished, March, 2083 |
| NDOW-1-391 | Sheldon Plateau | Fish Creek Mountain | NV | 41.75015733 | -119.346307  | 2015 | na | na | 338 | 2009 | NDOW Unpublished, March, 2084 |
| NDOW-1-392 | Sheldon Plateau | Fish Creek Mountain | NV | 41.75040097 | -119.3467248 | 1997 | na | na | 334 | 2009 | NDOW Unpublished, March, 2085 |
| NDOW-1-393 | Sheldon Plateau | Fish Creek Mountain | NV | 41.74985348 | -119.3453097 | 2025 | na | na | 21  | 2009 | NDOW Unpublished, March, 2086 |
| NDOW-1-394 | Sheldon Plateau | Fish Creek Mountain | NV | 41.75104826 | -119.3476624 | 1979 | na | na | 9   | 2009 | NDOW Unpublished, March, 2087 |
| NDOW-1-395 | Sheldon Plateau | Horse Canyon        | NV | 41.7716421  | -119.3557402 | 1849 | na | na | 356 | 2009 | NDOW Unpublished, March, 2016 |
| NDOW-1-399 | Sheldon Plateau | Horse Canyon        | NV | 41.7734717  | -119.3547966 | 1851 | na | na | 135 | 2009 | NDOW Unpublished, March, 2016 |
| NDOW-1-400 | Sheldon Plateau | Horse Canyon        | NV | 41.7735948  | -119.3545003 | 1850 | na | na | 98  | 2009 | NDOW Unpublished, March, 2016 |
| NDOW-1-408 | Sheldon Plateau | Horse Canyon        | NV | 41.7723879  | -119.3536261 | 1856 | na | na | 291 | 2009 | NDOW Unpublished, March, 2016 |
| NDOW-1-409 | Sheldon Plateau | Horse Canyon        | NV | 41.7726483  | -119.3532265 | 1860 | na | na | 323 | 2009 | NDOW Unpublished, March, 2016 |
| NDOW-1-411 | Sheldon Plateau | Horse Canyon        | NV | 41.7726717  | -119.3529627 | 1861 | na | na | 335 | 2009 | NDOW Unpublished, March, 2016 |
| NDOW-1-412 | Sheldon Plateau | Horse Canyon        | NV | 41.7726722  | -119.3529387 | 1861 | na | na | 335 | 2009 | NDOW Unpublished, March, 2016 |
| NDOW-1-413 | Sheldon Plateau | Horse Canyon        | NV | 41.7733968  | -119.3518583 | 1851 | na | na | 351 | 2009 | NDOW Unpublished, March, 2016 |
| NDOW-1-414 | Sheldon Plateau | Horse Canyon        | NV | 41.7756351  | -119.3494256 | 1851 | na | na | 282 | 2009 | NDOW Unpublished, March, 2016 |
| NDOW-1-445 | Sheldon Plateau | Horse Canyon        | NV | 41.7716331  | -119.3557399 | 1849 | na | na | 356 | 2009 | NDOW Unpublished, March, 2016 |
| NDOW-1-448 | Sheldon Plateau | Horse Canyon        | NV | 41.7735006  | -119.3547014 | 1850 | na | na | 98  | 2009 | NDOW Unpublished, March, 2016 |
| NDOW-1-449 | Sheldon Plateau | Horse Canyon        | NV | 41.7755706  | -119.3494954 | 1848 | na | na | 282 | 2009 | NDOW Unpublished, March, 2016 |



|            |                     |                                                         |    |             |              |      |    |    |     |      |                               |
|------------|---------------------|---------------------------------------------------------|----|-------------|--------------|------|----|----|-----|------|-------------------------------|
| NDOW-1-450 | Sheldon Plateau     | Horse Canyon                                            | NV | 41.7755996  | -119.3494002 | 1851 | na | na | 282 | 2009 | NDOW Unpublished, March, 2016 |
| NDOW-1-451 | Sheldon Plateau     | Horse Canyon                                            | NV | 41.7756191  | -119.3493287 | 1851 | na | na | 282 | 2009 | NDOW Unpublished, March, 2016 |
| NDOW-1-459 | Sheldon Plateau     | Horse Canyon                                            | NV | 41.7716763  | -119.3558257 | 1847 | na | na | 345 | 2009 | NDOW Unpublished, March, 2016 |
| NDOW-1-461 | Sheldon Plateau     | Horse Canyon                                            | NV | 41.77167634 | -119.3558257 | 1847 | na | na | 345 | 2009 | NDOW Unpublished, March, 2109 |
| NDOW-2-043 | Ruby Mountains      | Liberty Lake                                            | NV | 40.5825016  | -115.3922106 | 3123 | na | na | 281 | 2005 | NDOW Unpublished, March, 2016 |
| NDOW-2-044 | Ruby Mountains      | na                                                      | NV | 40.5882032  | -115.3902189 | 3155 | na | na | 319 | 2005 | NDOW Unpublished, March, 2017 |
| NDOW-2-045 | Ruby Mountains      | na                                                      | NV | 40.5870017  | -115.3932136 | 3185 | na | na | 334 | 2005 | NDOW Unpublished, March, 2018 |
| NDOW-2-046 | Toquima Range       | na                                                      | NV | 38.7271054  | -116.9243136 | 2980 | na | na | 109 | 2005 | NDOW Unpublished, March, 2019 |
| NDOW-2-047 | Toiyabe Range       | Ophir Summit                                            | NV | 38.9503600  | -117.3197385 | 3061 | na | na | 314 | 2008 | NDOW Unpublished, March, 2020 |
| NDOW-2-115 | Sheldon Plateau     | Blowout Mountain                                        | NV | 41.7281333  | -119.2662163 | 2157 | na | na | 105 | 2009 | NDOW Unpublished, March, 2088 |
| NDOW-2-119 | Sheldon Plateau     | Blowout Mountain                                        | NV | 41.7298169  | -119.2698944 | 2128 | na | na | 358 | 2009 | NDOW Unpublished, March, 2092 |
| NDOW-2-120 | Sheldon Plateau     | Blowout Mountain                                        | NV | 41.7298624  | -119.2698719 | 2128 | na | na | 358 | 2009 | NDOW Unpublished, March, 2093 |
| NDOW-2-123 | Sheldon Plateau     | Blowout Mountain                                        | NV | 41.7297563  | -119.2697720 | 2128 | na | na | 358 | 2009 | NDOW Unpublished, March, 2096 |
| NDOW-2-125 | Sheldon Plateau     | Blowout Mountain                                        | NV | 41.7295602  | -119.2696689 | 2135 | na | na | 0   | 2009 | NDOW Unpublished, March, 2098 |
| NDOW-2-129 | Sheldon Plateau     | Blowout Mountain                                        | NV | 41.7297968  | -119.2695450 | 2128 | na | na | 343 | 2009 | NDOW Unpublished, March, 2102 |
| NDOW-2-130 | Sheldon Plateau     | Blowout Mountain                                        | NV | 41.7283578  | -119.2667051 | 2162 | na | na | 18  | 2009 | NDOW Unpublished, March, 2103 |
| NDOW-2-131 | Sheldon Plateau     | Blowout Mountain                                        | NV | 41.7283263  | -119.2664755 | 2162 | na | na | 91  | 2009 | NDOW Unpublished, March, 2104 |
| NDOW-2-132 | Sheldon Plateau     | Blowout Mountain                                        | NV | 41.7284343  | -119.2664793 | 2160 | na | na | 45  | 2009 | NDOW Unpublished, March, 2105 |
| NDOW-2-133 | Sheldon Plateau     | Blowout Mountain                                        | NV | 41.7283538  | -119.2664524 | 2160 | na | na | 45  | 2009 | NDOW Unpublished, March, 2106 |
| NDOW-2-134 | Sheldon Plateau     | Blowout Mountain                                        | NV | 41.7282027  | -119.2663509 | 2157 | na | na | 105 | 2009 | NDOW Unpublished, March, 2107 |
| NDOW-2-207 | Sheldon Plateau     | Fish Creek Mountain                                     | NV | 41.7498680  | -119.3454786 | 2025 | na | na | 21  | 2009 | NDOW Unpublished, March, 2180 |
| NDOW-2-210 | Sheldon Plateau     | Fish Creek Mountain                                     | NV | 41.7500594  | -119.3458103 | 2019 | na | na | 355 | 2009 | NDOW Unpublished, March, 2183 |
| NDOW-2-264 | Toiyabe Range       | Clear Creek                                             | NV | 38.9502431  | -117.3196803 | 3081 | na | na | 320 | 2010 | NDOW Unpublished, March, 2237 |
| NDOW-2-265 | Carson Range        | Snow Valley Peak - SVP-07                               | NV | 39.1535678  | -119.8749595 | 2743 | na | na | 319 | 2011 | NDOW Unpublished, March, 2238 |
| NDOW-2-266 | Carson Range        | Tamarack peak - TP-03                                   | NV | 39.3248152  | -119.9222692 | 2803 | na | na | 355 | 2011 | NDOW Unpublished, March, 2239 |
| NDOW-2-267 | Carson Range        | Tamarack Peak - TP-02                                   | NV | 39.3237382  | -119.9303432 | 2856 | na | na | 3   | 2011 | NDOW Unpublished, March, 2240 |
| NDOW-2-268 | Carson Range        | Mt Houghton - Mt Houghton                               | NV | 39.3303069  | -119.9313600 | 2893 | na | na | 142 | 2011 | NDOW Unpublished, March, 2241 |
| NDOW-2-269 | Carson Range        | Marlette peak - MP-03                                   | NV | 39.1972043  | -119.9109274 | 2599 | na | na | 159 | 2011 | NDOW Unpublished, March, 2242 |
| NDOW-2-270 | Carson Range        | Marlette Peak - MP-02                                   | NV | 39.1886798  | -119.8951212 | 2669 | na | na | 348 | 2011 | NDOW Unpublished, March, 2243 |
| NDOW-2-271 | Carson Range        | Marlette Peak - MP-01                                   | NV | 39.1870589  | -119.8958186 | 2641 | na | na | 194 | 2011 | NDOW Unpublished, March, 2244 |
| NDOW-2-272 | Carson Range        | Rose Knob - RK-01                                       | NV | 39.2937914  | -119.9582047 | 2947 | na | na | 335 | 2011 | NDOW Unpublished, March, 2245 |
| NDOW-2-273 | Carson Range        | Mount Houghton - MH-02                                  | NV | 39.3299188  | -119.9328169 | 2923 | na | na | 166 | 2011 | NDOW Unpublished, March, 2246 |
| NDOW-2-274 | Carson Range        | Mount Rose - MR-03                                      | NV | 39.3457460  | -119.9174447 | 3179 | na | na | 19  | 2011 | NDOW Unpublished, March, 2247 |
| NDOW-2-275 | Carson Range        | Mount Rose - MR-02                                      | NV | 39.3479282  | -119.9220257 | 3190 | na | na | 205 | 2011 | NDOW Unpublished, March, 2248 |
| NDOW-2-276 | Carson Range        | Mount Rose - MR-01, where Mt. Rose trail goes to saddle | NV | 39.3404150  | -119.9256107 | 2967 | na | na | 173 | 2011 | NDOW Unpublished, March, 2249 |
| NDOW-2-277 | Carson Range        | Mount Houghton - MH-03                                  | NV | 39.3317168  | -119.9247374 | 2787 | na | na | 136 | 2011 | NDOW Unpublished, March, 2250 |
| NDOW-2-278 | Carson Range        | Mount Rose - MR-04                                      | NV | 39.3405584  | -119.9191895 | 3058 | na | na | 199 | 2011 | NDOW Unpublished, March, 2251 |
| NDOW-2-279 | Carson Range        | Tamarack Peak - TP-04                                   | NV | 39.3231369  | -119.9238114 | 2856 | na | na | 301 | 2011 | NDOW Unpublished, March, 2252 |
| NDOW-2-280 | Carson Range        | Mt. Houghton - MH-04                                    | NV | 39.3366124  | -119.9310203 | 3037 | na | na | 17  | 2011 | NDOW Unpublished, March, 2253 |
| NDOW-2-318 | East Humboldt Range | na                                                      | NV | 40.9113963  | -115.1339108 | 3067 | na | na | 15  | 2013 | NDOW Unpublished, March, 2260 |
| NDOW-2-319 | Ruby Mountains      | na                                                      | NV | 40.7692536  | -115.2476569 | 2843 | na | na | 18  | 2013 | NDOW Unpublished, March, 2261 |
| NDOW-2-324 | East Humboldt Range | na                                                      | NV | 40.8881772  | -115.1486051 | 3030 | na | na | 352 | 2013 | NDOW Unpublished, March, 2266 |
| NDOW-3-001 | Hays Canyon Range   | Washoe County                                           | NV | 41.3348247  | -119.7870284 | 1924 | na | na | 351 | 2014 | NDOW Unpublished, March, 2016 |
| NDOW-3-002 | Hays Canyon Range   | Washoe County                                           | NV | 41.3347617  | -119.7870257 | 1925 | na | na | 351 | 2014 | NDOW Unpublished, March, 2016 |
| NDOW-3-003 | Hays Canyon Range   | Washoe County                                           | NV | 41.3344932  | -119.7873200 | 1926 | na | na | 18  | 2014 | Jeffress et al. 2017          |
| NDOW-3-005 | Hays Canyon Range   | Washoe County                                           | NV | 41.3340826  | -119.7875500 | 1933 | na | na | 21  | 2014 | Jeffress et al. 2017          |
| NDOW-3-006 | Hays Canyon Range   | Washoe County                                           | NV | 41.3340257  | -119.7872900 | 1933 | na | na | 339 | 2014 | Jeffress et al. 2017          |
| NDOW-3-007 | Hays Canyon Range   | Washoe County                                           | NV | 41.3337578  | -119.7875684 | 1937 | na | na | 0   | 2014 | NDOW Unpublished, March, 2016 |
| NDOW-3-009 | Hays Canyon Range   | Washoe County                                           | NV | 41.3333855  | -119.7876959 | 1941 | na | na | 345 | 2014 | NDOW Unpublished, March, 2016 |

|            |                   |               |    |            |              |      |    |    |     |      |                               |
|------------|-------------------|---------------|----|------------|--------------|------|----|----|-----|------|-------------------------------|
| NDOW-3-010 | Hays Canyon Range | Washoe County | NV | 41.3330230 | -119.7881584 | 1947 | na | na | 8   | 2014 | NDOW Unpublished, March, 2016 |
| NDOW-3-011 | Hays Canyon Range | Washoe County | NV | 41.3328431 | -119.7881507 | 1948 | na | na | 8   | 2014 | NDOW Unpublished, March, 2016 |
| NDOW-3-012 | Hays Canyon Range | Washoe County | NV | 41.3325790 | -119.7882709 | 1951 | na | na | 347 | 2014 | NDOW Unpublished, March, 2016 |
| NDOW-3-020 | Hays Canyon Range | Washoe County | NV | 41.3229273 | -119.8679900 | 2086 | na | na | 296 | 2014 | Jeffress et al. 2017          |
| NDOW-3-021 | Hays Canyon Range | Washoe County | NV | 41.3231207 | -119.8678200 | 2079 | na | na | 323 | 2014 | Jeffress et al. 2017          |
| NDOW-3-022 | Hays Canyon Range | Washoe County | NV | 41.3231558 | -119.8678544 | 2081 | na | na | 323 | 2014 | NDOW Unpublished, March, 2016 |
| NDOW-3-023 | Hays Canyon Range | Washoe County | NV | 41.3231384 | -119.8678297 | 2081 | na | na | 323 | 2014 | NDOW Unpublished, March, 2016 |
| NDOW-3-024 | Hays Canyon Range | Washoe County | NV | 41.3233396 | -119.8677071 | 2079 | na | na | 336 | 2014 | NDOW Unpublished, March, 2016 |
| NDOW-3-033 | Hays Canyon Range | Washoe County | NV | 41.3016126 | -119.8249200 | 2024 | na | na | 157 | 2014 | Jeffress et al. 2017          |
| NDOW-3-034 | Hays Canyon Range | Washoe County | NV | 41.3016033 | -119.8249292 | 2024 | na | na | 157 | 2014 | NDOW Unpublished, March, 2016 |
| NDOW-3-035 | Hays Canyon Range | Washoe County | NV | 41.3015934 | -119.8249646 | 2024 | na | na | 157 | 2014 | NDOW Unpublished, March, 2016 |
| NDOW-3-036 | Hays Canyon Range | Washoe County | NV | 41.3016096 | -119.8250370 | 2025 | na | na | 161 | 2014 | NDOW Unpublished, March, 2016 |
| NDOW-3-037 | Hays Canyon Range | Washoe County | NV | 41.3015823 | -119.8250500 | 2026 | na | na | 161 | 2014 | Jeffress et al. 2017          |
| NDOW-3-039 | Hays Canyon Range | Washoe County | NV | 41.3014949 | -119.8253067 | 2025 | na | na | 162 | 2014 | NDOW Unpublished, March, 2016 |
| NDOW-3-040 | Hays Canyon Range | Washoe County | NV | 41.3018473 | -119.8252622 | 2036 | na | na | 145 | 2014 | NDOW Unpublished, March, 2016 |
| NDOW-3-042 | Hays Canyon Range | Washoe County | NV | 41.3024047 | -119.7887600 | 2211 | na | na | 333 | 2014 | Jeffress et al. 2017          |
| NDOW-3-043 | Hays Canyon Range | Washoe County | NV | 41.3024494 | -119.7887800 | 2211 | na | na | 333 | 2014 | Jeffress et al. 2017          |
| NDOW-3-045 | Hays Canyon Range | Washoe County | NV | 41.3024045 | -119.7887757 | 2211 | na | na | 333 | 2014 | NDOW Unpublished, March, 2016 |
| NDOW-3-046 | Hays Canyon Range | Washoe County | NV | 41.3024683 | -119.7887426 | 2210 | na | na | 333 | 2014 | NDOW Unpublished, March, 2016 |
| NDOW-3-047 | Hays Canyon Range | Washoe County | NV | 41.2996424 | -119.8277600 | 2025 | na | na | 357 | 2014 | Jeffress et al. 2017          |
| NDOW-3-048 | Hays Canyon Range | Washoe County | NV | 41.2995980 | -119.8277328 | 2023 | na | na | 357 | 2014 | NDOW Unpublished, March, 2016 |
| NDOW-3-049 | Hays Canyon Range | Washoe County | NV | 41.2995998 | -119.8276612 | 2024 | na | na | 357 | 2014 | NDOW Unpublished, March, 2016 |
| NDOW-3-054 | Hays Canyon Range | Washoe County | NV | 41.2973872 | -119.8326649 | 2024 | na | na | 339 | 2014 | NDOW Unpublished, March, 2016 |
| NDOW-3-055 | Hays Canyon Range | Washoe County | NV | 41.2972822 | -119.8325410 | 2030 | na | na | 339 | 2014 | NDOW Unpublished, March, 2016 |
| NDOW-3-056 | Hays Canyon Range | Washoe County | NV | 41.2971994 | -119.8326090 | 2031 | na | na | 336 | 2014 | NDOW Unpublished, March, 2016 |
| NDOW-3-057 | Hays Canyon Range | Washoe County | NV | 41.2971475 | -119.8325232 | 2034 | na | na | 336 | 2014 | NDOW Unpublished, March, 2016 |
| NDOW-3-058 | Hays Canyon Range | Washoe County | NV | 41.2969072 | -119.8324053 | 2045 | na | na | 343 | 2014 | NDOW Unpublished, March, 2016 |
| NDOW-3-059 | Hays Canyon Range | Washoe County | NV | 41.2971110 | -119.8321753 | 2041 | na | na | 1   | 2014 | NDOW Unpublished, March, 2016 |
| NDOW-3-060 | Hays Canyon Range | Washoe County | NV | 41.2969205 | -119.8325970 | 2040 | na | na | 326 | 2014 | NDOW Unpublished, March, 2016 |
| NDOW-3-061 | Hays Canyon Range | Washoe County | NV | 41.2969211 | -119.8325731 | 2041 | na | na | 326 | 2014 | NDOW Unpublished, March, 2016 |
| NDOW-3-065 | Hays Canyon Range | Washoe County | NV | 41.3317052 | -119.8655900 | 2046 | na | na | 277 | 2014 | Jeffress et al. 2017          |
| NDOW-3-066 | Hays Canyon Range | Washoe County | NV | 41.3316875 | -119.8655762 | 2041 | na | na | 277 | 2014 | NDOW Unpublished, March, 2016 |
| NDOW-3-067 | Hays Canyon Range | Washoe County | NV | 41.3315456 | -119.8654864 | 2043 | na | na | 282 | 2014 | NDOW Unpublished, March, 2016 |
| NDOW-3-068 | Hays Canyon Range | Washoe County | NV | 41.3292236 | -119.8654204 | 2048 | na | na | 284 | 2014 | NDOW Unpublished, March, 2016 |
| NDOW-30-69 | Hays Canyon Range | Washoe County | NV | 41.3292521 | -119.8653619 | 2049 | na | na | 284 | 2014 | NDOW Unpublished, March, 2016 |
| NDOW-3-070 | Hays Canyon Range | Washoe County | NV | 41.3291975 | -119.8653834 | 2049 | na | na | 284 | 2014 | NDOW Unpublished, March, 2016 |
| NDOW-3-071 | Hays Canyon Range | Washoe County | NV | 41.3291697 | -119.8654180 | 2048 | na | na | 284 | 2014 | NDOW Unpublished, March, 2016 |
| NDOW-3-073 | Hays Canyon Range | Washoe County | NV | 41.2910380 | -119.8355784 | 2047 | na | na | 334 | 2014 | NDOW Unpublished, March, 2016 |
| NDOW-3-074 | Hays Canyon Range | Washoe County | NV | 41.2910432 | -119.8357300 | 2043 | na | na | 334 | 2014 | Jeffress et al. 2017          |
| NDOW-3-075 | Hays Canyon Range | Washoe County | NV | 41.2910432 | -119.8357338 | 2042 | na | na | 334 | 2014 | NDOW Unpublished, March, 2016 |
| NDOW-3-076 | Hays Canyon Range | Washoe County | NV | 41.2910429 | -119.8357457 | 2042 | na | na | 334 | 2014 | NDOW Unpublished, March, 2016 |
| NDOW-3-077 | Hays Canyon Range | Washoe County | NV | 41.2910467 | -119.8355907 | 2046 | na | na | 334 | 2014 | NDOW Unpublished, March, 2016 |
| NDOW-3-078 | Hays Canyon Range | Washoe County | NV | 41.2910572 | -119.8355314 | 2047 | na | na | 341 | 2014 | NDOW Unpublished, March, 2016 |
| NDOW-3-079 | Hays Canyon Range | Washoe County | NV | 41.2911344 | -119.8353198 | 2049 | na | na | 334 | 2014 | NDOW Unpublished, March, 2016 |
| NDOW-3-080 | Hays Canyon Range | Washoe County | NV | 41.2911034 | -119.8351155 | 2054 | na | na | 341 | 2014 | NDOW Unpublished, March, 2016 |
| NDOW-3-081 | Hays Canyon Range | Washoe County | NV | 41.2913366 | -119.8347912 | 2046 | na | na | 336 | 2014 | NDOW Unpublished, March, 2016 |
| NDOW-3-083 | Hays Canyon Range | Washoe County | NV | 41.2916252 | -119.8344097 | 2043 | na | na | 343 | 2014 | NDOW Unpublished, March, 2016 |
| NDOW-3-084 | Hays Canyon Range | Washoe County | NV | 41.2916893 | -119.8343600 | 2035 | na | na | 335 | 2014 | Jeffress et al. 2017          |
| NDOW-3-085 | Hays Canyon Range | Washoe County | NV | 41.2916168 | -119.8343854 | 2044 | na | na | 343 | 2014 | NDOW Unpublished, March, 2016 |

|            |                   |               |    |            |              |      |    |    |     |      |                               |
|------------|-------------------|---------------|----|------------|--------------|------|----|----|-----|------|-------------------------------|
| NDOW-3-086 | Hays Canyon Range | Washoe County | NV | 41.2918459 | -119.8338580 | 2041 | na | na | 330 | 2014 | NDOW Unpublished, March, 2016 |
| NDOW-3-087 | Hays Canyon Range | Washoe County | NV | 41.3027135 | -119.8423800 | 2072 | na | na | 256 | 2014 | Jeffress et al. 2017          |
| NDOW-3-088 | Hays Canyon Range | Washoe County | NV | 41.3027576 | -119.8424163 | 2056 | na | na | 256 | 2014 | NDOW Unpublished, March, 2016 |
| NDOW-3-089 | Hays Canyon Range | Washoe County | NV | 41.3028316 | -119.8423359 | 2059 | na | na | 251 | 2014 | NDOW Unpublished, March, 2016 |
| NDOW-3-090 | Hays Canyon Range | Washoe County | NV | 41.3028499 | -119.8423248 | 2060 | na | na | 251 | 2014 | NDOW Unpublished, March, 2016 |
| NDOW-3-091 | Hays Canyon Range | Washoe County | NV | 41.3030542 | -119.8424412 | 2058 | na | na | 251 | 2014 | NDOW Unpublished, March, 2016 |
| NDOW-3-092 | Hays Canyon Range | Washoe County | NV | 41.3030623 | -119.8424800 | 2079 | na | na | 251 | 2014 | Jeffress et al. 2017          |
| NDOW-3-093 | Hays Canyon Range | Washoe County | NV | 41.3327816 | -119.8711804 | 1999 | na | na | 283 | 2014 | NDOW Unpublished, March, 2016 |
| NDOW-3-094 | Hays Canyon Range | Washoe County | NV | 41.3329522 | -119.8711998 | 1997 | na | na | 283 | 2014 | NDOW Unpublished, March, 2016 |
| NDOW-3-095 | Hays Canyon Range | Washoe County | NV | 41.3333116 | -119.8705107 | 2015 | na | na | 348 | 2014 | NDOW Unpublished, March, 2016 |
| NDOW-3-096 | Hays Canyon Range | Washoe County | NV | 41.3333038 | -119.8704625 | 2016 | na | na | 348 | 2014 | NDOW Unpublished, March, 2016 |
| NDOW-3-097 | Hays Canyon Range | Washoe County | NV | 41.3345200 | -119.8599649 | 2049 | na | na | 283 | 2014 | NDOW Unpublished, March, 2016 |
| NDOW-3-098 | Hays Canyon Range | Washoe County | NV | 41.3344795 | -119.8597839 | 2055 | na | na | 283 | 2014 | NDOW Unpublished, March, 2016 |
| NDOW-3-099 | Hays Canyon Range | Washoe County | NV | 41.3345361 | -119.8596788 | 2057 | na | na | 337 | 2014 | NDOW Unpublished, March, 2016 |
| NDOW-3-110 | High Rock         | Washoe County | NV | 41.5010353 | -119.5164883 | 1804 | na | na | 345 | 2015 | NDOW Unpublished, March, 2016 |
| NDOW-3-111 | High Rock         | Washoe County | NV | 41.4937560 | -119.5042155 | 1775 | na | na | 183 | 2015 | NDOW Unpublished, March, 2016 |
| NDOW-3-112 | High Rock         | Washoe County | NV | 41.4965070 | -119.5085742 | 1786 | na | na | 208 | 2015 | NDOW Unpublished, March, 2016 |
| NDOW-3-113 | High Rock         | Washoe County | NV | 41.4935484 | -119.5038242 | 1778 | na | na | 197 | 2015 | NDOW Unpublished, March, 2016 |
| NDOW-3-114 | High Rock         | Washoe County | NV | 41.5009195 | -119.5168432 | 1812 | na | na | 3   | 2015 | NDOW Unpublished, March, 2016 |
| NDOW-3-116 | High Rock         | Washoe County | NV | 41.5010000 | -119.5168703 | 1808 | na | na | 3   | 2015 | NDOW Unpublished, March, 2016 |
| NDOW-3-117 | High Rock         | Washoe County | NV | 41.4970140 | -119.5092766 | 1784 | na | na | 207 | 2015 | NDOW Unpublished, March, 2016 |
| NDOW-3-119 | High Rock         | Washoe County | NV | 41.4965430 | -119.5085756 | 1785 | na | na | 208 | 2015 | NDOW Unpublished, March, 2016 |
| NDOW-3-121 | High Rock         | Washoe County | NV | 41.4935397 | -119.5038119 | 1778 | na | na | 197 | 2015 | NDOW Unpublished, March, 2016 |
| NDOW-3-123 | High Rock         | Washoe County | NV | 41.4970050 | -119.5092763 | 1784 | na | na | 207 | 2015 | NDOW Unpublished, March, 2016 |
| NDOW-3-128 | High Rock         | Washoe County | NV | 41.4937483 | -119.5041553 | 1774 | na | na | 190 | 2015 | NDOW Unpublished, March, 2016 |
| NDOW-3-130 | High Rock         | Washoe County | NV | 41.5009465 | -119.5168442 | 1810 | na | na | 3   | 2015 | NDOW Unpublished, March, 2016 |
| NDOW-3-134 | High Rock         | Washoe County | NV | 41.4936612 | -119.5040202 | 1775 | na | na | 190 | 2015 | NDOW Unpublished, March, 2016 |
| NDOW-3-137 | High Rock         | Washoe County | NV | 41.4965520 | -119.5085760 | 1785 | na | na | 208 | 2015 | NDOW Unpublished, March, 2016 |
| NDOW-3-138 | High Rock         | Washoe County | NV | 41.5010428 | -119.5165604 | 1804 | na | na | 345 | 2015 | NDOW Unpublished, March, 2016 |
| NDOW-3-139 | High Rock         | Washoe County | NV | 41.5010394 | -119.5167160 | 1804 | na | na | 3   | 2015 | NDOW Unpublished, March, 2016 |
| NDOW-3-229 | High Rock         | Washoe County | NV | 41.4775809 | -119.5694952 | 1851 | na | na | 282 | 2015 | NDOW Unpublished, March, 2016 |
| NDOW-3-230 | High Rock         | Washoe County | NV | 41.4802814 | -119.5731829 | 1880 | na | na | 235 | 2015 | NDOW Unpublished, March, 2016 |
| NDOW-3-231 | High Rock         | Washoe County | NV | 41.4802626 | -119.5732181 | 1877 | na | na | 224 | 2015 | NDOW Unpublished, March, 2016 |
| NDOW-3-232 | High Rock         | Washoe County | NV | 41.4769129 | -119.5715766 | 1880 | na | na | 75  | 2015 | NDOW Unpublished, March, 2016 |
| NDOW-3-234 | High Rock         | Washoe County | NV | 41.4774740 | -119.5694431 | 1852 | na | na | 279 | 2015 | NDOW Unpublished, March, 2016 |
| NDOW-3-235 | High Rock         | Washoe County | NV | 41.4773911 | -119.5695237 | 1850 | na | na | 277 | 2015 | NDOW Unpublished, March, 2016 |
| NDOW-3-236 | High Rock         | Washoe County | NV | 41.4769124 | -119.5716005 | 1880 | na | na | 75  | 2015 | NDOW Unpublished, March, 2016 |
| NDOW-3-237 | High Rock         | Washoe County | NV | 41.4773636 | -119.5695465 | 1849 | na | na | 277 | 2015 | NDOW Unpublished, March, 2016 |
| NDOW-3-238 | High Rock         | Washoe County | NV | 41.4776619 | -119.5694984 | 1850 | na | na | 282 | 2015 | NDOW Unpublished, March, 2016 |
| NDOW-3-239 | High Rock         | Washoe County | NV | 41.4772715 | -119.5696387 | 1846 | na | na | 277 | 2015 | NDOW Unpublished, March, 2016 |
| NDOW-3-240 | High Rock         | Washoe County | NV | 41.4769071 | -119.5714326 | 1876 | na | na | 75  | 2015 | NDOW Unpublished, March, 2016 |
| NDOW-3-241 | High Rock         | Washoe County | NV | 41.4769121 | -119.5716125 | 1881 | na | na | 75  | 2015 | NDOW Unpublished, March, 2016 |
| NDOW-3-242 | High Rock         | Washoe County | NV | 41.4769657 | -119.5712314 | 1869 | na | na | 93  | 2015 | NDOW Unpublished, March, 2016 |
| NDOW-3-243 | High Rock         | Washoe County | NV | 41.4804152 | -119.5736433 | 1868 | na | na | 246 | 2015 | NDOW Unpublished, March, 2016 |
| NDOW-3-244 | High Rock         | Washoe County | NV | 41.4768844 | -119.5712401 | 1870 | na | na | 78  | 2015 | NDOW Unpublished, March, 2016 |
| NDOW-3-245 | High Rock         | Washoe County | NV | 41.4768751 | -119.5712517 | 1871 | na | na | 78  | 2015 | NDOW Unpublished, March, 2016 |
| NDOW-3-246 | High Rock         | Washoe County | NV | 41.4769024 | -119.5712408 | 1870 | na | na | 78  | 2015 | NDOW Unpublished, March, 2016 |
| NDOW-3-247 | High Rock         | Washoe County | NV | 41.4775536 | -119.5695061 | 1850 | na | na | 282 | 2015 | NDOW Unpublished, March, 2016 |
| NDOW-3-248 | High Rock         | Washoe County | NV | 41.4777159 | -119.5695006 | 1850 | na | na | 282 | 2015 | NDOW Unpublished, March, 2016 |

|            |           |               |    |            |              |      |    |    |     |      |                               |
|------------|-----------|---------------|----|------------|--------------|------|----|----|-----|------|-------------------------------|
| NDOW-3-249 | High Rock | Washoe County | NV | 41.4772527 | -119.5696739 | 1845 | na | na | 277 | 2015 | NDOW Unpublished, March, 2016 |
| NDOW-3-251 | High Rock | Washoe County | NV | 41.4769347 | -119.5714098 | 1874 | na | na | 75  | 2015 | NDOW Unpublished, March, 2016 |
| NDOW-3-252 | High Rock | Washoe County | NV | 41.4805145 | -119.5732280 | 1886 | na | na | 235 | 2015 | NDOW Unpublished, March, 2016 |
| NDOW-3-253 | High Rock | Washoe County | NV | 41.4769224 | -119.5715530 | 1879 | na | na | 75  | 2015 | NDOW Unpublished, March, 2016 |
| NDOW-3-254 | High Rock | Washoe County | NV | 41.4769077 | -119.5714087 | 1875 | na | na | 75  | 2015 | NDOW Unpublished, March, 2016 |
| NDOW-3-255 | High Rock | Washoe County | NV | 41.4775444 | -119.5695200 | 1860 | na | na | 282 | 2015 | Jeffress et al. 2017          |
| NDOW-3-256 | High Rock | Washoe County | NV | 41.5010785 | -119.5165700 | 1805 | na | na | 345 | 2015 | Jeffress et al. 2017          |
| NDOW-3-257 | High Rock | Washoe County | NV | 41.4935951 | -119.5041600 | 1768 | na | na | 135 | 2015 | Jeffress et al. 2017          |
| NDOW-3-258 | High Rock | Washoe County | NV | 41.4935239 | -119.5041200 | 1768 | na | na | 135 | 2015 | Jeffress et al. 2017          |
| NDOW-3-259 | High Rock | Washoe County | NV | 41.5010060 | -119.5165900 | 1805 | na | na | 345 | 2015 | Jeffress et al. 2017          |
| NDOW-3-260 | High Rock | Washoe County | NV | 41.4769027 | -119.5712300 | 1860 | na | na | 78  | 2015 | Jeffress et al. 2017          |
| NDOW-3-261 | High Rock | Washoe County | NV | 41.5008983 | -119.5165800 | 1805 | na | na | 345 | 2015 | Jeffress et al. 2017          |
| NDOW-3-262 | High Rock | Washoe County | NV | 41.4802533 | -119.5732300 | 1897 | na | na | 224 | 2015 | Jeffress et al. 2017          |
| NDOW-3-267 | High Rock | Washoe County | NV | 41.4777249 | -119.5695000 | 1860 | na | na | 282 | 2015 | Jeffress et al. 2017          |
| NDOW-3-268 | High Rock | Washoe County | NV | 41.4935691 | -119.5041100 | 1768 | na | na | 135 | 2015 | Jeffress et al. 2017          |
| NDOW-3-273 | High Rock | Washoe County | NV | 41.4801726 | -119.5732100 | 1897 | na | na | 224 | 2015 | Jeffress et al. 2017          |
| NDOW-3-275 | High Rock | Washoe County | NV | 41.4937234 | -119.5040600 | 1778 | na | na | 190 | 2015 | Jeffress et al. 2017          |
| NDOW-3-276 | High Rock | Washoe County | NV | 41.4802289 | -119.5735200 | 1889 | na | na | 230 | 2015 | Jeffress et al. 2017          |
| NDOW-3-278 | High Rock | Washoe County | NV | 41.4772344 | -119.5696900 | 1862 | na | na | 277 | 2015 | Jeffress et al. 2017          |
| NDOW-3-279 | High Rock | Washoe County | NV | 41.4935511 | -119.5041100 | 1768 | na | na | 135 | 2015 | Jeffress et al. 2017          |
| NDOW-3-280 | High Rock | Washoe County | NV | 41.4935331 | -119.5041100 | 1768 | na | na | 135 | 2015 | Jeffress et al. 2017          |
| NDOW-3-281 | High Rock | Washoe County | NV | 41.5009952 | -119.5166800 | 1803 | na | na | 3   | 2015 | Jeffress et al. 2017          |
| NDOW-3-286 | High Rock | Washoe County | NV | 41.4769349 | -119.5713978 | 1874 | na | na | 75  | 2015 | NDOW Unpublished, March, 2016 |
| NDOW-3-289 | High Rock | Washoe County | NV | 41.4937118 | -119.5041800 | 1775 | na | na | 183 | 2015 | Jeffress et al. 2017          |
| NDOW-3-290 | High Rock | Washoe County | NV | 41.4935827 | -119.5043200 | 1771 | na | na | 35  | 2015 | Jeffress et al. 2017          |
| NDOW-3-294 | High Rock | Washoe County | NV | 41.5009356 | -119.5165200 | 1805 | na | na | 345 | 2015 | Jeffress et al. 2017          |
| NDOW-3-295 | High Rock | Washoe County | NV | 41.4801130 | -119.5734600 | 1889 | na | na | 230 | 2015 | Jeffress et al. 2017          |
| NDOW-3-296 | High Rock | Washoe County | NV | 41.4804422 | -119.5736444 | 1868 | na | na | 246 | 2015 | NDOW Unpublished, March, 2016 |
| NDOW-3-297 | High Rock | Washoe County | NV | 41.4805542 | -119.5734691 | 1877 | na | na | 242 | 2015 | NDOW Unpublished, March, 2016 |
| NDOW-3-298 | High Rock | Washoe County | NV | 41.4805383 | -119.5733727 | 1881 | na | na | 242 | 2015 | NDOW Unpublished, March, 2016 |
| NDOW-3-299 | High Rock | Washoe County | NV | 41.4806053 | -119.5731957 | 1889 | na | na | 249 | 2015 | NDOW Unpublished, March, 2016 |
| NDOW-3-300 | High Rock | Washoe County | NV | 41.4809874 | -119.5726240 | 1914 | na | na | 256 | 2015 | NDOW Unpublished, March, 2016 |
| NDOW-3-301 | High Rock | Washoe County | NV | 41.4810298 | -119.5723382 | 1922 | na | na | 116 | 2015 | NDOW Unpublished, March, 2016 |
| NDOW-3-302 | High Rock | Washoe County | NV | 41.4744000 | -119.5691660 | 1841 | na | na | 278 | 2015 | NDOW Unpublished, March, 2016 |
| NDOW-3-303 | High Rock | Washoe County | NV | 41.4744945 | -119.5689661 | 1849 | na | na | 271 | 2015 | NDOW Unpublished, March, 2016 |
| NDOW-3-304 | High Rock | Washoe County | NV | 41.4745856 | -119.5689200 | 1859 | na | na | 271 | 2015 | Jeffress et al. 2017          |
| NDOW-3-305 | High Rock | Washoe County | NV | 41.4743653 | -119.5691047 | 1844 | na | na | 278 | 2015 | NDOW Unpublished, March, 2016 |
| NDOW-3-306 | High Rock | Washoe County | NV | 41.4744551 | -119.5691202 | 1843 | na | na | 271 | 2015 | NDOW Unpublished, March, 2016 |
| NDOW-3-308 | High Rock | Washoe County | NV | 41.5010185 | -119.5168500 | 1803 | na | na | 3   | 2015 | Jeffress et al. 2017          |
| NDOW-3-309 | High Rock | Washoe County | NV | 41.4805237 | -119.5736236 | 1870 | na | na | 246 | 2015 | NDOW Unpublished, March, 2016 |
| NDOW-3-310 | High Rock | Washoe County | NV | 41.4812853 | -119.5729951 | 1903 | na | na | 265 | 2015 | NDOW Unpublished, March, 2016 |
| NDOW-3-311 | High Rock | Washoe County | NV | 41.4812695 | -119.5737011 | 1876 | na | na | 263 | 2015 | NDOW Unpublished, March, 2016 |
| NDOW-3-312 | High Rock | Washoe County | NV | 41.4790597 | -119.5690148 | 1860 | na | na | 281 | 2015 | NDOW Unpublished, March, 2016 |
| NDOW-3-313 | High Rock | Washoe County | NV | 41.4792672 | -119.5689990 | 1862 | na | na | 265 | 2015 | NDOW Unpublished, March, 2016 |
| NDOW-3-314 | High Rock | Washoe County | NV | 41.4792986 | -119.5692039 | 1867 | na | na | 135 | 2015 | NDOW Unpublished, March, 2016 |
| NDOW-3-315 | High Rock | Washoe County | NV | 41.4793343 | -119.5692172 | 1868 | na | na | 135 | 2015 | NDOW Unpublished, March, 2016 |
| NDOW-3-316 | High Rock | Washoe County | NV | 41.4793810 | -119.5687400 | 1866 | na | na | 272 | 2015 | NDOW Unpublished, March, 2016 |
| NDOW-3-317 | High Rock | Washoe County | NV | 41.4797150 | -119.5687053 | 1867 | na | na | 253 | 2015 | NDOW Unpublished, March, 2016 |
| NDOW-3-318 | High Rock | Washoe County | NV | 41.4802563 | -119.5686668 | 1874 | na | na | 251 | 2015 | NDOW Unpublished, March, 2016 |

|            |                   |               |    |            |              |      |    |    |      |      |                               |
|------------|-------------------|---------------|----|------------|--------------|------|----|----|------|------|-------------------------------|
| NDOW-3-319 | High Rock         | Washoe County | NV | 41.4802505 | -119.5685229 | 1876 | na | na | 251  | 2015 | NDOW Unpublished, March, 2016 |
| NDOW-3-320 | High Rock         | Washoe County | NV | 41.4801540 | -119.5680041 | 1893 | na | na | 242  | 2015 | NDOW Unpublished, March, 2016 |
| NDOW-3-321 | High Rock         | Washoe County | NV | 41.4796157 | -119.5679110 | 1894 | na | na | 263  | 2015 | NDOW Unpublished, March, 2016 |
| NDOW-3-322 | High Rock         | Washoe County | NV | 41.4792645 | -119.5679091 | 1896 | na | na | 279  | 2015 | NDOW Unpublished, March, 2016 |
| NDOW-3-323 | High Rock         | Washoe County | NV | 41.4786430 | -119.5683157 | 1885 | na | na | 279  | 2015 | NDOW Unpublished, March, 2016 |
| NDOW-3-324 | High Rock         | Washoe County | NV | 41.4788576 | -119.5683840 | 1881 | na | na | 281  | 2015 | NDOW Unpublished, March, 2016 |
| NDOW-3-325 | High Rock         | Washoe County | NV | 41.4906388 | -119.5326276 | 1944 | na | na | 25   | 2015 | NDOW Unpublished, March, 2016 |
| NDOW-3-326 | High Rock         | Washoe County | NV | 41.4935192 | -119.5404541 | 1946 | na | na | 358  | 2015 | NDOW Unpublished, March, 2016 |
| NDOW-3-327 | High Rock         | Washoe County | NV | 41.4935205 | -119.5403943 | 1946 | na | na | 358  | 2015 | NDOW Unpublished, March, 2016 |
| NDOW-3-328 | High Rock         | Washoe County | NV | 41.4906091 | -119.5327462 | 1945 | na | na | 25   | 2015 | NDOW Unpublished, March, 2016 |
| NDOW-3-329 | High Rock         | Washoe County | NV | 41.4935274 | -119.5404900 | 1941 | na | na | 358  | 2015 | Jeffress et al. 2017          |
| NDOW-3-331 | High Rock         | Washoe County | NV | 41.4935557 | -119.5404300 | 1941 | na | na | 358  | 2015 | Jeffress et al. 2017          |
| NDOW-3-334 | High Rock         | Washoe County | NV | 41.4935274 | -119.5404900 | 1941 | na | na | 358  | 2015 | Jeffress et al. 2017          |
| NDOW-3-341 | High Rock         | Washoe County | NV | 41.4906832 | -119.5326532 | 1946 | na | na | 1932 | 2015 | NDOW Unpublished, March, 2016 |
| NDOW-3-343 | High Rock         | Washoe County | NV | 41.4906692 | -119.5328803 | 1943 | na | na | 1935 | 2015 | NDOW Unpublished, March, 2016 |
| NDOW-3-344 | High Rock         | Washoe County | NV | 41.4935290 | -119.5404186 | 1943 | na | na | 1941 | 2015 | NDOW Unpublished, March, 2016 |
| NDOW-3-347 | High Rock         | Washoe County | NV | 41.4904900 | -119.5320228 | 1945 | na | na | 1932 | 2015 | NDOW Unpublished, March, 2016 |
| NDOW-3-348 | High Rock         | Washoe County | NV | 41.4907184 | -119.5326905 | 1942 | na | na | 1932 | 2015 | NDOW Unpublished, March, 2016 |
| NDOW-3-349 | High Rock         | Washoe County | NV | 41.4935274 | -119.5404904 | 1941 | na | na | 358  | 2015 | NDOW Unpublished, March, 2016 |
| NDOW-3-350 | High Rock         | Washoe County | NV | 41.4906893 | -119.5327852 | 1943 | na | na | 14   | 2015 | NDOW Unpublished, March, 2016 |
| NDOW-3-351 | High Rock         | Washoe County | NV | 41.4906181 | -119.5327465 | 1945 | na | na | 25   | 2015 | NDOW Unpublished, March, 2016 |
| NDOW-3-352 | High Rock         | Washoe County | NV | 41.4884572 | -119.5668230 | 1922 | na | na | 280  | 2015 | NDOW Unpublished, March, 2016 |
| NDOW-3-353 | High Rock         | Washoe County | NV | 41.4885347 | -119.5669818 | 1919 | na | na | 266  | 2015 | NDOW Unpublished, March, 2016 |
| NDOW-3-354 | High Rock         | Washoe County | NV | 41.4798677 | -119.5895978 | 1982 | na | na | 284  | 2015 | NDOW Unpublished, March, 2016 |
| NDOW-3-355 | High Rock         | Washoe County | NV | 41.4885012 | -119.5668726 | 1921 | na | na | 280  | 2015 | NDOW Unpublished, March, 2016 |
| NDOW-3-356 | High Rock         | Washoe County | NV | 41.4884747 | -119.5668476 | 1921 | na | na | 280  | 2015 | NDOW Unpublished, March, 2016 |
| NDOW-3-357 | High Rock         | Washoe County | NV | 41.4886161 | -119.5665657 | 1930 | na | na | 322  | 2015 | NDOW Unpublished, March, 2016 |
| NDOW-3-358 | High Rock         | Washoe County | NV | 41.4940893 | -119.6102769 | 1926 | na | na | 26   | 2015 | NDOW Unpublished, March, 2016 |
| NDOW-3-359 | High Rock         | Washoe County | NV | 41.4886881 | -119.5665686 | 1930 | na | na | 322  | 2015 | NDOW Unpublished, March, 2016 |
| NDOW-3-360 | High Rock         | Washoe County | NV | 41.4804574 | -119.5894057 | 1983 | na | na | 270  | 2015 | NDOW Unpublished, March, 2016 |
| NDOW-3-362 | High Rock         | Washoe County | NV | 41.4889254 | -119.5668295 | 1924 | na | na | 334  | 2015 | NDOW Unpublished, March, 2016 |
| NDOW-3-363 | High Rock         | Washoe County | NV | 41.4802862 | -119.5894109 | 1983 | na | na | 270  | 2015 | NDOW Unpublished, March, 2016 |
| NDOW-3-364 | High Rock         | Washoe County | NV | 41.4884570 | -119.5668350 | 1922 | na | na | 280  | 2015 | NDOW Unpublished, March, 2016 |
| NDOW-3-365 | High Rock         | Washoe County | NV | 41.4886796 | -119.5665443 | 1930 | na | na | 322  | 2015 | NDOW Unpublished, March, 2016 |
| NDOW-3-366 | High Rock         | Washoe County | NV | 41.4886346 | -119.5665425 | 1931 | na | na | 322  | 2015 | NDOW Unpublished, March, 2016 |
| NDOW-3-367 | High Rock         | Washoe County | NV | 41.4888299 | -119.5666700 | 1928 | na | na | 303  | 2015 | NDOW Unpublished, March, 2016 |
| NDOW-3-368 | High Rock         | Washoe County | NV | 41.4805599 | -119.5892541 | 1985 | na | na | 257  | 2015 | NDOW Unpublished, March, 2016 |
| NDOW-3-369 | High Rock         | Washoe County | NV | 41.4694593 | -119.5520152 | 1851 | na | na | 279  | 2015 | NDOW Unpublished, March, 2016 |
| NDOW-3-370 | High Rock         | Washoe County | NV | 41.4799132 | -119.5895757 | 1982 | na | na | 284  | 2015 | NDOW Unpublished, March, 2016 |
| NDOW-3-371 | High Rock         | Washoe County | NV | 41.4798786 | -119.5895144 | 1983 | na | na | 284  | 2015 | NDOW Unpublished, March, 2016 |
| NDOW-3-372 | High Rock         | Washoe County | NV | 41.4804209 | -119.5894282 | 1982 | na | na | 270  | 2015 | NDOW Unpublished, March, 2016 |
| NDOW-3-373 | High Rock         | Washoe County | NV | 41.4884818 | -119.5669318 | 1920 | na | na | 280  | 2015 | NDOW Unpublished, March, 2016 |
| NDOW-3-374 | High Rock         | Washoe County | NV | 41.4806417 | -119.5892215 | 1986 | na | na | 257  | 2015 | NDOW Unpublished, March, 2016 |
| NDOW-3-376 | High Rock         | Washoe County | NV | 41.4799561 | -119.5896732 | 1980 | na | na | 284  | 2015 | NDOW Unpublished, March, 2016 |
| NDOW-3-377 | High Rock         | Washoe County | NV | 41.4805523 | -119.5891939 | 1986 | na | na | 270  | 2015 | NDOW Unpublished, March, 2016 |
| NDOW-3-378 | High Rock         | Washoe County | NV | 41.4696691 | -119.5522988 | 1841 | na | na | 276  | 2015 | NDOW Unpublished, March, 2016 |
| NDOW-3-379 | High Rock         | Washoe County | NV | 41.4805692 | -119.5892425 | 1986 | na | na | 257  | 2015 | NDOW Unpublished, March, 2016 |
| NDOW-3-38  | Hays Canyon Range | Washoe County | NV | 41.3014859 | -119.8253063 | 2025 | na | na | 162  | 2014 | NDOW Unpublished, March, 2016 |
| NDOW-3-380 | High Rock         | Washoe County | NV | 41.4803397 | -119.5894370 | 1982 | na | na | 270  | 2015 | NDOW Unpublished, March, 2016 |

|            |                   |               |    |            |              |      |    |    |     |      |                               |
|------------|-------------------|---------------|----|------------|--------------|------|----|----|-----|------|-------------------------------|
| NDOW-3-381 | High Rock         | Washoe County | NV | 41.4803759 | -119.5894264 | 1982 | na | na | 270 | 2015 | NDOW Unpublished, March, 2016 |
| NDOW-3-384 | High Rock         | Washoe County | NV | 41.4694778 | -119.5519920 | 1851 | na | na | 279 | 2015 | NDOW Unpublished, March, 2016 |
| NDOW-3-385 | High Rock         | Washoe County | NV | 41.4884911 | -119.5669201 | 1920 | na | na | 280 | 2015 | NDOW Unpublished, March, 2016 |
| NDOW-3-387 | High Rock         | Washoe County | NV | 41.4890151 | -119.5668450 | 1924 | na | na | 334 | 2015 | NDOW Unpublished, March, 2016 |
| NDOW-3-388 | High Rock         | Washoe County | NV | 41.4886269 | -119.5668900 | 1933 | na | na | 303 | 2015 | Jeffress et al. 2017          |
| NDOW-3-389 | High Rock         | Washoe County | NV | 41.4940547 | -119.6102200 | 1929 | na | na | 26  | 2015 | Jeffress et al. 2017          |
| NDOW-3-390 | High Rock         | Washoe County | NV | 41.4694857 | -119.5524500 | 1850 | na | na | 276 | 2015 | Jeffress et al. 2017          |
| NDOW-3-392 | High Rock         | Washoe County | NV | 41.4693634 | -119.5522700 | 1851 | na | na | 277 | 2015 | Jeffress et al. 2017          |
| NDOW-3-393 | High Rock         | Washoe County | NV | 41.4886254 | -119.5665500 | 1936 | na | na | 322 | 2015 | Jeffress et al. 2017          |
| NDOW-3-395 | High Rock         | Washoe County | NV | 41.4888299 | -119.5666700 | 1933 | na | na | 303 | 2015 | Jeffress et al. 2017          |
| NDOW-3-396 | High Rock         | Washoe County | NV | 41.4884800 | -119.5670200 | 1928 | na | na | 266 | 2015 | Jeffress et al. 2017          |
| NDOW-3-397 | High Rock         | Washoe County | NV | 41.4944020 | -119.6103900 | 1923 | na | na | 352 | 2015 | Jeffress et al. 2017          |
| NDOW-3-398 | High Rock         | Washoe County | NV | 41.4889437 | -119.5668200 | 1929 | na | na | 334 | 2015 | Jeffress et al. 2017          |
| NDOW-3-399 | High Rock         | Washoe County | NV | 41.4889481 | -119.5670200 | 1926 | na | na | 319 | 2015 | Jeffress et al. 2017          |
| NDOW-3-400 | High Rock         | Washoe County | NV | 41.4886261 | -119.5669300 | 1933 | na | na | 303 | 2015 | Jeffress et al. 2017          |
| NDOW-3-401 | High Rock         | Washoe County | NV | 41.4694484 | -119.5521000 | 1862 | na | na | 279 | 2015 | Jeffress et al. 2017          |
| NDOW-3-402 | High Rock         | Washoe County | NV | 41.4885980 | -119.5669700 | 1928 | na | na | 266 | 2015 | Jeffress et al. 2017          |
| NDOW-3-403 | High Rock         | Washoe County | NV | 41.4940803 | -119.6102800 | 1930 | na | na | 345 | 2015 | Jeffress et al. 2017          |
| NDOW-3-404 | High Rock         | Washoe County | NV | 41.4798500 | -119.5895900 | 1987 | na | na | 284 | 2015 | Jeffress et al. 2017          |
| NDOW-3-406 | High Rock         | Washoe County | NV | 41.4889347 | -119.5668200 | 1929 | na | na | 334 | 2015 | Jeffress et al. 2017          |
| NDOW-3-408 | High Rock         | Washoe County | NV | 41.4798595 | -119.5895600 | 1987 | na | na | 284 | 2015 | Jeffress et al. 2017          |
| NDOW-3-410 | High Rock         | Washoe County | NV | 41.4943576 | -119.6103600 | 1923 | na | na | 352 | 2015 | Jeffress et al. 2017          |
| NDOW-3-411 | High Rock         | Washoe County | NV | 41.4945117 | -119.6103200 | 1915 | na | na | 353 | 2015 | Jeffress et al. 2017          |
| NDOW-3-413 | High Rock         | Washoe County | NV | 41.4944198 | -119.6104000 | 1923 | na | na | 352 | 2015 | Jeffress et al. 2017          |
| NDOW-3-414 | High Rock         | Washoe County | NV | 41.4942957 | -119.6103100 | 1923 | na | na | 352 | 2015 | Jeffress et al. 2017          |
| NDOW-3-415 | High Rock         | Washoe County | NV | 41.4890107 | -119.5666400 | 1931 | na | na | 338 | 2015 | Jeffress et al. 2017          |
| NDOW-3-416 | High Rock         | Washoe County | NV | 41.4946300 | -119.6102600 | 1915 | na | na | 15  | 2015 | Jeffress et al. 2017          |
| NDOW-3-417 | High Rock         | Washoe County | NV | 41.4890514 | -119.5668300 | 1929 | na | na | 334 | 2015 | Jeffress et al. 2017          |
| NDOW-3-418 | High Rock         | Washoe County | NV | 41.4888933 | -119.5670600 | 1926 | na | na | 319 | 2015 | Jeffress et al. 2017          |
| NDOW-3-419 | High Rock         | Washoe County | NV | 41.4694016 | -119.5521800 | 1864 | na | na | 277 | 2015 | Jeffress et al. 2017          |
| NDOW-3-420 | High Rock         | Washoe County | NV | 41.4694775 | -119.5524100 | 1850 | na | na | 276 | 2015 | Jeffress et al. 2017          |
| NDOW-3-422 | High Rock         | Washoe County | NV | 41.4889440 | -119.5668100 | 1929 | na | na | 334 | 2015 | Jeffress et al. 2017          |
| NDOW-3-423 | High Rock         | Washoe County | NV | 41.4946022 | -119.6103000 | 1915 | na | na | 353 | 2015 | Jeffress et al. 2017          |
| NDOW-3-424 | High Rock         | Washoe County | NV | 41.4799651 | -119.5896700 | 1987 | na | na | 284 | 2015 | Jeffress et al. 2017          |
| NDOW-3-425 | High Rock         | Washoe County | NV | 41.4940800 | -119.6102900 | 1930 | na | na | 345 | 2015 | Jeffress et al. 2017          |
| NDOW-3-427 | High Rock         | Washoe County | NV | 41.4805975 | -119.5891838 | 1986 | na | na | 257 | 2015 | NDOW Unpublished, March, 2016 |
| NDOW-3-429 | High Rock         | Washoe County | NV | 41.4696694 | -119.5522869 | 1841 | na | na | 276 | 2015 | NDOW Unpublished, March, 2016 |
| NDOW-3-433 | High Rock         | Washoe County | NV | 41.4701574 | -119.5522102 | 1841 | na | na | 282 | 2015 | NDOW Unpublished, March, 2016 |
| NDOW-3-434 | High Rock         | Washoe County | NV | 41.4701138 | -119.5521486 | 1842 | na | na | 282 | 2015 | NDOW Unpublished, March, 2016 |
| NDOW-3-435 | High Rock         | Washoe County | NV | 41.4700788 | -119.5521000 | 1858 | na | na | 282 | 2015 | Jeffress et al. 2017          |
| NDOW-3-436 | High Rock         | Washoe County | NV | 41.4701482 | -119.5522218 | 1841 | na | na | 282 | 2015 | NDOW Unpublished, March, 2016 |
| NDOW-3-437 | High Rock         | Washoe County | NV | 41.4702591 | -119.5520900 | 1858 | na | na | 282 | 2015 | Jeffress et al. 2017          |
| NDOW-3-438 | High Rock         | Washoe County | NV | 41.4706307 | -119.5519900 | 1855 | na | na | 262 | 2015 | Jeffress et al. 2017          |
| NDOW-3-439 | High Rock         | Washoe County | NV | 41.4955001 | -119.5724678 | 2012 | na | na | 266 | 2015 | NDOW Unpublished, March, 2016 |
| NDOW-3-44  | Hays Canyon Range | Washoe County | NV | 41.3024137 | -119.7887641 | 2211 | na | na | 333 | 2014 | NDOW Unpublished, March, 2016 |
| NDOW-3-440 | High Rock         | Washoe County | NV | 41.4954747 | -119.5723949 | 2014 | na | na | 266 | 2015 | NDOW Unpublished, March, 2016 |
| NDOW-3-441 | High Rock         | Washoe County | NV | 41.4954956 | -119.5722640 | 2017 | na | na | 266 | 2015 | NDOW Unpublished, March, 2016 |
| NDOW-3-442 | High Rock         | Washoe County | NV | 41.4956756 | -119.5722711 | 2017 | na | na | 265 | 2015 | NDOW Unpublished, March, 2016 |
| NDOW-3-443 | High Rock         | Washoe County | NV | 41.4958381 | -119.5722536 | 2018 | na | na | 270 | 2015 | NDOW Unpublished, March, 2016 |

|            |           |               |    |            |              |      |    |    |     |      |                               |
|------------|-----------|---------------|----|------------|--------------|------|----|----|-----|------|-------------------------------|
| NDOW-3-444 | High Rock | Washoe County | NV | 41.4960726 | -119.5722389 | 2019 | na | na | 270 | 2015 | NDOW Unpublished, March, 2016 |
| NDOW-3-445 | High Rock | Washoe County | NV | 41.4960413 | -119.5724294 | 2014 | na | na | 270 | 2015 | NDOW Unpublished, March, 2016 |
| NDOW-3-446 | High Rock | Washoe County | NV | 41.4908844 | -119.5702488 | 1943 | na | na | 202 | 2015 | NDOW Unpublished, March, 2016 |
| NDOW-3-447 | High Rock | Washoe County | NV | 41.4909016 | -119.5702854 | 1943 | na | na | 190 | 2015 | NDOW Unpublished, March, 2016 |
| NDOW-3-448 | High Rock | Washoe County | NV | 41.4909445 | -119.5703829 | 1944 | na | na | 190 | 2015 | NDOW Unpublished, March, 2016 |
| NDOW-3-449 | High Rock | Washoe County | NV | 41.4909074 | -119.5704294 | 1945 | na | na | 190 | 2015 | NDOW Unpublished, March, 2016 |
| NDOW-3-450 | High Rock | Washoe County | NV | 41.4909156 | -119.5704656 | 1945 | na | na | 190 | 2015 | NDOW Unpublished, March, 2016 |
| NDOW-3-451 | High Rock | Washoe County | NV | 41.4907669 | -119.5702700 | 1933 | na | na | 156 | 2015 | Jeffress et al. 2017          |
| NDOW-3-452 | High Rock | Washoe County | NV | 41.4947178 | -119.6111500 | 1922 | na | na | 69  | 2015 | Jeffress et al. 2017          |
| NDOW-3-453 | High Rock | Washoe County | NV | 41.4946178 | -119.6111966 | 1931 | na | na | 69  | 2015 | NDOW Unpublished, March, 2016 |
| NDOW-3-454 | High Rock | Washoe County | NV | 41.4945281 | -119.6111810 | 1931 | na | na | 69  | 2015 | NDOW Unpublished, March, 2016 |
| NDOW-3-455 | High Rock | Washoe County | NV | 41.4945363 | -119.6112200 | 1922 | na | na | 69  | 2015 | Jeffress et al. 2017          |
| NDOW-3-456 | High Rock | Washoe County | NV | 41.4944561 | -119.6111781 | 1931 | na | na | 69  | 2015 | NDOW Unpublished, March, 2016 |
| NDOW-3-457 | High Rock | Washoe County | NV | 41.4945379 | -119.6111454 | 1930 | na | na | 69  | 2015 | NDOW Unpublished, March, 2016 |
| NDOW-3-458 | High Rock | Washoe County | NV | 41.4787524 | -119.5903318 | 1982 | na | na | 293 | 2015 | NDOW Unpublished, March, 2016 |
| NDOW-3-459 | High Rock | Washoe County | NV | 41.4788440 | -119.5902636 | 1981 | na | na | 186 | 2015 | NDOW Unpublished, March, 2016 |
| NDOW-3-460 | High Rock | Washoe County | NV | 41.4788533 | -119.5902520 | 1981 | na | na | 186 | 2015 | NDOW Unpublished, March, 2016 |
| NDOW-3-461 | High Rock | Washoe County | NV | 41.4790052 | -119.5903060 | 1978 | na | na | 304 | 2015 | NDOW Unpublished, March, 2016 |
| NDOW-3-462 | High Rock | Washoe County | NV | 41.4791984 | -119.5901221 | 1980 | na | na | 298 | 2015 | NDOW Unpublished, March, 2016 |
| NDOW-3-463 | High Rock | Washoe County | NV | 41.4792080 | -119.5900985 | 1980 | na | na | 298 | 2015 | NDOW Unpublished, March, 2016 |
| NDOW-3-464 | High Rock | Washoe County | NV | 41.4793268 | -119.5900194 | 1980 | na | na | 298 | 2015 | NDOW Unpublished, March, 2016 |
| NDOW-3-465 | High Rock | Washoe County | NV | 41.4794187 | -119.5899392 | 1980 | na | na | 285 | 2015 | NDOW Unpublished, March, 2016 |
| NDOW-3-466 | High Rock | Washoe County | NV | 41.4797587 | -119.5896414 | 1982 | na | na | 284 | 2015 | NDOW Unpublished, March, 2016 |
| NDOW-3-467 | High Rock | Washoe County | NV | 41.4798105 | -119.5897400 | 1982 | na | na | 288 | 2015 | Jeffress et al. 2017          |
| NDOW-3-468 | High Rock | Washoe County | NV | 41.4698097 | -119.5520529 | 1847 | na | na | 279 | 2015 | NDOW Unpublished, March, 2016 |
| NDOW-3-469 | High Rock | Washoe County | NV | 41.4696136 | -119.5519614 | 1852 | na | na | 279 | 2015 | NDOW Unpublished, March, 2016 |
| NDOW-3-470 | High Rock | Washoe County | NV | 41.4698211 | -119.5519456 | 1851 | na | na | 279 | 2015 | NDOW Unpublished, March, 2016 |
| NDOW-3-471 | High Rock | Washoe County | NV | 41.4698033 | -119.5519329 | 1852 | na | na | 282 | 2015 | NDOW Unpublished, March, 2016 |
| NDOW-3-472 | High Rock | Washoe County | NV | 41.4877077 | -119.5669132 | 1927 | na | na | 270 | 2015 | NDOW Unpublished, March, 2016 |
| NDOW-3-473 | High Rock | Washoe County | NV | 41.4880226 | -119.5669256 | 1925 | na | na | 278 | 2015 | NDOW Unpublished, March, 2016 |
| NDOW-3-474 | High Rock | Washoe County | NV | 41.4881592 | -119.5668591 | 1923 | na | na | 279 | 2015 | NDOW Unpublished, March, 2016 |
| NDOW-3-475 | High Rock | Washoe County | NV | 41.4882532 | -119.566832  | 1927 | na | na | 279 | 2015 | NDOW Unpublished, March, 2016 |
| NDOW-3-476 | High Rock | Washoe County | NV | 41.4881855 | -119.5664889 | 1932 | na | na | 288 | 2015 | NDOW Unpublished, March, 2016 |
| NDOW-3-481 | High Rock | Washoe County | NV | 41.4939252 | -119.6107600 | 1926 | na | na | 316 | 2015 | Jeffress et al. 2017          |
| NDOW-3-482 | High Rock | Washoe County | NV | 41.4939361 | -119.6106800 | 1926 | na | na | 316 | 2015 | Jeffress et al. 2017          |
| NDOW-3-483 | High Rock | Washoe County | NV | 41.4807208 | -119.5893084 | 1984 | na | na | 257 | 2015 | NDOW Unpublished, March, 2016 |
| NDOW-3-484 | High Rock | Washoe County | NV | 41.4807846 | -119.5892751 | 1985 | na | na | 257 | 2015 | NDOW Unpublished, March, 2016 |
| NDOW-3-485 | High Rock | Washoe County | NV | 41.4808915 | -119.5893272 | 1985 | na | na | 251 | 2015 | NDOW Unpublished, March, 2016 |
| NDOW-3-486 | High Rock | Washoe County | NV | 41.4811722 | -119.5896618 | 1982 | na | na | 264 | 2015 | NDOW Unpublished, March, 2016 |
| NDOW-3-487 | High Rock | Washoe County | NV | 41.4812344 | -119.5897002 | 1981 | na | na | 264 | 2015 | NDOW Unpublished, March, 2016 |
| NDOW-3-488 | High Rock | Washoe County | NV | 41.4814839 | -119.5898179 | 1981 | na | na | 251 | 2015 | NDOW Unpublished, March, 2016 |
| NDOW-3-489 | High Rock | Washoe County | NV | 41.4816292 | -119.5897638 | 1982 | na | na | 251 | 2015 | NDOW Unpublished, March, 2016 |
| NDOW-3-490 | High Rock | Washoe County | NV | 41.5382025 | -119.6011190 | 1967 | na | na | 272 | 2015 | NDOW Unpublished, March, 2016 |
| NDOW-3-491 | High Rock | Washoe County | NV | 41.5383806 | -119.6012101 | 1964 | na | na | 278 | 2015 | NDOW Unpublished, March, 2016 |
| NDOW-3-492 | High Rock | Washoe County | NV | 41.5380602 | -119.6010414 | 1969 | na | na | 281 | 2015 | NDOW Unpublished, March, 2016 |
| NDOW-3-493 | High Rock | Washoe County | NV | 41.5384605 | -119.6012612 | 1963 | na | na | 278 | 2015 | NDOW Unpublished, March, 2016 |
| NDOW-3-494 | High Rock | Washoe County | NV | 41.5381808 | -119.6012860 | 1962 | na | na | 272 | 2015 | NDOW Unpublished, March, 2016 |
| NDOW-3-495 | High Rock | Washoe County | NV | 41.5385496 | -119.6009052 | 1973 | na | na | 290 | 2015 | NDOW Unpublished, March, 2016 |
| NDOW-3-496 | High Rock | Washoe County | NV | 41.5379037 | -119.6007954 | 1974 | na | na | 274 | 2015 | NDOW Unpublished, March, 2016 |

|            |                    |               |    |            |              |      |    |    |     |      |                               |
|------------|--------------------|---------------|----|------------|--------------|------|----|----|-----|------|-------------------------------|
| NDOW-3-497 | High Rock          | Washoe County | NV | 41.5381805 | -119.6012979 | 1962 | na | na | 272 | 2015 | NDOW Unpublished, March, 2016 |
| NDOW-3-498 | High Rock          | Washoe County | NV | 41.5385344 | -119.6011803 | 1965 | na | na | 278 | 2015 | NDOW Unpublished, March, 2016 |
| NDOW-3-499 | High Rock          | Washoe County | NV | 41.5380313 | -119.6007286 | 1977 | na | na | 274 | 2015 | NDOW Unpublished, March, 2016 |
| NDOW-3-501 | High Rock          | Washoe County | NV | 41.5381423 | -119.6013923 | 1959 | na | na | 268 | 2015 | NDOW Unpublished, March, 2016 |
| NDOW-3-502 | High Rock          | Washoe County | NV | 41.5383626 | -119.6012094 | 1964 | na | na | 278 | 2015 | NDOW Unpublished, March, 2016 |
| NDOW-3-503 | High Rock          | Washoe County | NV | 41.5385494 | -119.6009172 | 1973 | na | na | 290 | 2015 | NDOW Unpublished, March, 2016 |
| NDOW-3-504 | High Rock          | Washoe County | NV | 41.5382015 | -119.6011669 | 1966 | na | na | 272 | 2015 | NDOW Unpublished, March, 2016 |
| NDOW-3-505 | High Rock          | Washoe County | NV | 41.5382827 | -119.6011582 | 1966 | na | na | 272 | 2015 | NDOW Unpublished, March, 2016 |
| NDOW-3-506 | High Rock          | Washoe County | NV | 41.5381840 | -119.6011423 | 1966 | na | na | 272 | 2015 | NDOW Unpublished, March, 2016 |
| NDOW-3-507 | High Rock          | Washoe County | NV | 41.5382489 | -119.6010609 | 1969 | na | na | 281 | 2015 | NDOW Unpublished, March, 2016 |
| NDOW-3-508 | High Rock          | Washoe County | NV | 41.5381467 | -119.6012007 | 1964 | na | na | 272 | 2015 | NDOW Unpublished, March, 2016 |
| NDOW-3-509 | High Rock          | Washoe County | NV | 41.5381429 | -119.6013700 | 1978 | na | na | 272 | 2015 | Jeffress et al. 2017          |
| NDOW-3-510 | High Rock          | Washoe County | NV | 41.5381927 | -119.6011500 | 1978 | na | na | 272 | 2015 | Jeffress et al. 2017          |
| NDOW-3-511 | High Rock          | Washoe County | NV | 41.5380428 | -119.6010200 | 1983 | na | na | 260 | 2015 | Jeffress et al. 2017          |
| NDOW-3-512 | High Rock          | Washoe County | NV | 41.5381229 | -119.6010600 | 1983 | na | na | 281 | 2015 | Jeffress et al. 2017          |
| NDOW-3-513 | High Rock          | Washoe County | NV | 41.5355644 | -119.5987000 | 1995 | na | na | 240 | 2015 | Jeffress et al. 2017          |
| NDOW-3-514 | High Rock          | Washoe County | NV | 41.5354763 | -119.5986124 | 1983 | na | na | 231 | 2015 | NDOW Unpublished, March, 2016 |
| NDOW-3-515 | High Rock          | Washoe County | NV | 41.5357545 | -119.5986595 | 1988 | na | na | 240 | 2015 | NDOW Unpublished, March, 2016 |
| NDOW-3-516 | High Rock          | Washoe County | NV | 41.5359720 | -119.5986000 | 1995 | na | na | 18  | 2015 | Jeffress et al. 2017          |
| NDOW-3-517 | High Rock          | Washoe County | NV | 41.5371346 | -119.5997577 | 1988 | na | na | 235 | 2015 | NDOW Unpublished, March, 2016 |
| NDOW-3-518 | High Rock          | Washoe County | NV | 41.5371480 | -119.5999620 | 1984 | na | na | 235 | 2015 | NDOW Unpublished, March, 2016 |
| NDOW-3-519 | High Rock          | Washoe County | NV | 41.5373830 | -119.5999235 | 1987 | na | na | 288 | 2015 | NDOW Unpublished, March, 2016 |
| NDOW-3-520 | High Rock          | Washoe County | NV | 41.5374007 | -119.5999361 | 1987 | na | na | 288 | 2015 | NDOW Unpublished, March, 2016 |
| NDOW-3-521 | High Rock          | Washoe County | NV | 41.5375327 | -119.6000733 | 1987 | na | na | 315 | 2015 | NDOW Unpublished, March, 2016 |
| NDOW-3-522 | High Rock          | Washoe County | NV | 41.5374670 | -119.6001905 | 1983 | na | na | 257 | 2015 | NDOW Unpublished, March, 2016 |
| NDOW-3-523 | High Rock          | Washoe County | NV | 41.5376926 | -119.6005712 | 1978 | na | na | 253 | 2015 | NDOW Unpublished, March, 2016 |
| NDOW-3-524 | High Rock          | Washoe County | NV | 41.5376550 | -119.6006416 | 1976 | na | na | 253 | 2015 | NDOW Unpublished, March, 2016 |
| NDOW-3-525 | High Rock          | Washoe County | NV | 41.5377010 | -119.6005955 | 1978 | na | na | 253 | 2015 | NDOW Unpublished, March, 2016 |
| NDOW-3-527 | High Rock          | Washoe County | NV | 41.5382215 | -119.4863323 | 1828 | na | na | 270 | 2015 | NDOW Unpublished, March, 2016 |
| NDOW-3-528 | High Rock          | Washoe County | NV | 41.5379197 | -119.4861300 | 1838 | na | na | 270 | 2015 | Jeffress et al. 2017          |
| NDOW-3-529 | High Rock          | Washoe County | NV | 41.5384491 | -119.4862200 | 1838 | na | na | 273 | 2015 | Jeffress et al. 2017          |
| NDOW-3-530 | High Rock          | Washoe County | NV | 41.5376484 | -119.4861785 | 1834 | na | na | 270 | 2015 | NDOW Unpublished, March, 2016 |
| NDOW-3-531 | High Rock          | Washoe County | NV | 41.5366771 | -119.4856977 | 1858 | na | na | 265 | 2015 | NDOW Unpublished, March, 2016 |
| NDOW-3-582 | Mosquito Mountains | Washoe County | NV | 41.8058785 | -119.9389836 | 1908 | na | na | 210 | 2015 | NDOW Unpublished, March, 2016 |
| NDOW-3-596 | Mosquito Mountains | Washoe County | NV | 41.8058686 | -119.9390193 | 1907 | na | na | 210 | 2015 | NDOW Unpublished, March, 2016 |
| NDOW-3-597 | Mosquito Mountains | Washoe County | NV | 41.8058404 | -119.9390661 | 1905 | na | na | 210 | 2015 | NDOW Unpublished, March, 2016 |
| NDOW-3-598 | Mosquito Mountains | Washoe County | NV | 41.8057580 | -119.9394700 | 1899 | na | na | 215 | 2015 | Jeffress et al. 2017          |
| NDOW-3-599 | Mosquito Mountains | Washoe County | NV | 41.8059232 | -119.9389977 | 1910 | na | na | 210 | 2015 | NDOW Unpublished, March, 2016 |
| NDOW-3-601 | Mosquito Mountains | Washoe County | NV | 41.8059486 | -119.9390590 | 1910 | na | na | 210 | 2015 | NDOW Unpublished, March, 2016 |
| NDOW-3-602 | Mosquito Mountains | Washoe County | NV | 41.8059012 | -119.9391532 | 1905 | na | na | 210 | 2015 | NDOW Unpublished, March, 2016 |
| NDOW-3-612 | Mosquito Mountains | Washoe County | NV | 41.8152835 | -119.9532458 | 1809 | na | na | 242 | 2015 | NDOW Unpublished, March, 2016 |
| NDOW-3-613 | Mosquito Mountains | Washoe County | NV | 41.8156775 | -119.9533361 | 1809 | na | na | 254 | 2015 | NDOW Unpublished, March, 2016 |
| NDOW-3-614 | Mosquito Mountains | Washoe County | NV | 41.8156129 | -119.9533934 | 1807 | na | na | 254 | 2015 | NDOW Unpublished, March, 2016 |
| NDOW-3-615 | Mosquito Mountains | Washoe County | NV | 41.8154340 | -119.9533490 | 1808 | na | na | 243 | 2015 | NDOW Unpublished, March, 2016 |
| NDOW-3-616 | Mosquito Mountains | Washoe County | NV | 41.8154259 | -119.9533125 | 1809 | na | na | 242 | 2015 | NDOW Unpublished, March, 2016 |
| NDOW-3-617 | Mosquito Mountains | Washoe County | NV | 41.8152649 | -119.9532690 | 1808 | na | na | 235 | 2015 | NDOW Unpublished, March, 2016 |
| NDOW-3-619 | Mosquito Mountains | Washoe County | NV | 41.8054967 | -119.9391200 | 1899 | na | na | 205 | 2015 | Jeffress et al. 2017          |
| NDOW-3-620 | Mosquito Mountains | Washoe County | NV | 41.8054701 | -119.9391100 | 1899 | na | na | 205 | 2015 | Jeffress et al. 2017          |
| NDOW-3-621 | Mosquito Mountains | Washoe County | NV | 41.8153375 | -119.9532483 | 1810 | na | na | 242 | 2015 | NDOW Unpublished, March, 2016 |



|            |                     |               |    |            |              |      |    |    |     |      |                               |
|------------|---------------------|---------------|----|------------|--------------|------|----|----|-----|------|-------------------------------|
| NDOW-3-622 | Mosquito Mountains  | Washoe County | NV | 41.8153114 | -119.9532110 | 1811 | na | na | 242 | 2015 | NDOW Unpublished, March, 2016 |
| NDOW-3-626 | Painted Point Range | Washoe County | NV | 41.7526444 | -119.7045471 | 1818 | na | na | 306 | 2015 | NDOW Unpublished, March, 2016 |
| NDOW-3-627 | Painted Point Range | Washoe County | NV | 41.7525735 | -119.7044960 | 1818 | na | na | 306 | 2015 | NDOW Unpublished, March, 2016 |
| NDOW-3-628 | Painted Point Range | Washoe County | NV | 41.7526953 | -119.7042966 | 1819 | na | na | 304 | 2015 | NDOW Unpublished, March, 2016 |
| NDOW-3-629 | Painted Point Range | Washoe County | NV | 41.7529706 | -119.7040797 | 1818 | na | na | 306 | 2015 | NDOW Unpublished, March, 2016 |
| NDOW-3-630 | Painted Point Range | Washoe County | NV | 41.7536437 | -119.7057075 | 1798 | na | na | 339 | 2015 | NDOW Unpublished, March, 2016 |
| NDOW-3-631 | Painted Point Range | Washoe County | NV | 41.7536403 | -119.7058517 | 1795 | na | na | 343 | 2015 | NDOW Unpublished, March, 2016 |
| NDOW-3-632 | Painted Point Range | Washoe County | NV | 41.7536437 | -119.7057100 | 1772 | na | na | 339 | 2015 | Jeffress et al. 2017          |
| NDOW-3-634 | Painted Point Range | Washoe County | NV | 41.7536400 | -119.7058600 | 1769 | na | na | 343 | 2015 | Jeffress et al. 2017          |
| NDOW-3-635 | Painted Point Range | Washoe County | NV | 41.7536569 | -119.7059100 | 1769 | na | na | 343 | 2015 | Jeffress et al. 2017          |
| NDOW-3-636 | Painted Point Range | Washoe County | NV | 41.7533554 | -119.7060923 | 1802 | na | na | 351 | 2015 | NDOW Unpublished, March, 2016 |
| NDOW-3-637 | Painted Point Range | Washoe County | NV | 41.7536009 | -119.7059944 | 1793 | na | na | 351 | 2015 | NDOW Unpublished, March, 2016 |
| NDOW-3-638 | Painted Point Range | Washoe County | NV | 41.7534685 | -119.7058806 | 1801 | na | na | 351 | 2015 | NDOW Unpublished, March, 2016 |
| NDOW-3-639 | Painted Point Range | Washoe County | NV | 41.7521484 | -119.7045743 | 1822 | na | na | 300 | 2015 | NDOW Unpublished, March, 2016 |
| NDOW-3-640 | Painted Point Range | Washoe County | NV | 41.7517942 | -119.7043189 | 1823 | na | na | 300 | 2015 | NDOW Unpublished, March, 2016 |
| NDOW-3-641 | Painted Point Range | Washoe County | NV | 41.7517115 | -119.7043876 | 1823 | na | na | 300 | 2015 | NDOW Unpublished, March, 2016 |
| NDOW-3-642 | Painted Point Range | Washoe County | NV | 41.7519682 | -119.7045788 | 1822 | na | na | 300 | 2015 | NDOW Unpublished, March, 2016 |
| NDOW-3-643 | Painted Point Range | Washoe County | NV | 41.7520179 | -119.7047613 | 1822 | na | na | 312 | 2015 | NDOW Unpublished, March, 2016 |
| NDOW-3-645 | Painted Point Range | Washoe County | NV | 41.7519962 | -119.7049167 | 1822 | na | na | 312 | 2015 | NDOW Unpublished, March, 2016 |
| NDOW-3-646 | Painted Point Range | Washoe County | NV | 41.7520311 | -119.7049700 | 1812 | na | na | 312 | 2015 | Jeffress et al. 2017          |
| NDOW-3-647 | Painted Point Range | Washoe County | NV | 41.7520568 | -119.7042578 | 1823 | na | na | 305 | 2015 | NDOW Unpublished, March, 2016 |
| NDOW-3-712 | Mosquito Mountains  | Washoe County | NV | 41.7699020 | -119.9191700 | 1880 | na | na | 358 | 2015 | Jeffress et al. 2017          |
| NDOW-3-713 | Mosquito Mountains  | Washoe County | NV | 41.7698334 | -119.9190392 | 1884 | na | na | 3   | 2015 | NDOW Unpublished, March, 2016 |
| NDOW-3-714 | Mosquito Mountains  | Washoe County | NV | 41.7698007 | -119.9192663 | 1885 | na | na | 358 | 2015 | NDOW Unpublished, March, 2016 |
| NDOW-3-715 | Mosquito Mountains  | Washoe County | NV | 41.7697743 | -119.9192411 | 1885 | na | na | 358 | 2015 | NDOW Unpublished, March, 2016 |
| NDOW-3-716 | Mosquito Mountains  | Washoe County | NV | 41.7697052 | -119.9194785 | 1886 | na | na | 326 | 2015 | NDOW Unpublished, March, 2016 |
| NDOW-3-717 | Mosquito Mountains  | Washoe County | NV | 41.7696971 | -119.9194421 | 1886 | na | na | 355 | 2015 | NDOW Unpublished, March, 2016 |
| NDOW-3-718 | Mosquito Mountains  | Washoe County | NV | 41.7697337 | -119.9194197 | 1885 | na | na | 358 | 2015 | NDOW Unpublished, March, 2016 |
| NDOW-3-719 | Mosquito Mountains  | Washoe County | NV | 41.7697996 | -119.9189535 | 1885 | na | na | 3   | 2015 | NDOW Unpublished, March, 2016 |
| NDOW-3-72  | Hays Canyon Range   | Washoe County | NV | 41.3291247 | -119.8654161 | 2048 | na | na | 277 | 2014 | NDOW Unpublished, March, 2016 |
| NDOW-3-720 | Mosquito Mountains  | Washoe County | NV | 41.7697856 | -119.9187965 | 1885 | na | na | 0   | 2015 | NDOW Unpublished, March, 2016 |
| NDOW-3-721 | Painted Point Range | Washoe County | NV | 41.7571687 | -119.6882954 | 2005 | na | na | 296 | 2015 | NDOW Unpublished, March, 2016 |
| NDOW-3-722 | Painted Point Range | Washoe County | NV | 41.7572396 | -119.6883500 | 1966 | na | na | 296 | 2015 | Jeffress et al. 2017          |
| NDOW-3-731 | Mosquito Mountains  | Washoe County | NV | 41.7637446 | -119.9204951 | 1867 | na | na | 267 | 2015 | NDOW Unpublished, March, 2016 |
| NDOW-3-732 | Mosquito Mountains  | Washoe County | NV | 41.7637979 | -119.9205216 | 1866 | na | na | 267 | 2015 | NDOW Unpublished, March, 2016 |
| NDOW-3-733 | Mosquito Mountains  | Washoe County | NV | 41.7637542 | -119.9204715 | 1868 | na | na | 267 | 2015 | NDOW Unpublished, March, 2016 |
| NDOW-3-734 | Mosquito Mountains  | Washoe County | NV | 41.7636109 | -119.9204409 | 1868 | na | na | 270 | 2015 | NDOW Unpublished, March, 2016 |
| NDOW-3-735 | Mosquito Mountains  | Washoe County | NV | 41.7636136 | -119.9203328 | 1871 | na | na | 267 | 2015 | NDOW Unpublished, March, 2016 |
| NDOW-3-736 | Mosquito Mountains  | Washoe County | NV | 41.7636847 | -119.9203721 | 1870 | na | na | 267 | 2015 | NDOW Unpublished, March, 2016 |
| NDOW-3-737 | Mosquito Mountains  | Washoe County | NV | 41.7637830 | -119.9204006 | 1870 | na | na | 267 | 2015 | NDOW Unpublished, March, 2016 |
| NDOW-3-738 | Mosquito Mountains  | Washoe County | NV | 41.7638466 | -119.9203795 | 1870 | na | na | 267 | 2015 | NDOW Unpublished, March, 2016 |
| NDOW-3-739 | Mosquito Mountains  | Washoe County | NV | 41.7637569 | -119.9203634 | 1871 | na | na | 267 | 2015 | NDOW Unpublished, March, 2016 |
| NDOW-3-740 | Mosquito Mountains  | Washoe County | NV | 41.7639803 | -119.9204336 | 1869 | na | na | 270 | 2015 | NDOW Unpublished, March, 2016 |
| NDOW-3-741 | Mosquito Mountains  | Washoe County | NV | 41.7641951 | -119.9201307 | 1877 | na | na | 269 | 2015 | NDOW Unpublished, March, 2016 |
| NDOW-3-742 | Mosquito Mountains  | Washoe County | NV | 41.7642671 | -119.9201339 | 1877 | na | na | 269 | 2015 | NDOW Unpublished, March, 2016 |
| NDOW-3-743 | Mosquito Mountains  | Washoe County | NV | 41.7646618 | -119.9198391 | 1887 | na | na | 252 | 2015 | NDOW Unpublished, March, 2016 |
| NDOW-3-744 | Mosquito Mountains  | Washoe County | NV | 41.7648228 | -119.9198825 | 1887 | na | na | 250 | 2015 | NDOW Unpublished, March, 2016 |
| NDOW-3-745 | Mosquito Mountains  | Washoe County | NV | 41.7649893 | -119.9197096 | 1897 | na | na | 246 | 2015 | NDOW Unpublished, March, 2016 |
| NDOW-3-747 | Mosquito Mountains  | Washoe County | NV | 41.7669837 | -119.9195475 | 1890 | na | na | 268 | 2015 | NDOW Unpublished, March, 2016 |

|            |                    |               |    |            |              |      |    |    |     |      |                               |
|------------|--------------------|---------------|----|------------|--------------|------|----|----|-----|------|-------------------------------|
| NDOW-3-748 | Mosquito Mountains | Washoe County | NV | 41.7686023 | -119.9196450 | 1891 | na | na | 291 | 2015 | NDOW Unpublished, March, 2016 |
| NDOW-3-749 | Mosquito Mountains | Washoe County | NV | 41.7684724 | -119.9197955 | 1886 | na | na | 283 | 2015 | NDOW Unpublished, March, 2016 |
| NDOW-3-750 | Mosquito Mountains | Washoe County | NV | 41.7686634 | -119.9197199 | 1888 | na | na | 289 | 2015 | NDOW Unpublished, March, 2016 |
| NDOW-3-751 | Mosquito Mountains | Washoe County | NV | 41.7671621 | -119.9196157 | 1888 | na | na | 268 | 2015 | NDOW Unpublished, March, 2016 |
| NDOW-3-752 | Mosquito Mountains | Washoe County | NV | 41.7684112 | -119.9197205 | 1889 | na | na | 291 | 2015 | NDOW Unpublished, March, 2016 |
| NDOW-3-753 | Mosquito Mountains | Washoe County | NV | 41.7686166 | -119.9197900 | 1886 | na | na | 282 | 2015 | NDOW Unpublished, March, 2016 |
| NDOW-3-754 | Mosquito Mountains | Washoe County | NV | 41.7683362 | -119.9198374 | 1886 | na | na | 283 | 2015 | NDOW Unpublished, March, 2016 |
| NDOW-3-755 | Mosquito Mountains | Washoe County | NV | 41.7668278 | -119.9196607 | 1888 | na | na | 278 | 2015 | NDOW Unpublished, March, 2016 |
| NDOW-3-757 | Mosquito Mountains | Washoe County | NV | 41.7685555 | -119.9197150 | 1889 | na | na | 291 | 2015 | NDOW Unpublished, March, 2016 |
| NDOW-3-758 | Mosquito Mountains | Washoe County | NV | 41.7665515 | -119.9199000 | 1890 | na | na | 286 | 2015 | Jeffress et al. 2017          |
| NDOW-3-759 | Mosquito Mountains | Washoe County | NV | 41.7667087 | -119.9197400 | 1889 | na | na | 279 | 2015 | Jeffress et al. 2017          |
| NDOW-3-760 | Mosquito Mountains | Washoe County | NV | 41.7686405 | -119.9199100 | 1887 | na | na | 282 | 2015 | Jeffress et al. 2017          |
| NDOW-3-763 | Mosquito Mountains | Washoe County | NV | 41.7669531 | -119.9196904 | 1887 | na | na | 268 | 2015 | NDOW Unpublished, March, 2016 |
| NDOW-3-764 | Mosquito Mountains | Washoe County | NV | 41.7686637 | -119.9197079 | 1888 | na | na | 289 | 2015 | NDOW Unpublished, March, 2016 |
| NDOW-3-765 | Mosquito Mountains | Washoe County | NV | 41.7685497 | -119.9199400 | 1889 | na | na | 283 | 2015 | Jeffress et al. 2017          |
| NDOW-3-766 | Mosquito Mountains | Washoe County | NV | 41.7686594 | -119.9198800 | 1887 | na | na | 282 | 2015 | Jeffress et al. 2017          |
| NDOW-3-767 | Mosquito Mountains | Washoe County | NV | 41.7687155 | -119.9197945 | 1885 | na | na | 282 | 2015 | NDOW Unpublished, March, 2016 |
| NDOW-3-768 | Mosquito Mountains | Washoe County | NV | 41.7690139 | -119.9197479 | 1885 | na | na | 280 | 2015 | NDOW Unpublished, March, 2016 |
| NDOW-3-769 | Mosquito Mountains | Washoe County | NV | 41.7691104 | -119.9198485 | 1882 | na | na | 280 | 2015 | NDOW Unpublished, March, 2016 |
| NDOW-3-770 | Mosquito Mountains | Washoe County | NV | 41.7687593 | -119.9198446 | 1884 | na | na | 282 | 2015 | NDOW Unpublished, March, 2016 |
| NDOW-3-771 | Mosquito Mountains | Washoe County | NV | 41.7664637 | -119.9198126 | 1887 | na | na | 286 | 2015 | NDOW Unpublished, March, 2016 |
| NDOW-3-772 | Mosquito Mountains | Washoe County | NV | 41.7663612 | -119.9195914 | 1895 | na | na | 294 | 2015 | NDOW Unpublished, March, 2016 |
| NDOW-3-773 | Mosquito Mountains | Washoe County | NV | 41.7665992 | -119.9222727 | 1845 | na | na | 267 | 2015 | NDOW Unpublished, March, 2016 |
| NDOW-3-774 | Mosquito Mountains | Washoe County | NV | 41.7667646 | -119.9224967 | 1843 | na | na | 264 | 2015 | NDOW Unpublished, March, 2016 |
| NDOW-3-775 | Mosquito Mountains | Washoe County | NV | 41.7668253 | -119.9222348 | 1846 | na | na | 264 | 2015 | NDOW Unpublished, March, 2016 |
| NDOW-3-776 | Mosquito Mountains | Washoe County | NV | 41.7668596 | -119.9219477 | 1847 | na | na | 267 | 2015 | NDOW Unpublished, March, 2016 |
| NDOW-3-777 | Mosquito Mountains | Washoe County | NV | 41.7674044 | -119.9221288 | 1845 | na | na | 258 | 2015 | NDOW Unpublished, March, 2016 |
| NDOW-3-778 | Mosquito Mountains | Washoe County | NV | 41.7675981 | -119.9226549 | 1842 | na | na | 249 | 2015 | NDOW Unpublished, March, 2016 |
| NDOW-3-779 | Mosquito Mountains | Washoe County | NV | 41.7676222 | -119.9224154 | 1844 | na | na | 255 | 2015 | NDOW Unpublished, March, 2016 |
| NDOW-3-804 | Mosquito Mountains | Washoe County | NV | 41.6889369 | -119.9242670 | 1873 | na | na | 146 | 2015 | NDOW Unpublished, March, 2016 |
| NDOW-3-805 | Mosquito Mountains | Washoe County | NV | 41.6887669 | -119.9242233 | 1872 | na | na | 145 | 2015 | NDOW Unpublished, March, 2016 |
| NDOW-3-806 | Mosquito Mountains | Washoe County | NV | 41.6883979 | -119.9245670 | 1869 | na | na | 143 | 2015 | NDOW Unpublished, March, 2016 |
| NDOW-3-807 | Mosquito Mountains | Washoe County | NV | 41.6884424 | -119.9249415 | 1872 | na | na | 147 | 2015 | NDOW Unpublished, March, 2016 |
| NDOW-3-808 | Mosquito Mountains | Washoe County | NV | 41.6885606 | -119.9248988 | 1873 | na | na | 147 | 2015 | NDOW Unpublished, March, 2016 |
| NDOW-3-809 | Mosquito Mountains | Washoe County | NV | 41.6887501 | -119.9248833 | 1875 | na | na | 149 | 2015 | NDOW Unpublished, March, 2016 |
| NDOW-3-810 | Mosquito Mountains | Washoe County | NV | 41.6888044 | -119.9248738 | 1875 | na | na | 149 | 2015 | NDOW Unpublished, March, 2016 |
| NDOW-3-811 | Mosquito Mountains | Washoe County | NV | 41.6886693 | -119.9245192 | 1872 | na | na | 148 | 2015 | NDOW Unpublished, March, 2016 |
| NDOW-3-812 | Mosquito Mountains | Washoe County | NV | 41.7274625 | -119.9225406 | 1906 | na | na | 287 | 2015 | NDOW Unpublished, March, 2016 |
| NDOW-3-813 | Mosquito Mountains | Washoe County | NV | 41.7273139 | -119.9223656 | 1914 | na | na | 290 | 2015 | NDOW Unpublished, March, 2016 |
| NDOW-3-814 | Mosquito Mountains | Washoe County | NV | 41.7273055 | -119.9223411 | 1915 | na | na | 290 | 2015 | NDOW Unpublished, March, 2016 |
| NDOW-3-815 | Mosquito Mountains | Washoe County | NV | 41.7275927 | -119.9223782 | 1910 | na | na | 287 | 2015 | NDOW Unpublished, March, 2016 |
| NDOW-3-816 | Mosquito Mountains | Washoe County | NV | 41.7278801 | -119.9220546 | 1916 | na | na | 278 | 2015 | NDOW Unpublished, March, 2016 |
| NDOW-3-817 | Mosquito Mountains | Washoe County | NV | 41.7279003 | -119.9219714 | 1919 | na | na | 278 | 2015 | NDOW Unpublished, March, 2016 |
| NDOW-3-818 | Mosquito Mountains | Washoe County | NV | 41.7279391 | -119.9222136 | 1911 | na | na | 278 | 2015 | NDOW Unpublished, March, 2016 |
| NDOW-3-819 | Mosquito Mountains | Washoe County | NV | 41.7279577 | -119.9221904 | 1912 | na | na | 278 | 2015 | NDOW Unpublished, March, 2016 |
| NDOW-3-832 | Mosquito Mountains | Washoe County | NV | 41.6898884 | -119.9289800 | 1963 | na | na | 141 | 2015 | Jeffress et al. 2017          |
| NDOW-3-834 | Mosquito Mountains | Washoe County | NV | 41.6898754 | -119.9291400 | 1963 | na | na | 141 | 2015 | Jeffress et al. 2017          |
| NDOW-3-835 | Mosquito Mountains | Washoe County | NV | 41.6899111 | -119.9291500 | 1963 | na | na | 141 | 2015 | Jeffress et al. 2017          |
| NDOW-3-836 | Mosquito Mountains | Washoe County | NV | 41.6899461 | -119.9291900 | 1972 | na | na | 138 | 2015 | Jeffress et al. 2017          |

|            |                    |               |    |            |              |      |    |    |     |      |                               |
|------------|--------------------|---------------|----|------------|--------------|------|----|----|-----|------|-------------------------------|
| NDOW-3-837 | Mosquito Mountains | Washoe County | NV | 41.6899803 | -119.9292600 | 1972 | na | na | 138 | 2015 | Jeffress et al. 2017          |
| NDOW-3-838 | Mosquito Mountains | Washoe County | NV | 41.6898655 | -119.9291751 | 1973 | na | na | 138 | 2015 | NDOW Unpublished, March, 2016 |
| NDOW-3-839 | Mosquito Mountains | Washoe County | NV | 41.6896574 | -119.9292100 | 1961 | na | na | 143 | 2015 | Jeffress et al. 2017          |
| NDOW-3-840 | Mosquito Mountains | Washoe County | NV | 41.6896748 | -119.9292400 | 1961 | na | na | 143 | 2015 | Jeffress et al. 2017          |
| NDOW-3-841 | Mosquito Mountains | Washoe County | NV | 41.6894776 | -119.9295500 | 1969 | na | na | 139 | 2015 | Jeffress et al. 2017          |
| NDOW-3-842 | Mosquito Mountains | Washoe County | NV | 41.6894593 | -119.9295700 | 1969 | na | na | 139 | 2015 | Jeffress et al. 2017          |
| NDOW-3-843 | Mosquito Mountains | Washoe County | NV | 41.6887247 | -119.9301205 | 1967 | na | na | 130 | 2015 | NDOW Unpublished, March, 2016 |
| NDOW-3-844 | Mosquito Mountains | Washoe County | NV | 41.6887141 | -119.9301801 | 1969 | na | na | 130 | 2015 | NDOW Unpublished, March, 2016 |
| NDOW-3-845 | Mosquito Mountains | Washoe County | NV | 41.6887048 | -119.9301917 | 1969 | na | na | 130 | 2015 | NDOW Unpublished, March, 2016 |
| NDOW-3-846 | Mosquito Mountains | Washoe County | NV | 41.6884223 | -119.9303230 | 1964 | na | na | 130 | 2015 | NDOW Unpublished, March, 2016 |
| NDOW-3-847 | Mosquito Mountains | Washoe County | NV | 41.6884508 | -119.9302642 | 1964 | na | na | 127 | 2015 | NDOW Unpublished, March, 2016 |
| NDOW-3-848 | Mosquito Mountains | Washoe County | NV | 41.6883842 | -119.9304054 | 1964 | na | na | 130 | 2015 | NDOW Unpublished, March, 2016 |
| NDOW-3-849 | Mosquito Mountains | Washoe County | NV | 41.6883544 | -119.9305122 | 1964 | na | na | 130 | 2015 | NDOW Unpublished, March, 2016 |
| NDOW-3-850 | Mosquito Mountains | Washoe County | NV | 41.6881783 | -119.9307084 | 1964 | na | na | 134 | 2015 | NDOW Unpublished, March, 2016 |
| NDOW-3-851 | Mosquito Mountains | Washoe County | NV | 41.6880366 | -119.9309663 | 1969 | na | na | 139 | 2015 | NDOW Unpublished, March, 2016 |
| NDOW-3-852 | Mosquito Mountains | Washoe County | NV | 41.6879523 | -119.9310946 | 1969 | na | na | 139 | 2015 | NDOW Unpublished, March, 2016 |
| NDOW-3-853 | Mosquito Mountains | Washoe County | NV | 41.6872500 | -119.9317956 | 1964 | na | na | 136 | 2015 | NDOW Unpublished, March, 2016 |
| NDOW-3-855 | Hays Canyon Range  | Washoe County | NV | 41.6375618 | -119.9042701 | 2112 | na | na | 299 | 2015 | NDOW Unpublished, March, 2016 |
| NDOW-3-856 | Hays Canyon Range  | Washoe County | NV | 41.6489917 | -119.8949380 | 1992 | na | na | 295 | 2015 | NDOW Unpublished, March, 2016 |
| NDOW-3-857 | Hays Canyon Range  | Washoe County | NV | 41.6491095 | -119.8949073 | 1991 | na | na | 295 | 2015 | NDOW Unpublished, March, 2016 |
| NDOW-3-858 | Hays Canyon Range  | Washoe County | NV | 41.6374039 | -119.9037468 | 2111 | na | na | 159 | 2015 | NDOW Unpublished, March, 2016 |
| NDOW-3-859 | Hays Canyon Range  | Washoe County | NV | 41.6491117 | -119.8948233 | 1996 | na | na | 295 | 2015 | NDOW Unpublished, March, 2016 |
| NDOW-3-860 | Hays Canyon Range  | Washoe County | NV | 41.6490211 | -119.8948433 | 1997 | na | na | 295 | 2015 | NDOW Unpublished, March, 2016 |
| NDOW-3-861 | Hays Canyon Range  | Washoe County | NV | 41.6492727 | -119.8948665 | 1990 | na | na | 303 | 2015 | NDOW Unpublished, March, 2016 |
| NDOW-3-862 | Hays Canyon Range  | Washoe County | NV | 41.6373943 | -119.9037704 | 2111 | na | na | 159 | 2015 | NDOW Unpublished, March, 2016 |
| NDOW-3-863 | Hays Canyon Range  | Washoe County | NV | 41.6373882 | -119.9040102 | 2108 | na | na | 185 | 2015 | NDOW Unpublished, March, 2016 |
| NDOW-3-864 | Hays Canyon Range  | Washoe County | NV | 41.6379108 | -119.9043578 | 2105 | na | na | 338 | 2015 | NDOW Unpublished, March, 2016 |
| NDOW-3-865 | Hays Canyon Range  | Washoe County | NV | 41.6376654 | -119.9037346 | 2125 | na | na | 90  | 2015 | NDOW Unpublished, March, 2016 |
| NDOW-3-867 | Hays Canyon Range  | Washoe County | NV | 41.6373484 | -119.9038044 | 2109 | na | na | 159 | 2015 | NDOW Unpublished, March, 2016 |
| NDOW-3-868 | Hays Canyon Range  | Washoe County | NV | 41.6373487 | -119.9037924 | 2109 | na | na | 159 | 2015 | NDOW Unpublished, March, 2016 |
| NDOW-3-869 | Hays Canyon Range  | Washoe County | NV | 41.6489458 | -119.8949720 | 1992 | na | na | 295 | 2015 | NDOW Unpublished, March, 2016 |
| NDOW-3-870 | Hays Canyon Range  | Washoe County | NV | 41.6489641 | -119.8949608 | 1992 | na | na | 295 | 2015 | NDOW Unpublished, March, 2016 |
| NDOW-3-871 | Hays Canyon Range  | Washoe County | NV | 41.6489734 | -119.8949492 | 1992 | na | na | 295 | 2015 | NDOW Unpublished, March, 2016 |
| NDOW-3-872 | Hays Canyon Range  | Washoe County | NV | 41.6491986 | -119.8949473 | 1988 | na | na | 303 | 2015 | NDOW Unpublished, March, 2016 |
| NDOW-3-873 | Hays Canyon Range  | Washoe County | NV | 41.6373853 | -119.9037700 | 2110 | na | na | 159 | 2015 | NDOW Unpublished, March, 2016 |
| NDOW-3-874 | Hays Canyon Range  | Washoe County | NV | 41.6376405 | -119.9036500 | 2122 | na | na | 90  | 2015 | Jeffress et al. 2017          |
| NDOW-3-875 | Hays Canyon Range  | Washoe County | NV | 41.6489911 | -119.8949600 | 2008 | na | na | 295 | 2015 | Jeffress et al. 2017          |
| NDOW-3-876 | Hays Canyon Range  | Washoe County | NV | 41.6379108 | -119.9043600 | 2108 | na | na | 338 | 2015 | Jeffress et al. 2017          |
| NDOW-3-877 | Hays Canyon Range  | Washoe County | NV | 41.6377008 | -119.9037600 | 2122 | na | na | 90  | 2015 | Jeffress et al. 2017          |
| NDOW-3-878 | Hays Canyon Range  | Washoe County | NV | 41.6376561 | -119.9037500 | 2122 | na | na | 90  | 2015 | Jeffress et al. 2017          |
| NDOW-3-879 | Hays Canyon Range  | Washoe County | NV | 41.6376256 | -119.9035300 | 2114 | na | na | 102 | 2015 | Jeffress et al. 2017          |
| NDOW-3-881 | Hays Canyon Range  | Washoe County | NV | 41.6376828 | -119.9037600 | 2122 | na | na | 90  | 2015 | Jeffress et al. 2017          |
| NDOW-3-882 | Hays Canyon Range  | Washoe County | NV | 41.6376918 | -119.9037600 | 2122 | na | na | 90  | 2015 | Jeffress et al. 2017          |
| NDOW-3-884 | Hays Canyon Range  | Washoe County | NV | 41.6357114 | -119.9342000 | 2045 | na | na | 256 | 2015 | Jeffress et al. 2017          |
| NDOW-3-885 | Hays Canyon Range  | Washoe County | NV | 41.6356230 | -119.9341346 | 2033 | na | na | 255 | 2015 | NDOW Unpublished, March, 2016 |
| NDOW-3-886 | Hays Canyon Range  | Washoe County | NV | 41.6356847 | -119.9341854 | 2032 | na | na | 256 | 2015 | NDOW Unpublished, March, 2016 |
| NDOW-3-887 | Hays Canyon Range  | Washoe County | NV | 41.6356152 | -119.9340862 | 2035 | na | na | 255 | 2015 | NDOW Unpublished, March, 2016 |
| NDOW-3-924 | High Rock          | Washoe County | NV | 41.4514594 | -119.6301616 | 2083 | na | na | 164 | 2015 | NDOW Unpublished, March, 2016 |
| NDOW-3-925 | High Rock          | Washoe County | NV | 41.4515982 | -119.6299996 | 2086 | na | na | 152 | 2015 | NDOW Unpublished, March, 2016 |

|            |                     |               |    |            |              |      |    |    |     |      |                               |
|------------|---------------------|---------------|----|------------|--------------|------|----|----|-----|------|-------------------------------|
| NDOW-3-926 | High Rock           | Washoe County | NV | 41.4518371 | -119.6297938 | 2092 | na | na | 151 | 2015 | NDOW Unpublished, March, 2016 |
| NDOW-3-927 | High Rock           | Washoe County | NV | 41.4519077 | -119.6294615 | 2088 | na | na | 147 | 2015 | NDOW Unpublished, March, 2016 |
| NDOW-3-928 | High Rock           | Washoe County | NV | 41.4516165 | -119.6299884 | 2087 | na | na | 152 | 2015 | NDOW Unpublished, March, 2016 |
| NDOW-3-929 | High Rock           | Washoe County | NV | 41.4519072 | -119.6294854 | 2089 | na | na | 147 | 2015 | NDOW Unpublished, March, 2016 |
| NDOW-3-930 | High Rock           | Washoe County | NV | 41.4518349 | -119.6298895 | 2093 | na | na | 151 | 2015 | NDOW Unpublished, March, 2016 |
| NDOW-3-931 | High Rock           | Washoe County | NV | 41.4518284 | -119.6297800 | 2087 | na | na | 151 | 2015 | Jeffress et al. 2017          |
| NDOW-3-954 | High Rock           | Washoe County | NV | 41.4521910 | -119.6292800 | 2084 | na | na | 130 | 2015 | Jeffress et al. 2017          |
| NDOW-3-955 | High Rock           | Washoe County | NV | 41.4520910 | -119.6293300 | 2084 | na | na | 130 | 2015 | Jeffress et al. 2017          |
| NDOW-3-956 | High Rock           | Washoe County | NV | 41.4521425 | -119.6294351 | 2092 | na | na | 130 | 2015 | NDOW Unpublished, March, 2016 |
| NDOW-3-957 | High Rock           | Washoe County | NV | 41.4521054 | -119.6294815 | 2092 | na | na | 133 | 2015 | NDOW Unpublished, March, 2016 |
| NDOW-3-958 | High Rock           | Washoe County | NV | 41.4521185 | -119.6293024 | 2089 | na | na | 130 | 2015 | NDOW Unpublished, March, 2016 |
| NDOW-3-959 | High Rock           | Washoe County | NV | 41.4520915 | -119.6296964 | 2096 | na | na | 133 | 2015 | NDOW Unpublished, March, 2016 |
| NDOW-3-959 | High Rock           | Washoe County | NV | 41.4520915 | -119.6297000 | 2090 | na | na | 133 | 2015 | Jeffress et al. 2017          |
| NDOW-3-960 | High Rock           | Washoe County | NV | 41.4525455 | -119.6295352 | 2100 | na | na | 96  | 2015 | NDOW Unpublished, March, 2016 |
| NDOW-3-961 | High Rock           | Washoe County | NV | 41.4526625 | -119.6295399 | 2100 | na | na | 96  | 2015 | NDOW Unpublished, March, 2016 |
| NDOW-3-962 | High Rock           | Washoe County | NV | 41.4526292 | -119.6294188 | 2097 | na | na | 112 | 2015 | NDOW Unpublished, March, 2016 |
| NDOW-4-009 | Carson Range        | Rifle Peak    | NV | 39.2872055 | -119.9885428 | 2881 | na | na | 339 | 2015 | NDOW Unpublished, March, 2016 |
| NDOW-4-010 | Carson Range        | Mount Baldy   | NV | 39.2799410 | -119.9974371 | 2815 | na | na | 315 | 2015 | NDOW Unpublished, March, 2016 |
| NDOW-4-011 | Carson Range        | Mount Baldy   | NV | 39.2802891 | -119.9982634 | 2777 | na | na | 315 | 2015 | NDOW Unpublished, March, 2016 |
| NDOW-4-012 | Carson Range        | Mount Baldy   | NV | 39.2801808 | -119.9982703 | 2781 | na | na | 304 | 2015 | NDOW Unpublished, March, 2016 |
| NDOW-5-001 | East Humboldt Range | Elko County   | NV | 40.9002529 | -115.1194440 | 3334 | na | na | 75  | 2013 | NDOW Unpublished, March, 2016 |
| NDOW-5-002 | East Humboldt Range | Elko County   | NV | 40.8925576 | -115.1392598 | 2979 | na | na | 281 | 2013 | NDOW Unpublished, March, 2016 |
| NDOW-5-003 | East Humboldt Range | Elko County   | NV | 40.9161084 | -115.1162516 | 2997 | na | na | 163 | 2013 | NDOW Unpublished, March, 2016 |
| NDOW-5-004 | East Humboldt Range | Elko County   | NV | 40.8966971 | -115.1423608 | 2972 | na | na | 197 | 2013 | NDOW Unpublished, March, 2016 |
| NDOW-5-005 | East Humboldt Range | Elko County   | NV | 40.9271886 | -115.1201649 | 3166 | na | na | 54  | 2013 | NDOW Unpublished, March, 2016 |
| NDOW-5-006 | East Humboldt Range | Elko County   | NV | 40.8881682 | -115.1486053 | 3030 | na | na | 352 | 2013 | NDOW Unpublished, March, 2016 |
| NDOW-5-007 | East Humboldt Range | Elko County   | NV | 40.9239399 | -115.1192475 | 3235 | na | na | 11  | 2013 | NDOW Unpublished, March, 2016 |
| NDOW-5-008 | East Humboldt Range | Elko County   | NV | 40.8859496 | -115.1467563 | 3105 | na | na | 219 | 2013 | NDOW Unpublished, March, 2016 |
| NDOW-5-009 | East Humboldt Range | Elko County   | NV | 40.9231742 | -115.1192455 | 3272 | na | na | 16  | 2013 | NDOW Unpublished, March, 2016 |
| NDOW-5-010 | East Humboldt Range | Elko County   | NV | 40.8989095 | -115.1421445 | 2940 | na | na | 12  | 2013 | NDOW Unpublished, March, 2016 |
| NDOW-5-011 | East Humboldt Range | Elko County   | NV | 40.9309420 | -115.1238592 | 3139 | na | na | 51  | 2013 | NDOW Unpublished, March, 2016 |
| NDOW-5-012 | East Humboldt Range | Elko County   | NV | 40.8909231 | -115.1339878 | 3220 | na | na | 237 | 2013 | NDOW Unpublished, March, 2016 |
| NDOW-5-013 | East Humboldt Range | Elko County   | NV | 40.9089243 | -115.1192577 | 3116 | na | na | 325 | 2013 | NDOW Unpublished, March, 2016 |
| NDOW-5-014 | East Humboldt Range | Elko County   | NV | 40.9041403 | -115.1241778 | 3173 | na | na | 249 | 2014 | NDOW Unpublished, March, 2016 |
| NDOW-5-015 | East Humboldt Range | Elko County   | NV | 40.9147473 | -115.1557482 | 2933 | na | na | 333 | 2014 | NDOW Unpublished, March, 2016 |
| NDOW-5-016 | East Humboldt Range | Elko County   | NV | 40.9117839 | -115.1518173 | 3005 | na | na | 170 | 2014 | NDOW Unpublished, March, 2016 |
| NDOW-5-017 | East Humboldt Range | Elko County   | NV | 40.9118824 | -115.1495348 | 3027 | na | na | 97  | 2014 | NDOW Unpublished, March, 2016 |
| NDOW-5-018 | East Humboldt Range | Elko County   | NV | 40.9528401 | -115.1172630 | 3201 | na | na | 44  | 2014 | NDOW Unpublished, March, 2016 |
| NDOW-5-019 | East Humboldt Range | Elko County   | NV | 40.9569989 | -115.1077464 | 3136 | na | na | 299 | 2014 | NDOW Unpublished, March, 2016 |
| NDOW-5-020 | East Humboldt Range | Elko County   | NV | 40.9707375 | -115.1056781 | 3093 | na | na | 101 | 2014 | NDOW Unpublished, March, 2016 |
| NDOW-5-021 | East Humboldt Range | Elko County   | NV | 40.9822348 | -115.1053490 | 3116 | na | na | 182 | 2014 | NDOW Unpublished, March, 2016 |
| NDOW-5-022 | East Humboldt Range | Elko County   | NV | 40.9959482 | -115.1050395 | 3195 | na | na | 86  | 2014 | NDOW Unpublished, March, 2016 |
| NDOW-5-023 | East Humboldt Range | Elko County   | NV | 41.0118886 | -115.1015741 | 3044 | na | na | 162 | 2014 | NDOW Unpublished, March, 2016 |
| NDOW-5-024 | East Humboldt Range | Elko County   | NV | 41.0147639 | -115.1005996 | 3068 | na | na | 56  | 2014 | NDOW Unpublished, March, 2016 |
| NDOW-5-025 | East Humboldt Range | Elko County   | NV | 41.0198506 | -115.1015357 | 3081 | na | na | 130 | 2014 | NDOW Unpublished, March, 2016 |
| NDOW-5-026 | East Humboldt Range | Elko County   | NV | 41.0234714 | -115.1069980 | 3188 | na | na | 263 | 2014 | NDOW Unpublished, March, 2016 |
| NDOW-5-027 | East Humboldt Range | Elko County   | NV | 41.0248192 | -115.1056986 | 3200 | na | na | 58  | 2014 | NDOW Unpublished, March, 2016 |
| NDOW-5-028 | East Humboldt Range | Elko County   | NV | 41.0284536 | -115.1048688 | 3138 | na | na | 57  | 2014 | NDOW Unpublished, March, 2016 |
| NDOW-5-029 | East Humboldt Range | Elko County   | NV | 41.0347500 | -115.1059730 | 3023 | na | na | 98  | 2014 | NDOW Unpublished, March, 2016 |

|            |                      |                              |    |            |              |      |      |      |     |           |                               |
|------------|----------------------|------------------------------|----|------------|--------------|------|------|------|-----|-----------|-------------------------------|
| NDOW-5-030 | East Humboldt Range  | Elko County                  | NV | 41.0303662 | -115.0974034 | 2874 | na   | na   | 331 | 2014      | NDOW Unpublished, March, 2016 |
| NDOW-5-031 | East Humboldt Range  | Elko County                  | NV | 41.0319375 | -115.0921957 | 2875 | na   | na   | 46  | 2014      | NDOW Unpublished, March, 2016 |
| NDOW-5-032 | East Humboldt Range  | Elko County                  | NV | 41.0276294 | -115.1166799 | 2749 | na   | na   | 72  | 2014      | NDOW Unpublished, March, 2016 |
| NDOW-5-033 | East Humboldt Range  | Elko County                  | NV | 41.0230803 | -115.1139075 | 2991 | na   | na   | 300 | 2014      | NDOW Unpublished, March, 2016 |
| NDOW-5-034 | Ruby Mountains       | Island Lake                  | NV | 40.6142216 | -115.3820172 | 2949 | na   | na   | 356 | 2014      | NDOW Unpublished, March, 2016 |
| NDOW-5-035 | Ruby Mountains       | Island Lake                  | NV | 40.6141476 | -115.3825155 | 2959 | na   | na   | 15  | 2014      | NDOW Unpublished, March, 2016 |
| NDOW-5-036 | Ruby Mountains       | Island Lake                  | NV | 40.6141494 | -115.3826454 | 2959 | na   | na   | 15  | 2014      | NDOW Unpublished, March, 2016 |
| NDOW-5-038 | Carson Range         | Mt. Rose                     | NV | 39.3249360 | -119.9221234 | 2804 | na   | na   | 351 | 2014      | NDOW Unpublished, March, 2016 |
| NDOW-5-039 | Carson Range         | Mt. Rose                     | NV | 39.3317830 | -119.9246126 | 2777 | na   | na   | 141 | 2014      | NDOW Unpublished, March, 2016 |
| NDOW-5-040 | Ruby Mountains       | Favre Lake                   | NV | 40.5720056 | -115.4012040 | 2936 | na   | na   | 14  | 2014      | NDOW Unpublished, March, 2016 |
| NDOW-5-041 | Ruby Mountains       | Liberty Lake                 | NV | 40.5882570 | -115.3914938 | 3119 | na   | na   | 342 | 2014      | NDOW Unpublished, March, 2016 |
| NDOW-5-042 | Monitor Range        | Table Mountain               | NV | 38.8276730 | -116.5946165 | 3245 | na   | na   | 20  | 2014      | NDOW Unpublished, March, 2016 |
| NDOW-5-043 | Monitor Range        | Table Mountain               | NV | 38.8219787 | -116.5923103 | 3265 | na   | na   | 27  | 2014      | NDOW Unpublished, March, 2016 |
| NDOW-5-044 | Monitor Range        | Table Mountain               | NV | 38.7704326 | -116.5822092 | 3175 | na   | na   | 17  | 2014      | NDOW Unpublished, March, 2016 |
| NDOW-5-045 | Sweetwater Mountains | Sweetwater                   | NV | 38.5326437 | -119.2896801 | 2904 | na   | na   | 42  | 2014      | NDOW Unpublished, March, 2016 |
| NDOW-5-046 | Sweetwater Mountains | Sweetwater                   | NV | 38.5325336 | -119.2893210 | 2895 | na   | na   | 39  | 2014      | NDOW Unpublished, March, 2016 |
| NDOW-5-047 | Sweetwater Mountains | Sweetwater                   | NV | 38.5329226 | -119.2892415 | 2884 | na   | na   | 64  | 2014      | NDOW Unpublished, March, 2016 |
| NDOW-5-048 | Sweetwater Mountains | Sweetwater                   | NV | 38.5327773 | -119.2888354 | 2876 | na   | na   | 31  | 2014      | NDOW Unpublished, March, 2016 |
| NDOW-5-049 | Sweetwater Mountains | Sweetwater                   | NV | 38.5329162 | -119.2886448 | 2863 | na   | na   | 45  | 2014      | NDOW Unpublished, March, 2016 |
| NDOW-5-050 | Sweetwater Mountains | Sweetwater                   | NV | 38.5329997 | -119.2885213 | 2853 | na   | na   | 40  | 2014      | NDOW Unpublished, March, 2016 |
| NDOW-5-051 | Sweetwater Mountains | Sweetwater                   | NV | 38.5328154 | -119.2868865 | 2787 | na   | na   | 32  | 2014      | NDOW Unpublished, March, 2016 |
| NDOW-5-052 | Sweetwater Mountains | Sweetwater                   | NV | 38.5329650 | -119.2875336 | 2819 | na   | na   | 46  | 2014      | NDOW Unpublished, March, 2016 |
| NDOW-5-053 | Sweetwater Mountains | Sweetwater                   | NV | 38.5333742 | -119.2873401 | 2787 | na   | na   | 73  | 2014      | NDOW Unpublished, March, 2016 |
| NDOW-5-054 | Sweetwater Mountains | Sweetwater                   | NV | 38.5334861 | -119.2871486 | 2777 | na   | na   | 68  | 2014      | NDOW Unpublished, March, 2016 |
| NDOW-5-055 | Sweetwater Mountains | Sweetwater                   | NV | 38.5339535 | -119.2858213 | 2722 | na   | na   | 54  | 2014      | NDOW Unpublished, March, 2016 |
| NDOW-5-056 | Sweetwater Mountains | Sweetwater                   | NV | 38.5341640 | -119.2851970 | 2704 | na   | na   | 52  | 2014      | NDOW Unpublished, March, 2016 |
| NDOW-5-057 | Sweetwater Mountains | Sweetwater                   | NV | 38.5341998 | -119.2852096 | 2697 | na   | na   | 52  | 2014      | NDOW Unpublished, March, 2016 |
| NDOW-5-058 | Sweetwater Mountains | Sweetwater                   | NV | 38.5347949 | -119.2847237 | 2675 | na   | na   | 64  | 2014      | NDOW Unpublished, March, 2016 |
| NDOW-5-059 | Sweetwater Mountains | Sweetwater                   | NV | 38.5348399 | -119.2847251 | 2675 | na   | na   | 64  | 2014      | NDOW Unpublished, March, 2016 |
| NDOW-5-060 | Sweetwater Mountains | Sweetwater                   | NV | 38.5427428 | -119.2934423 | 2504 | na   | na   | 227 | 2014      | NDOW Unpublished, March, 2016 |
| NDOW-5-061 | Sweetwater Mountains | Sweetwater                   | NV | 38.5427831 | -119.2932255 | 2511 | na   | na   | 29  | 2014      | NDOW Unpublished, March, 2016 |
| NDOW-5-062 | Ruby Mountains       | Thomas Cyn                   | NV | 40.6208994 | -115.4029114 | 2769 | na   | na   | 276 | 2014      | NDOW Unpublished, March, 2016 |
| NDOW-5-063 | Ruby Mountains       | Thomas Cyn                   | NV | 40.6209451 | -115.4036078 | 2746 | na   | na   | 284 | 2014      | NDOW Unpublished, March, 2016 |
| NDOW-5-064 | Toiyabe Range        | Head of Ophir & Clear Creeks | NV | 38.9502009 | -117.3283699 | 2976 | na   | na   | 6   | 2014      | NDOW Unpublished, March, 2016 |
| NDOW-5-069 | Monitor Range        | Dobbin Summit                | NV | 38.9408046 | -116.5146787 | 2652 | na   | na   | 64  | 2014      | NDOW Unpublished, March, 2016 |
| NDOW-5-070 | Monitor Range        | Black Rock Mountain          | NV | 38.8854134 | -116.5328347 | 2771 | na   | na   | 329 | 2014      | NDOW Unpublished, March, 2016 |
| NDOW-5-071 | East Humboldt Range  | Boulder Canyon               | NV | 40.8879879 | -115.1452394 | 3027 | na   | na   | 63  | 2014      | NDOW Unpublished, March, 2016 |
| P001       | Hart Mountains       | Calderwood Ranch             | OR | 42.3800000 | -119.7620000 | 2000 | 1810 | 2199 | 125 | 2009-2011 | Collins & Bauman 2012         |
| P002       | Hart Mountains       | DeGarmo Cyn                  | OR | 42.4785000 | -119.7610000 | 2175 | 2037 | 2357 | 314 | 2009-2011 | Collins & Bauman 2012         |
| P003       | Hart Mountains       | Goat Cr                      | OR | 42.4130000 | -119.7630000 | 2203 | 2137 | 2272 | 167 | 2009-2011 | Collins & Bauman 2012         |
| P004       | Hart Mountains       | Hart Mtn                     | OR | 42.5485000 | -119.7090000 | 1973 | 1648 | 2174 | 216 | 2009-2011 | Collins & Bauman 2012         |
| P005       | Hart Mountains       | Warner Cr                    | OR | 42.3955000 | -119.7515000 | 1919 | 1866 | 2048 | 79  | 2009-2011 | Collins & Bauman 2012         |
| P006       | Hart Mountains       | Willow Cr                    | OR | 42.5390000 | -119.6995000 | 1946 | 1894 | 2037 | 75  | 2009-2011 | Collins & Bauman 2012         |
| P007       | Sheldon Plateau      | Blowout Mtn                  | NV | 41.7220000 | -119.2695000 | 2033 | 1924 | 2167 | 111 | 2009-2011 | Collins & Bauman 2012         |
| P008       | Sheldon Plateau      | Echo Cyn                     | NV | 41.8450000 | -119.2805000 | 1896 | 1842 | 1914 | 298 | 2009-2011 | Collins & Bauman 2012         |
| P009       | Sheldon Plateau      | Fish Cr                      | NV | 41.7990000 | -119.3710000 | 1897 | 1816 | 1998 | 264 | 2009-2011 | Collins & Bauman 2012         |
| P010       | Sheldon Plateau      | Fish Cr Mtn                  | NV | 41.7500000 | -119.3460000 | 2204 | 1998 | 2045 | 345 | 2009-2011 | Collins & Bauman 2012         |
| P011       | Sheldon Plateau      | Fish Cr Spring               | NV | 41.7580000 | -119.3850000 | 1942 | 1914 | 1953 | 171 | 2009-2011 | Collins & Bauman 2012         |
| P012       | Sheldon Plateau      | Horse Cyn                    | NV | 41.7735000 | -119.3515000 | 1856 | 1847 | 1877 | 353 | 2009-2011 | Collins & Bauman 2012         |

|      |                      |                            |    |            |              |      |      |             |         |           |                                                                                                        |
|------|----------------------|----------------------------|----|------------|--------------|------|------|-------------|---------|-----------|--------------------------------------------------------------------------------------------------------|
| P013 | Sheldon Plateau      | Mahogany Mtn               | NV | 41.6010000 | -119.2160000 | 1985 | 1903 | 2090        | 299     | 2009-2011 | Collins & Bauman 2012                                                                                  |
| P014 | Massacre Rim         | na                         | NV | 41.7555000 | -119.6945000 | 1868 | 1830 | 1926        | 317     | 2009-2011 | Collins & Bauman 2012                                                                                  |
| P015 | Bodie Mountains      | Bodie State Historic Pk    | CA | 38.2184450 | -119.0001270 | 2630 | 2515 | 2744        | diverse | 2010      | Nichols et al. 2016                                                                                    |
| P016 | Desatoya Range       | Toby Canyon                | NV | 39.3900000 | -117.7500000 | 2849 | 2551 | na          | 240     | 2008      | Beever et al. 2011, Wilkening 2007, Wilkening et al. 2011                                              |
| P017 | Ruby Mountains       | Long Creek                 | NV | 40.5400000 | -115.4700000 | 2323 | 2776 | na          | 46      | 2008      | Beever et al. 2011                                                                                     |
| P018 | Ruby Mountains       | Three Lakes                | NV | 40.5900000 | -115.3900000 | 3075 | 2948 | 3185        | 27      | 2008      | Beever et al. 2011, Wilkening 2007, Wilkening et al. 2011                                              |
| P019 | Ruby Mountains       | Thomas Creek               | NV | 40.6200000 | -115.4000000 | 2922 | 2686 | 3146        | 263     | 2008      | Beever et al. 2011, Wilkening 2007, Wilkening et al. 2011                                              |
| P020 | White Mountains      | Mustang Mountain           | NV | 37.9000000 | -118.3100000 | 3047 | 2773 | 3007        | 266     | 2008      | Beever et al. 2011, Wilkening 2007, Wilkening et al. 2011                                              |
| P021 | White Mountains      | Pinchot Creek              | NV | 37.9200000 | -118.2900000 | 2467 | 2704 | 2687        | 32      | 2008      | Wilkening 2007, Wilkening et al. 2011                                                                  |
| P022 | Toiyabe Range        | Arc Dome                   | NV | 38.8300000 | -117.3500000 | 3503 | 3285 | 3244, 3285  | 142     | 2008      | Beever et al. 2011, Wilkening 2007, Wilkening et al. 2011                                              |
| P023 | Toiyabe Range        | South Twin River           | NV | 38.8300000 | -117.3100000 | 2659 | 2494 | 2779        | 281     | 2008      | Beever et al. 2011, Wilkening 2007, Wilkening et al. 2011                                              |
| P024 | Toiyabe Range        | Mohawk Canyon              | NV | 38.9800000 | -117.3300000 | 2795 | 2437 | 2755        | 68      | 2008      | Beever et al. 2011, Wilkening 2007, Wilkening et al. 2011                                              |
| P025 | Toquima Range        | Mt Jefferson               | NV | 38.7500000 | -116.9200000 | 3401 | 2934 | na          | 160     | 2008      | Beever et al. 2011, Wilkening 2007, NB:longitude corrected from Beever et al. to fall in correct range |
| P026 | East Humboldt Range  | Steels Creek               | NV | 40.9000000 | -115.1100000 | 2858 | 2599 | 2954        | 3       | 2008      | Beever et al. 2011, Wilkening 2007, Wilkening et al. 2011                                              |
| P027 | Wassuk Mountains     | Big Indian Mountain        | NV | 38.4900000 | -118.7900000 | 2891 | 2527 | 3161        | 23      | 2008      | Beever et al. 2011, Wilkening 2007, Wilkening et al. 2011                                              |
| P028 | Steens Mountains     | Kiger Gorge                | OR | 42.7700000 | -118.5800000 | 2031 | 1951 | 2598        | 42      | 2008      | Beever et al. 2011, Wilkening et al. 2011                                                              |
| P029 | Hart Mountains       | Stockade, Warner, Goat Crs | NV | 42.4200000 | -119.7600000 | 2179 | 1872 | 2270        | 55      | 2008      | Beever et al. 2011, Wilkening 2007, Wilkening et al. 2011                                              |
| P030 | Glass Mountains      | Cougar Peak                | OR | 42.3100000 | -120.6300000 | 2248 | 1791 | 2222        | 35      | 2008      | Beever et al. , 2011, Wilkening et al. 2011                                                            |
| P031 | Warner Mountains     | Crane Mountain             | OR | 42.0800000 | -120.2400000 | 2378 | 2360 | 2530        | 121     | 2008      | Beever et al. 2011, Wilkening et al. 2011                                                              |
| P032 | Hays Canyon Range    | na                         | NV | 41.3300000 | -119.7900000 | 1975 | 1914 | 2136 (2256) | 235     | 2008      | Beever et al. 2008, 2011, Wilkening et al. 2011; Jeffress et al. 2015 (elev)                           |
| P054 | Bear River Mountains | Copenhagen Basin           | ID | 42.3221130 | -111.5649980 | 2569 | na   | na          | 144     | <2009     | Galbreath et al. 2009; Hafner & Smith 2010                                                             |
| P055 | Wasatch Range        | Cottonwood                 | UT | 40.6582740 | -111.6437030 | 2611 | na   | na          | 5       | <2009     | Galbreath et al. 2009; Hafner & Smith 2010                                                             |
| P056 | Ruby Mountains       | Liberty Lake               | NV | 40.5825556 | -115.3922222 | 3124 | na   | na          | 281     | <2009     | Galbreath et al. 2009; Hafner & Smith 2010                                                             |
| P057 | Ruby Mountains       | Liberty Lake               | NV | 40.5816667 | -115.3926944 | 3094 | na   | na          | 284     | <2009     | Galbreath et al. 2009; Hafner & Smith 2010                                                             |
| P058 | Ruby Mountains       | Lamoille Pass              | NV | 40.5870833 | -115.3898333 | 3212 | na   | na          | 16      | <2009     | Galbreath et al. 2009; Hafner & Smith 2010                                                             |
| P059 | Desatoya Range       | na                         | NV | 39.4160556 | -117.7624444 | 2461 | na   | na          | 253     | <2009     | Galbreath et al. 2009; Hafner & Smith 2010                                                             |
| P060 | Toiyabe Range        | Arc Dome                   | NV | 38.8370000 | -117.3498889 | 3263 | na   | na          | 88      | <2009     | Galbreath et al. 2009; Hafner & Smith 2010                                                             |
| P061 | Toiyabe Range        | Arc Dome                   | NV | 38.8773333 | -117.3534167 | 3196 | na   | na          | 118     | <2009     | Galbreath et al. 2009; Hafner & Smith 2010                                                             |
| P062 | Toiyabe Range        | Arc Dome                   | NV | 38.8769722 | -117.3496667 | 3122 | na   | na          | 355     | <2009     | Galbreath et al. 2009; Hafner & Smith 2010                                                             |
| P063 | Toiyabe Range        | Arc Dome                   | NV | 38.8773611 | -117.3493333 | 3116 | na   | na          | 356     | <2009     | Galbreath et al. 2009; Hafner & Smith 2010                                                             |
| P064 | Toquima Range        | Mt Jefferson               | NV | 38.7252222 | -116.9260833 | 2951 | na   | na          | 155     | <2009     | Galbreath et al. 2009; Hafner & Smith 2010                                                             |
| P065 | Toquima Range        | Mt Jefferson               | NV | 38.7254167 | -116.9262222 | 2966 | na   | na          | 157     | <2009     | Galbreath et al. 2009; Hafner & Smith 2010                                                             |
| P066 | Toquima Range        | Mt Jefferson               | NV | 38.7399167 | -116.9239444 | 3321 | na   | na          | 127     | <2009     | Galbreath et al. 2009; Hafner & Smith 2010                                                             |
| P067 | Toquima Range        | Mt Jefferson               | NV | 38.7400278 | -116.9239722 | 3322 | na   | na          | 123     | <2009     | Galbreath et al. 2009; Hafner & Smith 2010                                                             |
| P068 | Toquima Range        | Mt Jefferson               | NV | 38.7253889 | -116.9256944 | 2946 | na   | na          | 153     | <2009     | Galbreath et al. 2009; Hafner & Smith 2010                                                             |
| P069 | Toquima Range        | Mt Jefferson               | NV | 38.7261944 | -116.9254444 | 2979 | na   | na          | 109     | <2009     | Galbreath et al. 2009; Hafner & Smith 2010                                                             |
| P070 | Toquima Range        | Mt Jefferson               | NV | 38.7270833 | -116.9243056 | 2966 | na   | na          | 109     | <2009     | Galbreath et al. 2009; Hafner & Smith 2010                                                             |
| P071 | Uinta Mountains      | Oakley, Weber Canyon       | UT | 40.7647500 | -111.0161667 | 2699 | na   | na          | 159     | <2009     | Galbreath et al. 2009; Hafner & Smith 2010                                                             |
| P072 | Uinta Mountains      | Oakley, Weber Canyon       | UT | 40.7620833 | -111.0120000 | 2844 | na   | na          | 173     | <2009     | Galbreath et al. 2009; Hafner & Smith 2010                                                             |
| P073 | Uinta Mountains      | Oakley, Weber Canyon       | UT | 40.7568333 | -111.0387500 | 3148 | na   | na          | 168     | <2009     | Galbreath et al. 2009; Hafner & Smith 2010                                                             |
| P074 | Uinta Mountains      | Oakley, Weber Canyon       | UT | 40.7575556 | -111.0373056 | 3146 | na   | na          | 180     | <2009     | Galbreath et al. 2009; Hafner & Smith 2010                                                             |
| P075 | Uinta Mountains      | Oakley, Weber Canyon       | UT | 40.7576667 | -111.0421389 | 3063 | na   | na          | 147     | <2009     | Galbreath et al. 2009; Hafner & Smith 2010                                                             |
| P076 | Wasatch Plateau      | Gunnison                   | UT | 39.0626667 | -111.5198611 | 3295 | na   | na          | 164     | <2009     | Galbreath et al. 2009; Hafner & Smith 2010                                                             |
| P077 | Wasatch Plateau      | Gunnison                   | UT | 39.0633056 | -111.5189722 | 3265 | na   | na          | 159     | <2009     | Galbreath et al. 2009; Hafner & Smith 2010                                                             |
| P078 | Wasatch Plateau      | Gunnison                   | UT | 39.1099444 | -111.4697778 | 3209 | na   | na          | 189     | <2009     | Galbreath et al. 2009; Hafner & Smith 2010                                                             |
| P079 | Wasatch Plateau      | Gunnison                   | UT | 39.1118611 | -111.4711389 | 3218 | na   | na          | 187     | <2009     | Galbreath et al. 2009; Hafner & Smith 2010                                                             |
| P080 | Wasatch Plateau      | Gunnison                   | UT | 39.1147778 | -111.4731111 | 3215 | na   | na          | 187     | <2009     | Galbreath et al. 2009; Hafner & Smith 2010                                                             |
| P081 | Tushar Mountains     | Beaver, Delano Peak        | UT | 38.3878611 | -112.3999167 | 3477 | na   | na          | 184     | <2009     | Galbreath et al. 2009; Hafner & Smith 2010                                                             |
| P082 | Tushar Mountains     | Beaver, Delano Peak        | UT | 38.3820278 | -112.4009722 | 3379 | na   | na          | 45      | <2009     | Galbreath et al. 2009; Hafner & Smith 2010                                                             |

|      |                      |                               |    |            |              |      |    |    |     |       |                                            |
|------|----------------------|-------------------------------|----|------------|--------------|------|----|----|-----|-------|--------------------------------------------|
| P083 | Tushar Mountains     | Beaver, Delano Peak           | UT | 38.3832778 | -112.4002222 | 3414 | na | na | 99  | <2009 | Galbreath et al. 2009; Hafner & Smith 2010 |
| P084 | Tushar Mountains     | Beaver, Delano Peak           | UT | 38.3869444 | -112.4018333 | 3411 | na | na | 6   | <2009 | Galbreath et al. 2009; Hafner & Smith 2010 |
| P085 | Tushar Mountains     | Beaver, Delano Peak           | UT | 38.3872500 | -112.4028889 | 3419 | na | na | 182 | <2009 | Galbreath et al. 2009; Hafner & Smith 2010 |
| P086 | Sevier Plateau       | Monroe                        | UT | 38.5437222 | -112.0840278 | 2978 | na | na | 110 | <2009 | Galbreath et al. 2009; Hafner & Smith 2010 |
| P087 | Steens Mountains     | Steens Mountain               | OR | 42.6819444 | -118.5612222 | 2757 | na | na | 225 | <2009 | Galbreath et al. 2009; Hafner & Smith 2010 |
| P088 | Warner Mountains     | Warren Peak                   | CA | 41.3786389 | -120.2124167 | 2805 | na | na | 153 | <2009 | Galbreath et al. 2009; Hafner & Smith 2010 |
| P089 | Warner Mountains     | Warren Peak                   | CA | 41.3783056 | -120.2123056 | 2773 | na | na | 114 | <2009 | Galbreath et al. 2009; Hafner & Smith 2010 |
| P090 | Warner Mountains     | Warren Peak                   | CA | 41.3699167 | -120.2388333 | 2423 | na | na | 162 | <2009 | Galbreath et al. 2009; Hafner & Smith 2010 |
| P091 | Sierra Nevada        | Ebbetts Pass; just W of pass  | CA | 38.5458333 | -119.8161944 | 2729 | na | na | 146 | <2009 | Galbreath et al. 2009; Hafner & Smith 2010 |
| P092 | Sierra Nevada        | Ebbetts Pass; just W of pass  | CA | 38.5444444 | -119.8164444 | 2664 | na | na | 73  | <2009 | Galbreath et al. 2009; Hafner & Smith 2010 |
| P093 | Sierra Nevada        | Ebbetts Pass; just W of pass  | CA | 38.5445000 | -119.8166944 | 2679 | na | na | 190 | <2009 | Galbreath et al. 2009; Hafner & Smith 2010 |
| P094 | Sierra Nevada        | Onion Valley                  | CA | 36.7805278 | -118.3259722 | 2867 | na | na | 183 | <2009 | Galbreath et al. 2009; Hafner & Smith 2010 |
| P095 | Sierra Nevada        | Onion Valley                  | CA | 36.7804722 | -118.3264167 | 2852 | na | na | 151 | <2009 | Galbreath et al. 2009; Hafner & Smith 2010 |
| P096 | Sierra Nevada        | Onion Valley                  | CA | 36.7803611 | -118.3264167 | 2851 | na | na | 346 | <2009 | Galbreath et al. 2009; Hafner & Smith 2010 |
| P097 | Sierra Nevada        | Onion Valley                  | CA | 36.7801389 | -118.3264167 | 2830 | na | na | 163 | <2009 | Galbreath et al. 2009; Hafner & Smith 2010 |
| P098 | White Mountains      | Campito Mtn                   | CA | 37.4913056 | -118.1845556 | 3178 | na | na | 337 | <2009 | Galbreath et al. 2009; Hafner & Smith 2010 |
| P106 | Toquima Range        | Pine Creek                    | NV | 38.7735333 | -116.9334500 | 3292 | na | na | 351 | 2015  | Millar et al. 2016                         |
| P107 | Sierra Nevada        | Carson Pass, Woodfords        | CA | 38.7645333 | -119.8488000 | 1837 | na | na | 222 | 2012  | Millar et al. 2016                         |
| P108 | Zunnamed Mountains   | Monitor Pass, Levithan Pk     | CA | 38.6809333 | -119.6118333 | 2686 | na | na | 203 | 2013  | Millar et al. 2016                         |
| P109 | Sweetwater Mountains | Ferris Cyn                    | CA | 38.4251500 | -119.2647167 | 3136 | na | na | 346 | 2015  | Millar et al. 2016                         |
| P110 | Sweetwater Mountains | Lower Star City               | CA | 38.4185000 | -119.2409167 | 2602 | na | na | 154 | 2015  | Millar et al. 2016                         |
| P111 | Sweetwater Mountains | Upper Star City               | CA | 38.4105333 | -119.2554833 | 2836 | na | na | 227 | 2015  | Millar et al. 2016                         |
| P112 | Sweetwater Mountains | Electonic Site                | CA | 38.3833167 | -119.3722333 | 2950 | na | na | 143 | 2015  | Millar et al. 2016                         |
| P113 | Sierra Nevada        | Green Cr Cyn, Moraine         | CA | 38.1202667 | -119.2728833 | 2665 | na | na | 75  | 2014  | Millar et al. 2016                         |
| P114 | Sierra Nevada        | Green Cr Cyn, Main Talus      | CA | 38.1003500 | -119.2938667 | 2586 | na | na | 54  | 2014  | Millar et al. 2016                         |
| P115 | Sierra Nevada        | Benjamin Buttes               | CA | 38.0818833 | -119.2320167 | 2801 | na | na | 183 | 2016  | Millar et al. 2016                         |
| P116 | Sierra Nevada        | Virginia Lks Cyn, Moat Lk     | CA | 38.0552000 | -119.2737500 | 3190 | na | na | 210 | 2016  | Millar et al. 2016                         |
| P117 | Sierra Nevada        | Virginia Lks Cyn, Moat Trail  | CA | 38.0551500 | -119.2753833 | 3182 | na | na | 59  | 2016  | Millar et al. 2016                         |
| P118 | Sierra Nevada        | Virginia Lks Cyn, Blue Lk Low | CA | 38.0525000 | -119.2725667 | 3059 | na | na | 351 | 2016  | Millar et al. 2016                         |
| P119 | Sierra Nevada        | Virginia Lks Cyn, Main Talus  | CA | 38.0454167 | -119.2779167 | 3158 | na | na | 319 | 2016  | Millar et al. 2016                         |
| P120 | Sierra Nevada        | Lundy Main Talus S            | CA | 38.0349833 | -119.2138833 | 2371 | na | na | 143 | 2016  | Millar et al. 2016                         |
| P121 | Sierra Nevada        | Lundy, Lake Cyn Trail         | CA | 38.0286833 | -119.2254500 | 2387 | na | na | 188 | 2016  | Millar et al. 2016                         |
| P122 | Sierra Nevada        | Lundy Main Talus N            | CA | 38.0247333 | -119.2403000 | 2401 | na | na | 311 | 2016  | Millar et al. 2016                         |
| P123 | Sierra Nevada        | Warren Fork Cyn, Main Talus   | CA | 37.9843500 | -119.2392000 | 3206 | na | na | 250 | 2016  | Millar et al. 2016                         |
| P124 | Sierra Nevada        | Saddlebag Lk, Main Talus      | CA | 37.9839333 | -119.2821500 | 3119 | na | na | 28  | 2016  | Millar et al. 2016                         |
| P125 | Sierra Nevada        | Greenstone Lk, Main Talus     | CA | 37.9776000 | -119.2917833 | 3093 | na | na | 93  | 2016  | Millar et al. 2016                         |
| P126 | Sierra Nevada        | Warren Fork Cyn, E Fork       | CA | 37.9764333 | -119.2455000 | 3064 | na | na | 344 | 2016  | Millar et al. 2016                         |
| P127 | Sierra Nevada        | Saddlebag Lk, Trail E         | CA | 37.9719500 | -119.2670000 | 3099 | na | na | 352 | 2016  | Millar et al. 2016                         |
| P128 | Sierra Nevada        | Warren Fork Cyn, Confluence   | CA | 37.9707000 | -119.2454667 | 3005 | na | na | 159 | 2016  | Millar et al. 2016                         |
| P129 | Sierra Nevada        | Saddlebag Lk, Trail W         | CA | 37.9696500 | -119.2747333 | 3091 | na | na | 126 | 2016  | Millar et al. 2016                         |
| P130 | Sierra Nevada        | Warren Fork Crn, Gardisky C   | CA | 37.9586667 | -119.2432500 | 2922 | na | na | 149 | 2016  | Millar et al. 2016                         |
| P131 | Sierra Nevada        | Ellery Lake                   | CA | 37.9411000 | -119.2427167 | 2944 | na | na | 122 | 2016  | Millar et al. 2016                         |
| P132 | Sierra Nevada        | Lee Vining Cyn, S             | CA | 37.9406833 | -119.1841500 | 2305 | na | na | 208 | 2016  | Millar et al. 2016                         |
| P133 | Sierra Nevada        | Lee Vining Cyn, Main Talus    | CA | 37.9298000 | -119.1821500 | 2319 | na | na | 209 | 2016  | Millar et al. 2016                         |
| P134 | Sierra Nevada        | Gibbs Cyn                     | CA | 37.9024667 | -119.1723667 | 2837 | na | na | 10  | 2016  | Millar et al. 2016                         |
| P136 | Mono Craters         | Mono Craters Pumice Mine      | CA | 37.8429333 | -119.0070833 | 2573 | na | na | 182 | 2016  | Millar et al. 2016                         |
| P137 | Sierra Nevada        | Obsidian Dome                 | CA | 37.7502500 | -119.0218500 | 2491 | na | na | 153 | 2016  | Millar et al. 2016                         |
| P138 | White Mountains      | County Line Hill              | CA | 37.4846333 | -118.1829167 | 3207 | na | na | 325 | 2016  | Millar et al. 2016                         |
| P139 | White Mountains      | Roberts Ranch                 | CA | 37.4329667 | -118.1011333 | 2466 | na | na | 241 | 2016  | Millar et al. 2016                         |

|      |                      |                     |    |            |              |      |    |    |     |       |                                            |
|------|----------------------|---------------------|----|------------|--------------|------|----|----|-----|-------|--------------------------------------------|
| P140 | Sierra Nevada        | Gibbs Cyn           | CA | 37.8972800 | -119.1918500 | 3091 | na | na | 255 | 2016  | Millar et al. 2015 (QI)                    |
| P143 | Sierra Nevada        | Virginia Lakes Cyn  | CA | 38.0438100 | -119.2817700 | 3190 | na | na | 203 | 2016  | Millar et al. 2015 (QI)                    |
| P144 | Sierra Nevada        | Greenstone Lk       | CA | 37.9773000 | -119.2922900 | 3093 | na | na | 149 | 2016  | Millar et al. 2015 (QI)                    |
| P145 | Madeline Uplands     | McDonald Peak       | CA | 40.9387000 | -120.4111000 | 2291 | na | na | 232 | 2012  | Millar et al. 2013 WNAN                    |
| P146 | Madeline Uplands     | McDonald Peak       | CA | 40.9295000 | -120.4000000 | 2003 | na | na | 184 | 2012  | Millar et al. 2013 WNAN                    |
| P147 | Madeline Uplands     | McDonald Peak       | CA | 40.9248000 | -120.3873000 | 1848 | na | na | 297 | 2012  | Millar et al. 2013 WNAN                    |
| P148 | Madeline Uplands     | Observation Peak    | CA | 40.7736000 | -120.1709000 | 2411 | na | na | 200 | 2012  | Millar et al. 2013 WNAN                    |
| P149 | Madeline Uplands     | Observation Peak    | CA | 40.7729000 | -120.1714000 | 2384 | na | na | 159 | 2012  | Millar et al. 2013 WNAN                    |
| P150 | Madeline Uplands     | Observation Peak    | CA | 40.7728000 | -120.1713000 | 2388 | na | na | 140 | 2012  | Millar et al. 2013 WNAN                    |
| P151 | Zunnamed Mountains   | Monitor Plateau N   | CA | 38.6816000 | -119.6298000 | 2539 | na | na | 241 | 2013  | Millar et al. 2013 WNAN                    |
| P152 | Zunnamed Mountains   | Monitor Plateau S   | CA | 38.6661000 | -119.6260000 | 2539 | na | na | 27  | 2013  | Millar et al. 2013 WNAN                    |
| P153 | Zunnamed Mountains   | Leviathan Peak      | CA | 38.6809000 | -119.6118000 | 2687 | na | na | 153 | 2013  | Millar et al. 2013 WNAN                    |
| P154 | Zunnamed Mountains   | Leviathan Peak      | CA | 38.6827730 | -119.6135370 | 2665 | na | na | 210 | 2013  | Millar et al. 2013 WNAN                    |
| P155 | Wassuk Mountains     | Mt. Grant           | NV | 38.5830000 | -118.7899000 | 3018 | na | na | 100 | 2014  | Millar et al. 2013 WNAN                    |
| P156 | Wassuk Mountains     | Mt. Grant           | NV | 38.5722000 | -118.7970000 | 3148 | na | na | 319 | 2014  | Millar et al. 2013 WNAN                    |
| P158 | Wassuk Mountains     | Mt. Grant           | NV | 38.5679000 | -118.7918000 | 3392 | na | na | 73  | 2014  | Millar et al. 2013 WNAN                    |
| P159 | Wassuk Mountains     | Mt. Grant           | NV | 38.5671000 | -118.8000000 | 3159 | na | na | 163 | 2014  | Millar et al. 2013 WNAN                    |
| P160 | Wassuk Mountains     | Mt. Grant           | NV | 38.5643000 | -118.7959000 | 3171 | na | na | 163 | 2014  | Millar et al. 2013 WNAN                    |
| P161 | Wassuk Mountains     | Mt. Grant           | NV | 38.5638000 | -118.7849000 | 3321 | na | na | 59  | 2014  | Millar et al. 2013 WNAN                    |
| P162 | Wassuk Mountains     | Mt. Grant           | NV | 38.5633000 | -118.8002000 | 3125 | na | na | 208 | 2014  | Millar et al. 2013 WNAN                    |
| P163 | Wassuk Mountains     | Mt. Grant           | NV | 38.5609000 | -118.7966000 | 3141 | na | na | 353 | 2014  | Millar et al. 2013 WNAN                    |
| P164 | Wassuk Mountains     | Mt. Grant           | NV | 38.5596000 | -118.7940000 | 3159 | na | na | 190 | 2014  | Millar et al. 2013 WNAN                    |
| P165 | Wassuk Mountains     | Mt. Grant           | NV | 38.5504000 | -118.7959000 | 2998 | na | na | 94  | 2014  | Millar et al. 2013 WNAN                    |
| P166 | Wassuk Mountains     | Big Indian Mountain | NV | 38.4872000 | -118.7989000 | 3028 | na | na | 280 | 2014  | Millar et al. 2013 WNAN                    |
| P167 | Wassuk Mountains     | Big Indian Mountain | NV | 38.4879000 | -118.7987000 | 3063 | na | na | 179 | 2014  | Millar et al. 2013 WNAN                    |
| P168 | Wassuk Mountains     | Big Indian Mountain | NV | 38.4872000 | -118.7924000 | 2982 | na | na | 143 | 2014  | Millar et al. 2013 WNAN                    |
| P169 | Sweetwater Mountains | Lower Star City     | CA | 38.4203000 | -119.2359000 | 2603 | na | na | 174 | 2016  | Millar et al. 2013 WNAN                    |
| P170 | Sweetwater Mountains | Upper Star City     | CA | 38.4105000 | -119.2555000 | 2833 | na | na | 183 | 2016  | Millar et al. 2013 WNAN                    |
| P171 | Bodie Mountains      | New York Hill       | CA | 38.3597000 | -119.1267000 | 2582 | na | na | 158 | 2011  | Millar et al. 2013 WNAN                    |
| P172 | Bodie Mountains      | Masonie Mtn.        | CA | 38.3481000 | -119.1277000 | 2761 | na | na | 183 | 2016  | Millar et al. 2013 WNAN                    |
| P173 | Bodie Mountains      | Masonie Mtn.        | CA | 38.3466000 | -119.1444000 | 2687 | na | na | 248 | 2016  | Millar et al. 2013 WNAN                    |
| P174 | Sierra Nevada        | Green Creek         | CA | 38.1203000 | -119.2729000 | 2621 | na | na | 251 | 2016  | Millar et al. 2013 WNAN                    |
| P175 | Sierra Nevada        | Benjamin Butte      | CA | 38.0819000 | -119.2320000 | 2778 | na | na | 276 | 2016  | Millar et al. 2013 WNAN                    |
| P176 | Sierra Nevada        | Lundy Canyon        | CA | 38.0350000 | -119.2139000 | 2371 | na | na | 206 | 2016  | Millar et al. 2013 WNAN                    |
| P177 | Sierra Nevada        | Lundy Canyon        | CA | 38.0287000 | -119.2255000 | 2387 | na | na | 337 | 2016  | Millar et al. 2013 WNAN                    |
| P178 | Sierra Nevada        | Lee Vining Canyon   | CA | 37.9298000 | -119.1822000 | 2319 | na | na | 116 | 2016  | Millar et al. 2013 WNAN                    |
| P179 | Sierra Nevada        | Lee Vining Canyon   | CA | 37.9406000 | -119.1842000 | 2305 | na | na | 150 | 2016  | Millar et al. 2013 WNAN                    |
| P180 | Sierra Nevada        | Gibbs Canyon        | CA | 37.9025000 | -119.1724000 | 2837 | na | na | 33  | 2016  | Millar et al. 2013 WNAN                    |
| P181 | Inyo Craters         | Obsidian Dome       | CA | 37.7503000 | -119.0219000 | 2491 | na | na | 156 | 2016  | Millar et al. 2013 WNAN                    |
| P182 | Inyo Craters         | Little Glass Flow   | CA | 37.7480000 | -119.0257000 | 2511 | na | na | 122 | 2011  | Millar et al. 2013 WNAN                    |
| P183 | Mono Craters         | N Coulee            | CA | 37.9111000 | -119.0272000 | 2292 | na | na | 191 | 2011  | Millar et al. 2013 WNAN                    |
| P184 | Mono Craters         | Pumice Mine         | CA | 37.8431000 | -119.0043000 | 2573 | na | na | 47  | 2016  | Millar et al. 2013 WNAN                    |
| P185 | Mono Craters         | Pumice Mine         | CA | 37.8429000 | -119.0071000 | 2572 | na | na | 175 | 2016  | Millar et al. 2013 WNAN                    |
| P186 | White Mountains      | Wyman Canyon        | CA | 37.4419000 | -118.1298000 | 2854 | na | na | 35  | 2016  | Millar et al. 2013 WNAN                    |
| P187 | White Mountains      | Wyman Canyon        | CA | 37.4374000 | -118.1510000 | 2709 | na | na | 10  | 2016  | Millar et al. 2013 WNAN                    |
| P188 | White Mountains      | Wyman Canyon        | CA | 37.4367000 | -118.1411000 | 2668 | na | na | 5   | 2016  | Millar et al. 2013 WNAN                    |
| P189 | White Mountains      | Wyman Canyon        | CA | 37.4347000 | -118.1305000 | 2627 | na | na | 145 | 2016  | Millar et al. 2013 WNAN                    |
| P190 | White Mountains      | Wyman Canyon        | CA | 37.4330000 | -118.1011000 | 2466 | na | na | 98  | 2016  | Millar et al. 2013 WNAN                    |
| P194 | Sierra Nevada        | Carpenter Ridge     | CA | 39.4170000 | -120.3180000 | 2617 | na | na | 20  | <2013 | Stewart et al. 2015, Stewart & Wright 2012 |



|      |                      |                               |    |                |                  |      |      |      |         |              |                                            |
|------|----------------------|-------------------------------|----|----------------|------------------|------|------|------|---------|--------------|--------------------------------------------|
| P195 | Sierra Nevada        | E Donner Pass                 | CA | 39.3170000     | -120.3180000     | 2069 | na   | na   | 220     | <2013        | Stewart et al. 2015, Stewart & Wright 2012 |
| P196 | Sierra Nevada        | E side Ward Pk                | CA | 39.1470000     | -120.2390000     | 2476 | na   | na   | 306     | <2013        | Stewart et al. 2015, Stewart & Wright 2012 |
| P197 | Sierra Nevada        | E side Rubicon Pk             | CA | 38.9890000     | -120.1270000     | 2471 | na   | na   | 69      | <2013        | Stewart et al. 2015                        |
| P198 | Sierra Nevada        | Eagle Falls                   | CA | 38.9540000     | -120.1140000     | 2119 | na   | na   | 339     | <2013        | Stewart et al. 2015, Stewart & Wright 2012 |
| P199 | Sierra Nevada        | Lower Velma Lk                | CA | 38.9410000     | -120.1460000     | 2408 | na   | na   | 186     | <2013        | Stewart et al. 2015, Stewart & Wright 2012 |
| P200 | Sierra Nevada        | Gilmore Lk                    | CA | 38.8970000     | -120.1180000     | 2545 | na   | na   | 341     | <2013        | Stewart et al. 2015, Stewart & Wright 2012 |
| P201 | Sierra Nevada        | Heather Lk                    | CA | 38.8770000     | -120.1380000     | 2420 | na   | na   | 311     | <2013        | Stewart et al. 2015, Stewart & Wright 2012 |
| P202 | Sierra Nevada        | Below Heather Lk              | CA | 38.8690000     | -120.1210000     | 2380 | na   | na   | 197     | <2013        | Stewart et al. 2015, Stewart & Wright 2012 |
| P203 | Sierra Nevada        | Lucille Lk                    | CA | 38.8610000     | -120.1120000     | 2493 | na   | na   | 189     | <2013        | Stewart et al. 2015, Stewart & Wright 2012 |
| P204 | Sierra Nevada        | Angora Saddle                 | CA | 38.8580000     | -120.0750000     | 2695 | na   | na   | 57      | <2013        | Stewart et al. 2015, Stewart & Wright 2012 |
| P205 | Sierra Nevada        | S Echo Lk                     | CA | 38.8350000     | -120.0600000     | 2379 | na   | na   | 267     | <2013        | Stewart et al. 2015, Stewart & Wright 2012 |
| P206 | Sierra Nevada        | Crater Lk                     | CA | 38.7230000     | -119.9760000     | 2620 | na   | na   | 205     | <2013        | Stewart et al. 2015, Stewart & Wright 2012 |
| P207 | Sweetwater Mountains | Mouth of Sweetwater Cyn       | CA | 38.4810000     | -119.2550000     | 2416 | na   | na   | 145     | <2013        | Stewart et al. 2015                        |
| P208 | Sweetwater Mountains | Sweetwater Cyn                | CA | 38.4600000     | -119.2820000     | 2656 | na   | na   | 98      | <2013        | Stewart et al. 2015                        |
| P209 | Bodie Mountains      | Masonic                       | CA | 38.3580000     | -119.1260000     | 2628 | na   | na   | 15      | <2013        | Stewart et al. 2015                        |
| P210 | Bodie Mountains      | N Bodie                       | CA | 38.2160000     | -119.0010000     | 2691 | na   | na   | 206     | <2013        | Stewart et al. 2015                        |
| P211 | Sierra Nevada        | Above Walker Lk               | CA | 37.8650000     | -119.1800000     | 2609 | na   | na   | 181     | <2013        | Stewart et al. 2015                        |
| P212 | Sierra Nevada        | Lower Sardine Lk              | CA | 37.8620000     | -119.1960000     | 2930 | na   | na   | 20      | <2013        | Stewart et al. 2015                        |
| P213 | Mono Craters         | Pumice Mine                   | CA | 37.8430000     | -119.0050000     | 2563 | na   | na   | 220     | <2013        | Stewart et al. 2015                        |
| P214 | Sierra Nevada        | Grant Lk                      | CA | 37.8030000     | -119.1110000     | 2210 | na   | na   | 306     | <2013        | Stewart et al. 2015                        |
| P215 | Sierra Nevada        | Silver LK                     | CA | 37.7780000     | -119.1300000     | 2234 | na   | na   | 69      | <2013        | Stewart et al. 2015                        |
| P216 | Sierra Nevada        | Pine City                     | CA | 37.6150000     | -118.9970000     | 2690 | na   | na   | 339     | <2013        | Stewart et al. 2015                        |
| P217 | Sierra Nevada        | Big Prospector Mdw            | CA | 37.4990000     | -118.1800000     | 3192 | na   | na   | 186     | <2013        | Stewart et al. 2015                        |
| P218 | Sierra Nevada        | Big Pine                      | CA | 37.1230000     | -118.4370000     | 2390 | na   | na   | 341     | <2013        | Stewart et al. 2015                        |
| P219 | Sierra Nevada        | Sam Mack Mdw                  | CA | 37.1190000     | -118.5050000     | 3368 | na   | na   | 311     | <2013        | Stewart et al. 2015                        |
| P226 | Cascade Range        | Eagle Lk, Papoose Mdw         | CA | na             | na               | 1646 | na   | na   | na      | 2010         | Massing 2012                               |
| P227 | Cascade Range        | Mahogany Pk                   | CA | na             | na               | 1676 | na   | na   | na      | 2010         | Massing 2012                               |
| P228 | Cascade Range        | Gallatin Pk                   | CA | na             | na               | 1631 | na   | na   | na      | 2010         | Massing 2012                               |
| P229 | Sierra Nevada        | Loch Leven, Piute Lk          | CA | 37.217--37.233 | 118.650--118.667 | 3340 | 3291 | 3389 | na      | 2010         | Massing 2012                               |
| P230 | Sierra Nevada        | Aspendell                     | CA | 37.217--37.250 | 118.567--118.583 | 2664 | 2493 | 2835 | N-NE    | 2010         | Massing 2012                               |
| P231 | Sierra Nevada        | Lee Vining Cyn                | CA | na             | na               | na   | na   | na   | ENE-NNW | <2008        | Moritz et al. 2008                         |
| P233 | Sierra Nevada        | multiple sites mapped         | CA | na             | na               | na   | na   | na   | na      | <2011        | Rowe et al. 2014                           |
| P234 | Cascade/Warner Mtns  | multiple sites mapped         | CA | na             | na               | na   | na   | na   | na      | <2011        | Rowe et al. 2014                           |
| P237 | Fish Lake Plateau    | Mt Marvine                    | UT | 38.6630650     | -111.6613530     | 2894 | na   | na   | 260     | <2009        | Galbreath et al. 2009; Hafner & Smith 2010 |
| P238 | Markagunt Plateau    | Horse Valley Peak             | UT | 37.7642150     | -112.7990860     | 2325 | na   | na   | 17      | <2009        | Galbreath et al. 2009; Hafner & Smith 2010 |
| P244 | Ruby Mountains       | SW of Ruby Valley Post Office | NV | 40.4000000     | -115.5100000     | 3200 | 2774 | na   | 8       | 2014 or 2015 | Beever et al. 2016                         |
| P245 | Warner Mountains     | Fandango Pk                   | CA | 41.8600000     | -120.2400000     | 2338 | 2150 | na   | 197     | 2014 or 2015 | Beever et al. 2016                         |
| P246 | Warner Mountains     | Highgrade Springs aread       | CA | 41.9500000     | -120.2300000     | 2326 | 2370 | na   | 356     | 2014 or 2015 | Beever et al. 2016                         |
| P247 | Markagunt Plateau    | Cedar Breaks Nat'l Monument   | UT | na             | na               | na   | 3074 | 3102 | na      | 2014 or 2015 | Beever et al. 2016                         |
| P248 | Markagunt Plateau    | Dixie National Forest         | UT | na             | na               | na   | 2702 | 3371 | na      | 2014 or 2015 | Beever et al. 2016                         |
| P249 | Bodie Mountains      | W Masonic Mountain            | CA | 38.3443000     | -119.1459000     | 2700 | na   | na   | 310     | 2015         | Nichols et al. 2016                        |

#### Footnotes:

<sup>a</sup> An aspect of -1 indicates flat ground.

<sup>u</sup> Most recent date surveyed for sites with known prior surveys.

<sup>c</sup> Accession date is given for public natural diversity databases

<sup>u</sup> Same coordinates and survey dates are indicated in Beever et al. 2016 as extirpated and extant

na, not available
