# Supplementary material
Source: publisher figshare collection journal article supplement (https://tandf.figshare.com/articles/dataset/_/6203678)
Supplement: Supplementary file 3 [file 1]

# Appendix 5: Master Database -- Old Great Basin Pika Sites, Published and Unpublished Sources

9/5/17

| ID      | Mountain Range    | Location | State | Coordinates |               | Elevation<br>Site Specific<br>or Mean<br>(m) | Aspect | Most<br>Recent<br>Date<br>of Record | Citation (Published);<br>Source (Unpublished) |
|---------|-------------------|----------|-------|-------------|---------------|----------------------------------------------|--------|-------------------------------------|-----------------------------------------------|
|         |                   |          |       | Latitude    | Longitude     |                                              |        |                                     |                                               |
| JVG-001 | Hays Canyon Range | na       | NV    | 41.26574890 | -119.92112000 | 2259                                         | 270    | 2016                                | VanGunst unpublished                          |
| JVG-002 | Black Rock Range  | na       | NV    | 41.51998750 | -118.91958000 | 2229                                         | 131    | 2016                                | VanGunst unpublished                          |
| JVG-003 | Black Rock Range  | na       | NV    | 41.52017900 | -118.91937000 | 2230                                         | 142    | 2016                                | VanGunst unpublished                          |
| JVG-004 | Granite Range     | na       | NV    | 40.99563720 | -119.59886000 | 1782                                         | 228    | 2016                                | VanGunst unpublished                          |
| JVG-005 | Granite Range     | na       | NV    | 40.99612410 | -119.59838000 | 1797                                         | 210    | 2016                                | VanGunst unpublished                          |
| JVG-006 | Granite Range     | na       | NV    | 40.99630620 | -119.59857000 | 1797                                         | 210    | 2016                                | VanGunst unpublished                          |
| JVG-008 | High Rock         | na       | NV    | 41.52370750 | -119.47319000 | 1806                                         | 62     | 2016                                | VanGunst unpublished                          |
| JVG-009 | High Rock         | na       | NV    | 41.52387180 | -119.47309000 | 1806                                         | 62     | 2016                                | VanGunst unpublished                          |
| JVG-010 | High Rock         | na       | NV    | 41.52366280 | -119.47360000 | 1810                                         | 75     | 2016                                | VanGunst unpublished                          |
| JVG-011 | High Rock         | na       | NV    | 41.52361110 | -119.47349000 | 1811                                         | 67     | 2016                                | VanGunst unpublished                          |
| JVG-012 | High Rock         | na       | NV    | 41.42866000 | -119.63683000 | 1899                                         | 184    | 2016                                | VanGunst unpublished                          |
| JVG-013 | High Rock         | na       | NV    | 41.42867180 | -119.63680000 | 1899                                         | 184    | 2016                                | VanGunst unpublished                          |
| JVG-014 | High Rock         | na       | NV    | 41.42857680 | -119.63684000 | 1891                                         | 180    | 2016                                | VanGunst unpublished                          |
| JVG-015 | High Rock         | na       | NV    | 41.42853520 | -119.63660000 | 1890                                         | 175    | 2016                                | VanGunst unpublished                          |
| JVG-016 | High Rock         | na       | NV    | 41.42849980 | -119.63648000 | 1890                                         | 175    | 2016                                | VanGunst unpublished                          |
| JVG-017 | High Rock         | na       | NV    | 41.42213340 | -119.63905000 | 1854                                         | 328    | 2016                                | VanGunst unpublished                          |
| JVG-018 | High Rock         | na       | NV    | 41.42204830 | -119.63870000 | 1858                                         | 330    | 2016                                | VanGunst unpublished                          |
| JVG-019 | High Rock         | na       | NV    | 41.42205850 | -119.63809000 | 1865                                         | 331    | 2016                                | VanGunst unpublished                          |
| JVG-020 | High Rock         | na       | NV    | 41.42210880 | -119.63802000 | 1868                                         | 328    | 2016                                | VanGunst unpublished                          |
| JVG-021 | High Rock         | na       | NV    | 41.43257560 | -119.63727000 | 1929                                         | 319    | 2016                                | VanGunst unpublished                          |
| JVG-022 | High Rock         | na       | NV    | 41.43256310 | -119.63729000 | 1929                                         | 319    | 2016                                | VanGunst unpublished                          |
| JVG-023 | High Rock         | na       | NV    | 41.43238000 | -119.63768000 | 1931                                         | 317    | 2016                                | VanGunst unpublished                          |
| JVG-025 | High Rock         | na       | NV    | 41.43233890 | -119.63775000 | 1931                                         | 317    | 2016                                | VanGunst unpublished                          |
| JVG-026 | High Rock         | na       | NV    | 41.43227050 | -119.63788000 | 1925                                         | 313    | 2016                                | VanGunst unpublished                          |
| JVG-027 | High Rock         | na       | NV    | 41.43215750 | -119.63806000 | 1924                                         | 299    | 2016                                | VanGunst unpublished                          |
| JVG-028 | High Rock         | na       | NV    | 41.43202520 | -119.63810000 | 1924                                         | 299    | 2016                                | VanGunst unpublished                          |
| JVG-029 | High Rock         | na       | NV    | 41.43185070 | -119.63815000 | 1926                                         | 279    | 2016                                | VanGunst unpublished                          |
| JVG-030 | High Rock         | na       | NV    | 41.42435470 | -119.64083000 | 1843                                         | 153    | 2016                                | VanGunst unpublished                          |
| JVG-031 | High Rock         | na       | NV    | 41.54174330 | -119.60391000 | 1892                                         | 21     | 2016                                | VanGunst unpublished                          |
| JVG-032 | High Rock         | na       | NV    | 41.54177020 | -119.60391000 | 1892                                         | 21     | 2016                                | VanGunst unpublished                          |
| JVG-033 | High Rock         | na       | NV    | 41.55320000 | -119.58139000 | 1846                                         | 320    | 2016                                | VanGunst unpublished                          |
| JVG-034 | High Rock         | na       | NV    | 41.53272820 | -119.61694000 | 2048                                         | 70     | 2016                                | VanGunst unpublished                          |
| JVG-056 | High Rock         | na       | NV    | 41.53462760 | -119.61758000 | 2066                                         | 138    | 2016                                | VanGunst unpublished                          |
| JVG-057 | High Rock         | na       | NV    | 41.52975540 | -119.60991000 | 2031                                         | 5      | 2016                                | VanGunst unpublished                          |
| JVG-058 | High Rock         | na       | NV    | 41.52973780 | -119.60991000 | 2031                                         | 5      | 2016                                | VanGunst unpublished                          |
| JVG-059 | High Rock         | na       | NV    | 41.52973600 | -119.60990000 | 2031                                         | 5      | 2016                                | VanGunst unpublished                          |
| JVG-060 | High Rock         | na       | NV    | 41.55310970 | -119.58134000 | 1849                                         | 338    | 2016                                | VanGunst unpublished                          |
| JVG-061 | High Rock         | na       | NV    | 41.55283250 | -119.58136000 | 1857                                         | 330    | 2016                                | VanGunst unpublished                          |
| JVG-062 | High Rock         | na       | NV    | 41.52810340 | -119.60935000 | 2045                                         | 74     | 2016                                | VanGunst unpublished                          |
| JVG-063 | High Rock         | na       | NV    | 41.52802810 | -119.60934000 | 2047                                         | 67     | 2016                                | VanGunst unpublished                          |
| JVG-064 | High Rock         | na       | NV    | 41.52807170 | -119.60930000 | 2045                                         | 74     | 2016                                | VanGunst unpublished                          |
| JVG-065 | High Rock         | na       | NV    | 41.52813180 | -119.60932000 | 2045                                         | 74     | 2016                                | VanGunst unpublished                          |
| JVG-066 | Black Rock Range  | na       | NV    | 41.51238560 | -118.92631000 | 2368                                         | 119    | 2016                                | VanGunst unpublished                          |

|         |                   |        |    |             |               |      |     |      |                                                          |
|---------|-------------------|--------|----|-------------|---------------|------|-----|------|----------------------------------------------------------|
| JVG-067 | Black Rock Range  | na     | NV | 41.51222520 | -118.92701000 | 2368 | 305 | 2016 | VanGunst unpublished                                     |
| JVG-068 | Black Rock Range  | na     | NV | 41.51221840 | -118.92666000 | 2367 | 157 | 2016 | VanGunst unpublished                                     |
| JVG-069 | Black Rock Range  | na     | NV | 41.51221530 | -118.92667000 | 2368 | 176 | 2016 | VanGunst unpublished                                     |
| JVG-070 | Black Rock Range  | na     | NV | 41.51237860 | -118.92643000 | 2369 | 146 | 2016 | VanGunst unpublished                                     |
| JVG-071 | Black Rock Range  | na     | NV | 41.55696790 | -118.95526000 | 2105 | 227 | 2016 | VanGunst unpublished                                     |
| JVG-072 | Black Rock Range  | na     | NV | 41.55751690 | -118.95264000 | 2123 | 161 | 2016 | VanGunst unpublished                                     |
| JVG-073 | Black Rock Range  | na     | NV | 41.55742160 | -118.95245000 | 2118 | 188 | 2016 | VanGunst unpublished                                     |
| JVG-074 | Black Rock Range  | na     | NV | 41.55734780 | -118.95261000 | 2118 | 176 | 2016 | VanGunst unpublished                                     |
| JVG-076 | Black Rock Range  | na     | NV | 41.51222250 | -118.92706000 | 2368 | 305 | 2016 | VanGunst unpublished                                     |
| JVG-077 | Black Rock Range  | na     | NV | 41.51233750 | -118.92691000 | 2369 | 293 | 2016 | VanGunst unpublished                                     |
| JVG-078 | Black Rock Range  | na     | NV | 41.51239850 | -118.92680000 | 2369 | 293 | 2016 | VanGunst unpublished                                     |
| JVG-079 | Black Rock Range  | na     | NV | 41.51239450 | -118.92678000 | 2369 | 293 | 2016 | VanGunst unpublished                                     |
| JVG-080 | Black Rock Range  | na     | NV | 41.55703550 | -118.95531000 | 2102 | 227 | 2016 | VanGunst unpublished                                     |
| JVG-081 | Black Rock Range  | na     | NV | 41.55703150 | -118.95526000 | 2105 | 227 | 2016 | VanGunst unpublished                                     |
| JVG-082 | Black Rock Range  | na     | NV | 41.55734150 | -118.95236000 | 2118 | 188 | 2016 | VanGunst unpublished                                     |
| JVG-083 | Black Rock Range  | na     | NV | 41.55727950 | -118.95279000 | 2119 | 174 | 2016 | VanGunst unpublished                                     |
| JVG-084 | Sheldon Plateau   | na     | NV | 41.92647100 | -119.64752000 | 1789 | 303 | 2016 | VanGunst unpublished                                     |
| JVG-085 | Sheldon Plateau   | na     | NV | 41.92575700 | -119.64724000 | 1801 | 294 | 2016 | VanGunst unpublished                                     |
| JVG-086 | Sheldon Plateau   | na     | NV | 41.92553900 | -119.64639000 | 1824 | 301 | 2016 | VanGunst unpublished                                     |
| JVG-087 | Sheldon Plateau   | na     | NV | 41.92517800 | -119.64606000 | 1846 | 302 | 2016 | VanGunst unpublished                                     |
| JVG-092 | Sheldon Plateau   | na     | NV | 41.92530570 | -119.64625000 | 1832 | 304 | 2016 | VanGunst unpublished                                     |
| JVG-093 | Sheldon Plateau   | na     | NV | 41.92524320 | -119.64540000 | 1864 | 309 | 2016 | VanGunst unpublished                                     |
| JVG-094 | Sheldon Plateau   | na     | NV | 41.92532790 | -119.64521000 | 1864 | 314 | 2016 | VanGunst unpublished                                     |
| JVG-095 | Sheldon Plateau   | na     | NV | 41.92664610 | -119.64776000 | 1789 | 303 | 2016 | VanGunst unpublished                                     |
| JVG-096 | Sheldon Plateau   | na     | NV | 41.92650020 | -119.64757000 | 1789 | 303 | 2016 | VanGunst unpublished                                     |
| JVG-097 | Sheldon Plateau   | na     | NV | 41.92649720 | -119.64757000 | 1789 | 303 | 2016 | VanGunst unpublished                                     |
| JVG-098 | Sheldon Plateau   | na     | NV | 41.92613940 | -119.64746000 | 1795 | 299 | 2016 | VanGunst unpublished                                     |
| JVG-099 | Sheldon Plateau   | na     | NV | 41.92610390 | -119.64744000 | 1798 | 296 | 2016 | VanGunst unpublished                                     |
| JVG-100 | Sheldon Plateau   | na     | NV | 41.92583720 | -119.64724000 | 1798 | 296 | 2016 | VanGunst unpublished                                     |
| JVG-101 | Sheldon Plateau   | na     | NV | 41.92567640 | -119.64689000 | 1814 | 300 | 2016 | VanGunst unpublished                                     |
| JVG-102 | Sheldon Plateau   | na     | NV | 41.92565450 | -119.64676000 | 1814 | 300 | 2016 | VanGunst unpublished                                     |
| JVG-103 | Sheldon Plateau   | na     | NV | 41.92563450 | -119.64664000 | 1820 | 305 | 2016 | VanGunst unpublished                                     |
| JVG-104 | Sheldon Plateau   | na     | NV | 41.92538670 | -119.64625000 | 1832 | 304 | 2016 | VanGunst unpublished                                     |
| JVG-108 | Sheldon Plateau   | na     | NV | 41.92475670 | -119.64464000 | 1899 | 305 | 2016 | VanGunst unpublished                                     |
| JVG-112 | Sheldon Plateau   | na     | NV | 41.92444230 | -119.64463000 | 1908 | 300 | 2016 | VanGunst unpublished                                     |
| JVG-113 | Sheldon Plateau   | na     | NV | 41.92435480 | -119.64449000 | 1908 | 300 | 2016 | VanGunst unpublished                                     |
| JVG-115 | Sheldon Plateau   | na     | NV | 41.98793610 | -119.83976000 | 1852 | 260 | 2016 | VanGunst unpublished                                     |
| JVG-116 | Sheldon Plateau   | na     | NV | 41.98724480 | -119.83973000 | 1845 | 218 | 2016 | VanGunst unpublished                                     |
| JVG-117 | Sheldon Plateau   | na     | NV | 41.98724270 | -119.83967000 | 1850 | 206 | 2016 | VanGunst unpublished                                     |
| JVG-118 | Sheldon Plateau   | na     | NV | 41.98749000 | -119.83986000 | 1845 | 218 | 2016 | VanGunst unpublished                                     |
| JVG-119 | Sheldon Plateau   | na     | NV | 41.97433050 | -119.87531000 | 1954 | 146 | 2016 | VanGunst unpublished                                     |
| JVG-120 | Sheldon Plateau   | na     | NV | 41.97440460 | -119.87542000 | 1954 | 146 | 2016 | VanGunst unpublished                                     |
| JVG-121 | Sheldon Plateau   | na     | NV | 41.97454370 | -119.87556000 | 1955 | 14  | 2016 | VanGunst unpublished                                     |
| KH007   | Wasatch Range     | na     | UT | 40.6067944  | -111.71793    | 2574 | 13  | 2008 | Unpublished Utah State Monitoring Data (accessed 120516) |
| KH013   | Fish Lake Plateau | na     | UT | 38.7169213  | -111.6522     | 3435 | 31  | 2008 | Unpublished Utah State Monitoring Data (accessed 120516) |
| KH018   | Wasatch Range     | na     | UT | 40.6600515  | -111.70811    | 2804 | 292 | 2008 | Unpublished Utah State Monitoring Data (accessed 120516) |
| KH055   | Uinta Mountains   | na     | UT | 40.7013396  | -110.89915    | 3169 | 53  | 2011 | Unpublished Utah State Monitoring Data (accessed 120516) |
| KH058   | Markagunt Plateau | na     | UT | 37.6899611  | -112.65018    | 2656 | 51  | 2011 | Unpublished Utah State Monitoring Data (accessed 120516) |
| KH060   | Sevier Plateau    | Monroe | UT | 38.6065721  | -111.95421    | 3194 | 60  | 2011 | Unpublished Utah State Monitoring Data (accessed 120516) |

|            |                      |                   |    |             |              |      |     |      |                                                          |
|------------|----------------------|-------------------|----|-------------|--------------|------|-----|------|----------------------------------------------------------|
| KH068      | Wasatch Range        | na                | UT | 40.5183687  | -111.7372    | 2954 | 170 | 2011 | Unpublished Utah State Monitoring Data (accessed 120516) |
| KH079      | Uinta Mountains      | na                | UT | 40.5086228  | -111.04126   | 2628 | 347 | 2011 | Unpublished Utah State Monitoring Data (accessed 120516) |
| KH083      | Fish Lake Plateau    | na                | UT | 40.5713271  | -111.6348    | 3048 | 346 | 2011 | Unpublished Utah State Monitoring Data (accessed 120516) |
| KH084      | Bear River Mountains | na                | UT | 41.9218077  | -111.68825   | 2726 | 191 | 2011 | Unpublished Utah State Monitoring Data (accessed 120516) |
| KH088      | Bear River Mountains | na                | UT | 41.9176466  | -111.64959   | 2701 | 120 | 2011 | Unpublished Utah State Monitoring Data (accessed 120516) |
| KH089      | Bear River Mountains | na                | UT | 41.9634898  | -111.632     | 2585 | 27  | 2011 | Unpublished Utah State Monitoring Data (accessed 120516) |
| KH090      | Bear River Mountains | na                | UT | 41.9443601  | -111.70464   | 2463 | 64  | 2011 | Unpublished Utah State Monitoring Data (accessed 120516) |
| KH094      | Uinta Mountains      | na                | UT | 40.8130412  | -110.9445    | 3158 | 137 | 2011 | Unpublished Utah State Monitoring Data (accessed 120516) |
| KH100      | Fish Lake Plateau    | na                | UT | 38.6284225  | -111.73058   | 3244 | 326 | 2011 | Unpublished Utah State Monitoring Data (accessed 120516) |
| KH220      | Wasatch Range        | na                | UT | 40.6056479  | -111.7154    | 2622 | 13  | 2011 | Unpublished Utah State Monitoring Data (accessed 120516) |
| KH248      | Markagunt Plateau    | na                | UT | 37.5297234  | -112.72608   | 2789 | 150 | 2011 | Unpublished Utah State Monitoring Data (accessed 120516) |
| KH254      | Tushar Mountains     | na                | UT | 38.2384482  | -112.34152   | 3011 | 86  | 2011 | Unpublished Utah State Monitoring Data (accessed 120516) |
| KH262      | Tushar Mountains     | na                | UT | 38.2007009  | -112.38312   | 3024 | 114 | 2011 | Unpublished Utah State Monitoring Data (accessed 120516) |
| NDOW-1-031 | Sheldon Plateau      | Blowout Mountain  | NV | 41.72985267 | -119.2699076 | 2128 | 358 | 2009 | NDOW Unpublished, accessed March, 2016                   |
| NDOW-1-032 | Sheldon Plateau      | Blowout Mountain  | NV | 41.72842319 | -119.267044  | 2162 | 356 | 2009 | NDOW Unpublished, accessed March, 2016                   |
| NDOW-1-037 | Sheldon Plateau      | Guano Riim        | NV | 41.97109627 | -119.488527  | 1889 | 243 | 2009 | NDOW Unpublished, accessed March, 2016                   |
| NDOW-1-062 | Sheldon Plateau      | Horse Canyon      | NV | 41.7769903  | -119.3496600 | 1859 | 180 | 2009 | NDOW Unpublished, accessed March, 2016                   |
| NDOW-1-063 | Sheldon Plateau      | Horse Canyon      | NV | 41.77699031 | -119.3496555 | 1859 | 180 |      | NDOW Unpublished, accessed March, 2016                   |
| NDOW-1-064 | Sheldon Plateau      | Horse Canyon      | NV | 41.77562805 | -119.3493291 | 1851 | 282 | 2009 | NDOW Unpublished, accessed March, 2016                   |
| NDOW-1-111 | Shoshone Mountains   | na                | NV | 39.16067824 | -117.4540164 | 2728 | 155 | 2010 | NDOW Unpublished, accessed March, 2016                   |
| NDOW-1-112 | Shoshone Mountains   | na                | NV | 39.15995475 | -117.454683  | 2687 | 165 | 2010 | NDOW Unpublished, accessed March, 2016                   |
| NDOW-1-113 | Shoshone Mountains   | na                | NV | 39.16577871 | -117.4516415 | 2546 | 27  | 2010 | NDOW Unpublished, accessed March, 2016                   |
| NDOW-1-114 | Shoshone Mountains   | na                | NV | 39.16662691 | -117.453661  | 2575 | 33  | 2010 | NDOW Unpublished, accessed March, 2016                   |
| NDOW-1-115 | Shoshone Mountains   | na                | NV | 39.1656157  | -117.4518488 | 2553 | 37  | 2010 | NDOW Unpublished, accessed March, 2016                   |
| NDOW-1-116 | Shoshone Mountains   | na                | NV | 39.1611864  | -117.4531052 | 2736 | 142 | 2010 | NDOW Unpublished, accessed March, 2016                   |
| NDOW-1-135 | Massacre Rim         | na                | NV | 41.7573813  | -119.6953600 | 1857 | 320 | 2010 | NDOW Unpublished, accessed March, 2016                   |
| NDOW-1-136 | Massacre Rim         | na                | NV | 41.75625775 | -119.6952694 | 1872 | 302 | 2010 | NDOW Unpublished, accessed March, 2016                   |
| NDOW-1-137 | Massacre Rim         | na                | NV | 41.7558005  | -119.6913400 | 1941 | 323 | 2010 | NDOW Unpublished, accessed March, 2016                   |
| NDOW-1-138 | Massacre Rim         | na                | NV | 41.7573795  | -119.6919800 | 1884 | 329 | 2010 | NDOW Unpublished, accessed March, 2016                   |
| NDOW-1-149 | Monitor Range        | na                | NV | 38.8144623  | -116.5895400 | 3170 | 39  | 2010 | NDOW Unpublished, accessed March, 2016                   |
| NDOW-1-150 | Monitor Range        | na                | NV | 38.8143993  | -116.5895500 | 3179 | 34  | 2010 | NDOW Unpublished, accessed March, 2016                   |
| NDOW-1-151 | Monitor Range        | na                | NV | 38.8148574  | -116.6128800 | 2962 | 257 | 2010 | NDOW Unpublished, accessed March, 2016                   |
| NDOW-1-152 | Monitor Range        | na                | NV | 38.8148509  | -116.5898600 | 3170 | 60  | 2010 | NDOW Unpublished, accessed March, 2016                   |
| NDOW-1-153 | Monitor Range        | na                | NV | 38.8223503  | -116.5929300 | 3267 | 35  | 2010 | NDOW Unpublished, accessed March, 2016                   |
| NDOW-1-157 | Sheldon Plateau      | na                | NV | 41.9710963  | -119.4885300 | 1889 | 243 | 2009 | NDOW Unpublished, accessed March, 2016                   |
| NDOW-1-194 | Sheldon Plateau      | West Gooch Table  | NV | 41.8444428  | -119.2815100 | 1903 | 294 | 2009 | NDOW Unpublished, accessed March, 2016                   |
| NDOW-1-206 | Sheldon Plateau      | West Gooch Table  | NV | 41.8485400  | -119.2765500 | 1890 | 329 | 2009 | NDOW Unpublished, accessed March, 2016                   |
| NDOW-1-239 | Sheldon Plateau      | Mahogany Mountain | NV | 41.3412378  | -119.7265100 | 1933 | 231 | 2010 | NDOW Unpublished, accessed March, 2016                   |
| NDOW-1-240 | Sheldon Plateau      | Mahogany Mountain | NV | 41.3457525  | -119.7671300 | 1788 | 319 | 2010 | NDOW Unpublished, accessed March, 2016                   |
| NDOW-1-241 | Sheldon Plateau      | Mahogany Mountain | NV | 41.3401345  | -119.7267000 | 1912 | 234 | 2010 | NDOW Unpublished, accessed March, 2016                   |
| NDOW-1-242 | Sheldon Plateau      | Mahogany Mountain | NV | 41.3403279  | -119.7269000 | 1917 | 243 | 2010 | NDOW Unpublished, accessed March, 2016                   |
| NDOW-1-314 | Sheldon Plateau      | na                | NV | 41.7805386  | -119.6569800 | 2025 | 300 | na   | NDOW Unpublished, accessed March, 2016                   |
| NDOW-1-315 | Sheldon Plateau      | na                | NV | 41.9249682  | -119.8678100 | 1867 | 232 | na   | NDOW Unpublished, accessed March, 2016                   |
| NDOW-1-316 | Sheldon Plateau      | na                | NV | 41.9267684  | -119.8074000 | 1687 | 8   | na   | NDOW Unpublished, accessed March, 2016                   |
| NDOW-1-317 | Sheldon Plateau      | na                | NV | 41.9261473  | -119.8696400 | 1855 | 243 | na   | NDOW Unpublished, accessed March, 2016                   |
| NDOW-1-318 | Sheldon Plateau      | na                | NV | 41.9248714  | -119.8673600 | 1878 | 232 | na   | NDOW Unpublished, accessed March, 2016                   |
| NDOW-1-319 | Sheldon Plateau      | na                | NV | 41.9249676  | -119.8674800 | 1878 | 232 | na   | NDOW Unpublished, accessed March, 2016                   |
| NDOW-1-320 | Sheldon Plateau      | na                | NV | 41.9248594  | -119.8667600 | 1893 | 239 | na   | NDOW Unpublished, accessed March, 2016                   |
| NDOW-1-322 | Sheldon Plateau      | na                | NV | 41.7797400  | -119.6576300 | 2022 | 315 | na   | NDOW Unpublished, accessed March, 2016                   |

|             |                   |                  |    |             |              |      |     |      |                                        |
|-------------|-------------------|------------------|----|-------------|--------------|------|-----|------|----------------------------------------|
| NDOW-1-323  | Sheldon Plateau   | na               | NV | 41.9252311  | -119.8677400 | 1877 | 234 | na   | NDOW Unpublished, accessed March, 2016 |
| NDOW-1-346  | Sheldon Plateau   | Gooch Table      | NV | 41.8482666  | -119.2767000 | 1891 | 315 | 2009 | NDOW Unpublished, accessed March, 2016 |
| NDOW-1-347  | Sheldon Plateau   | Pruitt Canyon    | NV | 41.6860636  | -119.1136900 | 1990 | 254 | 2009 | NDOW Unpublished, accessed March, 2016 |
| NDOW-1-351  | Sheldon Plateau   | Blowout Mountain | NV | 41.7171898  | -119.2712800 | 1951 | 182 | 2009 | NDOW Unpublished, accessed March, 2016 |
| NDOW-1-352  | Sheldon Plateau   | Blowout Mountain | NV | 41.7171557  | -119.2711800 | 1951 | 182 | 2009 | NDOW Unpublished, accessed March, 2016 |
| NDOW-1-353  | Sheldon Plateau   | Blowout Mountain | NV | 41.7162739  | -119.2720500 | 1926 | 162 | 2009 | NDOW Unpublished, accessed March, 2016 |
| NDOW-1-354  | Sheldon Plateau   | Blowout Mountain | NV | 41.7160407  | -119.2729100 | 1935 | 130 | 2009 | NDOW Unpublished, accessed March, 2016 |
| NDOW-1-355  | Sheldon Plateau   | Blowout Mountain | NV | 41.7165228  | -119.2722200 | 1935 | 161 | 2009 | NDOW Unpublished, accessed March, 2016 |
| NDOW-1-356  | Sheldon Plateau   | Blowout Mountain | NV | 41.7164486  | -119.2723200 | 1940 | 158 | 2009 | NDOW Unpublished, accessed March, 2016 |
| NDOW-1-357  | Sheldon Plateau   | Blowout Mountain | NV | 41.7164491  | -119.2727500 | 1945 | 157 | 2009 | NDOW Unpublished, accessed March, 2016 |
| NDOW-1-358  | Sheldon Plateau   | Blowout Mountain | NV | 41.7159574  | -119.2730200 | 1935 | 130 | 2009 | NDOW Unpublished, accessed March, 2016 |
| NDOW-1-359  | Sheldon Plateau   | Blowout Mountain | NV | 41.7247577  | -119.2702300 | 2039 | 85  | 2009 | NDOW Unpublished, accessed March, 2016 |
| NDOW-1-360  | Sheldon Plateau   | Blowout Mountain | NV | 41.7226276  | -119.2686400 | 2014 | 171 | 2009 | NDOW Unpublished, accessed March, 2016 |
| NDOW-1-361  | Sheldon Plateau   | Blowout Mountain | NV | 41.7226423  | -119.2688100 | 2014 | 171 | 2009 | NDOW Unpublished, accessed March, 2016 |
| NDOW-1-362  | Sheldon Plateau   | Blowout Mountain | NV | 41.7210288  | -119.2707000 | 2024 | 112 | 2009 | NDOW Unpublished, accessed March, 2016 |
| NDOW-1-363  | Sheldon Plateau   | Blowout Mountain | NV | 41.7209090  | -119.2703900 | 2020 | 121 | 2009 | NDOW Unpublished, accessed March, 2016 |
| NDOW-1-364  | Sheldon Plateau   | Blowout Mountain | NV | 41.7205468  | -119.2704800 | 2015 | 101 | 2009 | NDOW Unpublished, accessed March, 2016 |
| NDOW-1-365  | Sheldon Plateau   | Blowout Mountain | NV | 41.7243953  | -119.2698800 | 2034 | 68  | 2009 | NDOW Unpublished, accessed March, 2016 |
| NDOW-1-377  | Sheldon Plateau   | Bald Mountain    | NV | 41.8358285  | -119.6243700 | 2158 | 283 | 2009 | NDOW Unpublished, accessed March, 2016 |
| NDOW-1-383  | Sheldon Plateau   | Mahogany Butte   | NV | 41.6156202  | -119.2110400 | 2051 | 61  | 2009 | NDOW Unpublished, accessed March, 2016 |
| NDOW-1-384  | Sheldon Plateau   | Mahogany Butte   | NV | 41.6157280  | -119.2110500 | 2051 | 61  | 2009 | NDOW Unpublished, accessed March, 2016 |
| NDOW-1-435  | Sheldon Plateau   | Horse Canyon     | NV | 41.7716795  | -119.3556700 | 1847 | 345 | 2009 | NDOW Unpublished, accessed March, 2016 |
| NDOW-1-436  | Sheldon Plateau   | Horse Canyon     | NV | 41.7733346  | -119.3553300 | 1853 | 168 | 2009 | NDOW Unpublished, accessed March, 2016 |
| NDOW-1-437  | Sheldon Plateau   | Horse Canyon     | NV | 41.7733194  | -119.3547500 | 1850 | 168 | 2009 | NDOW Unpublished, accessed March, 2016 |
| NDOW-1-438  | Sheldon Plateau   | Horse Canyon     | NV | 41.7723515  | -119.3540800 | 1854 | 286 | 2009 | NDOW Unpublished, accessed March, 2016 |
| NDOW-1-439  | Sheldon Plateau   | Horse Canyon     | NV | 41.77235178 | -119.3540699 | 1854 | 286 | 2009 | NDOW Unpublished, accessed March, 2016 |
| NDOW-1-440  | Sheldon Plateau   | Horse Canyon     | NV | 41.7723224  | -119.3537400 | 1856 | 291 | 2009 | NDOW Unpublished, accessed March, 2016 |
| NDOW-1-441  | Sheldon Plateau   | Horse Canyon     | NV | 41.7723594  | -119.3537000 | 1856 | 291 | 2009 | NDOW Unpublished, accessed March, 2016 |
| NDOW-1-442  | Sheldon Plateau   | Horse Canyon     | NV | 41.7725008  | -119.3533900 | 1857 | 311 | 2009 | NDOW Unpublished, accessed March, 2016 |
| NDOW-1-443  | Sheldon Plateau   | Horse Canyon     | NV | 41.7725743  | -119.3533200 | 1860 | 323 | 2009 | NDOW Unpublished, accessed March, 2016 |
| NDOW-1-444  | Sheldon Plateau   | Horse Canyon     | NV | 41.7745795  | -119.3504000 | 1848 | 297 | 2009 | NDOW Unpublished, accessed March, 2016 |
| NDOW-3-013  | Sheldon Plateau   | Washoe County    | NV | 41.3495513  | -119.7336900 | 1907 | 328 | 2014 | Jeffress et al. 2017                   |
| NDOW-3-014  | Sheldon Plateau   | Washoe County    | NV | 41.3497898  | -119.7335100 | 1902 | 341 | 2014 | Jeffress et al. 2017                   |
| NDOW-3-015  | Hays Canyon Range | Washoe County    | NV | 41.3221378  | -119.7976600 | 2112 | 37  | 2014 | Jeffress et al. 2017                   |
| NDOW-3-016  | Hays Canyon Range | Washoe County    | NV | 41.3219878  | -119.7979000 | 2119 | 33  | 2014 | Jeffress et al. 2017                   |
| NDOW-3-017  | Hays Canyon Range | Washoe County    | NV | 41.3219414  | -119.7979600 | 2125 | 56  | 2014 | Jeffress et al. 2017                   |
| NDOW-3-029  | Hays Canyon Range | Washoe County    | NV | 41.3179817  | -119.8589900 | 2081 | 309 | 2014 | Jeffress et al. 2017                   |
| NDOW-3-030  | Hays Canyon Range | Washoe County    | NV | 41.3179596  | -119.8591600 | 2081 | 309 | 2014 | Jeffress et al. 2017                   |
| NDOW-3-031  | Hays Canyon Range | Washoe County    | NV | 41.3177709  | -119.8591400 | 2085 | 310 | 2014 | Jeffress et al. 2017                   |
| NDOW-3-032  | Hays Canyon Range | Washoe County    | NV | 41.3169380  | -119.8596700 | 2087 | 302 | 2014 | Jeffress et al. 2017                   |
| NDOW-3-050  | Hays Canyon Range | Washoe County    | NV | 41.2995214  | -119.8279200 | 2024 | 347 | 2014 | Jeffress et al. 2017                   |
| NDOW-3-051  | Hays Canyon Range | Washoe County    | NV | 41.2984197  | -119.8287700 | 2041 | 349 | 2014 | Jeffress et al. 2017                   |
| NDOW-3-052  | Hays Canyon Range | Washoe County    | NV | 41.2983715  | -119.8289000 | 2039 | 345 | 2014 | Jeffress et al. 2017                   |
| NDOW-3-053  | Hays Canyon Range | Washoe County    | NV | 41.2983236  | -119.8290200 | 2047 | 347 | 2014 | Jeffress et al. 2017                   |
| NDOW-3-062  | Hays Canyon Range | Washoe County    | NV | 41.3066502  | -119.8488900 | 2048 | 254 | 2014 | Jeffress et al. 2017                   |
| NDOW-3-063  | Hays Canyon Range | Washoe County    | NV | 41.3067660  | -119.8489400 | 2047 | 284 | 2014 | Jeffress et al. 2017                   |
| NDOW-3-064  | Hays Canyon Range | Washoe County    | NV | 41.3068160  | -119.8487400 | 2050 | 304 | 2014 | Jeffress et al. 2017                   |
| NDOW-3-100  | High Rock         | Washoe County    | NV | 41.4907031  | -119.5004800 | 1780 | 215 | 2015 | Jeffress et al. 2017                   |
| NDOW-3-1000 | Hays Canyon Range | Washoe County    | NV | 41.3645698  | -119.9541700 | 2111 | 302 | 2015 | Jeffress et al. 2017                   |

|             |                   |               |    |            |              |      |     |      |                               |
|-------------|-------------------|---------------|----|------------|--------------|------|-----|------|-------------------------------|
| NDOW-3-1001 | Hays Canyon Range | Washoe County | NV | 41.3577568 | -119.8693400 | 1947 | 221 | 2015 | Jeffress et al. 2017          |
| NDOW-3-1002 | Hays Canyon Range | Washoe County | NV | 41.3576891 | -119.8695300 | 1942 | 226 | 2015 | Jeffress et al. 2017          |
| NDOW-3-1003 | Hays Canyon Range | Washoe County | NV | 41.3643940 | -119.9543500 | 2118 | 300 | 2015 | Jeffress et al. 2017          |
| NDOW-3-101  | High Rock         | Washoe County | NV | 41.4906594 | -119.5004200 | 1780 | 215 | 2015 | Jeffress et al. 2017          |
| NDOW-3-102  | High Rock         | Washoe County | NV | 41.4906972 | -119.5003400 | 1780 | 215 | 2015 | Jeffress et al. 2017          |
| NDOW-3-103  | High Rock         | Washoe County | NV | 41.4906247 | -119.5003600 | 1780 | 215 | 2015 | Jeffress et al. 2017          |
| NDOW-3-104  | High Rock         | Washoe County | NV | 41.4906419 | -119.5003900 | 1780 | 215 | 2015 | Jeffress et al. 2017          |
| NDOW-3-105  | High Rock         | Washoe County | NV | 41.4915878 | -119.5016300 | 1775 | 210 | 2015 | Jeffress et al. 2017          |
| NDOW-3-106  | High Rock         | Washoe County | NV | 41.4915770 | -119.5017100 | 1771 | 239 | 2015 | Jeffress et al. 2017          |
| NDOW-3-107  | High Rock         | Washoe County | NV | 41.4915793 | -119.5016000 | 1775 | 210 | 2015 | Jeffress et al. 2017          |
| NDOW-3-108  | High Rock         | Washoe County | NV | 41.4915880 | -119.5016200 | 1775 | 210 | 2015 | Jeffress et al. 2017          |
| NDOW-3-109  | High Rock         | Washoe County | NV | 41.4906790 | -119.5003500 | 1780 | 215 | 2015 | Jeffress et al. 2017          |
| NDOW-3-115  | High Rock         | Washoe County | NV | 41.4996728 | -119.5186637 | 1862 | 18  | 2015 | NDOW Unpublished, March, 2016 |
| NDOW-3-118  | High Rock         | Washoe County | NV | 41.4997723 | -119.5141152 | 1808 | 174 | 2015 | NDOW Unpublished, March, 2016 |
| NDOW-3-122  | High Rock         | Washoe County | NV | 41.4997210 | -119.5139934 | 1810 | 52  | 2015 | NDOW Unpublished, March, 2016 |
| NDOW-3-125  | High Rock         | Washoe County | NV | 41.4997398 | -119.5139582 | 1808 | 174 | 2015 | NDOW Unpublished, March, 2016 |
| NDOW-3-127  | High Rock         | Washoe County | NV | 41.4997633 | -119.5141149 | 1808 | 174 | 2015 | NDOW Unpublished, March, 2016 |
| NDOW-3-131  | High Rock         | Washoe County | NV | 41.4997458 | -119.5186187 | 1859 | 20  | 2015 | NDOW Unpublished, March, 2016 |
| NDOW-3-135  | High Rock         | Washoe County | NV | 41.4997551 | -119.5186070 | 1859 | 3   | 2015 | NDOW Unpublished, March, 2016 |
| NDOW-3-140  | High Rock         | Washoe County | NV | 41.4997577 | -119.5139589 | 1807 | 174 | 2015 | NDOW Unpublished, March, 2016 |
| NDOW-3-142  | High Rock         | Washoe County | NV | 41.5005067 | -119.5229370 | 1843 | 329 | 2015 | NDOW Unpublished, March, 2016 |
| NDOW-3-143  | High Rock         | Washoe County | NV | 41.5003707 | -119.5229796 | 1845 | 329 | 2015 | NDOW Unpublished, March, 2016 |
| NDOW-3-144  | High Rock         | Washoe County | NV | 41.5003810 | -119.5229201 | 1846 | 329 | 2015 | NDOW Unpublished, March, 2016 |
| NDOW-3-145  | High Rock         | Washoe County | NV | 41.5027600 | -119.5285954 | 1884 | 32  | 2015 | NDOW Unpublished, March, 2016 |
| NDOW-3-146  | High Rock         | Washoe County | NV | 41.5019909 | -119.5263012 | 1870 | 26  | 2015 | NDOW Unpublished, March, 2016 |
| NDOW-3-147  | High Rock         | Washoe County | NV | 41.5020277 | -119.5262667 | 1869 | 26  | 2015 | NDOW Unpublished, March, 2016 |
| NDOW-3-148  | High Rock         | Washoe County | NV | 41.5019811 | -119.5263368 | 1870 | 26  | 2015 | NDOW Unpublished, March, 2016 |
| NDOW-3-149  | High Rock         | Washoe County | NV | 41.5019849 | -119.5249352 | 1853 | 23  | 2015 | NDOW Unpublished, March, 2016 |
| NDOW-3-150  | High Rock         | Washoe County | NV | 41.5004595 | -119.5226237 | 1849 | 333 | 2015 | NDOW Unpublished, March, 2016 |
| NDOW-3-151  | High Rock         | Washoe County | NV | 41.5030713 | -119.5287753 | 1874 | 24  | 2015 | NDOW Unpublished, March, 2016 |
| NDOW-3-152  | High Rock         | Washoe County | NV | 41.5030621 | -119.5287869 | 1874 | 24  | 2015 | NDOW Unpublished, March, 2016 |
| NDOW-3-153  | High Rock         | Washoe County | NV | 41.5026968 | -119.5286050 | 1886 | 32  | 2015 | NDOW Unpublished, March, 2016 |
| NDOW-3-154  | High Rock         | Washoe County | NV | 41.5004532 | -119.5229110 | 1845 | 329 | 2015 | NDOW Unpublished, March, 2016 |
| NDOW-3-155  | High Rock         | Washoe County | NV | 41.5022863 | -119.5267919 | 1869 | 43  | 2015 | NDOW Unpublished, March, 2016 |
| NDOW-3-156  | High Rock         | Washoe County | NV | 41.5003421 | -119.5230504 | 1843 | 329 | 2015 | NDOW Unpublished, March, 2016 |
| NDOW-3-157  | High Rock         | Washoe County | NV | 41.5003805 | -119.5229441 | 1845 | 329 | 2015 | NDOW Unpublished, March, 2016 |
| NDOW-3-158  | High Rock         | Washoe County | NV | 41.5002256 | -119.5230219 | 1846 | 325 | 2015 | NDOW Unpublished, March, 2016 |
| NDOW-3-159  | High Rock         | Washoe County | NV | 41.5026035 | -119.5275231 | 1874 | 26  | 2015 | NDOW Unpublished, March, 2016 |
| NDOW-3-160  | High Rock         | Washoe County | NV | 41.5026302 | -119.5275361 | 1873 | 26  | 2015 | NDOW Unpublished, March, 2016 |
| NDOW-3-161  | High Rock         | Washoe County | NV | 41.5023554 | -119.5269264 | 1872 | 43  | 2015 | NDOW Unpublished, March, 2016 |
| NDOW-3-162  | High Rock         | Washoe County | NV | 41.5020894 | -119.5263290 | 1867 | 26  | 2015 | NDOW Unpublished, March, 2016 |
| NDOW-3-163  | High Rock         | Washoe County | NV | 41.5020274 | -119.5262787 | 1869 | 26  | 2015 | NDOW Unpublished, March, 2016 |
| NDOW-3-164  | High Rock         | Washoe County | NV | 41.5003614 | -119.5229913 | 1844 | 329 | 2015 | NDOW Unpublished, March, 2016 |
| NDOW-3-165  | High Rock         | Washoe County | NV | 41.5026488 | -119.5275129 | 1872 | 26  | 2015 | NDOW Unpublished, March, 2016 |
| NDOW-3-166  | High Rock         | Washoe County | NV | 41.5022953 | -119.5267923 | 1869 | 43  | 2015 | NDOW Unpublished, March, 2016 |
| NDOW-3-167  | High Rock         | Washoe County | NV | 41.5019938 | -119.5261696 | 1869 | 26  | 2015 | NDOW Unpublished, March, 2016 |
| NDOW-3-168  | High Rock         | Washoe County | NV | 41.5025912 | -119.5284930 | 1886 | 32  | 2015 | NDOW Unpublished, March, 2016 |
| NDOW-3-169  | High Rock         | Washoe County | NV | 41.5020804 | -119.5263287 | 1867 | 26  | 2015 | NDOW Unpublished, March, 2016 |
| NDOW-3-170  | High Rock         | Washoe County | NV | 41.5003815 | -119.5228962 | 1846 | 329 | 2015 | NDOW Unpublished, March, 2016 |

|            |                    |               |    |            |              |      |     |      |                               |
|------------|--------------------|---------------|----|------------|--------------|------|-----|------|-------------------------------|
| NDOW-3-171 | High Rock          | Washoe County | NV | 41.5003908 | -119.5228846 | 1847 | 329 | 2015 | NDOW Unpublished, March, 2016 |
| NDOW-3-172 | High Rock          | Washoe County | NV | 41.5026310 | -119.5275002 | 1872 | 26  | 2015 | NDOW Unpublished, March, 2016 |
| NDOW-3-173 | High Rock          | Washoe County | NV | 41.5020282 | -119.5262428 | 1869 | 26  | 2015 | NDOW Unpublished, March, 2016 |
| NDOW-3-174 | High Rock          | Washoe County | NV | 41.5003910 | -119.5228726 | 1847 | 329 | 2015 | NDOW Unpublished, March, 2016 |
| NDOW-3-175 | High Rock          | Washoe County | NV | 41.5023382 | -119.5268898 | 1871 | 43  | 2015 | NDOW Unpublished, March, 2016 |
| NDOW-3-176 | High Rock          | Washoe County | NV | 41.5003339 | -119.5230142 | 1844 | 329 | 2015 | NDOW Unpublished, March, 2016 |
| NDOW-3-177 | High Rock          | Washoe County | NV | 41.5003522 | -119.5230029 | 1844 | 329 | 2015 | NDOW Unpublished, March, 2016 |
| NDOW-3-179 | High Rock          | Washoe County | NV | 41.5026366 | -119.5272488 | 1870 | 39  | 2015 | NDOW Unpublished, March, 2016 |
| NDOW-3-182 | High Rock          | Washoe County | NV | 41.5027156 | -119.5285698 | 1885 | 32  | 2015 | NDOW Unpublished, March, 2016 |
| NDOW-3-183 | High Rock          | Washoe County | NV | 41.5026371 | -119.5272249 | 1870 | 39  | 2015 | NDOW Unpublished, March, 2016 |
| NDOW-3-184 | Mosquito Mountains | Washoe County | NV | 41.9037638 | -119.9560200 | 1717 | 218 | 2015 | Jeffress et al. 2017          |
| NDOW-3-185 | Mosquito Mountains | Washoe County | NV | 41.9037067 | -119.9561400 | 1714 | 219 | 2015 | Jeffress et al. 2017          |
| NDOW-3-186 | Mosquito Mountains | Washoe County | NV | 41.9037250 | -119.9561300 | 1714 | 219 | 2015 | Jeffress et al. 2017          |
| NDOW-3-187 | Mosquito Mountains | Washoe County | NV | 41.9037517 | -119.9561400 | 1714 | 219 | 2015 | Jeffress et al. 2017          |
| NDOW-3-188 | Mosquito Mountains | Washoe County | NV | 41.9041139 | -119.9564100 | 1714 | 216 | 2015 | Jeffress et al. 2017          |
| NDOW-3-189 | Mosquito Mountains | Washoe County | NV | 41.9041881 | -119.9563300 | 1719 | 225 | 2015 | Jeffress et al. 2017          |
| NDOW-3-190 | Mosquito Mountains | Washoe County | NV | 41.9039185 | -119.9556100 | 1721 | 217 | 2015 | Jeffress et al. 2017          |
| NDOW-3-191 | Mosquito Mountains | Washoe County | NV | 41.9035194 | -119.9553700 | 1718 | 208 | 2015 | Jeffress et al. 2017          |
| NDOW-3-192 | Mosquito Mountains | Washoe County | NV | 41.9050308 | -119.9571800 | 1719 | 225 | 2015 | Jeffress et al. 2017          |
| NDOW-3-193 | Mosquito Mountains | Washoe County | NV | 41.9050733 | -119.9572800 | 1717 | 230 | 2015 | Jeffress et al. 2017          |
| NDOW-3-197 | Mosquitos          | Washoe County | NV | 41.8399007 | -119.8627805 | 1970 | 125 | 2015 | NDOW Unpublished, March, 2016 |
| NDOW-3-198 | Mosquitos          | Washoe County | NV | 41.8394530 | -119.8630375 | 1982 | 127 | 2015 | NDOW Unpublished, March, 2016 |
| NDOW-3-199 | Mosquitos          | Washoe County | NV | 41.8398797 | -119.8629000 | 1975 | 125 | 2015 | NDOW Unpublished, March, 2016 |
| NDOW-3-200 | Mosquitos          | Washoe County | NV | 41.8393958 | -119.8635287 | 2006 | 121 | 2015 | NDOW Unpublished, March, 2016 |
| NDOW-3-201 | Mosquitos          | Washoe County | NV | 41.8390914 | -119.8634549 | 2005 | 105 | 2015 | NDOW Unpublished, March, 2016 |
| NDOW-3-202 | Mosquitos          | Washoe County | NV | 41.8393799 | -119.8634437 | 2001 | 121 | 2015 | NDOW Unpublished, March, 2016 |
| NDOW-3-203 | Mosquitos          | Washoe County | NV | 41.8392977 | -119.8631269 | 1987 | 118 | 2015 | NDOW Unpublished, March, 2016 |
| NDOW-3-204 | Mosquitos          | Washoe County | NV | 41.8396947 | -119.8634577 | 2001 | 128 | 2015 | NDOW Unpublished, March, 2016 |
| NDOW-3-205 | Mosquitos          | Washoe County | NV | 41.8393133 | -119.8635852 | 2009 | 121 | 2015 | NDOW Unpublished, March, 2016 |
| NDOW-3-206 | Mosquitos          | Washoe County | NV | 41.8392332 | -119.8635455 | 2009 | 121 | 2015 | NDOW Unpublished, March, 2016 |
| NDOW-3-207 | Mosquitos          | Washoe County | NV | 41.8394018 | -119.8629268 | 1976 | 116 | 2015 | NDOW Unpublished, March, 2016 |
| NDOW-3-208 | Mosquito Mountains | Washoe County | NV | 41.8396123 | -119.8635100 | 1965 | 128 | 2015 | Jeffress et al. 2017          |
| NDOW-3-209 | Mosquito Mountains | Washoe County | NV | 41.8398638 | -119.8631800 | 1962 | 126 | 2015 | Jeffress et al. 2017          |
| NDOW-3-210 | Mosquito Mountains | Washoe County | NV | 41.8395379 | -119.8636100 | 1965 | 128 | 2015 | Jeffress et al. 2017          |
| NDOW-3-211 | Mosquitos          | Washoe County | NV | 41.8399274 | -119.8627937 | 1970 | 125 | 2015 | NDOW Unpublished, March, 2016 |
| NDOW-3-212 | Mosquitos          | Washoe County | NV | 41.8393151 | -119.8631518 | 1988 | 118 | 2015 | NDOW Unpublished, March, 2016 |
| NDOW-3-213 | Mosquitos          | Washoe County | NV | 41.8398731 | -119.8631646 | 1987 | 126 | 2015 | NDOW Unpublished, March, 2016 |
| NDOW-3-214 | Mosquito Mountains | Washoe County | NV | 41.8393091 | -119.8637500 | 1966 | 121 | 2015 | Jeffress et al. 2017          |
| NDOW-3-215 | Mosquito Mountains | Washoe County | NV | 41.8397832 | -119.8635200 | 1973 | 128 | 2015 | Jeffress et al. 2017          |
| NDOW-3-216 | Mosquito Mountains | Washoe County | NV | 41.8398287 | -119.8635000 | 1973 | 128 | 2015 | Jeffress et al. 2017          |
| NDOW-3-217 | Mosquito Mountains | Washoe County | NV | 41.8398515 | -119.8633100 | 1962 | 126 | 2015 | Jeffress et al. 2017          |
| NDOW-3-218 | Mosquito Mountains | Washoe County | NV | 41.8394776 | -119.8627700 | 1933 | 125 | 2015 | Jeffress et al. 2017          |
| NDOW-3-219 | Mosquito Mountains | Washoe County | NV | 41.8390971 | -119.8635900 | 1952 | 105 | 2015 | Jeffress et al. 2017          |
| NDOW-3-220 | Mosquitos          | Washoe County | NV | 41.8394003 | -119.8629870 | 1980 | 116 | 2015 | NDOW Unpublished, March, 2016 |
| NDOW-3-221 | Mosquitos          | Washoe County | NV | 41.8393793 | -119.8634677 | 2003 | 121 | 2015 | NDOW Unpublished, March, 2016 |
| NDOW-3-222 | Mosquitos          | Washoe County | NV | 41.8395199 | -119.8636065 | 2009 | 128 | 2015 | NDOW Unpublished, March, 2016 |
| NDOW-3-223 | Mosquitos          | Washoe County | NV | 41.8394186 | -119.8629757 | 1979 | 116 | 2015 | NDOW Unpublished, March, 2016 |
| NDOW-3-224 | Mosquito Mountains | Washoe County | NV | 41.8394401 | -119.8635500 | 1956 | 121 | 2015 | Jeffress et al. 2017          |
| NDOW-3-225 | Mosquito Mountains | Washoe County | NV | 41.8396560 | -119.8635600 | 1965 | 128 | 2015 | Jeffress et al. 2017          |

|            |                        |                 |    |            |              |      |     |      |                      |
|------------|------------------------|-----------------|----|------------|--------------|------|-----|------|----------------------|
| NDOW-3-228 | High Rock              | Washoe County   | NV | 41.5003243 | -119.5135900 | 1825 | 178 | 2015 | Jeffress et al. 2017 |
| NDOW-3-263 | High Rock              | Washoe County   | NV | 41.4895904 | -119.5002900 | 1784 | 52  | 2015 | Jeffress et al. 2017 |
| NDOW-3-264 | High Rock              | Washoe County   | NV | 41.4995971 | -119.5138900 | 1800 | 52  | 2015 | Jeffress et al. 2017 |
| NDOW-3-265 | High Rock              | Washoe County   | NV | 41.4903656 | -119.5002600 | 1779 | 194 | 2015 | Jeffress et al. 2017 |
| NDOW-3-266 | High Rock              | Washoe County   | NV | 41.4997305 | -119.5139700 | 1805 | 174 | 2015 | Jeffress et al. 2017 |
| NDOW-3-269 | High Rock              | Washoe County   | NV | 41.4898173 | -119.4998000 | 1774 | 93  | 2015 | Jeffress et al. 2017 |
| NDOW-3-270 | High Rock              | Washoe County   | NV | 41.4898216 | -119.5000200 | 1776 | 63  | 2015 | Jeffress et al. 2017 |
| NDOW-3-271 | High Rock              | Washoe County   | NV | 41.4803084 | -119.5731800 | 1904 | 235 | 2015 | Jeffress et al. 2017 |
| NDOW-3-272 | High Rock              | Washoe County   | NV | 41.4897735 | -119.5001600 | 1776 | 63  | 2015 | Jeffress et al. 2017 |
| NDOW-3-274 | High Rock              | Washoe County   | NV | 41.4905405 | -119.5000900 | 1779 | 194 | 2015 | Jeffress et al. 2017 |
| NDOW-3-277 | High Rock              | Washoe County   | NV | 41.4994518 | -119.5139500 | 1800 | 52  | 2015 | Jeffress et al. 2017 |
| NDOW-3-283 | High Rock              | Washoe County   | NV | 41.4998107 | -119.5140100 | 1805 | 174 | 2015 | Jeffress et al. 2017 |
| NDOW-3-284 | High Rock              | Washoe County   | NV | 41.4897840 | -119.5000900 | 1776 | 63  | 2015 | Jeffress et al. 2017 |
| NDOW-3-285 | High Rock              | Washoe County   | NV | 41.4897285 | -119.5001600 | 1776 | 63  | 2015 | Jeffress et al. 2017 |
| NDOW-3-287 | High Rock              | Washoe County   | NV | 41.4891649 | -119.4991500 | 1777 | 135 | 2015 | Jeffress et al. 2017 |
| NDOW-3-288 | High Rock              | Washoe County   | NV | 41.4906425 | -119.5003700 | 1780 | 215 | 2015 | Jeffress et al. 2017 |
| NDOW-3-291 | High Rock              | Washoe County   | NV | 41.4997893 | -119.5141600 | 1805 | 174 | 2015 | Jeffress et al. 2017 |
| NDOW-3-292 | High Rock              | Washoe County   | NV | 41.4997851 | -119.5143600 | 1807 | 162 | 2015 | Jeffress et al. 2017 |
| NDOW-3-307 | High Rock              | Washoe County   | NV | 41.4675779 | -119.5685500 | 1846 | 261 | 2015 | Jeffress et al. 2017 |
| NDOW-3-330 | High Rock              | Washoe County   | NV | 41.4888974 | -119.5340000 | 1949 | 246 | 2015 | Jeffress et al. 2017 |
| NDOW-3-332 | High Rock              | Washoe County   | NV | 41.4897580 | -119.5337700 | 1945 | 312 | 2015 | Jeffress et al. 2017 |
| NDOW-3-333 | High Rock Canyon Hills | Humboldt County | NV | 41.5296498 | -119.2961800 | 1746 | 282 | 2015 | Jeffress et al. 2017 |
| NDOW-3-336 | High Rock              | Washoe County   | NV | 41.4889596 | -119.5340400 | 1949 | 246 | 2015 | Jeffress et al. 2017 |
| NDOW-3-337 | High Rock              | Washoe County   | NV | 41.5030890 | -119.5287900 | 1865 | 24  | 2015 | Jeffress et al. 2017 |
| NDOW-3-339 | High Rock              | Washoe County   | NV | 41.5031015 | -119.5290400 | 1867 | 21  | 2015 | Jeffress et al. 2017 |
| NDOW-3-340 | High Rock              | Washoe County   | NV | 41.5031058 | -119.5292600 | 1870 | 18  | 2015 | Jeffress et al. 2017 |
| NDOW-3-342 | High Rock              | Washoe County   | NV | 41.4887741 | -119.5342800 | 1947 | 301 | 2015 | Jeffress et al. 2017 |
| NDOW-3-346 | High Rock              | Washoe County   | NV | 41.5026313 | -119.5274900 | 1860 | 39  | 2015 | Jeffress et al. 2017 |
| NDOW-3-386 | High Rock              | Washoe County   | NV | 41.4899538 | -119.5707900 | 1953 | 74  | 2015 | Jeffress et al. 2017 |
| NDOW-3-391 | High Rock              | Washoe County   | NV | 41.4686864 | -119.5527500 | 1846 | 285 | 2015 | Jeffress et al. 2017 |
| NDOW-3-394 | High Rock              | Washoe County   | NV | 41.4899175 | -119.5708000 | 1953 | 74  | 2015 | Jeffress et al. 2017 |
| NDOW-3-405 | High Rock              | Washoe County   | NV | 41.4899707 | -119.5708400 | 1957 | 64  | 2015 | Jeffress et al. 2017 |
| NDOW-3-407 | High Rock              | Washoe County   | NV | 41.4899426 | -119.5708800 | 1957 | 64  | 2015 | Jeffress et al. 2017 |
| NDOW-3-409 | High Rock              | Washoe County   | NV | 41.4713046 | -119.5512500 | 1885 | 273 | 2015 | Jeffress et al. 2017 |
| NDOW-3-412 | High Rock              | Washoe County   | NV | 41.4686861 | -119.5527600 | 1846 | 285 | 2015 | Jeffress et al. 2017 |
| NDOW-3-426 | High Rock              | Washoe County   | NV | 41.4899794 | -119.5708500 | 1957 | 64  | 2015 | Jeffress et al. 2017 |
| NDOW-3-430 | High Rock              | Washoe County   | NV | 41.4686051 | -119.5527600 | 1849 | 274 | 2015 | Jeffress et al. 2017 |
| NDOW-3-431 | High Rock              | Washoe County   | NV | 41.4687142 | -119.5527200 | 1846 | 285 | 2015 | Jeffress et al. 2017 |
| NDOW-3-432 | High Rock              | Washoe County   | NV | 41.4687867 | -119.5527000 | 1846 | 285 | 2015 | Jeffress et al. 2017 |
| NDOW-3-477 | High Rock              | Washoe County   | NV | 41.4894296 | -119.5704700 | 1951 | 61  | 2015 | Jeffress et al. 2017 |
| NDOW-3-478 | High Rock              | Washoe County   | NV | 41.4894007 | -119.5705500 | 1951 | 61  | 2015 | Jeffress et al. 2017 |
| NDOW-3-479 | High Rock              | Washoe County   | NV | 41.4895510 | -119.5706800 | 1953 | 74  | 2015 | Jeffress et al. 2017 |
| NDOW-3-480 | High Rock              | Washoe County   | NV | 41.4895613 | -119.5706200 | 1953 | 74  | 2015 | Jeffress et al. 2017 |
| NDOW-3-532 | Black Rock Range       | Humboldt County | NV | 41.4812771 | -118.9149400 | 2282 | 330 | 2015 | Jeffress et al. 2017 |
| NDOW-3-533 | Black Rock Range       | Humboldt County | NV | 41.4813409 | -118.9149000 | 2282 | 330 | 2015 | Jeffress et al. 2017 |
| NDOW-3-534 | Black Rock Range       | Humboldt County | NV | 41.4816214 | -118.9148200 | 2269 | 323 | 2015 | Jeffress et al. 2017 |
| NDOW-3-535 | Black Rock Range       | Humboldt County | NV | 41.4817958 | -118.9146200 | 2269 | 324 | 2015 | Jeffress et al. 2017 |
| NDOW-3-536 | Black Rock Range       | Humboldt County | NV | 41.4860981 | -118.9110100 | 2113 | 312 | 2015 | Jeffress et al. 2017 |
| NDOW-3-537 | Black Rock Range       | Humboldt County | NV | 41.4819900 | -118.9143200 | 2261 | 338 | 2015 | Jeffress et al. 2017 |

|            |                    |                 |    |            |              |      |     |      |                               |
|------------|--------------------|-----------------|----|------------|--------------|------|-----|------|-------------------------------|
| NDOW-3-538 | Black Rock Range   | Humboldt County | NV | 41.4815501 | -118.9147700 | 2269 | 323 | 2015 | Jeffress et al. 2017          |
| NDOW-3-539 | Black Rock Range   | Humboldt County | NV | 41.4860715 | -118.9109900 | 2113 | 312 | 2015 | Jeffress et al. 2017          |
| NDOW-3-540 | Black Rock Range   | Humboldt County | NV | 41.4817680 | -118.9146700 | 2269 | 324 | 2015 | Jeffress et al. 2017          |
| NDOW-3-541 | Black Rock Range   | Humboldt County | NV | 41.4815592 | -118.9147700 | 2269 | 323 | 2015 | Jeffress et al. 2017          |
| NDOW-3-542 | Black Rock Range   | Humboldt County | NV | 41.4812595 | -118.9149200 | 2282 | 330 | 2015 | Jeffress et al. 2017          |
| NDOW-3-544 | Black Rock Range   | Humboldt County | NV | 41.4812863 | -118.9149300 | 2282 | 330 | 2015 | Jeffress et al. 2017          |
| NDOW-3-545 | Black Rock Range   | Humboldt County | NV | 41.5103563 | -118.9784700 | 2235 | 180 | 2015 | Jeffress et al. 2017          |
| NDOW-3-546 | Black Rock Range   | Humboldt County | NV | 41.5109554 | -118.9766300 | 2253 | 181 | 2015 | Jeffress et al. 2017          |
| NDOW-3-547 | Black Rock Range   | Humboldt County | NV | 41.5108378 | -118.9777000 | 2253 | 189 | 2015 | Jeffress et al. 2017          |
| NDOW-3-548 | Black Rock Range   | Humboldt County | NV | 41.4823872 | -118.9707800 | 2577 | 346 | 2015 | Jeffress et al. 2017          |
| NDOW-3-549 | Black Rock Range   | Humboldt County | NV | 41.4826145 | -118.9711800 | 2559 | 345 | 2015 | Jeffress et al. 2017          |
| NDOW-3-550 | Black Rock Range   | Humboldt County | NV | 41.4722956 | -119.0192800 | 2335 | 219 | 2015 | Jeffress et al. 2017          |
| NDOW-3-551 | Black Rock Range   | Humboldt County | NV | 41.4835928 | -118.9766200 | 2528 | 350 | 2015 | Jeffress et al. 2017          |
| NDOW-3-552 | Black Rock Range   | Humboldt County | NV | 41.4744973 | -119.0154600 | 2437 | 169 | 2015 | Jeffress et al. 2017          |
| NDOW-3-553 | Black Rock Range   | Humboldt County | NV | 41.4728914 | -119.0192100 | 2358 | 248 | 2015 | Jeffress et al. 2017          |
| NDOW-3-554 | Black Rock Range   | Humboldt County | NV | 41.4836452 | -118.9767200 | 2504 | 0   | 2015 | Jeffress et al. 2017          |
| NDOW-3-555 | Black Rock Range   | Humboldt County | NV | 41.4726293 | -119.0192600 | 2349 | 228 | 2015 | Jeffress et al. 2017          |
| NDOW-3-556 | Black Rock Range   | Humboldt County | NV | 41.4723270 | -119.0190300 | 2346 | 217 | 2015 | Jeffress et al. 2017          |
| NDOW-3-557 | Black Rock Range   | Humboldt County | NV | 41.4731108 | -119.0190200 | 2375 | 266 | 2015 | Jeffress et al. 2017          |
| NDOW-3-558 | Black Rock Range   | Humboldt County | NV | 41.4733533 | -119.0185500 | 2404 | 280 | 2015 | Jeffress et al. 2017          |
| NDOW-3-559 | Black Rock Range   | Humboldt County | NV | 41.4825693 | -118.9711900 | 2559 | 345 | 2015 | Jeffress et al. 2017          |
| NDOW-3-560 | Black Rock Range   | Humboldt County | NV | 41.4823956 | -118.9708100 | 2577 | 346 | 2015 | Jeffress et al. 2017          |
| NDOW-3-561 | Black Rock Range   | Humboldt County | NV | 41.4836450 | -118.9767300 | 2504 | 0   | 2015 | Jeffress et al. 2017          |
| NDOW-3-562 | Black Rock Range   | Humboldt County | NV | 41.4824913 | -118.9710100 | 2572 | 341 | 2015 | Jeffress et al. 2017          |
| NDOW-3-563 | Black Rock Range   | Humboldt County | NV | 41.4742119 | -119.0168400 | 2441 | 168 | 2015 | Jeffress et al. 2017          |
| NDOW-3-564 | Black Rock Range   | Humboldt County | NV | 41.4731007 | -119.0190800 | 2375 | 266 | 2015 | Jeffress et al. 2017          |
| NDOW-3-565 | Black Rock Range   | Humboldt County | NV | 41.4825257 | -118.9711000 | 2561 | 345 | 2015 | Jeffress et al. 2017          |
| NDOW-3-566 | Black Rock Range   | Humboldt County | NV | 41.4243979 | -118.9772500 | 2146 | 321 | 2015 | Jeffress et al. 2017          |
| NDOW-3-573 | Mosquito Mountains | Washoe County   | NV | 41.9049052 | -119.9571600 | 1717 | 216 | 2015 | Jeffress et al. 2017          |
| NDOW-3-575 | Mosquito Mountains | Washoe County   | NV | 41.8544627 | -119.9586500 | 1793 | 245 | 2015 | Jeffress et al. 2017          |
| NDOW-3-576 | Mosquito Mountains | Washoe County   | NV | 41.8230993 | -119.9504900 | 1861 | 236 | 2015 | Jeffress et al. 2017          |
| NDOW-3-581 | Mosquito Mountains | Washoe County   | NV | 41.8230382 | -119.9504100 | 1858 | 231 | 2015 | Jeffress et al. 2017          |
| NDOW-3-583 | Mosquito Mountains | Washoe County   | NV | 41.7669669 | -119.8709400 | 1855 | 115 | 2015 | Jeffress et al. 2017          |
| NDOW-3-590 | Mosquito Mountains | Washoe County   | NV | 41.7719365 | -119.8695600 | 1871 | 180 | 2015 | Jeffress et al. 2017          |
| NDOW-3-591 | Mosquito Mountains | Washoe County   | NV | 41.8188011 | -119.9579300 | 1860 | 223 | 2015 | Jeffress et al. 2017          |
| NDOW-3-592 | Mosquito Mountains | Washoe County   | NV | 41.8191680 | -119.9583700 | 1855 | 227 | 2015 | Jeffress et al. 2017          |
| NDOW-3-593 | Mosquito Mountains | Washoe County   | NV | 41.8194583 | -119.9589900 | 1849 | 226 | 2015 | Jeffress et al. 2017          |
| NDOW-3-594 | Mosquito Mountains | Washoe County   | NV | 41.8143438 | -119.9544200 | 1771 | 218 | 2015 | Jeffress et al. 2017          |
| NDOW-3-595 | Mosquito Mountains | Washoe County   | NV | 41.8144505 | -119.9544700 | 1773 | 202 | 2015 | Jeffress et al. 2017          |
| NDOW-3-603 | Mosquito Mountains | Washoe County   | NV | 41.7339309 | -119.8893600 | 1858 | 87  | 2015 | Jeffress et al. 2017          |
| NDOW-3-611 | Mosquito Mountains | Washoe County   | NV | 41.8169567 | -119.9550700 | 1816 | 169 | 2015 | Jeffress et al. 2017          |
| NDOW-3-618 | Mosquito Mountains | Washoe County   | NV | 41.8145572 | -119.9541800 | 1775 | 214 | 2015 | Jeffress et al. 2017          |
| NDOW-3-623 | Mosquitos          | Washoe County   | NV | 41.8104157 | -119.9425616 | 1893 | 225 | 2015 | NDOW Unpublished, March, 2016 |
| NDOW-3-624 | Mosquito Mountains | Washoe County   | NV | 41.8107936 | -119.9429300 | 1902 | 222 | 2015 | Jeffress et al. 2017          |
| NDOW-3-649 | Mosquito Mountains | Washoe County   | NV | 41.8144617 | -119.9449300 | 1882 | 261 | 2015 | Jeffress et al. 2017          |
| NDOW-3-651 | Mosquito Mountains | Washoe County   | NV | 41.8111140 | -119.9472900 | 1817 | 234 | 2015 | Jeffress et al. 2017          |
| NDOW-3-652 | Mosquito Mountains | Washoe County   | NV | 41.8112203 | -119.9470000 | 1823 | 230 | 2015 | Jeffress et al. 2017          |
| NDOW-3-653 | Mosquito Mountains | Washoe County   | NV | 41.8107352 | -119.9466100 | 1825 | 231 | 2015 | Jeffress et al. 2017          |
| NDOW-3-655 | Mosquito Mountains | Washoe County   | NV | 41.8116082 | -119.9434700 | 1899 | 250 | 2015 | Jeffress et al. 2017          |



|            |                    |               |    |            |              |      |     |      |                      |
|------------|--------------------|---------------|----|------------|--------------|------|-----|------|----------------------|
| NDOW-3-657 | Mosquito Mountains | Washoe County | NV | 41.8057842 | -119.9419600 | 1852 | 243 | 2015 | Jeffress et al. 2017 |
| NDOW-3-658 | Mosquito Mountains | Washoe County | NV | 41.8056606 | -119.9415100 | 1860 | 239 | 2015 | Jeffress et al. 2017 |
| NDOW-3-659 | Mosquito Mountains | Washoe County | NV | 41.8055089 | -119.9414600 | 1858 | 237 | 2015 | Jeffress et al. 2017 |
| NDOW-3-660 | Mosquito Mountains | Washoe County | NV | 41.8081605 | -119.9406000 | 1926 | 242 | 2015 | Jeffress et al. 2017 |
| NDOW-3-661 | Mosquito Mountains | Washoe County | NV | 41.8082914 | -119.9407700 | 1926 | 242 | 2015 | Jeffress et al. 2017 |
| NDOW-3-662 | Mosquito Mountains | Washoe County | NV | 41.8085554 | -119.9410100 | 1920 | 241 | 2015 | Jeffress et al. 2017 |
| NDOW-3-663 | Mosquito Mountains | Washoe County | NV | 41.7867520 | -119.9106500 | 1907 | 213 | 2015 | Jeffress et al. 2017 |
| NDOW-3-664 | Mosquito Mountains | Washoe County | NV | 41.7867952 | -119.9107200 | 1907 | 213 | 2015 | Jeffress et al. 2017 |
| NDOW-3-665 | Mosquito Mountains | Washoe County | NV | 41.7867101 | -119.9105300 | 1909 | 211 | 2015 | Jeffress et al. 2017 |
| NDOW-3-666 | Mosquito Mountains | Washoe County | NV | 41.7865753 | -119.9101600 | 1908 | 214 | 2015 | Jeffress et al. 2017 |
| NDOW-3-667 | Mosquito Mountains | Washoe County | NV | 41.7866868 | -119.9096700 | 1921 | 213 | 2015 | Jeffress et al. 2017 |
| NDOW-3-668 | Mosquito Mountains | Washoe County | NV | 41.7866346 | -119.9096000 | 1915 | 216 | 2015 | Jeffress et al. 2017 |
| NDOW-3-669 | Mosquito Mountains | Washoe County | NV | 41.7871611 | -119.9097900 | 1922 | 209 | 2015 | Jeffress et al. 2017 |
| NDOW-3-670 | Mosquito Mountains | Washoe County | NV | 41.7872303 | -119.9113200 | 1911 | 210 | 2015 | Jeffress et al. 2017 |
| NDOW-3-671 | Mosquito Mountains | Washoe County | NV | 41.7877632 | -119.9112600 | 1920 | 210 | 2015 | Jeffress et al. 2017 |
| NDOW-3-672 | Mosquito Mountains | Washoe County | NV | 41.7883893 | -119.9117800 | 1921 | 233 | 2015 | Jeffress et al. 2017 |
| NDOW-3-673 | Mosquito Mountains | Washoe County | NV | 41.8300956 | -119.9585700 | 1854 | 210 | 2015 | Jeffress et al. 2017 |
| NDOW-3-674 | Mosquito Mountains | Washoe County | NV | 41.7779651 | -119.9465500 | 1816 | 95  | 2015 | Jeffress et al. 2017 |
| NDOW-3-675 | Mosquito Mountains | Washoe County | NV | 41.7779654 | -119.9465400 | 1816 | 95  | 2015 | Jeffress et al. 2017 |
| NDOW-3-676 | Mosquito Mountains | Washoe County | NV | 41.8042293 | -119.9611000 | 1763 | 86  | 2015 | Jeffress et al. 2017 |
| NDOW-3-677 | Mosquito Mountains | Washoe County | NV | 41.7778805 | -119.9466900 | 1828 | 94  | 2015 | Jeffress et al. 2017 |
| NDOW-3-678 | Mosquito Mountains | Washoe County | NV | 41.8308955 | -119.9603800 | 1836 | 259 | 2015 | Jeffress et al. 2017 |
| NDOW-3-679 | Mosquito Mountains | Washoe County | NV | 41.7922090 | -119.9645100 | 1843 | 69  | 2015 | Jeffress et al. 2017 |
| NDOW-3-680 | Mosquito Mountains | Washoe County | NV | 41.7775449 | -119.9467800 | 1826 | 99  | 2015 | Jeffress et al. 2017 |
| NDOW-3-681 | Mosquito Mountains | Washoe County | NV | 41.7775411 | -119.9465800 | 1816 | 97  | 2015 | Jeffress et al. 2017 |
| NDOW-3-682 | Mosquito Mountains | Washoe County | NV | 41.8286616 | -119.9569100 | 1850 | 250 | 2015 | Jeffress et al. 2017 |
| NDOW-3-683 | Mosquito Mountains | Washoe County | NV | 41.8301316 | -119.9599700 | 1831 | 217 | 2015 | Jeffress et al. 2017 |
| NDOW-3-684 | Mosquito Mountains | Washoe County | NV | 41.8288310 | -119.9576700 | 1838 | 227 | 2015 | Jeffress et al. 2017 |
| NDOW-3-685 | Mosquito Mountains | Washoe County | NV | 41.8300953 | -119.9585900 | 1854 | 210 | 2015 | Jeffress et al. 2017 |
| NDOW-3-686 | Mosquito Mountains | Washoe County | NV | 41.7778637 | -119.9466400 | 1816 | 95  | 2015 | Jeffress et al. 2017 |
| NDOW-3-687 | Mosquito Mountains | Washoe County | NV | 41.8293211 | -119.9582300 | 1843 | 208 | 2015 | Jeffress et al. 2017 |
| NDOW-3-688 | Mosquito Mountains | Washoe County | NV | 41.8301582 | -119.9599900 | 1831 | 217 | 2015 | Jeffress et al. 2017 |
| NDOW-3-689 | Mosquito Mountains | Washoe County | NV | 41.7921103 | -119.9644900 | 1843 | 69  | 2015 | Jeffress et al. 2017 |
| NDOW-3-690 | Mosquito Mountains | Washoe County | NV | 41.7925052 | -119.9642000 | 1818 | 36  | 2015 | Jeffress et al. 2017 |
| NDOW-3-692 | Mosquito Mountains | Washoe County | NV | 41.8286325 | -119.9573400 | 1843 | 232 | 2015 | Jeffress et al. 2017 |
| NDOW-3-693 | Mosquito Mountains | Washoe County | NV | 41.8289244 | -119.9575500 | 1842 | 214 | 2015 | Jeffress et al. 2017 |
| NDOW-3-694 | Mosquito Mountains | Washoe County | NV | 41.7871641 | -119.9103800 | 1916 | 208 | 2015 | Jeffress et al. 2017 |
| NDOW-3-695 | Mosquito Mountains | Washoe County | NV | 41.7871920 | -119.9103500 | 1916 | 208 | 2015 | Jeffress et al. 2017 |
| NDOW-3-697 | Mosquito Mountains | Washoe County | NV | 41.7874247 | -119.9104000 | 1922 | 212 | 2015 | Jeffress et al. 2017 |
| NDOW-3-698 | Mosquito Mountains | Washoe County | NV | 41.7931771 | -119.9108400 | 1914 | 289 | 2015 | Jeffress et al. 2017 |
| NDOW-3-699 | Mosquito Mountains | Washoe County | NV | 41.7921040 | -119.9116100 | 1915 | 291 | 2015 | Jeffress et al. 2017 |
| NDOW-3-700 | Mosquito Mountains | Washoe County | NV | 41.7915194 | -119.9119400 | 1915 | 303 | 2015 | Jeffress et al. 2017 |
| NDOW-3-701 | Mosquito Mountains | Washoe County | NV | 41.7914162 | -119.9121000 | 1911 | 304 | 2015 | Jeffress et al. 2017 |
| NDOW-3-702 | Mosquito Mountains | Washoe County | NV | 41.7915057 | -119.9124800 | 1906 | 307 | 2015 | Jeffress et al. 2017 |
| NDOW-3-703 | Mosquito Mountains | Washoe County | NV | 41.7914607 | -119.9124800 | 1906 | 307 | 2015 | Jeffress et al. 2017 |
| NDOW-3-704 | Mosquito Mountains | Washoe County | NV | 41.7912396 | -119.9126700 | 1906 | 316 | 2015 | Jeffress et al. 2017 |
| NDOW-3-705 | Mosquito Mountains | Washoe County | NV | 41.7907219 | -119.9132000 | 1904 | 302 | 2015 | Jeffress et al. 2017 |
| NDOW-3-707 | Mosquito Mountains | Washoe County | NV | 41.7906466 | -119.9133300 | 1904 | 302 | 2015 | Jeffress et al. 2017 |
| NDOW-3-708 | Mosquito Mountains | Washoe County | NV | 41.7900579 | -119.9134600 | 1905 | 273 | 2015 | Jeffress et al. 2017 |

|            |                     |               |    |            |              |      |     |      |                      |
|------------|---------------------|---------------|----|------------|--------------|------|-----|------|----------------------|
| NDOW-3-709 | Mosquito Mountains  | Washoe County | NV | 41.7888952 | -119.9131400 | 1897 | 241 | 2015 | Jeffress et al. 2017 |
| NDOW-3-710 | Mosquito Mountains  | Washoe County | NV | 41.7890006 | -119.9128900 | 1909 | 240 | 2015 | Jeffress et al. 2017 |
| NDOW-3-723 | Mosquito Mountains  | Washoe County | NV | 41.8273655 | -119.9572300 | 1834 | 296 | 2015 | Jeffress et al. 2017 |
| NDOW-3-724 | Mosquito Mountains  | Washoe County | NV | 41.8267361 | -119.9582400 | 1827 | 308 | 2015 | Jeffress et al. 2017 |
| NDOW-3-725 | Mosquito Mountains  | Washoe County | NV | 41.8256245 | -119.9590900 | 1838 | 321 | 2015 | Jeffress et al. 2017 |
| NDOW-3-726 | Mosquito Mountains  | Washoe County | NV | 41.8254617 | -119.9591200 | 1844 | 315 | 2015 | Jeffress et al. 2017 |
| NDOW-3-727 | Mosquito Mountains  | Washoe County | NV | 41.8247917 | -119.9599600 | 1829 | 290 | 2015 | Jeffress et al. 2017 |
| NDOW-3-729 | Mosquito Mountains  | Washoe County | NV | 41.7735558 | -119.9499200 | 1819 | 155 | 2015 | Jeffress et al. 2017 |
| NDOW-3-730 | Mosquito Mountains  | Washoe County | NV | 41.7635138 | -119.9214200 | 1852 | 271 | 2015 | Jeffress et al. 2017 |
| NDOW-3-780 | Mosquito Mountains  | Washoe County | NV | 41.7867491 | -119.9245800 | 1842 | 237 | 2015 | Jeffress et al. 2017 |
| NDOW-3-781 | Mosquito Mountains  | Washoe County | NV | 41.7862405 | -119.9240400 | 1845 | 249 | 2015 | Jeffress et al. 2017 |
| NDOW-3-782 | Mosquito Mountains  | Washoe County | NV | 41.7215855 | -119.9014400 | 1897 | 286 | 2015 | Jeffress et al. 2017 |
| NDOW-3-784 | Mosquito Mountains  | Washoe County | NV | 41.7050183 | -119.8941700 | 1871 | 74  | 2015 | Jeffress et al. 2017 |
| NDOW-3-785 | Mosquito Mountains  | Washoe County | NV | 41.7051571 | -119.8943800 | 1871 | 74  | 2015 | Jeffress et al. 2017 |
| NDOW-3-786 | Mosquito Mountains  | Washoe County | NV | 41.7022919 | -119.8930000 | 1876 | 52  | 2015 | Jeffress et al. 2017 |
| NDOW-3-787 | Mosquito Mountains  | Washoe County | NV | 41.7207083 | -119.9019400 | 1896 | 275 | 2015 | Jeffress et al. 2017 |
| NDOW-3-788 | Mosquito Mountains  | Washoe County | NV | 41.7023207 | -119.8929300 | 1876 | 52  | 2015 | Jeffress et al. 2017 |
| NDOW-3-789 | Mosquito Mountains  | Washoe County | NV | 41.7021032 | -119.8933400 | 1910 | 51  | 2015 | Jeffress et al. 2017 |
| NDOW-3-790 | Mosquito Mountains  | Washoe County | NV | 41.7023105 | -119.8929800 | 1876 | 52  | 2015 | Jeffress et al. 2017 |
| NDOW-3-791 | Mosquito Mountains  | Washoe County | NV | 41.7020065 | -119.8928900 | 1884 | 62  | 2015 | Jeffress et al. 2017 |
| NDOW-3-792 | Hays Canyon Range   | Washoe County | NV | 41.6590011 | -119.9090400 | 2010 | 339 | 2015 | Jeffress et al. 2017 |
| NDOW-3-793 | Hays Canyon Range   | Washoe County | NV | 41.6611150 | -119.9084300 | 1947 | 61  | 2015 | Jeffress et al. 2017 |
| NDOW-3-794 | Hays Canyon Range   | Washoe County | NV | 41.6612667 | -119.9084800 | 1947 | 61  | 2015 | Jeffress et al. 2017 |
| NDOW-3-795 | Hays Canyon Range   | Washoe County | NV | 41.6611060 | -119.9084300 | 1957 | 32  | 2015 | Jeffress et al. 2017 |
| NDOW-3-796 | Mosquito Mountains  | Washoe County | NV | 41.7206996 | -119.9019300 | 1896 | 275 | 2015 | Jeffress et al. 2017 |
| NDOW-3-797 | Mosquito Mountains  | Washoe County | NV | 41.7209068 | -119.9019300 | 1896 | 283 | 2015 | Jeffress et al. 2017 |
| NDOW-3-798 | Hays Canyon Range   | Washoe County | NV | 41.6592110 | -119.9089300 | 2003 | 331 | 2015 | Jeffress et al. 2017 |
| NDOW-3-799 | Hays Canyon Range   | Washoe County | NV | 41.6590046 | -119.9092600 | 2006 | 329 | 2015 | Jeffress et al. 2017 |
| NDOW-3-800 | Hays Canyon Range   | Washoe County | NV | 41.6592470 | -119.9089300 | 2003 | 331 | 2015 | Jeffress et al. 2017 |
| NDOW-3-801 | Hays Canyon Range   | Washoe County | NV | 41.6612397 | -119.9084800 | 1947 | 61  | 2015 | Jeffress et al. 2017 |
| NDOW-3-802 | Mosquito Mountains  | Washoe County | NV | 41.7261609 | -119.9585900 | 1879 | 55  | 2015 | Jeffress et al. 2017 |
| NDOW-3-803 | Mosquito Mountains  | Washoe County | NV | 41.7264831 | -119.9590200 | 1886 | 52  | 2015 | Jeffress et al. 2017 |
| NDOW-3-820 | Mosquito Mountains  | Washoe County | NV | 41.7300042 | -119.9252900 | 1909 | 209 | 2015 | Jeffress et al. 2017 |
| NDOW-3-821 | Mosquito Mountains  | Washoe County | NV | 41.7300020 | -119.9253700 | 1909 | 209 | 2015 | Jeffress et al. 2017 |
| NDOW-3-822 | Mosquito Mountains  | Washoe County | NV | 41.7301720 | -119.9254200 | 1909 | 209 | 2015 | Jeffress et al. 2017 |
| NDOW-3-823 | Mosquito Mountains  | Washoe County | NV | 41.7093265 | -119.9481900 | 1840 | 284 | 2015 | Jeffress et al. 2017 |
| NDOW-3-824 | Mosquito Mountains  | Washoe County | NV | 41.7193613 | -119.9074800 | 1912 | 106 | 2015 | Jeffress et al. 2017 |
| NDOW-3-825 | Mosquito Mountains  | Washoe County | NV | 41.7196576 | -119.9075200 | 1919 | 104 | 2015 | Jeffress et al. 2017 |
| NDOW-3-826 | Mosquito Mountains  | Washoe County | NV | 41.6903620 | -119.9263000 | 1927 | 149 | 2015 | Jeffress et al. 2017 |
| NDOW-3-827 | Mosquito Mountains  | Washoe County | NV | 41.6903931 | -119.9265000 | 1933 | 142 | 2015 | Jeffress et al. 2017 |
| NDOW-3-828 | Mosquito Mountains  | Washoe County | NV | 41.6901874 | -119.9264400 | 1924 | 145 | 2015 | Jeffress et al. 2017 |
| NDOW-3-829 | Mosquito Mountains  | Washoe County | NV | 41.6900674 | -119.9265500 | 1924 | 145 | 2015 | Jeffress et al. 2017 |
| NDOW-3-830 | Mosquito Mountains  | Washoe County | NV | 41.6897632 | -119.9268300 | 1921 | 145 | 2015 | Jeffress et al. 2017 |
| NDOW-3-831 | Mosquito Mountains  | Washoe County | NV | 41.6897363 | -119.9268300 | 1921 | 145 | 2015 | Jeffress et al. 2017 |
| NDOW-3-854 | Mosquito Mountains  | Washoe County | NV | 41.6846603 | -119.9298800 | 1872 | 153 | 2015 | Jeffress et al. 2017 |
| NDOW-3-883 | Mosquito Mountains  | Washoe County | NV | 41.6914066 | -119.9481300 | 1938 | 288 | 2015 | Jeffress et al. 2017 |
| NDOW-3-890 | Mosquito Mountains  | Washoe County | NV | 41.6810547 | -119.9345900 | 1901 | 136 | 2015 | Jeffress et al. 2017 |
| NDOW-3-892 | Mosquito Mountains  | Washoe County | NV | 41.6944965 | -119.9273300 | 1991 | 57  | 2015 | Jeffress et al. 2017 |
| NDOW-3-896 | Painted Point Range | Washoe County | NV | 41.9946195 | -119.7394900 | 1863 | 252 | 2015 | Jeffress et al. 2017 |

|            |                     |               |    |            |              |      |     |      |                      |
|------------|---------------------|---------------|----|------------|--------------|------|-----|------|----------------------|
| NDOW-3-900 | Painted Point Range | Washoe County | NV | 41.9949124 | -119.7381600 | 1933 | 251 | 2015 | Jeffress et al. 2017 |
| NDOW-3-901 | Painted Point Range | Washoe County | NV | 41.9944126 | -119.7394800 | 1861 | 264 | 2015 | Jeffress et al. 2017 |
| NDOW-3-902 | Painted Point Range | Lake County   | OR | 41.9998345 | -119.7417100 | 1841 | 255 | 2015 | Jeffress et al. 2017 |
| NDOW-3-903 | Painted Point Range | Lake County   | OR | 42.0000780 | -119.7417000 | 1844 | 255 | 2015 | Jeffress et al. 2017 |
| NDOW-3-904 | Painted Point Range | Lake County   | OR | 41.9998528 | -119.7417000 | 1841 | 255 | 2015 | Jeffress et al. 2017 |
| NDOW-3-906 | Painted Point Range | Washoe County | NV | 41.9292367 | -119.6447600 | 1795 | 323 | 2015 | Jeffress et al. 2017 |
| NDOW-3-907 | Painted Point Range | Washoe County | NV | 41.9300295 | -119.6435800 | 1800 | 310 | 2015 | Jeffress et al. 2017 |
| NDOW-3-908 | Painted Point Range | Washoe County | NV | 41.9295853 | -119.6425400 | 1832 | 318 | 2015 | Jeffress et al. 2017 |
| NDOW-3-909 | Painted Point Range | Washoe County | NV | 41.9292151 | -119.6429700 | 1834 | 318 | 2015 | Jeffress et al. 2017 |
| NDOW-3-910 | Painted Point Range | Washoe County | NV | 41.9289739 | -119.6440500 | 1817 | 329 | 2015 | Jeffress et al. 2017 |
| NDOW-3-912 | Hays Canyon Range   | Washoe County | NV | 41.5520601 | -119.9361400 | 2217 | 260 | 2015 | Jeffress et al. 2017 |
| NDOW-3-913 | Hays Canyon Range   | Washoe County | NV | 41.5521309 | -119.9361900 | 2217 | 260 | 2015 | Jeffress et al. 2017 |
| NDOW-3-914 | Hays Canyon Range   | Washoe County | NV | 41.5520197 | -119.9359600 | 2233 | 264 | 2015 | Jeffress et al. 2017 |
| NDOW-3-917 | Hays Canyon Range   | Washoe County | NV | 41.5520633 | -119.9363700 | 2217 | 260 | 2015 | Jeffress et al. 2017 |
| NDOW-3-920 | Hays Canyon Range   | Washoe County | NV | 41.5499280 | -119.9374600 | 2126 | 247 | 2015 | Jeffress et al. 2017 |
| NDOW-3-921 | Hays Canyon Range   | Washoe County | NV | 41.5498006 | -119.9375100 | 2111 | 246 | 2015 | Jeffress et al. 2017 |
| NDOW-3-923 | Hays Canyon Range   | Washoe County | NV | 41.5497625 | -119.9375900 | 2111 | 246 | 2015 | Jeffress et al. 2017 |
| NDOW-3-932 | High Rock           | Washoe County | NV | 41.4012969 | -119.5999300 | 1939 | 16  | 2015 | Jeffress et al. 2017 |
| NDOW-3-933 | High Rock           | Washoe County | NV | 41.4012454 | -119.5998200 | 1939 | 16  | 2015 | Jeffress et al. 2017 |
| NDOW-3-934 | High Rock           | Washoe County | NV | 41.4012443 | -119.5998700 | 1939 | 16  | 2015 | Jeffress et al. 2017 |
| NDOW-3-935 | High Rock           | Washoe County | NV | 41.4013228 | -119.5999800 | 1939 | 16  | 2015 | Jeffress et al. 2017 |
| NDOW-3-936 | High Rock           | Washoe County | NV | 41.4013615 | -119.5998600 | 1939 | 16  | 2015 | Jeffress et al. 2017 |
| NDOW-3-938 | High Rock           | Washoe County | NV | 41.4243676 | -119.5941100 | 1885 | 213 | 2015 | Jeffress et al. 2017 |
| NDOW-3-939 | High Rock           | Washoe County | NV | 41.3900003 | -119.5976500 | 1932 | 7   | 2015 | Jeffress et al. 2017 |
| NDOW-3-940 | High Rock           | Washoe County | NV | 41.4013885 | -119.5998600 | 1939 | 16  | 2015 | Jeffress et al. 2017 |
| NDOW-3-941 | High Rock           | Washoe County | NV | 41.4244478 | -119.5941500 | 1895 | 216 | 2015 | Jeffress et al. 2017 |
| NDOW-3-942 | High Rock           | Washoe County | NV | 41.4245904 | -119.5942200 | 1888 | 217 | 2015 | Jeffress et al. 2017 |
| NDOW-3-943 | High Rock           | Washoe County | NV | 41.4254700 | -119.5951500 | 1892 | 219 | 2015 | Jeffress et al. 2017 |
| NDOW-3-944 | High Rock           | Washoe County | NV | 41.4254515 | -119.5951800 | 1892 | 219 | 2015 | Jeffress et al. 2017 |
| NDOW-3-945 | High Rock           | Washoe County | NV | 41.4254008 | -119.5950300 | 1892 | 219 | 2015 | Jeffress et al. 2017 |
| NDOW-3-946 | High Rock           | Washoe County | NV | 41.4251621 | -119.5948300 | 1891 | 221 | 2015 | Jeffress et al. 2017 |
| NDOW-3-947 | High Rock           | Washoe County | NV | 41.4014680 | -119.6003300 | 1936 | 15  | 2015 | Jeffress et al. 2017 |
| NDOW-3-948 | High Rock           | Washoe County | NV | 41.4013756 | -119.6004400 | 1943 | 10  | 2015 | Jeffress et al. 2017 |
| NDOW-3-949 | High Rock           | Washoe County | NV | 41.4013895 | -119.6006200 | 1938 | 9   | 2015 | Jeffress et al. 2017 |
| NDOW-3-950 | High Rock           | Washoe County | NV | 41.4013887 | -119.6006500 | 1944 | 6   | 2015 | Jeffress et al. 2017 |
| NDOW-3-951 | High Rock           | Washoe County | NV | 41.4013072 | -119.6006700 | 1944 | 6   | 2015 | Jeffress et al. 2017 |
| NDOW-3-952 | High Rock           | Washoe County | NV | 41.4012842 | -119.6004900 | 1943 | 10  | 2015 | Jeffress et al. 2017 |
| NDOW-3-953 | High Rock           | Washoe County | NV | 41.4014609 | -119.6002500 | 1935 | 14  | 2015 | Jeffress et al. 2017 |
| NDOW-3-963 | High Rock           | Washoe County | NV | 41.3938862 | -119.6149600 | 2081 | 231 | 2015 | Jeffress et al. 2017 |
| NDOW-3-964 | High Rock           | Washoe County | NV | 41.3934979 | -119.6154000 | 2061 | 260 | 2015 | Jeffress et al. 2017 |
| NDOW-3-965 | High Rock           | Washoe County | NV | 41.3952893 | -119.6190000 | 1949 | 225 | 2015 | Jeffress et al. 2017 |
| NDOW-3-966 | High Rock           | Washoe County | NV | 41.3938971 | -119.6216000 | 1905 | 193 | 2015 | Jeffress et al. 2017 |
| NDOW-3-967 | High Rock           | Washoe County | NV | 41.3934971 | -119.6154300 | 2061 | 260 | 2015 | Jeffress et al. 2017 |
| NDOW-3-968 | Painted Point Range | Washoe County | NV | 41.6737953 | -119.7088300 | 1892 | 234 | 2015 | Jeffress et al. 2017 |
| NDOW-3-969 | Painted Point Range | Washoe County | NV | 41.6724016 | -119.7083500 | 1873 | 214 | 2015 | Jeffress et al. 2017 |
| NDOW-3-970 | High Rock           | Washoe County | NV | 41.3937883 | -119.6216300 | 1901 | 240 | 2015 | Jeffress et al. 2017 |
| NDOW-3-971 | High Rock           | Washoe County | NV | 41.3942030 | -119.6212100 | 1913 | 182 | 2015 | Jeffress et al. 2017 |
| NDOW-3-972 | High Rock           | Washoe County | NV | 41.3934865 | -119.6155000 | 2061 | 260 | 2015 | Jeffress et al. 2017 |
| NDOW-3-973 | Painted Point Range | Washoe County | NV | 41.6734219 | -119.7090100 | 1886 | 223 | 2015 | Jeffress et al. 2017 |

|            |                     |                     |    |            |              |      |     |           |                                        |
|------------|---------------------|---------------------|----|------------|--------------|------|-----|-----------|----------------------------------------|
| NDOW-3-974 | Painted Point Range | Washoe County       | NV | 41.6732658 | -119.7091400 | 1881 | 214 | 2015      | Jeffress et al. 2017                   |
| NDOW-3-975 | High Rock           | Washoe County       | NV | 41.3937671 | -119.6217700 | 1898 | 212 | 2015      | Jeffress et al. 2017                   |
| NDOW-3-976 | High Rock           | Washoe County       | NV | 41.3942041 | -119.6211600 | 1913 | 182 | 2015      | Jeffress et al. 2017                   |
| NDOW-3-977 | High Rock           | Washoe County       | NV | 41.3948460 | -119.6198800 | 1932 | 220 | 2015      | Jeffress et al. 2017                   |
| NDOW-3-978 | High Rock           | Washoe County       | NV | 41.3951601 | -119.6195300 | 1939 | 206 | 2015      | Jeffress et al. 2017                   |
| NDOW-3-979 | High Rock           | Washoe County       | NV | 41.3936209 | -119.6151400 | 2075 | 251 | 2015      | Jeffress et al. 2017                   |
| NDOW-3-980 | Painted Point Range | Washoe County       | NV | 41.6726474 | -119.7078600 | 1886 | 218 | 2015      | Jeffress et al. 2017                   |
| NDOW-3-981 | High Rock           | Washoe County       | NV | 41.3940811 | -119.6151000 | 2078 | 274 | 2015      | Jeffress et al. 2017                   |
| NDOW-3-982 | High Rock           | Washoe County       | NV | 41.3952255 | -119.6194200 | 1942 | 235 | 2015      | Jeffress et al. 2017                   |
| NDOW-3-983 | High Rock           | Washoe County       | NV | 41.3938409 | -119.6149700 | 2081 | 231 | 2015      | Jeffress et al. 2017                   |
| NDOW-3-984 | High Rock           | Washoe County       | NV | 41.3940293 | -119.6150000 | 2081 | 270 | 2015      | Jeffress et al. 2017                   |
| NDOW-3-985 | High Rock           | Washoe County       | NV | 41.3938769 | -119.6149700 | 2081 | 231 | 2015      | Jeffress et al. 2017                   |
| NDOW-3-990 | Painted Point Range | Washoe County       | NV | 41.6750560 | -119.7103600 | 1895 | 201 | 2015      | Jeffress et al. 2017                   |
| NDOW-3-991 | Painted Point Range | Washoe County       | NV | 41.6752059 | -119.7101200 | 1897 | 204 | 2015      | Jeffress et al. 2017                   |
| NDOW-3-992 | Painted Point Range | Washoe County       | NV | 41.6544410 | -119.7711400 | 1770 | 290 | 2015      | Jeffress et al. 2017                   |
| NDOW-3-996 | High Rock           | Washoe County       | NV | 41.3853984 | -119.6119500 | 1970 | 248 | 2015      | Jeffress et al. 2017                   |
| NDOW-3-997 | Hays Canyon Range   | Washoe County       | NV | 41.3645701 | -119.9541600 | 2120 | 310 | 2015      | Jeffress et al. 2017                   |
| NDOW-3-998 | Hays Canyon Range   | Washoe County       | NV | 41.3574332 | -119.8693100 | 1942 | 226 | 2015      | Jeffress et al. 2017                   |
| NDOW-3-999 | Hays Canyon Range   | Washoe County       | NV | 41.3647038 | -119.9542100 | 2111 | 302 | 2015      | Jeffress et al. 2017                   |
| NDOW-4-001 | Carson Range        | Carson City County  | NV | 39.1531506 | -119.8750700 | 2740 | 292 | 2015      | NDOW Unpublished, accessed March, 2016 |
| NDOW-4-002 | Carson Range        | Carson City County  | NV | 39.1531766 | -119.8747500 | 2749 | 288 | 2015      | NDOW Unpublished, accessed March, 2016 |
| NDOW-4-003 | Carson Range        | Carson City County  | NV | 39.1523130 | -119.8728700 | 2774 | 358 | 2015      | NDOW Unpublished, accessed March, 2016 |
| NDOW-4-004 | Carson Range        | Carson City County  | NV | 39.1537270 | -119.8739800 | 2738 | 9   | 2015      | NDOW Unpublished, accessed March, 2016 |
| NDOW-4-005 | Carson Range        | Washoe County       | NV | 39.1871019 | -119.8959000 | 2639 | 257 | 2015      | NDOW Unpublished, accessed March, 2016 |
| NDOW-4-006 | Carson Range        | Washoe County       | NV | 39.1893769 | -119.8953500 | 2654 | 327 | 2015      | NDOW Unpublished, accessed March, 2016 |
| NDOW-4-007 | Carson Range        | Washoe County       | NV | 39.1892225 | -119.8954000 | 2654 | 327 | 2015      | NDOW Unpublished, accessed March, 2016 |
| NDOW-4-008 | Carson Range        | Washoe County       | NV | 39.1957818 | -119.8837400 | 2483 | 313 | 2015      | NDOW Unpublished, accessed March, 2016 |
| NDOW-4-013 | Carson Range        | Washoe County       | NV | 39.2777351 | -119.9622200 | 2487 | 221 | 2015      | NDOW Unpublished, accessed March, 2016 |
| NDOW-5-066 | Carson Range        | Snowflower Mountain | NV | 39.3828855 | -119.9365100 | 3085 | 306 | 2014      | NDOW Unpublished, accessed March, 2016 |
| NDOW-5-067 | Carson Range        | Snowflower Mountain | NV | 39.3828286 | -119.9366200 | 3085 | 306 | 2014      | NDOW Unpublished, accessed March, 2016 |
| NDOW-5-068 | Carson Range        | Snowflower Mountain | NV | 39.3832026 | -119.9375100 | 3035 | 297 | 2014      | NDOW Unpublished, accessed March, 2016 |
| O-CB001    | Sheldon Plateau     | Blowout Mountain    | NV | 41.722     | -119.270     | 2029 | 137 | 2009-2011 | Collins & Bauman 2012                  |
| O-CB002    | Hart Mountains      | Calderwood Ranch    | OR | 42.381     | -119.764     | 2056 | 90  | 2009-2011 | Collins & Bauman 2012                  |
| O-CB003    | Hart Mountains      | DeGarmo Canyon      | OR | 42.480     | -119.764     | 2079 | 182 | 2009-2011 | Collins & Bauman 2012                  |
| O-CB004    | Sheldon Plateau     | Echo Canyon         | NV | 41.848     | -119.278     | 1870 | 312 | 2009-2011 | Collins & Bauman 2012                  |
| O-CB005    | Sheldon Plateau     | Fish Creek          | NV | 41.807     | -119.363     | 1949 | 299 | 2009-2011 | Collins & Bauman 2012                  |
| O-CB006    | Sheldon Plateau     | Fish Creek Mountain | NV | 41.750     | -119.346     | 2021 | 345 | 2009-2011 | Collins & Bauman 2012                  |
| O-CB007    | Sheldon Plateau     | Fish Creek Spring   | NV | 41.761     | -119.382     | 1946 | 71  | 2009-2011 | Collins & Bauman 2012                  |
| O-CB008    | Hart Mountains      | Goat Creek          | OR | 42.414     | -119.764     | 2238 | 156 | 2009-2011 | Collins & Bauman 2012                  |
| O-CB009    | Hart Mountains      | Hart Mountain       | OR | 42.557     | -119.708     | 1964 | 270 | 2009-2011 | Collins & Bauman 2012                  |
| O-CB010    | Sheldon Plateau     | Horse Canyon        | NV | 41.774     | -119.352     | 1839 | 342 | 2009-2011 | Collins & Bauman 2012                  |
| O-CB011    | Sheldon Plateau     | Mahogany Mountain   | NV | 41.608     | -119.213     | 1908 | 124 | 2009-2011 | Collins & Bauman 2012                  |
| O-CB012    | Massacre Rim        | na                  | NV | 41.756     | -119.700     | 1834 | 173 | 2009-2011 | Collins & Bauman 2012                  |
| O-CB013    | Hart Mountains      | Warner Creek        | OR | 41.392     | -119.747     | 1824 | 19  | 2009-2011 | Collins & Bauman 2012                  |
| O-CB014    | Hart Mountains      | Willow Creek        | OR | 42.539     | -119.700     | 1930 | 91  | 2009-2011 | Collins & Bauman 2012                  |
| O-CB015    | Sheldon Plateau     | Catnip Canyon       | NV | 41.924     | -119.392     | 1874 | 53  | 2009-2011 | Collins & Bauman 2012                  |
| O-CB016    | Sheldon Plateau     | Guano Rim           | NV | 41.974     | -119.489     | 1897 | 299 | 2009-2011 | Collins & Bauman 2012                  |
| O-CB017    | Sheldon Plateau     | Rock Springs Table  | NV | 41.686     | -119.113     | 2000 | 237 | 2009-2011 | Collins & Bauman 2012                  |
| O-CB018    | Sheldon Plateau     | Spanish Flat        | NV | 42.400     | -119.675     | 1806 | 207 | 2009-2011 | Collins & Bauman 2012                  |

|         |                  |                                        |    |          |           |      |     |           |                       |
|---------|------------------|----------------------------------------|----|----------|-----------|------|-----|-----------|-----------------------|
| O-CB019 | Hart Mountains   | Swan Canyon                            | OR | 41.907   | -119.494  | 1769 | 257 | 2009-2011 | Collins & Bauman 2012 |
| O-CM001 | Bodie Mountains  | Sugarloaf Mtn                          | CA | 38.18880 | 119.00957 | 2602 | 1   | 2007      | Millar unpublished    |
| O-CM002 | Bodie Mountains  | Sugarloaf Mtn                          | CA | 38.18875 | 119.00960 | 2603 | 1   | 2007      | Millar unpublished    |
| O-CM003 | Bodie Mountains  | Sugarloaf Mtn                          | CA | 38.18867 | 119.00963 | 2602 | 1   | 2007      | Millar unpublished    |
| O-CM004 | Bodie Mountains  | Sugarloaf Mtn                          | CA | 38.18877 | 119.00903 | 2594 | 32  | 2007      | Millar unpublished    |
| O-CM005 | Bodie Mountains  | Sugarloaf Mtn                          | CA | 38.18707 | 119.00815 | 2570 | 118 | 2007      | Millar unpublished    |
| O-CM006 | Bodie Mountains  | Aurora minesite                        | NV | 38.30408 | 118.90148 | 2113 | 288 | 2007      | Millar unpublished    |
| O-CM008 | Bodie Mountains  | Chemung Mine                           | CA | 38.34990 | 119.14907 | 2496 | 217 | 2008      | Millar unpublished    |
| O-CM009 | Bodie Mountains  | Chemung Mine                           | CA | 38.35053 | 119.14793 | 2525 | 180 | 2008      | Millar unpublished    |
| O-CM017 | Sierra Nevada    | Parker Cr Cyn                          | CA | 37.84053 | 119.14723 | 2520 | 322 | 2008      | Millar unpublished    |
| O-CM026 | Bodie Mountains  | Masonic Mtn                            | CA | 38.32555 | 119.14253 | 2602 | 259 | 2009      | Millar unpublished    |
| O-CM032 | Bodie Mountains  | Aurora Cyn                             | CA | 38.27987 | 119.11732 | 2590 | 160 | 2010      | Millar unpublished    |
| O-CM033 | Bodie Mountains  | Brawley Pks                            | NV | 38.27538 | 118.90040 | 2403 | 4   | 2010      | Millar unpublished    |
| O-CM034 | Bodie Mountains  | Brawley Pks                            | NV | 38.27402 | 118.90078 | 2433 | 352 | 2010      | Millar unpublished    |
| O-CM035 | Bodie Mountains  | Brawley Pks                            | NV | 38.27317 | 118.89875 | 2455 | 25  | 2010      | Millar unpublished    |
| O-CM036 | Bodie Mountains  | Brawley Pks                            | NV | 38.27213 | 118.89898 | 2509 | 21  | 2010      | Millar unpublished    |
| O-CM037 | Bodie Mountains  | Aurora Cyn                             | CA | 38.27987 | 119.11732 | 2590 | 160 | 2010      | Millar unpublished    |
| O-CM038 | Bodie Mountains  | Aurora Cyn                             | CA | 38.28240 | 119.11702 | 2684 | 131 | 2010      | Millar unpublished    |
| O-CM039 | Glass Mountains  | Cougar Peak                            | OR | 42.30875 | 120.63613 | 2307 | 307 | 2010      | Millar unpublished    |
| O-CM040 | Glass Mountains  | Cougar Peak                            | OR | 42.28978 | 120.65290 | 1947 | 235 | 2010      | Millar unpublished    |
| O-CM041 | Sheldon Plateau  | Summit Lk                              | NV | 41.60000 | 119.07502 | 1892 | 249 | 2010      | Millar unpublished    |
| O-CM042 | Sheldon Plateau  | Summit Lk                              | NV | 41.59937 | 119.07560 | 1882 | 329 | 2010      | Millar unpublished    |
| O-CM043 | Sheldon Plateau  | Summit Lk                              | NV | 41.59750 | 119.07768 | 1857 | 235 | 2010      | Millar unpublished    |
| O-CM044 | Sheldon Plateau  | Summit Lk                              | NV | 41.59652 | 119.07827 | 1843 | 277 | 2010      | Millar unpublished    |
| O-CM045 | Sheldon Plateau  | Summit Lk                              | NV | 41.59488 | 119.07813 | 1859 | 263 | 2010      | Millar unpublished    |
| O-CM046 | Sheldon Plateau  | Summit Lk                              | NV | 41.59472 | 119.07812 | 1851 | 266 | 2010      | Millar unpublished    |
| O-CM047 | Sheldon Plateau  | Barrel Spgs                            | NV | 41.90782 | 119.96288 | 1667 | 221 | 2010      | Millar unpublished    |
| O-CM048 | Glass Mountains  | Thomas Cr Ranger Stn                   | OR | 42.39677 | 120.60205 | 1711 | 180 | 2010      | Millar unpublished    |
| O-CM050 | Sierra Nevada    | Molybdenite Cyn                        | CA | 38.24495 | 119.43394 | 2768 | 312 | 2010      | Millar unpublished    |
| O-CM057 | Sierra Nevada    | Parker Lk                              | CA | 37.83088 | 119.15893 | 2609 | 334 | 2010      | Millar unpublished    |
| O-CM059 | Winter Ridge     | Slide Mtn, Summer Lk area              | OR | 42.68567 | 120.73912 | 1967 | 5   | 2010      | Millar unpublished    |
| O-CM060 | Winter Ridge     | Slide Mtn, Summer Lk area              | OR | 42.68548 | 120.73887 | 1961 | 23  | 2010      | Millar unpublished    |
| O-CM061 | Winter Ridge     | Slide Mtn, Summer Lk area              | OR | 42.68533 | 120.73895 | 1964 | 13  | 2010      | Millar unpublished    |
| O-CM062 | Winter Ridge     | Slide Mtn, Summer Lk area              | OR | 42.68475 | 120.73613 | 1960 | 347 | 2010      | Millar unpublished    |
| O-CM063 | Winter Ridge     | Slide Mtn, Summer Lk area              | OR | 42.68560 | 120.74000 | 1935 | 25  | 2010      | Millar unpublished    |
| O-CM066 | Bodie Mountains  | Aurora townsite; NE slope E Brawley Pk | NV | 38.27722 | 118.90147 | 2338 | 342 | 2011      | Millar unpublished    |
| O-CM067 | Bodie Mountains  | Bridgeport Cyn                         | CA | 38.13298 | 119.07758 | 2513 | 347 | 2011      | Millar unpublished    |
| O-CM068 | Bodie Mountains  | Bridgeport Cyn                         | CA | 38.13308 | 119.07837 | 2512 | 309 | 2011      | Millar unpublished    |
| O-CM069 | Bodie Mountains  | Bridgeport Cyn                         | CA | 38.13275 | 119.07842 | 2518 | 307 | 2011      | Millar unpublished    |
| O-CM070 | Bodie Mountains  | Bridgeport Cyn                         | CA | 38.13635 | 119.08138 | 2519 | 155 | 2011      | Millar unpublished    |
| O-CM071 | Bodie Mountains  | Chemung Mine                           | CA | 38.35055 | 119.14740 | 2526 | 162 | 2011      | Millar unpublished    |
| O-CM072 | Bodie Mountains  | Aurora Pk                              | NV | 38.28037 | 118.85682 | 2552 | 68  | 2011      | Millar unpublished    |
| O-CM073 | Bodie Mountains  | Masonic Mtn NE                         | NV | 38.35840 | 119.14453 | 2463 | 4   | 2011      | Millar unpublished    |
| O-CM074 | Bodie Mountains  | Masonic Mtn NE                         | NV | 38.35840 | 119.14415 | 2464 | 11  | 2011      | Millar unpublished    |
| O-CM075 | Bodie Mountains  | Masonic Mtn NE                         | NV | 38.35848 | 119.14387 | 2458 | 5   | 2011      | Millar unpublished    |
| O-CM076 | Bodie Mountains  | Masonic Mtn NE                         | NV | 38.35867 | 119.14393 | 2447 | 12  | 2011      | Millar unpublished    |
| O-CM077 | Bodie Mountains  | Masonic Mtn NE                         | NV | 38.35855 | 119.13773 | 2495 | 342 | 2011      | Millar unpublished    |
| O-CM078 | Bodie Mountains  | Brawley Pks Summit                     | NV | 38.25528 | 118.90945 | 2847 | 78  | 2011      | Millar unpublished    |
| O-CM079 | Madeline Uplands | Three Peaks                            | CA | 40.91498 | 120.47393 | 1837 | 199 | 2011      | Millar unpublished    |

|         |                      |                               |    |           |             |      |     |      |                    |
|---------|----------------------|-------------------------------|----|-----------|-------------|------|-----|------|--------------------|
| O-CM080 | Madeline Uplands     | Three Peaks                   | CA | 40.92620  | 120.46540   | 1825 | 202 | 2011 | Millar unpublished |
| O-CM081 | Madeline Uplands     | Three Peaks                   | CA | 40.92617  | 120.46538   | 1825 | 202 | 2011 | Millar unpublished |
| O-CM082 | Madeline Uplands     | Three Peaks                   | CA | 40.93162  | 120.46020   | 1924 | 171 | 2011 | Millar unpublished |
| O-CM083 | Madeline Uplands     | Termo Buttes                  | CA | 40.85733  | 120.48868   | 1628 | 95  | 2011 | Millar unpublished |
| O-CM084 | Madeline Uplands     | Termo Buttes                  | CA | 40.85740  | 120.48882   | 1630 | 95  | 2011 | Millar unpublished |
| O-CM086 | Madeline Uplands     | E of Termo                    | CA | 41.02068  | 120.48178   | 1648 | 272 | 2011 | Millar unpublished |
| O-CM087 | Madeline Uplands     | E of Termo                    | CA | 41.01975  | 120.48147   | 1646 | 256 | 2011 | Millar unpublished |
| O-CM088 | Bodie Mountains      | Masonic Mtn NE                | CA | 38.34988  | 119.11787   | 2717 | 14  | 2012 | Millar unpublished |
| O-CM089 | Bodie Mountains      | Masonic Mtn NE                | CA | 38.34930  | 119.12785   | 2740 | 18  | 2012 | Millar unpublished |
| O-CM090 | Bodie Mountains      | Masonic Mtn NE                | CA | 38.34903  | 119.12783   | 2756 | 20  | 2012 | Millar unpublished |
| O-CM091 | Bodie Mountains      | Masonic Mtn NE                | CA | 38.34847  | 119.12780   | 2760 | 78  | 2012 | Millar unpublished |
| O-CM093 | Glass Mountains      | Kelty Ridge                   | CA | 37.74613  | 118.65362   | 3039 | 255 | 2012 | Millar unpublished |
| O-CM094 | Pine Forest Range    | Duffer Peak                   | NV | 41.66572  | 118.72895   | 2538 | 10  | 2012 | Millar unpublished |
| O-CM095 | Pine Forest Range    | Duffer Peak                   | NV | 41.66560  | 118.72880   | 2536 | 5   | 2012 | Millar unpublished |
| O-CM096 | Pine Forest Range    | Duffer Peak                   | NV | 41.66462  | 118.72703   | 2584 | 4   | 2012 | Millar unpublished |
| O-CM099 | Mono Craters         | N coulee SR120 near The Pines | CA | 37.90997  | 119.00342   | 2112 | 342 | 2013 | Millar unpublished |
| O-CM100 | Pine Forest Range    | Middle Fk Big Creek           | NV | 41.67673  | 118.70895   | 2560 | 18  | 2013 | Millar unpublished |
| O-CM101 | Pine Forest Range    | Middle Fk Big Creek           | NV | 41.67648  | 118.70907   | 2573 | 18  | 2013 | Millar unpublished |
| O-CM102 | Pine Forest Range    | Middle Fk Big Creek           | NV | 41.67592  | 118.70813   | 2598 | 12  | 2013 | Millar unpublished |
| O-CM103 | Pine Forest Range    | Eagle Bog                     | NV | 41.66502  | 118.72738   | 2562 | 341 | 2013 | Millar unpublished |
| O-CM104 | Pine Forest Range    | Blue Lk Cirque                | NV | 41.67552  | 118.71443   | 2554 | 355 | 2013 | Millar unpublished |
| O-CM105 | Sierra Nevada        | SR 88 below campground        | CA | 38.77775  | 119.88974   | 2104 | 181 | 2013 | Millar unpublished |
| O-CM109 | Wassuk Mountains     | Lapon Cyn                     | NV | 38.53955  | 118.83110   | 2760 | 240 | 2013 | Millar unpublished |
| O-CM110 | Wassuk Mountains     | South Canyon                  | NV | 38.44115  | 118.76273   | 2718 | 341 | 2013 | Millar unpublished |
| O-CM111 | Wassuk Mountains     | South Canyon                  | NV | 38.44110  | 118.76267   | 2730 | 341 | 2013 | Millar unpublished |
| O-CM112 | Sweetwater Mountains | Sweetwater Cyn                | NV | 38.47915  | 119.25172   | 2249 | 341 | 2014 | Millar unpublished |
| O-CM113 | Bodie Mountains      | Mt Biedeman                   | CA | 38.147983 | -119.069450 | 2610 | 239 | 2015 | Millar unpublished |
| O-CM114 | Bodie Mountains      | Mt Biedeman                   | CA | 38.147800 | -119.069683 | 2602 | 239 | 2015 | Millar unpublished |
| O-CM115 | Bodie Mountains      | Mt Biedeman                   | CA | 38.147667 | -119.069900 | 2596 | 235 | 2015 | Millar unpublished |
| O-CM116 | Bodie Mountains      | Mt Biedeman                   | CA | 38.147600 | -119.069917 | 2593 | 235 | 2015 | Millar unpublished |
| O-CM117 | Bodie Mountains      | Mt Biedeman                   | CA | 38.147750 | -119.069500 | 2608 | 243 | 2015 | Millar unpublished |
| O-CM118 | Bodie Mountains      | Mt Biedeman                   | CA | 38.147533 | -119.068550 | 2653 | 243 | 2015 | Millar unpublished |
| O-CM119 | Bodie Mountains      | Mt Biedeman                   | CA | 38.148250 | -119.068450 | 2653 | 237 | 2015 | Millar unpublished |
| O-CM120 | Bodie Mountains      | Mt Biedeman                   | CA | 38.148300 | -119.067950 | 2666 | 195 | 2015 | Millar unpublished |
| O-CM121 | Bodie Mountains      | Mt Biedeman                   | CA | 38.148967 | -119.068433 | 2648 | 249 | 2015 | Millar unpublished |
| O-CM122 | Bodie Mountains      | Mt Biedeman                   | CA | 38.148883 | -119.068517 | 2645 | 262 | 2015 | Millar unpublished |
| O-CM123 | Bodie Mountains      | Mt Biedeman                   | CA | 38.148933 | -119.068600 | 2640 | 249 | 2015 | Millar unpublished |
| O-CM124 | Bodie Mountains      | Mt Biedeman                   | CA | 38.148900 | -119.068567 | 2640 | 249 | 2015 | Millar unpublished |
| O-CM125 | Bodie Mountains      | Mt Biedeman                   | CA | 38.148550 | -119.068700 | 2625 | 250 | 2015 | Millar unpublished |
| O-CM126 | Bodie Mountains      | Masonic Mtn East              | CA | 38.34848  | 119.12772   | 2759 | 88  | 2015 | Millar unpublished |
| O-CM127 | Bodie Mountains      | Masonic Mtn East              | CA | 38.34812  | 119.12775   | 2754 | 100 | 2015 | Millar unpublished |
| O-CM128 | Bodie Mountains      | Masonic Mtn East              | CA | 38.34845  | 119.12813   | 2747 | 354 | 2015 | Millar unpublished |
| O-CM129 | Bodie Mountains      | Masonic Mtn East              | CA | 38.34858  | 119.12802   | 2759 | 78  | 2015 | Millar unpublished |
| O-CM130 | Monitor Range        | Greenmonster Cyn              | NV | 38.74548  | 116.55082   | 2517 | 54  | 2015 | Millar unpublished |
| O-CM131 | Monitor Range        | Greenmonster Cyn              | NV | 38.74593  | 116.55083   | 2491 | 64  | 2015 | Millar unpublished |
| O-CM132 | Monitor Range        | Greenmonster Cyn              | NV | 38.74593  | 116.55063   | 2483 | 64  | 2015 | Millar unpublished |
| O-CM133 | Monitor Range        | Greenmonster Cyn              | NV | 38.74572  | 116.55198   | 2560 | 33  | 2015 | Millar unpublished |
| O-CM134 | Monitor Range        | Greenmonster Cyn              | NV | 38.74565  | 116.55242   | 2558 | 22  | 2015 | Millar unpublished |
| O-CM139 | Winter Ridge         | Slide Mtn                     | OR | 42.68507  | 120.73682   | 1964 | 17  | 2015 | Millar unpublished |

|            |                   |                                |    |            |              |           |     |              |                      |
|------------|-------------------|--------------------------------|----|------------|--------------|-----------|-----|--------------|----------------------|
| O-CM140    | Winter Ridge      | Slide Mtn                      | OR | 42.68402   | 120.73655    | 1981      | 12  | 2015         | Millar unpublished   |
| O-CM141    | Winter Ridge      | Slide Mtn                      | OR | 42.68405   | 120.73653    | 2010      | 12  | 2015         | Millar unpublished   |
| O-CM142    | Winter Ridge      | Slide Mtn                      | OR | 42.68388   | 120.73633    | 2007      | 6   | 2015         | Millar unpublished   |
| O-CM143    | Winter Ridge      | Slide Mtn                      | OR | 42.68462   | 120.73625    | 1945      | 351 | 2015         | Millar unpublished   |
| O-CM144    | Glass Mountains   | Kelty Ridge                    | CA | 37.74631   | 118.65348    | 3035      | 78  | 2016         | Millar unpublished   |
| O-CM145    | Glass Mountains   | Kelty Ridge                    | CA | 37.74671   | 118.65392    | 3023      | 18  | 2016         | Millar unpublished   |
| O-CM147    | Glass Mountains   | Kelty Ridge                    | CA | 37.74849   | 118.65370    | 3027      | 36  | 2016         | Millar unpublished   |
| O-EB2016-1 | Wassuk Mountains  | na                             | NV | na         | na           | 2135      | na  | 2012-2014    | Beever et al. 2016   |
| O-EB2016-2 | Markagunt Plateau | Cedar Breaks National Monument | UT | na         | na           | 2970-3218 | na  | 2014 or 2015 | Beever et al. 2016   |
| O-EB2016-3 | Markagunt Plateau | Dixie National Forest          | UT | na         | na           | 2658-3372 | na  | 2014 or 2015 | Beever et al. 2016   |
| O-JC001    | Hart Mountains    | Escarpment Road                | OR | 42.5696956 | -119.6981200 | 1716      | 315 | 2010         | Castillo et al. 2016 |
| O-JC002    | Hart Mountains    | Escarpment Road                | OR | 42.5699556 | -119.6969200 | 1761      | 291 | 2010         | Castillo et al. 2016 |
| O-JC003    | Hart Mountains    | Goat Creek                     | OR | 42.4156355 | -119.7702100 | 2260      | 275 | 2010         | Castillo et al. 2016 |
| O-JC004    | Hart Mountains    | Goat Creek                     | OR | 42.4155255 | -119.7700300 | 2268      | 258 | 2010         | Castillo et al. 2016 |
| O-JC005    | Hart Mountains    | Goat Creek                     | OR | 42.4152155 | -119.7663100 | 2275      | 99  | 2010         | Castillo et al. 2016 |
| O-JC006    | Hart Mountains    | Goat Creek                     | OR | 42.4124955 | -119.7642800 | 2177      | 31  | 2010         | Castillo et al. 2016 |
| O-JC007    | Hart Mountains    | Goat Creek                     | OR | 42.4129055 | -119.7616100 | 2145      | 185 | 2010         | Castillo et al. 2016 |
| O-JC008    | Hart Mountains    | Goat Creek                     | OR | 42.4127155 | -119.7611900 | 2136      | 172 | 2010         | Castillo et al. 2016 |
| O-JC009    | Hart Mountains    | Escarpment Road Switchback     | OR | 42.5723256 | -119.7109600 | 1678      | 341 | 2010         | Castillo et al. 2016 |
| O-JC010    | Sheldon Plateau   | Horse Canyon                   | NV | 41.7758000 | -119.3489300 | 1855      | 284 | 2010         | Castillo et al. 2016 |
| O-JC011    | Sheldon Plateau   | Fish Creek Spring              | NV | 41.7571900 | -119.3938300 | 1939      | 218 | 2010         | Castillo et al. 2016 |
| O-JC012    | Sheldon Plateau   | Fish Creek Spring              | NV | 41.7568000 | -119.3936900 | 1941      | 204 | 2010         | Castillo et al. 2016 |
| O-JC013    | Sheldon Plateau   | Fish Creek Spring              | NV | 41.7580500 | -119.3878100 | 1943      | 170 | 2010         | Castillo et al. 2016 |
| O-JC014    | Sheldon Plateau   | Fish Creek Spring              | NV | 41.7582600 | -119.3872900 | 1941      | 175 | 2010         | Castillo et al. 2016 |
| O-JC015    | Sheldon Plateau   | Fish Creek Spring              | NV | 41.7583900 | -119.3869400 | 1941      | 180 | 2010         | Castillo et al. 2016 |
| O-JC016    | Sheldon Plateau   | Fish Creek Spring              | NV | 41.7584200 | -119.3865100 | 1939      | 178 | 2010         | Castillo et al. 2016 |
| O-JC017    | Sheldon Plateau   | Fish Creek Spring              | NV | 41.7583700 | -119.3863400 | 1932      | 178 | 2010         | Castillo et al. 2016 |
| O-JC018    | Sheldon Plateau   | Fish Creek Spring              | NV | 41.7585400 | -119.3858600 | 1938      | 180 | 2010         | Castillo et al. 2016 |
| O-JC019    | Sheldon Plateau   | Fish Creek Spring              | NV | 41.7588100 | -119.3836300 | 1940      | 144 | 2010         | Castillo et al. 2016 |
| O-JC020    | Sheldon Plateau   | Fish Creek Spring              | NV | 41.7588500 | -119.3836000 | 1941      | 143 | 2010         | Castillo et al. 2016 |
| O-JC021    | Sheldon Plateau   | Fish Creek Spring              | NV | 41.7592000 | -119.3833400 | 1944      | 135 | 2010         | Castillo et al. 2016 |
| O-JC022    | Sheldon Plateau   | Fish Creek Spring              | NV | 41.7601200 | -119.3804500 | 1931      | 160 | 2010         | Castillo et al. 2016 |
| O-JC023    | Sheldon Plateau   | Echo Canyon                    | NV | 41.8460200 | -119.2804100 | 1895      | 327 | 2010         | Castillo et al. 2016 |
| O-JC024    | Sheldon Plateau   | Echo Canyon                    | NV | 41.8460500 | -119.2803500 | 1900      | 327 | 2010         | Castillo et al. 2016 |
| O-JC025    | Sheldon Plateau   | Echo Canyon                    | NV | 41.8483700 | -119.2803400 | 1841      | 51  | 2010         | Castillo et al. 2016 |
| O-JC026    | Sheldon Plateau   | Fish Creek Mountain            | NV | 41.7501500 | -119.3459900 | 2028      | 346 | 2010         | Castillo et al. 2016 |
| O-JC027    | Sheldon Plateau   | Blowout Mountain               | NV | 41.7151200 | -119.2761500 | 1957      | 187 | 2010         | Castillo et al. 2016 |
| O-JC028    | Sheldon Plateau   | Blowout Mountain               | NV | 41.7164100 | -119.2747100 | 1970      | 169 | 2010         | Castillo et al. 2016 |
| O-JC029    | Sheldon Plateau   | Blowout Mountain               | NV | 41.7168000 | -119.2745100 | 1977      | 170 | 2010         | Castillo et al. 2016 |
| O-JC030    | Sheldon Plateau   | Blowout Mountain               | NV | 41.7166700 | -119.2745000 | 1970      | 170 | 2010         | Castillo et al. 2016 |
| O-JC031    | Sheldon Plateau   | Blowout Mountain               | NV | 41.7167400 | -119.2744800 | 1972      | 170 | 2010         | Castillo et al. 2016 |
| O-JC032    | Sheldon Plateau   | Blowout Mountain               | NV | 41.7167300 | -119.2744300 | 1967      | 168 | 2010         | Castillo et al. 2016 |
| O-JC033    | Sheldon Plateau   | Blowout Mountain               | NV | 41.7169100 | -119.2743900 | 1979      | 168 | 2010         | Castillo et al. 2016 |
| O-JC034    | Sheldon Plateau   | Blowout Mountain               | NV | 41.7170000 | -119.2743200 | 1978      | 172 | 2010         | Castillo et al. 2016 |
| O-JC035    | Sheldon Plateau   | Blowout Mountain               | NV | 41.7158800 | -119.2741500 | 1949      | 162 | 2010         | Castillo et al. 2016 |
| O-JC036    | Sheldon Plateau   | Blowout Mountain               | NV | 41.7163900 | -119.2734800 | 1958      | 152 | 2010         | Castillo et al. 2016 |
| O-JC037    | Sheldon Plateau   | Blowout Mountain               | NV | 41.7164600 | -119.2721400 | 1933      | 161 | 2010         | Castillo et al. 2016 |
| O-JC038    | Sheldon Plateau   | Blowout Mountain               | NV | 41.7174300 | -119.2707600 | 1961      | 187 | 2010         | Castillo et al. 2016 |
| O-JC039    | Sheldon Plateau   | Blowout Mountain               | NV | 41.7176100 | -119.2707100 | 1968      | 177 | 2010         | Castillo et al. 2016 |

|          |                   |                               |    |            |              |      |     |      |                      |
|----------|-------------------|-------------------------------|----|------------|--------------|------|-----|------|----------------------|
| O-JC040  | Sheldon Plateau   | Blowout Mountain              | NV | 41.7178900 | -119.2706100 | 1990 | 172 | 2010 | Castillo et al. 2016 |
| O-JC041  | Sheldon Plateau   | Blowout Mountain              | NV | 41.7203000 | -119.2687700 | 1982 | 284 | 2010 | Castillo et al. 2016 |
| O-JC042  | Sheldon Plateau   | Blowout Mountain              | NV | 41.7205500 | -119.2686300 | 1981 | 284 | 2010 | Castillo et al. 2016 |
| O-JC043  | Sheldon Plateau   | Blowout Mountain              | NV | 41.7230100 | -119.2674300 | 2031 | 253 | 2010 | Castillo et al. 2016 |
| O-JC044  | Sheldon Plateau   | Mahogany Butte                | NV | 41.6156300 | -119.2111500 | 2075 | 56  | 2010 | Castillo et al. 2016 |
| O-JC045  | Sheldon Plateau   | Mahogany Butte                | NV | 41.6161500 | -119.2102800 | 2045 | 63  | 2010 | Castillo et al. 2016 |
| O-JC046  | Sheldon Plateau   | Mahogany Butte                | NV | 41.6161100 | -119.2101600 | 2035 | 71  | 2010 | Castillo et al. 2016 |
| O-JC047  | Sheldon Plateau   | Mahogany Butte                | NV | 41.6161500 | -119.2101300 | 2032 | 70  | 2010 | Castillo et al. 2016 |
| O-JC048  | Sheldon Plateau   | S of Mahogany Butte           | NV | 41.5994700 | -119.2176000 | 1952 | 303 | 2010 | Castillo et al. 2016 |
| O-JC049  | Sheldon Plateau   | S of Mahogany Butte           | NV | 41.6009800 | -119.2153000 | 1940 | 298 | 2010 | Castillo et al. 2016 |
| O-JC050  | Sheldon Plateau   | S of Mahogany Butte           | NV | 41.6010400 | -119.2152900 | 1938 | 298 | 2010 | Castillo et al. 2016 |
| O-JC051  | Sheldon Plateau   | S of Mahogany Butte           | NV | 41.6012500 | -119.2151000 | 1948 | 313 | 2010 | Castillo et al. 2016 |
| O-JC052  | Hart Mountains    | Willow Creek Canyon           | OR | 42.5396555 | -119.7028500 | 2037 | 105 | 2010 | Castillo et al. 2016 |
| O-JC053  | Hart Mountains    | Willow Creek Canyon           | OR | 42.5348756 | -119.7021200 | 1968 | 32  | 2010 | Castillo et al. 2016 |
| O-JC054  | Hart Mountains    | Willow Creek Canyon           | OR | 42.5381355 | -119.7019700 | 1944 | 160 | 2010 | Castillo et al. 2016 |
| O-JC055  | Hart Mountains    | Willow Creek Canyon           | OR | 42.5380156 | -119.7018500 | 1930 | 169 | 2010 | Castillo et al. 2016 |
| O-JC056  | Hart Mountains    | Willow Creek Canyon           | OR | 42.5349155 | -119.7016000 | 1958 | 26  | 2010 | Castillo et al. 2016 |
| O-JC057  | Hart Mountains    | Willow Creek Canyon           | OR | 42.5348555 | -119.7015900 | 1954 | 26  | 2010 | Castillo et al. 2016 |
| O-JC058  | Hart Mountains    | Willow Creek Canyon           | OR | 42.5347955 | -119.7015100 | 1953 | 26  | 2010 | Castillo et al. 2016 |
| O-JC059  | Hart Mountains    | Willow Creek Canyon           | OR | 42.5373056 | -119.7011400 | 1908 | 51  | 2010 | Castillo et al. 2016 |
| O-JC060  | Hart Mountains    | Willow Creek Canyon           | OR | 42.5396656 | -119.6987400 | 1895 | 114 | 2010 | Castillo et al. 2016 |
| O-JC061  | Hart Mountains    | Calderwood Ranch              | OR | 42.3815455 | -119.7728300 | 2194 | 190 | 2010 | Castillo et al. 2016 |
| O-JC062  | Hart Mountains    | Calderwood Ranch              | OR | 42.3814555 | -119.7726800 | 2190 | 192 | 2010 | Castillo et al. 2016 |
| O-JC063  | Hart Mountains    | Calderwood Ranch              | OR | 42.3815355 | -119.7726500 | 2198 | 192 | 2010 | Castillo et al. 2016 |
| O-JC064  | Hart Mountains    | Calderwood Ranch              | OR | 42.3810455 | -119.7720300 | 2178 | 204 | 2010 | Castillo et al. 2016 |
| O-JC065  | Hart Mountains    | Calderwood Ranch              | OR | 42.3798055 | -119.7724300 | 2180 | 69  | 2010 | Castillo et al. 2016 |
| O-JC066  | Hart Mountains    | Calderwood Ranch              | OR | 42.3796955 | -119.7723400 | 2178 | 85  | 2010 | Castillo et al. 2016 |
| O-JC067  | Hart Mountains    | Degarmo Canyon                | OR | 42.4804599 | -119.7636400 | 2057 | 336 | 2010 | Castillo et al. 2016 |
| O-JC068  | Hart Mountains    | Degarmo Canyon (from top)     | OR | 42.4776691 | -119.7591200 | 2355 | 31  | 2010 | Castillo et al. 2016 |
| O-JC069  | Hart Mountains    | Bog Creek                     | OR | 42.3796163 | -119.7527900 | 1812 | 135 | 2010 | Castillo et al. 2016 |
| O-JC070  | Hart Mountains    | Bog Creek                     | OR | 42.3799000 | -119.7524400 | 1815 | 143 | 2010 | Castillo et al. 2016 |
| O-JC071  | Sheldon Plateau   | Canyon NE of Catnip Reservoir | NV | 41.9150402 | -119.3761800 | 1874 | 246 | 2010 | Castillo et al. 2016 |
| O-JC072  | Sheldon Plateau   | Canyon NE of Catnip Reservoir | NV | 41.9146713 | -119.3760000 | 1898 | 238 | 2010 | Castillo et al. 2016 |
| O-JC073  | Sheldon Plateau   | Guano Rim                     | NV | 41.9767547 | -119.4892300 | 1857 | 322 | 2010 | Castillo et al. 2016 |
| O-JC074  | Massacre Rim      | na                            | NV | 41.7551252 | -119.6990600 | 1830 | 23  | 2010 | Castillo et al. 2016 |
| O-JC075  | Massacre Rim      | na                            | NV | 41.7549369 | -119.6964800 | 1865 | 328 | 2010 | Castillo et al. 2016 |
| O-JC076  | Massacre Rim      | na                            | NV | 41.7548914 | -119.6963300 | 1870 | 331 | 2010 | Castillo et al. 2016 |
| O-JC077  | Massacre Rim      | na                            | NV | 41.7574111 | -119.6917400 | 1890 | 323 | 2010 | Castillo et al. 2016 |
| O-JC078  | Sheldon Plateau   | Catnip Canyon                 | NV | 41.9418832 | -119.4160600 | 1815 | 230 | 2010 | Castillo et al. 2016 |
| O-JC079  | Sheldon Plateau   | Catnip Canyon                 | NV | 41.9372437 | -119.4125100 | 1835 | 69  | 2010 | Castillo et al. 2016 |
| O-JC080  | Sheldon Plateau   | Catnip Canyon                 | NV | 41.9367635 | -119.4118300 | 1829 | 1   | 2010 | Castillo et al. 2016 |
| O-JC081  | Sheldon Plateau   | 2 km NE Andy's Place          | NV | 41.8081263 | -119.3661200 | 1960 | 167 | 2010 | Castillo et al. 2016 |
| O-JC082  | Sheldon Plateau   | 2 km NE Andy's Place          | NV | 41.8080258 | -119.3654100 | 1957 | 183 | 2010 | Castillo et al. 2016 |
| O-JC083  | Sheldon Plateau   | 2 km NE Andy's Place          | NV | 41.8041749 | -119.3645500 | 1961 | 329 | 2010 | Castillo et al. 2016 |
| O-MASS-1 | Cascade Mountains | Black Mountain                | CA | na         | na           | 1859 | na  | 2012 | Massing 2012         |

na, not available
